# Supplementary material for: Antioxidant Activity of Flavonoids and Phenolic Acids from Dodonaea angustifolia Flower: HPLC Profile and PASS Prediction
Source: Hindawi journal article supplement (doi:10.1155/2023/8315711), 2023-03-30
Supplement: f1 [file 8315711.f1.pdf]

| Quercetin |       |          | Rutin                                 |       |          |                                  |                            |
|-----------|-------|----------|---------------------------------------|-------|----------|----------------------------------|----------------------------|
| Pa        | Pi    | Activity | Pa                                    | Pi    | Activity |                                  |                            |
| 1         | 0,973 | 0,002    | Membrane integrity agonist            | 0,993 | 0,001    | Hemostatic                       |                            |
|           | 0,969 | 0,002    | HIF1A expression inhibitor            | 0,990 | 0,000    | Membrane permeability in         | 1                          |
| 2         | 0,962 | 0,001    | Peroxidase inhibitor                  | 1     | 0,988    | 0,001                            | Free radical scavenger     |
|           | 0,957 | 0,002    | HMOX1 expression enhancer             | 0,988 | 0,001    | Cardioprotectant                 |                            |
|           | 0,951 | 0,001    | CYP1A inducer                         | 2     | 0,987    | 0,001                            | Lipid peroxidase inhibitor |
|           | 0,945 | 0,004    | CYP1A substrate                       | 3     | 0,984    | 0,001                            | Membrane integrity agonist |
|           | 0,944 | 0,002    | UGT1A6 substrate                      | 0,983 | 0,001    | CYP1A inducer                    |                            |
| 3         | 0,940 | 0,001    | Antimutagenic                         | 0,983 | 0,001    | Anticarcinogenic                 |                            |
|           | 0,940 | 0,003    | CYP1A1 substrate                      | 0,980 | 0,001    | Vasoprotector                    | 2                          |
|           | 0,939 | 0,002    | UGT1A10 substrate                     | 0,975 | 0,001    | CYP1A1 inducer                   |                            |
|           | 0,938 | 0,003    | Membrane permeability inhibitor       | 0,974 | 0,001    | Xanthine dehydrogenase in        | 3                          |
|           | 0,934 | 0,001    | Quercetin 2,3-dioxygenase inhibitor   | 0,969 | 0,002    | UDP-glucuronosyltransferase sub  |                            |
|           | 0,933 | 0,001    | MAP kinase stimulant                  | 0,968 | 0,001    | Hepatoprotectant                 |                            |
|           | 0,931 | 0,002    | UGT1A9 substrate                      | 0,968 | 0,001    | Chemopreventive                  |                            |
|           | 0,930 | 0,001    | CYP1A1 inducer                        | 0,965 | 0,001    | Monophenol monooxygenase inh     |                            |
|           | 0,930 | 0,003    | CYP1A inhibitor                       | 0,952 | 0,001    | Proliferative diseases treatment |                            |
|           | 0,928 | 0,002    | NADPH oxidase inhibitor               | 0,948 | 0,001    | Histamine release stimulant      |                            |
|           | 0,924 | 0,001    | Beta-carotene 15,15'-monooxygenase    | 0,942 | 0,001    | Morphine 6-dehydrogenase inhibi  |                            |
|           | 0,924 | 0,007    | CYP2C12 substrate                     | 0,939 | 0,000    | Capillary fragility treatment    |                            |
|           | 0,920 | 0,001    | Chalcone isomerase inhibitor          | 0,928 | 0,003    | Anaphylatoxin receptor antagonis |                            |
|           | 0,910 | 0,004    | CYP1A2 substrate                      | 4     | 0,923    | 0,003                            | Antioxidant                |
|           | 0,909 | 0,001    | CYP1A1 inhibitor                      | 0,919 | 0,007    | CDP-glycerol glycerophosphotran: |                            |
|           | 0,909 | 0,003    | CYP1A2 inhibitor                      | 0,907 | 0,003    | Antiprotozoal (Leishmania)       |                            |
|           | 0,900 | 0,005    | Ubiquinol-cytochrome-c reductase inhi | 0,900 | 0,003    | Antihypercholesterolemic         |                            |
|           | 0,898 | 0,001    | 2-Enoate reductase inhibitor          | 0,893 | 0,005    | TP53 expression enhancer         |                            |
|           | 0,895 | 0,002    | Histidine kinase inhibitor            | 0,886 | 0,002    | Antidote                         |                            |
|           | 0,894 | 0,002    | UGT1A3 substrate                      | 0,865 | 0,003    | UGT1A substrate                  |                            |
|           | 0,894 | 0,003    | UGT1A substrate                       | 0,859 | 0,004    | 2-Dehydropantoate 2-reductase ii |                            |
|           | 0,894 | 0,004    | Aldehyde oxidase inhibitor            | 0,858 | 0,001    | Alpha glucosidase inhibitor      |                            |
|           | 0,891 | 0,001    | Iodide peroxidase inhibitor           | 0,858 | 0,001    | Aryl hydrocarbon receptor agonis |                            |
|           | 0,887 | 0,002    | AR expression inhibitor               | 0,855 | 0,000    | Beta-N-acetylhexosaminidase inhi |                            |
| 4         | 0,887 | 0,005    | Apoptosis agonist                     | 0,854 | 0,004    | CYP3A4 inducer                   |                            |
|           | 0,875 | 0,005    | Anaphylatoxin receptor antagonist     | 0,854 | 0,010    | Benzoate-CoA ligase inhibitor    |                            |
|           | 0,873 | 0,001    | CYP19 inhibitor                       | 0,850 | 0,002    | NADPH oxidase inhibitor          |                            |
|           | 0,872 | 0,001    | CYP1B1 inhibitor                      | 0,849 | 0,007    | Antineoplastic                   |                            |
| 5         | 0,872 | 0,003    | Antioxidant                           | 0,842 | 0,009    | HIF1A expression inhibitor       |                            |
|           | 0,866 | 0,002    | UGT1A1 substrate                      | 0,839 | 0,004    | Caspase 3 stimulant              |                            |
|           | 0,857 | 0,004    | UDP-glucuronosyltransferase substrate | 0,832 | 0,002    | CYP2C9 inducer                   |                            |
|           | 0,853 | 0,001    | Testosterone 17beta-dehydrogenase ir  | 0,825 | 0,014    | CYP2H substrate                  | 4                          |
|           | 0,850 | 0,002    | NOS2 expression inhibitor             | 0,824 | 0,016    | Chlordecone reductase inhibitor  |                            |
|           | 0,844 | 0,008    | TP53 expression enhancer              | 0,819 | 0,005    | CYP3A inducer                    |                            |
|           | 0,835 | 0,013    | Antiseborrheic                        | 0,819 | 0,005    | Kinase inhibitor                 |                            |
|           | 0,833 | 0,003    | Cardioprotectant                      | 0,815 | 0,003    | Lactase inhibitor                |                            |
|           | 0,831 | 0,005    | CYP3A4 inducer                        | 0,797 | 0,004    | P-benzoquinone reductase (NADP   |                            |

|         |       |                                         |         |       |                                     |   |
|---------|-------|-----------------------------------------|---------|-------|-------------------------------------|---|
| 0,824   | 0,004 | Vasoprotector                           | 0,784   | 0,006 | Antifungal                          | 5 |
| 0,817   | 0,029 | Aspulvinone dimethylallyltransferase ir | 0,777   | 0,003 | Mycothioli-S-conjugate amidase ir   |   |
| 0,815   | 0,002 | UGT1A8 substrate                        | 0,776   | 0,002 | Laxative                            |   |
| 6 0,813 | 0,002 | 1-Alkylglycerophosphocholine O-acetyl   | 0,774   | 0,003 | Trans-1,2-dihydrobenzene-1,2-dic    |   |
| 0,811   | 0,003 | Free radical scavenger                  | 0,764   | 0,003 | Beta glucuronidase inhibitor        |   |
| 0,809   | 0,005 | Kinase inhibitor                        | 0,758   | 0,010 | Membrane integrity antagonist       |   |
| 0,797   | 0,002 | SULT1A3 substrate                       | 0,755   | 0,002 | Skin whitener                       |   |
| 0,797   | 0,012 | Antineoplastic                          | 5 0,753 | 0,004 | HMOX1 expression enhancer           |   |
| 0,794   | 0,002 | Xanthine oxidase inhibitor              | 0,749   | 0,005 | NADPH-ferrihemoprotein reducta      |   |
| 0,794   | 0,006 | CYP3A inducer                           | 0,747   | 0,011 | Apoptosis agonist                   |   |
| 0,792   | 0,003 | Monophenol monooxygenase inhibitor      | 0,743   | 0,004 | Antiviral (Influenza)               |   |
| 0,789   | 0,004 | Sulfotransferase substrate              | 0,742   | 0,004 | Radiosensitizer                     |   |
| 0,788   | 0,004 | Lipid peroxidase inhibitor              | 6 0,741 | 0,001 | Glutathione-disulfide reductase in  |   |
| 0,787   | 0,009 | JAK2 expression inhibitor               | 0,740   | 0,006 | Vasodilator                         |   |
| 0,776   | 0,004 | APOA1 expression enhancer               | 0,734   | 0,003 | 4-Coumarate-CoA ligase inhibitor    |   |
| 0,775   | 0,002 | UGT2B15 substrate                       | 0,734   | 0,006 | Histidine kinase inhibitor          |   |
| 0,775   | 0,004 | Alcohol dehydrogenase (NADP+) inhibi    | 0,728   | 0,013 | Antiinflammatory                    |   |
| 0,773   | 0,001 | Xanthine dehydrogenase inhibitor        | 0,725   | 0,009 | Radioprotector                      |   |
| 0,771   | 0,003 | Hemostatic                              | 0,723   | 0,004 | Xenobiotic-transporting ATPase ir   |   |
| 0,770   | 0,001 | 3-Oxoacyl-[acyl-carrier-protein] syntha | 0,711   | 0,009 | Cytostatic                          |   |
| 0,757   | 0,007 | Anticarcinogenic                        | 0,705   | 0,004 | UGT1A7 substrate                    |   |
| 0,755   | 0,005 | CYP2B5 substrate                        | 0,704   | 0,005 | Hepatic disorders treatment         |   |
| 0,754   | 0,005 | 4-Nitrophenol 2-monooxygenase inhib     | 0,703   | 0,003 | Nitric oxide antagonist             |   |
| 0,753   | 0,004 | Pectate lyase inhibitor                 | 0,694   | 0,016 | Oxidoreductase inhibitor            |   |
| 0,751   | 0,003 | Histamine release stimulant             | 0,691   | 0,004 | Caspase 8 stimulant                 |   |
| 0,751   | 0,034 | Mucomembranous protector                | 0,685   | 0,009 | Antithrombotic                      |   |
| 0,748   | 0,001 | Glutathione-disulfide reductase inhibit | 0,677   | 0,005 | Antibacterial                       | 6 |
| 0,737   | 0,001 | Capillary fragility treatment           | 0,676   | 0,038 | Sugar-phosphatase inhibitor         |   |
| 0,736   | 0,014 | CYP2C substrate                         | 0,674   | 0,001 | Melanin inhibitor                   |   |
| 0,734   | 0,005 | MMP9 expression inhibitor               | 0,671   | 0,035 | Alkenylglycerophosphocholine hy     |   |
| 0,733   | 0,004 | UGT2B substrate                         | 0,668   | 0,002 | Xanthine oxidase inhibitor          |   |
| 0,730   | 0,010 | 27-Hydroxycholesterol 7alpha-monoox     | 0,662   | 0,005 | Sulfotransferase substrate          |   |
| 0,729   | 0,002 | Astringent                              | 0,660   | 0,010 | UGT1A9 substrate                    |   |
| 0,720   | 0,004 | Histamine release inhibitor             | 0,659   | 0,006 | UGT1A1 substrate                    |   |
| 0,717   | 0,006 | Chemopreventive                         | 0,657   | 0,009 | Antiinfective                       |   |
| 0,714   | 0,049 | Gluconate 2-dehydrogenase (acceptor)    | 0,652   | 0,002 | Aldose reductase inhibitor          |   |
| 0,714   | 0,050 | Testosterone 17beta-dehydrogenase (I    | 0,652   | 0,002 | DNA ligase (ATP) inhibitor          |   |
| 0,708   | 0,004 | UGT2B12 substrate                       | 0,643   | 0,015 | NAD(P)+-arginine ADP-ribosyltran    |   |
| 0,706   | 0,006 | CYP2A4 substrate                        | 0,638   | 0,005 | Alkylator                           |   |
| 0,706   | 0,007 | Hepatoprotectant                        | 0,632   | 0,004 | Vascular (periferal) disease treatn |   |
| 0,695   | 0,002 | RELA expression inhibitor               | 0,630   | 0,005 | Malate dehydrogenase inhibitor      |   |
| 0,689   | 0,017 | Antiinflammatory                        | 0,621   | 0,001 | Vitamin                             |   |
| 0,684   | 0,056 | CYP2J substrate                         | 0,607   | 0,022 | Immunostimulant                     |   |
| 0,682   | 0,002 | Morphine 6-dehydrogenase inhibitor      | 0,606   | 0,002 | Hypoxia inducible factor 1 alpha i  |   |
| 0,681   | 0,005 | Beta glucuronidase inhibitor            | 0,605   | 0,010 | Antimycobacterial                   |   |
| 0,680   | 0,007 | Reductant                               | 0,603   | 0,010 | 1-Alkylglycerophosphocholine O-z    |   |
| 0,679   | 0,013 | CYP2C9 substrate                        | 0,602   | 0,029 | Immunosuppressant                   |   |

|       |       |                                        |       |       |                                    |
|-------|-------|----------------------------------------|-------|-------|------------------------------------|
| 0,676 | 0,003 | CF transmembrane conductance regulat   | 0,600 | 0,012 | Reductant                          |
| 0,676 | 0,004 | Chemoprotective                        | 0,598 | 0,012 | 3-Phytase inhibitor                |
| 0,670 | 0,004 | UGT1A7 substrate                       | 0,595 | 0,009 | Transcription factor stimulant     |
| 0,667 | 0,004 | Trans-1,2-dihydrobenzene-1,2-diol deh  | 0,595 | 0,009 | Transcription factor NF kappa B st |
| 0,666 | 0,001 | Beta-N-acetylhexosaminidase inhibitor  | 0,587 | 0,015 | Platelet adhesion inhibitor        |
| 0,659 | 0,006 | Leukotriene-B4 20-monooxygenase inh    | 0,586 | 0,012 | Antiulcerative                     |
| 0,659 | 0,040 | Fibrinolytic                           | 0,583 | 0,016 | Aspartyltransferase inhibitor      |
| 0,656 | 0,004 | 4-Coumarate-CoA ligase inhibitor       | 0,581 | 0,005 | Chemoprotective                    |
| 0,653 | 0,046 | CYP2J2 substrate                       | 0,578 | 0,006 | Angiogenesis stimulant             |
| 0,651 | 0,009 | Cholestanetriol 26-monooxygenase inh   | 0,577 | 0,004 | RNA synthesis inhibitor            |
| 0,650 | 0,005 | Plastoquinol-plastocyanin reductase in | 0,575 | 0,001 | Phosphoenolpyruvate carboxylase    |
| 0,648 | 0,030 | Dehydro-L-gulonate decarboxylase inh   | 0,575 | 0,006 | Mannosyl-glycoprotein endo-beta    |
| 0,646 | 0,015 | Cytoprotectant                         | 0,574 | 0,044 | CYP3A substrate                    |
| 0,645 | 0,007 | Tetrahydroxynaphthalene reductase in   | 0,573 | 0,015 | Histamine release inhibitor        |
| 0,645 | 0,017 | Insulysin inhibitor                    | 0,572 | 0,035 | Glycerol-ether monooxygenase in    |
| 0,634 | 0,004 | CYP1B substrate                        | 0,571 | 0,026 | Respiratory analeptic              |
| 0,632 | 0,012 | CYP2C11 substrate                      | 0,569 | 0,008 | Interleukin 2 agonist              |
| 0,630 | 0,025 | Alkane 1-monooxygenase inhibitor       | 0,560 | 0,044 | CYP3A2 substrate                   |
| 0,627 | 0,022 | CYP2B6 substrate                       | 0,559 | 0,004 | Sweetener                          |
| 0,625 | 0,015 | Pin1 inhibitor                         | 0,557 | 0,030 | Trans-acenaphthene-1,2-diol deh    |
| 0,625 | 0,019 | Trans-acenaphthene-1,2-diol dehydrog   | 0,553 | 0,030 | Hypolipemic                        |
| 0,623 | 0,004 | Nitric oxide antagonist                | 0,549 | 0,012 | CYP2E1 inducer                     |
| 0,617 | 0,037 | CYP3A4 substrate                       | 0,545 | 0,053 | CYP3A4 substrate                   |
| 0,615 | 0,003 | DNA ligase (ATP) inhibitor             | 0,542 | 0,013 | Chemosensitizer                    |
| 0,614 | 0,010 | Proliferative diseases treatment       | 0,541 | 0,005 | Maillard reaction inhibitor        |
| 0,614 | 0,012 | Steroid N-acetylglucosaminyltransferas | 0,541 | 0,008 | Dementia treatment                 |
| 0,610 | 0,033 | Oxidoreductase inhibitor               | 0,541 | 0,031 | CYP3A5 substrate                   |
| 0,602 | 0,033 | Glutathione thiolesterase inhibitor    | 0,539 | 0,008 | Levansucrase inhibitor             |
| 0,601 | 0,003 | Antihemorrhagic                        | 0,536 | 0,016 | Antineoplastic (breast cancer)     |
| 0,601 | 0,004 | CYP19A1 expression inhibitor           | 0,536 | 0,063 | Acute neurologic disorders treatm  |
| 0,594 | 0,043 | Kidney function stimulant              | 0,531 | 0,023 | CYP1A substrate                    |
| 0,592 | 0,016 | CYP2A2 substrate                       | 0,530 | 0,008 | CYP3A7 substrate                   |
| 0,591 | 0,031 | 2-Hydroxyquinoline 8-monooxygenase     | 0,529 | 0,027 | Nucleotide metabolism regulator    |
| 0,591 | 0,032 | CYP3A2 substrate                       | 0,528 | 0,019 | Antidiabetic                       |
| 0,589 | 0,019 | CYP2A6 substrate                       | 0,526 | 0,007 | Antiviral (Herpes)                 |
| 0,588 | 0,003 | Skin whitener                          | 0,522 | 0,015 | Antimetastatic                     |
| 0,588 | 0,011 | CYP2A11 substrate                      | 0,521 | 0,003 | Severe acute respiratory syndrom   |
| 0,588 | 0,014 | Neurotransmitter antagonist            | 0,521 | 0,004 | Interleukin agonist                |
| 0,587 | 0,002 | Severe acute respiratory syndrome tre  | 0,518 | 0,011 | Non-steroidal antiinflammatory a   |
| 0,583 | 0,002 | DOPA decarboxylase inhibitor           | 0,517 | 0,013 | UGT2B substrate                    |
| 0,583 | 0,006 | Transcription factor inhibitor         | 0,517 | 0,019 | Bilirubin oxidase inhibitor        |
| 0,583 | 0,019 | Radiosensitizer                        | 0,516 | 0,051 | Glucan endo-1,3-beta-D-glucosid    |
| 0,582 | 0,042 | CYP3A substrate                        | 0,514 | 0,014 | Mediator release inhibitor         |
| 0,578 | 0,007 | CYP2C9 inducer                         | 0,512 | 0,004 | ICAM1 expression inhibitor         |
| 0,577 | 0,012 | Antineoplastic (breast cancer)         | 0,512 | 0,145 | Ubiquinol-cytochrome-c reductas    |
| 0,577 | 0,038 | Glucan endo-1,6-beta-glucosidas        | 0,510 | 0,025 | APOA1 expression enhancer          |
| 0,575 | 0,016 | Antiprotozoal (Leishmania)             | 0,507 | 0,004 | Antiprotozoal (Plasmodium)         |

|       |       |                                                        |       |       |                                                          |
|-------|-------|--------------------------------------------------------|-------|-------|----------------------------------------------------------|
| 0,575 | 0,045 | Complement factor D inhibitor                          | 0,506 | 0,059 | CYP2C8 inhibitor                                         |
| 0,573 | 0,035 | Feruloyl esterase inhibitor                            | 0,505 | 0,015 | Cell adhesion molecule inhibitor                         |
| 0,572 | 0,022 | NAD(P)+-arginine ADP-ribosyltransferase inhibitor      | 0,504 | 0,040 | Manganese peroxidase inhibitor                           |
| 0,571 | 0,026 | Lipid metabolism regulator                             | 0,503 | 0,015 | Antimutagenic                                            |
| 0,569 | 0,004 | Interleukin 4 antagonist                               | 0,498 | 0,038 | Antihypoxic                                              |
| 0,569 | 0,036 | Thioredoxin inhibitor                                  | 0,496 | 0,002 | Gastritis treatment                                      |
| 0,567 | 0,015 | 5 Hydroxytryptamine release inhibitor                  | 0,495 | 0,017 | CYP1A1 substrate                                         |
| 0,566 | 0,064 | Sugar-phosphatase inhibitor                            | 0,494 | 0,029 | Spasmolytic                                              |
| 0,563 | 0,025 | Platelet adhesion inhibitor                            | 0,492 | 0,013 | Chloride channel blocker                                 |
| 0,561 | 0,003 | Lactoylglutathione lyase inhibitor                     | 0,490 | 0,072 | Mannotetraose 2-alpha-N-acetylglucosaminidase inhibitor  |
| 0,561 | 0,024 | CYP2A substrate                                        | 0,489 | 0,029 | AR expression inhibitor                                  |
| 0,560 | 0,010 | 1-Acylglycerol-3-phosphate O-acyltransferase inhibitor | 0,487 | 0,023 | Dolichyl-diphosphooligosaccharidyl transferase inhibitor |
| 0,559 | 0,068 | Taurine dehydrogenase inhibitor                        | 0,484 | 0,011 | Antiprotozoal                                            |
| 0,558 | 0,003 | Thyroxine 5-deiodinase inhibitor                       | 0,479 | 0,010 | UGT1A8 substrate                                         |
| 0,557 | 0,004 | Aryl hydrocarbon receptor agonist                      | 0,477 | 0,038 | Alkenylglycerophosphoethanolamine synthase inhibitor     |
| 0,556 | 0,004 | HCV IRES inhibitor                                     | 0,474 | 0,042 | Peroxidase inhibitor                                     |
| 0,553 | 0,006 | CYP2A5 substrate                                       | 0,473 | 0,022 | H+-exporting ATPase inhibitor                            |
| 0,552 | 0,032 | Alopecia treatment                                     | 0,472 | 0,024 | Membrane permeability enhancer                           |
| 0,550 | 0,030 | Ecdysone 20-monooxygenase inhibitor                    | 0,468 | 0,003 | Hydroxysteroid dehydrogenase inhibitor                   |
| 0,549 | 0,004 | Estrogen antagonist                                    | 0,468 | 0,060 | Lipid metabolism regulator                               |
| 0,547 | 0,002 | Creatine kinase inhibitor                              | 0,467 | 0,006 | Maltose-transporting ATPase inhibitor                    |
| 0,547 | 0,011 | Nitrite reductase [NAD(P)H] inhibitor                  | 0,466 | 0,134 | Phosphatase inhibitor                                    |
| 0,546 | 0,004 | Estrogen receptor beta antagonist                      | 0,465 | 0,037 | Mucinamylserine mucinaminidase inhibitor                 |
| 0,544 | 0,003 | Telomerase inhibitor                                   | 0,464 | 0,012 | NOS2 expression inhibitor                                |
| 0,543 | 0,050 | NADPH-cytochrome-c2 reductase inhibitor                | 0,461 | 0,041 | 5 Hydroxytryptamine release inhibitor                    |
| 0,541 | 0,021 | Radioprotector                                         | 0,457 | 0,052 | Exoribonuclease II inhibitor                             |
| 0,541 | 0,037 | Nitrate reductase (cytochrome) inhibitor               | 0,455 | 0,004 | Interleukin 4 antagonist                                 |
| 0,540 | 0,004 | NF-E2-related factor 2 stimulant                       | 0,455 | 0,009 | Protein synthesis inhibitor                              |
| 0,538 | 0,003 | Melanin inhibitor                                      | 0,455 | 0,015 | Wound healing agent                                      |
| 0,538 | 0,019 | 5 Hydroxytryptamine uptake stimulant                   | 0,452 | 0,023 | Myc inhibitor                                            |
| 0,537 | 0,009 | CYP2G1 substrate                                       | 0,451 | 0,009 | Antiviral (Hepatitis B)                                  |
| 0,537 | 0,059 | NADPH peroxidase inhibitor                             | 0,450 | 0,019 | Antileukemic                                             |
| 0,536 | 0,027 | CYP2A1 substrate                                       | 0,449 | 0,006 | 4-Alpha-glucanotransferase inhibitor                     |
| 0,533 | 0,021 | Cytostatic                                             | 0,449 | 0,065 | Antineoplastic (non-Hodgkin's lymphoma)                  |
| 0,531 | 0,011 | Antiseptic                                             | 0,448 | 0,017 | CF transmembrane conductance regulator                   |
| 0,531 | 0,062 | Ribulose-phosphate 3-epimerase inhibitor               | 0,447 | 0,045 | CYP2B6 substrate                                         |
| 0,531 | 0,103 | Nicotinic alpha6beta3beta4alpha5 receptor antagonist   | 0,444 | 0,021 | RELA expression inhibitor                                |
| 0,530 | 0,005 | Maillard reaction inhibitor                            | 0,443 | 0,018 | Antineoplastic (lung cancer)                             |
| 0,528 | 0,008 | CYP3A7 substrate                                       | 0,442 | 0,078 | UDP-N-acetylglucosamine 4-epimerase                      |
| 0,527 | 0,042 | Oxygen scavenger                                       | 0,437 | 0,028 | CDP-diacylglycerol-serine O-phosphatase                  |
| 0,525 | 0,003 | 15-Lipoxygenase inhibitor                              | 0,435 | 0,073 | MAP kinase stimulant                                     |
| 0,520 | 0,025 | CYP2C19 substrate                                      | 0,434 | 0,045 | Analeptic                                                |
| 0,516 | 0,011 | 2,3-Dihydroxyindole 2,3-dioxygenase inhibitor          | 0,433 | 0,105 | General pump inhibitor                                   |
| 0,516 | 0,020 | Antihypercholesterolemic                               | 0,432 | 0,010 | GDP-mannose 6-dehydrogenase inhibitor                    |
| 0,515 | 0,043 | CYP3A1 substrate                                       | 0,431 | 0,110 | Ribulose-phosphate 3-epimerase                           |
| 0,514 | 0,005 | Estrogen agonist                                       | 0,428 | 0,010 | Glucan 1,6-alpha-glucosidase inhibitor                   |
| 0,514 | 0,028 | CYP2F1 substrate                                       | 0,428 | 0,141 | Pseudolysin inhibitor                                    |

|       |       |                                          |       |       |                                    |
|-------|-------|------------------------------------------|-------|-------|------------------------------------|
| 0,512 | 0,011 | UGT1A4 substrate                         | 0,425 | 0,045 | Vasodilator, coronary              |
| 0,512 | 0,067 | Acetylcholine neuromuscular blocking     | 0,424 | 0,015 | Polyribonucleotide nucleotidyltra  |
| 0,511 | 0,011 | Hepatic disorders treatment              | 0,418 | 0,040 | UGT2B12 substrate                  |
| 0,509 | 0,052 | Ovulation inhibitor                      | 0,418 | 0,041 | GABA aminotransferase inhibitor    |
| 0,505 | 0,018 | 4-Methoxybenzoate monooxygenase (        | 0,417 | 0,022 | Beta-carotene 15,15'-monooxyge     |
| 0,502 | 0,017 | Glyoxylate oxidase inhibitor             | 0,416 | 0,002 | Phosphatidylglycerol-membrane-     |
| 0,502 | 0,092 | Glutamyl endopeptidase II inhibitor      | 0,416 | 0,036 | P-glycoprotein substrate           |
| 0,501 | 0,012 | GST M substrate                          | 0,415 | 0,012 | Antidiabetic symptomatic           |
| 0,501 | 0,029 | TNF expression inhibitor                 | 0,415 | 0,042 | CYP1A2 substrate                   |
| 0,500 | 0,011 | Xenobiotic-transporting ATPase inhibit   | 0,410 | 0,003 | Selectin P antagonist              |
| 0,499 | 0,028 | Caspase 3 stimulant                      | 0,408 | 0,013 | Phospholipase A1 inhibitor         |
| 0,498 | 0,005 | Antiviral (Hepatitis B)                  | 0,407 | 0,026 | CYP2A11 substrate                  |
| 0,498 | 0,018 | Gonadotropin antagonist                  | 0,406 | 0,008 | Aldose reductase substrate         |
| 0,498 | 0,044 | Aminobutyraldehyde dehydrogenase ir      | 0,404 | 0,007 | Apoptosis antagonist               |
| 0,497 | 0,010 | 2,6-Dihydroxypyridine 3-monooxygena      | 0,401 | 0,012 | UGT2B15 substrate                  |
| 0,493 | 0,004 | Antidote                                 | 0,401 | 0,025 | UGT1A6 substrate                   |
| 0,491 | 0,075 | Platelet aggregation stimulant           | 0,400 | 0,030 | Cyclomaltodextrinase inhibitor     |
| 0,490 | 0,017 | Mediator release inhibitor               | 0,399 | 0,028 | DNA synthesis inhibitor            |
| 0,490 | 0,032 | Antifungal                               | 0,399 | 0,033 | CYP19A1 expression inhibitor       |
| 0,490 | 0,085 | Chlordecone reductase inhibitor          | 0,397 | 0,005 | Beta-D-fucosidase inhibitor        |
| 0,489 | 0,027 | CYP2B substrate                          | 0,395 | 0,004 | Oligo-1,6-glucosidase inhibitor    |
| 0,489 | 0,117 | Phosphatase inhibitor                    | 0,395 | 0,031 | Fructan beta-fructosidase inhibito |
| 0,488 | 0,050 | Fatty-acyl-CoA synthase inhibitor        | 0,393 | 0,033 | Antiparasitic                      |
| 0,488 | 0,089 | 5-O-(4-coumaroyl)-D-quinic acid 3'-monoc | 0,388 | 0,038 | Mannose isomerase inhibitor        |
| 0,487 | 0,007 | CYP2C6 substrate                         | 0,388 | 0,093 | CYP3A1 substrate                   |
| 0,487 | 0,010 | Choleretic                               | 0,387 | 0,006 | Alkaline phosphatase inhibitor     |
| 0,486 | 0,028 | Vasodilator, coronary                    | 0,385 | 0,006 | [phosphorylase] phosphatase inhi   |
| 0,484 | 0,012 | Antiviral (Herpes)                       | 0,385 | 0,007 | Interleukin 6 antagonist           |
| 0,483 | 0,023 | CYP2E1 inducer                           | 0,384 | 0,009 | 3-Methylbutanal reductase inhibiti |
| 0,479 | 0,004 | Pim-1 kinase inhibitor                   | 0,384 | 0,008 | Ceramide glucosyltransferase inhi  |
| 0,477 | 0,004 | GABA C receptor antagonist               | 0,381 | 0,061 | CYP2A6 substrate                   |
| 0,477 | 0,061 | Preneoplastic conditions treatment       | 0,380 | 0,011 | (N-acetylneuraminy)-galactosylgl   |
| 0,477 | 0,064 | UDP-N-acetylglucosamine 4-epimerase      | 0,378 | 0,125 | 27-Hydroxycholesterol 7alpha-mc    |
| 0,477 | 0,081 | Mucositis treatment                      | 0,377 | 0,022 | Antitussive                        |
| 0,475 | 0,124 | Chymosin inhibitor                       | 0,374 | 0,021 | Hyaluronic acid agonist            |
| 0,475 | 0,124 | Saccharopepsin inhibitor                 | 0,371 | 0,016 | Quercetin 2,3-dioxygenase inhibiti |
| 0,475 | 0,124 | Acrocylindropepsin inhibitor             | 0,368 | 0,009 | Antibiotic                         |
| 0,472 | 0,025 | Vasodilator                              | 0,366 | 0,043 | Antituberculosic                   |
| 0,471 | 0,025 | 3-Phytase inhibitor                      | 0,365 | 0,004 | Antihemorrhagic                    |
| 0,471 | 0,033 | Spasmolytic                              | 0,365 | 0,007 | Isoamylase inhibitor               |
| 0,470 | 0,009 | CYP2A3 substrate                         | 0,365 | 0,013 | Peptidyltransferase inhibitor      |
| 0,469 | 0,028 | Transcription factor STAT inhibitor      | 0,365 | 0,097 | Antipruritic, allergic             |
| 0,468 | 0,013 | UGT2B4 substrate                         | 0,364 | 0,002 | Selectin L antagonist              |
| 0,467 | 0,038 | Nicotine dehydrogenase inhibitor         | 0,364 | 0,088 | CYP2C substrate                    |
| 0,466 | 0,003 | Aldose reductase inhibitor               | 0,363 | 0,008 | Testosterone 17beta-dehydrogen     |
| 0,465 | 0,006 | CTGF expression inhibitor                | 0,363 | 0,017 | UGT1A10 substrate                  |
| 0,465 | 0,040 | Nucleotide metabolism regulator          | 0,363 | 0,028 | Prostate cancer treatment          |

|         |       |                                         |       |       |                                     |
|---------|-------|-----------------------------------------|-------|-------|-------------------------------------|
| 0,462   | 0,028 | Cis-1,2-dihydro-1,2-dihydroxynaphthal   | 0,362 | 0,009 | Antimycoplasmal                     |
| 0,461   | 0,083 | General pump inhibitor                  | 0,361 | 0,076 | Cholesterol antagonist              |
| 0,460   | 0,022 | CYP2E substrate                         | 0,359 | 0,009 | Lactoylglutathione lyase inhibitor  |
| 0,458   | 0,029 | Chemotherapeutic                        | 0,359 | 0,124 | CYP2C12 substrate                   |
| 0,458   | 0,093 | Phthalate 4,5-dioxygenase inhibitor     | 0,358 | 0,007 | CYP1B1 inhibitor                    |
| 0,456   | 0,004 | CYP1B1 substrate                        | 0,356 | 0,016 | Alcohol dehydrogenase (NADP+) i     |
| 0,456   | 0,059 | Antipruritic, allergic                  | 0,355 | 0,024 | Licheninase inhibitor               |
| 0,455   | 0,049 | CYP2C8 substrate                        | 0,355 | 0,029 | Glycine-tRNA ligase inhibitor       |
| 0,455   | 0,117 | Fusarinine-C ornithinesterase inhibitor | 0,355 | 0,095 | CYP2C8 substrate                    |
| 0,454   | 0,056 | Membrane integrity antagonist           | 0,354 | 0,004 | Glycosylceramidase inhibitor        |
| 0,451   | 0,003 | SULT1E1 substrate                       | 0,354 | 0,059 | Antiprotozoal (Trypanosoma)         |
| 0,451   | 0,120 | Glycosylphosphatidylinositol phospholi  | 0,352 | 0,005 | Antineoplastic antibiotic           |
| 0,450   | 0,026 | Sulfite oxidase inhibitor               | 0,352 | 0,021 | D-threo-aldose 1-dehydrogenase      |
| 0,447   | 0,005 | Antineoplastic (small cell lung cancer) | 0,349 | 0,002 | Aldose 1-epimerase inhibitor        |
| 0,447   | 0,052 | Linoleate diol synthase inhibitor       | 0,349 | 0,085 | Cyclic AMP phosphodiesterase inf    |
| 0,446   | 0,002 | Phosphoenolpyruvate carboxylase inhi    | 0,348 | 0,033 | Antitoxic                           |
| 0,446   | 0,014 | Antiprotozoal                           | 0,347 | 0,020 | Alcohol dehydrogenase [NAD(P)+]     |
| 0,444   | 0,031 | Menopausal disorders treatment          | 0,346 | 0,042 | Antiprotozoal (Amoeba)              |
| 0,444   | 0,041 | Antiallergic                            | 0,345 | 0,023 | RNA directed DNA polymerase inf     |
| 0,443   | 0,066 | Thromboxane B2 antagonist               | 0,345 | 0,072 | Fucoesterol-epoxide lyase inhibitor |
| 0,442   | 0,029 | Peptide alpha-N-acetyltransferase inhi  | 0,345 | 0,094 | CYP2C9 substrate                    |
| 0,439   | 0,018 | Non-steroidal antiinflammatory agent    | 0,344 | 0,014 | Antineoplastic (small cell lung can |
| 0,439   | 0,029 | P-benzoquinone reductase (NADPH) in     | 0,344 | 0,047 | CYP1A inhibitor                     |
| 0,437   | 0,134 | Calcium channel (voltage-sensitive) act | 0,343 | 0,074 | MMP9 expression inhibitor           |
| 0,436   | 0,004 | MAO inhibitor                           | 0,343 | 0,083 | CYP2A4 substrate                    |
| 7 0,436 | 0,037 | N-hydroxyarylamine O-acetyltransfera    | 0,343 | 0,151 | Antinociceptive                     |
| 0,436   | 0,072 | 1,4-Lactonase inhibitor                 | 0,342 | 0,015 | Laminaribiose phosphorylase inhi    |
| 0,435   | 0,005 | Alkaline phosphatase inhibitor          | 0,341 | 0,010 | Topoisomerase I inhibitor           |
| 0,435   | 0,020 | Quinoprotein glucose dehydrogenase i    | 0,341 | 0,010 | CYP19 inhibitor                     |
| 0,433   | 0,023 | CYP2E1 substrate                        | 0,336 | 0,013 | Glutathione S-transferase substra   |
| 0,432   | 0,017 | Prostate cancer treatment               | 0,336 | 0,029 | Dolichyl-phosphate beta-glucosylt   |
| 0,431   | 0,007 | P-glycoprotein inhibitor                | 0,335 | 0,024 | Glucan 1,4-beta-glucosidase inhib   |
| 0,428   | 0,017 | CYP2B11 substrate                       | 0,333 | 0,020 | Glycogen (starch) synthase inhibit  |
| 0,428   | 0,022 | Hydroxylamine reductase (NADH) inhi     | 0,331 | 0,027 | Choleretic                          |
| 0,428   | 0,039 | Caspase 8 stimulant                     | 0,331 | 0,073 | Dermatologic                        |
| 0,426   | 0,080 | Fructose 5-dehydrogenase inhibitor      | 0,329 | 0,023 | Vascular dementia treatment         |
| 0,425   | 0,067 | Sulfur reductase inhibitor              | 0,328 | 0,055 | CYP1A2 inhibitor                    |
| 0,425   | 0,144 | Pseudolysin inhibitor                   | 0,328 | 0,163 | Heat shock protein 27 antagonist    |
| 0,424   | 0,010 | Proto-oncogene tyrosine-protein kinas   | 0,327 | 0,009 | Beta-glucosidase inhibitor          |
| 0,421   | 0,034 | Antimycobacterial                       | 0,327 | 0,042 | DNA polymerase I inhibitor          |
| 0,420   | 0,026 | Antituberculosic                        | 0,325 | 0,188 | Fibrinolytic                        |
| 0,419   | 0,035 | NADPH-ferrihemoprotein reductase inl    | 0,324 | 0,018 | Cerebroside-sulfatase inhibitor     |
| 0,418   | 0,023 | Antileukemic                            | 0,323 | 0,007 | Gout treatment                      |
| 0,418   | 0,043 | Aryl-acylamidase inhibitor              | 0,323 | 0,067 | H+-transporting two-sector ATPas    |
| 0,417   | 0,001 | Fatty acid synthase inhibitor           | 0,323 | 0,080 | CYP2A substrate                     |
| 0,417   | 0,003 | SULT1A1 substrate                       | 0,322 | 0,027 | Alpha-amylase inhibitor             |
| 0,417   | 0,017 | Angiogenesis stimulant                  | 0,322 | 0,066 | Antipsoriatic                       |

|       |       |                                          |       |       |                                     |
|-------|-------|------------------------------------------|-------|-------|-------------------------------------|
| 0,417 | 0,113 | Protein-disulfide reductase (glutathion  | 0,321 | 0,011 | Neurotrophic factor enhancer        |
| 0,416 | 0,058 | 3-Hydroxybenzoate 6-monooxygenase        | 0,321 | 0,090 | Antihelmintic (Nematodes)           |
| 0,414 | 0,066 | CYP2D16 substrate                        | 0,319 | 0,004 | SMN2 expression enhancer            |
| 0,412 | 0,060 | Aspartate-phenylpyruvate transaminas     | 0,319 | 0,045 | Endopeptidase La inhibitor          |
| 0,410 | 0,055 | CYP2D6 substrate                         | 0,318 | 0,061 | Immunomodulator                     |
| 0,410 | 0,113 | Electron-transferring-flavoprotein deh   | 0,317 | 0,016 | Protein-synthesizing GTPase inhib   |
| 0,409 | 0,002 | NAD(P)H dehydrogenase (quinone) inh      | 0,315 | 0,070 | Nitrite reductase [NAD(P)H] inhibi  |
| 0,408 | 0,036 | Antiprotozoal (Trypanosoma)              | 0,313 | 0,036 | Adenosine regulator                 |
| 0,408 | 0,057 | Lactase inhibitor                        | 0,311 | 0,033 | Antiuremic                          |
| 0,407 | 0,005 | Lipoxygenase inhibitor                   | 0,311 | 0,085 | CYP17 inhibitor                     |
| 0,407 | 0,058 | Malate dehydrogenase (acceptor) inhib    | 0,310 | 0,049 | Levanase inhibitor                  |
| 0,406 | 0,094 | Lysase inhibitor                         | 0,307 | 0,010 | Estrone sulfotransferase inhibitor  |
| 0,405 | 0,016 | 3-Demethylubiquinone-9 3-O-methyltr      | 0,306 | 0,054 | Antineoplastic (pancreatic cancer)  |
| 0,404 | 0,044 | EIF4E expression inhibitor               | 0,304 | 0,023 | CYP1A1 inhibitor                    |
| 0,403 | 0,005 | MO15-related protein kinase Pfmrk inl    | 0,303 | 0,005 | 2-Dehydropantolactone reductase     |
| 0,403 | 0,008 | Phloroglucinol reductase inhibitor       | 0,301 | 0,036 | Anthranilate-CoA ligase inhibitor   |
| 0,403 | 0,046 | Antiviral (Influenza)                    | 0,299 | 0,016 | Sucrose-phosphate synthase inhibi   |
| 0,403 | 0,058 | Mannan endo-1,4-beta-mannosidase ir      | 0,299 | 0,020 | Ganglioside galactosyltransferase   |
| 0,399 | 0,004 | Sepiapterin reductase inhibitor          | 0,292 | 0,124 | Calcium regulator                   |
| 0,399 | 0,023 | Antiosteoporotic                         | 0,290 | 0,011 | Estrogen agonist                    |
| 0,398 | 0,006 | Laxative                                 | 0,290 | 0,017 | Cellulase inhibitor                 |
| 0,398 | 0,080 | Trimethylamine-oxide aldolase inhibitc   | 0,290 | 0,018 | Glycerol dehydrogenase (NADP+)      |
| 0,397 | 0,023 | Magnesium-protoporphyrin IX monom        | 0,290 | 0,030 | ATPase stimulant                    |
| 0,396 | 0,025 | Cytochrome P450 inhibitor                | 0,289 | 0,019 | Aldehyde dehydrogenase inhibito     |
| 0,396 | 0,095 | Carboxypeptidase Taq inhibitor           | 0,288 | 0,024 | Antineoplastic (melanoma)           |
| 0,395 | 0,054 | Mycothioli-S-conjugate amidase inhibi    | 0,287 | 0,014 | SULT1E1 substrate                   |
| 0,395 | 0,067 | Manganese peroxidase inhibitor           | 0,284 | 0,049 | Thyroxine 5-deiodinase inhibitor    |
| 0,395 | 0,090 | (R)-6-hydroxynicotine oxidase inhibitor  | 0,283 | 0,005 | Diacylglycerol kinase inhibitor     |
| 0,394 | 0,002 | Breast cancer-resistant protein inhibiti | 0,283 | 0,027 | Antineoplastic (lymphoma)           |
| 0,394 | 0,004 | Gout treatment                           | 0,283 | 0,044 | Lactose synthase inhibitor          |
| 0,393 | 0,008 | CYP2A10 substrate                        | 0,282 | 0,016 | CYP1B1 substrate                    |
| 0,393 | 0,012 | UGT2B28 substrate                        | 0,281 | 0,014 | Antineoplastic (squamous cell car   |
| 0,393 | 0,108 | Antidyskinetic                           | 0,280 | 0,026 | Expectorant                         |
| 0,392 | 0,059 | CYP2D substrate                          | 0,280 | 0,151 | JAK2 expression inhibitor           |
| 0,392 | 0,071 | Respiratory analeptic                    | 0,279 | 0,097 | Chitinase inhibitor                 |
| 0,391 | 0,032 | Salicylate 1-monooxygenase inhibitor     | 0,278 | 0,062 | Undecaprenyl-phosphate mannos       |
| 0,389 | 0,053 | GABA aminotransferase inhibitor          | 0,277 | 0,022 | CYP2A10 substrate                   |
| 0,389 | 0,099 | Leukopoiesis stimulant                   | 0,274 | 0,017 | Endo-1,4-beta-xylanase inhibitor    |
| 0,388 | 0,004 | Estradiol 17 beta dehydrogenase inhibi   | 0,274 | 0,140 | Glucan endo-1,6-beta-glucosidase    |
| 0,388 | 0,063 | Rubredoxin-NAD+ reductase inhibitor      | 0,273 | 0,082 | Undecaprenyldiphospho-muramo        |
| 0,388 | 0,090 | Alkenylglycerophosphocholine hydrola     | 0,272 | 0,005 | Radical formation agonist           |
| 0,387 | 0,011 | 2-Nitropropane dioxygenase inhibitor     | 0,272 | 0,013 | Topoisomerase II inhibitor          |
| 0,387 | 0,033 | Antibacterial                            | 0,271 | 0,023 | Antineoplastic (cervical cancer)    |
| 0,387 | 0,076 | 5 Hydroxytryptamine release stimulant    | 0,270 | 0,037 | Cellulose 1,4-beta-cellobiosidase i |
| 0,386 | 0,004 | Cystathionine beta-synthase inhibitor    | 0,270 | 0,155 | Ecdysone 20-monooxygenase inhi      |
| 0,386 | 0,004 | Dual specificity phosphatase 1 inhibito  | 0,266 | 0,043 | Antineoplastic (colorectal cancer)  |
| 0,386 | 0,053 | Arylsulfate sulfotransferase inhibitor   | 0,266 | 0,087 | Macrophage stimulant                |

|       |       |                                        |       |       |                                    |
|-------|-------|----------------------------------------|-------|-------|------------------------------------|
| 0,385 | 0,044 | Leukotriene-C4 synthase inhibitor      | 0,266 | 0,123 | Antineoplastic (multiple myeloma)  |
| 0,385 | 0,085 | CYP2D15 substrate                      | 0,265 | 0,089 | CYP2C11 substrate                  |
| 0,385 | 0,155 | Acute neurologic disorders treatment   | 0,264 | 0,029 | 1,4-Alpha-glucan branching enzym   |
| 0,384 | 0,104 | Octopamine antagonist                  | 0,263 | 0,027 | CYP1B substrate                    |
| 0,384 | 0,248 | Phobic disorders treatment             | 0,263 | 0,052 | Antiviral                          |
| 0,383 | 0,039 | Formate-dihydrofolate ligase inhibitor | 0,260 | 0,045 | N-acetyllactosaminide beta-1,3-N   |
| 0,383 | 0,133 | Macrophage colony stimulating factor   | 0,258 | 0,023 | DNA directed RNA polymerase inf    |
| 0,382 | 0,028 | Opioid kappa 3 receptor antagonist     | 0,258 | 0,130 | Antineoplastic (solid tumors)      |
| 0,381 | 0,035 | Antiparasitic                          | 0,257 | 0,028 | ATPase inhibitor                   |
| 0,380 | 0,016 | Vascular (periferal) disease treatment | 0,257 | 0,184 | Beta-adrenergic receptor kinase ii |
| 0,380 | 0,065 | Hydroxylamine oxidase inhibitor        | 0,257 | 0,184 | G-protein-coupled receptor kinase  |
| 0,380 | 0,173 | Nicotinic alpha4beta4 receptor agonist | 0,256 | 0,006 | Cytokine release inhibitor         |
| 0,379 | 0,024 | Myosin ATPase inhibitor                | 0,256 | 0,162 | Antipruritic                       |
| 0,379 | 0,034 | Threonine aldolase inhibitor           | 0,254 | 0,029 | Aryl-alcohol dehydrogenase (NAD    |
| 0,378 | 0,002 | Demethylsterigmatocystin 6-O-methyl    | 0,254 | 0,042 | Antineoplastic (colon cancer)      |
| 0,378 | 0,004 | Gastritis treatment                    | 0,253 | 0,016 | Transcription factor NF kappa B in |
| 0,377 | 0,046 | Retinoic acid metabolism inhibitor     | 0,252 | 0,055 | Antineoplastic (brain cancer)      |
| 0,376 | 0,040 | Dextranase inhibitor                   | 0,251 | 0,015 | Alpha,alpha-trehalase inhibitor    |
| 0,375 | 0,062 | FMO1 substrate                         | 0,250 | 0,047 | UGT2B7 substrate                   |
| 0,375 | 0,064 | Glycerol-3-phosphate oxidase inhibitor | 0,250 | 0,059 | Anthelmintic                       |
| 0,373 | 0,120 | Glucan endo-1,3-beta-D-glucosidase in  | 0,250 | 0,125 | Phosphoinositide 5-phosphatase i   |
| 0,372 | 0,004 | Cyclin-dependent kinase 6 inhibitor    | 0,250 | 0,222 | CDK9/cyclin T1 inhibitor           |
| 0,372 | 0,014 | Phenol 2-monooxygenase inhibitor       | 0,249 | 0,084 | CYP2B substrate                    |
| 0,372 | 0,033 | Clavamate synthase inhibitor           | 0,249 | 0,106 | CYP2A5 substrate                   |
| 0,372 | 0,065 | Gamma-guanidinobutyraldehyde dehy      | 0,248 | 0,240 | Glutamate-5-semialdehyde dehy      |
| 0,372 | 0,112 | Phosphatidylcholine-retinol O-acyltran | 0,248 | 0,247 | Gastrin inhibitor                  |
| 0,370 | 0,017 | CYP1A2 inducer                         | 0,247 | 0,012 | Creatine kinase inhibitor          |
| 0,370 | 0,034 | Hyponitrite reductase inhibitor        | 0,246 | 0,030 | Antineoplastic (sarcoma)           |
| 0,369 | 0,020 | RNA directed DNA polymerase inhibito   | 0,246 | 0,221 | Glycerol-3-phosphate oxidase inh   |
| 0,369 | 0,079 | Glucose oxidase inhibitor              | 0,245 | 0,017 | NADH dehydrogenase inhibitor       |
| 0,369 | 0,135 | Phospholipid-translocating ATPase inhi | 0,244 | 0,009 | Beta-fructofuranosidase inhibitor  |
| 0,368 | 0,005 | Catechol 1,2-dioxygenase inhibitor     | 0,244 | 0,040 | UGT1A3 substrate                   |
| 0,366 | 0,044 | CYP7 inhibitor                         | 0,243 | 0,064 | Transactivator transcription prote |
| 0,365 | 0,008 | Antiprotozoal (Plasmodium)             | 0,242 | 0,013 | Alpha-L-rhamnosidase inhibitor     |
| 0,364 | 0,013 | Anti-Helicobacter pylori               | 0,241 | 0,007 | Niemann-Pick C1-like 1 protein an  |
| 0,362 | 0,060 | Anthelmintic (Nematodes)               | 0,241 | 0,009 | Phosphogluconate dehydrogenasi     |
| 0,362 | 0,113 | Acylcarnitine hydrolase inhibitor      | 0,241 | 0,048 | Interleukin 10 agonist             |
| 0,362 | 0,137 | Antinociceptive                        | 0,240 | 0,004 | Galactosylceramidase inhibitor     |
| 0,361 | 0,022 | Antiuremic                             | 0,240 | 0,026 | Dual specificity phosphatase 1 inh |
| 0,361 | 0,031 | Linoleoyl-CoA desaturase inhibitor     | 0,236 | 0,107 | 4-Nitrophenylphosphatase inhibit   |
| 0,360 | 0,025 | Antitussive                            | 0,235 | 0,036 | Thrombolytic                       |
| 0,360 | 0,093 | Arginine 2-monooxygenase inhibitor     | 0,234 | 0,046 | P-glycoprotein inhibitor           |
| 0,360 | 0,211 | Polyporopepsin inhibitor               | 0,233 | 0,028 | Glucosyl transferase inhibitor     |
| 0,359 | 0,003 | Estradiol 17 beta dehydrogenase 2 inhi | 0,232 | 0,225 | Vasodilator, peripheral            |
| 0,359 | 0,106 | Antihypoxic                            | 0,231 | 0,025 | UGT2B18 substrate                  |
| 0,358 | 0,003 | MAO A inhibitor                        | 0,231 | 0,028 | Beta-mannosidase inhibitor         |
| 0,358 | 0,014 | Gentisate 1,2-dioxygenase inhibitor    | 0,229 | 0,009 | Pyruvate kinase inhibitor          |



|         |       |                                          |       |       |                                     |
|---------|-------|------------------------------------------|-------|-------|-------------------------------------|
| 0,358   | 0,020 | UGT2B7 substrate                         | 0,227 | 0,006 | Antibiotic Anthracycline-like       |
| 0,358   | 0,031 | Bone diseases treatment                  | 0,226 | 0,097 | UGT2B4 substrate                    |
| 0,358   | 0,062 | Glucan 1,4-alpha-maltotriohydrolase ir   | 0,225 | 0,001 | MAP-kinase-activated kinase 1 inf   |
| 0,358   | 0,131 | Limulus clotting factor B inhibitor      | 0,225 | 0,144 | Antiprotozoal (Coccidial)           |
| 0,357   | 0,034 | Indanol dehydrogenase inhibitor          | 0,223 | 0,021 | Riboflavin phosphotransferase inf   |
| 0,356   | 0,010 | Dual specificity phosphatase inhibitor   | 0,223 | 0,066 | Phosphatidylglycerophosphatase      |
| 0,356   | 0,022 | Photosensitizer                          | 0,221 | 0,098 | CYP3A4 inhibitor                    |
| 0,356   | 0,099 | Hydrogen dehydrogenase inhibitor         | 0,220 | 0,026 | Antineoplastic (carcinoma)          |
| 0,355   | 0,030 | Antineoplastic (lung cancer)             | 0,220 | 0,162 | Cystic fibrosis treatment           |
| 0,354   | 0,093 | Acetylgalactosaminyl-O-glycosyl-glycoç   | 0,218 | 0,008 | Cellobiose phosphorylase inhibito   |
| 0,354   | 0,105 | GST A substrate                          | 0,217 | 0,003 | Glucan 1,4-alpha-glucosidase inhi   |
| 0,354   | 0,116 | Alkylacetyllycerophosphatase inhibito    | 0,217 | 0,118 | ATP phosphoribosyltransferase in    |
| 0,352   | 0,012 | Glutathione S-transferase substrate      | 0,216 | 0,026 | Psychosexual dysfunction treatme    |
| 0,352   | 0,104 | Pterin deaminase inhibitor               | 0,215 | 0,126 | Chitosanase inhibitor               |
| 0,352   | 0,137 | Chloride peroxidase inhibitor            | 0,214 | 0,035 | Alpha-N-arabinofuranosidase inhi    |
| 0,351   | 0,017 | Mcl-1 antagonist                         | 0,210 | 0,033 | Iodide peroxidase inhibitor         |
| 0,351   | 0,026 | Dihydroxy-acid dehydratase inhibitor     | 0,209 | 0,113 | Transcription factor inhibitor      |
| 0,351   | 0,093 | CYP3A5 substrate                         | 0,209 | 0,168 | N-acylmannosamine kinase inhibi     |
| 0,351   | 0,109 | Vasodilator, peripheral                  | 0,209 | 0,177 | Antiallergic                        |
| 0,351   | 0,152 | Nicotinic alpha2beta2 receptor antago    | 0,208 | 0,035 | Antineoplastic (ovarian cancer)     |
| 0,350   | 0,022 | Vitamin-K-epoxide reductase (warfarin    | 0,205 | 0,088 | Antineoplastic enhancer             |
| 0,348   | 0,004 | HIV-1 integrase (3'-Processing) inhibito | 0,204 | 0,041 | Protein kinase stimulant            |
| 0,348   | 0,043 | Glycerol-3-phosphate dehydrogenase i     | 0,203 | 0,055 | Cerebrovascular disorders treatme   |
| 0,348   | 0,164 | Ompin inhibitor                          | 0,203 | 0,177 | CYP2B5 substrate                    |
| 0,347   | 0,081 | CYP3A3 substrate                         | 0,202 | 0,005 | Interleukin 12 agonist              |
| 0,347   | 0,126 | Venombin AB inhibitor                    | 0,202 | 0,021 | UDP-glucose 4-epimerase inhibito    |
| 0,346   | 0,013 | CYP2C8 inducer                           | 0,202 | 0,139 | Pancreatic ribonuclease inhibitor   |
| 0,345   | 0,002 | Enoyl-[acyl-carrier-protein] reductase ( | 0,201 | 0,004 | Selectin antagonist                 |
| 0,345   | 0,029 | Peroxidase substrate                     | 0,200 | 0,095 | Sclerosant                          |
| 0,345   | 0,033 | RNA synthesis inhibitor                  | 0,198 | 0,048 | CYP2C8 inducer                      |
| 8 0,344 | 0,088 | Immunosuppressant                        | 0,196 | 0,011 | MAP-kinase-activated kinase inhit   |
| 0,343   | 0,069 | Prostaglandin-A1 DELTA-isomerase inh     | 0,196 | 0,059 | Phenylacetate-CoA ligase inhibito   |
| 0,342   | 0,005 | Protein kinase stimulant                 | 0,196 | 0,135 | Anti-Helicobacter pylori            |
| 0,342   | 0,011 | UGT2B1 substrate                         | 0,195 | 0,007 | NOS3 expression enhancer            |
| 0,342   | 0,061 | tRNA-pseudouridine synthase I inhibito   | 0,195 | 0,131 | Antiprotozoal (Trichomonas)         |
| 0,341   | 0,025 | Glutaminase inhibitor                    | 0,193 | 0,065 | Growth stimulant                    |
| 0,341   | 0,282 | Nootropic                                | 0,193 | 0,087 | Antineoplastic (non-small cell lung |
| 0,340   | 0,056 | 4-Hydroxymandelate oxidase inhibitor     | 0,192 | 0,185 | Hydroxylamine reductase (NADH)      |
| 0,340   | 0,129 | Apyrase inhibitor                        | 0,191 | 0,034 | Chitin synthase inhibitor           |
| 0,339   | 0,008 | P-glycoprotein 1 inhibitor               | 0,191 | 0,189 | Peptide-N4-(N-acetyl-beta-glucos    |
| 0,339   | 0,108 | Pancreatic elastase inhibitor            | 0,188 | 0,010 | Glycoprotein-fucosylgalactoside a   |
| 0,339   | 0,111 | Neuropeptide Y4 antagonist               | 0,188 | 0,085 | Interleukin antagonist              |
| 0,337   | 0,006 | Antifibrinolytic                         | 0,184 | 0,004 | Protein 30S ribosomal subunit inh   |
| 0,337   | 0,032 | ICAM1 expression inhibitor               | 0,184 | 0,034 | Xylose isomerase inhibitor          |
| 0,336   | 0,014 | Antineoplastic (cervical cancer)         | 0,184 | 0,063 | IgA-specific metalloendopeptidas    |
| 0,336   | 0,062 | Vanilloid 1 agonist                      | 0,184 | 0,174 | Myosin ATPase inhibitor             |
| 0,336   | 0,088 | Cytochrome P450 stimulant                | 0,183 | 0,004 | Opioid mu 2 receptor antagonist     |

|       |       |                                                     |       |       |                                                         |
|-------|-------|-----------------------------------------------------|-------|-------|---------------------------------------------------------|
| 0,335 | 0,004 | HIV-1 integrase (Strand Transfer) inhibitor         | 0,182 | 0,052 | Galactokinase inhibitor                                 |
| 0,335 | 0,094 | Cyclic AMP phosphodiesterase inhibitor              | 0,182 | 0,089 | Mucolytic                                               |
| 0,334 | 0,010 | Transcription factor NF kappa B inhibitor           | 0,181 | 0,009 | Dextranucrase inhibitor                                 |
| 0,334 | 0,047 | Cardiovascular analeptic                            | 0,181 | 0,077 | Antirickettsial                                         |
| 0,333 | 0,046 | Corticosteroid side-chain-isomerase inhibitor       | 0,181 | 0,118 | Diuretic                                                |
| 0,332 | 0,012 | Cell wall biosynthesis inhibitor                    | 0,180 | 0,004 | Histone deacetylase SIRT2 stimulator                    |
| 0,332 | 0,062 | Nitrite reductase (NO-forming) inhibitor            | 0,177 | 0,087 | Protein-Npi-phosphohistidine-sugar transferase          |
| 0,331 | 0,054 | N-methylhydantoinase (ATP-hydrolysis) inhibitor     | 0,176 | 0,053 | Ethanolaminephosphotransferase                          |
| 0,331 | 0,088 | Antipruritic                                        | 0,176 | 0,064 | Antineoplastic (renal cancer)                           |
| 0,331 | 0,088 | Peptidoglycan glycosyltransferase inhibitor         | 0,176 | 0,125 | Histidinol dehydrogenase inhibitor                      |
| 0,329 | 0,100 | S-formylglutathione hydrolase inhibitor             | 0,175 | 0,022 | Phosphorylase b inhibitor                               |
| 0,328 | 0,004 | HIV-1 integrase inhibitor                           | 0,175 | 0,031 | Interferon antagonist                                   |
| 0,328 | 0,065 | Lysostaphin inhibitor                               | 0,175 | 0,039 | Protein-glycosylgalactosylhydroxylase                   |
| 0,328 | 0,098 | Amine dehydrogenase inhibitor                       | 0,175 | 0,086 | Nitrate reductase inhibitor                             |
| 0,327 | 0,011 | Topoisomerase I inhibitor                           | 0,173 | 0,031 | Dolichyl-phosphate beta-D-mannose 4-epimerase           |
| 0,327 | 0,018 | Transcription factor NF kappa A inhibitor           | 0,173 | 0,091 | 2-Enoate reductase inhibitor                            |
| 0,327 | 0,024 | MAP kinase kinase 4 inhibitor                       | 0,172 | 0,154 | Coccolysin inhibitor                                    |
| 0,327 | 0,110 | Dementia treatment                                  | 0,170 | 0,119 | Antihypotensive                                         |
| 0,327 | 0,127 | Spasmolytic, urinary                                | 0,169 | 0,038 | Antineoplastic (gastric cancer)                         |
| 0,325 | 0,038 | Antipyretic                                         | 0,168 | 0,017 | Antitreponemal                                          |
| 0,325 | 0,045 | Succinate-semialdehyde dehydrogenase inhibitor      | 0,168 | 0,076 | Sterol 3-beta-glycosyltransferase                       |
| 0,325 | 0,093 | Formaldehyde transketolase inhibitor                | 0,168 | 0,103 | Mucorpepsin inhibitor                                   |
| 0,325 | 0,095 | Analeptic                                           | 0,167 | 0,003 | Sucrose alpha-glucosidase inhibitor                     |
| 0,324 | 0,010 | Histidine decarboxylase inhibitor                   | 0,167 | 0,082 | Ca2+/calmodulin-dependent protein kinase II             |
| 0,324 | 0,013 | Keratolytic                                         | 0,166 | 0,111 | Alpha-N-acetylglucosaminidase inhibitor                 |
| 0,324 | 0,013 | Antineoplastic (sarcoma)                            | 0,165 | 0,004 | Fatty acid synthase inhibitor                           |
| 0,324 | 0,082 | Mucinaminylserine mucinaminidase inhibitor          | 0,165 | 0,007 | Protein 50S ribosomal subunit inhibitor                 |
| 0,324 | 0,153 | Erythropoiesis stimulant                            | 0,165 | 0,026 | Estrogen antagonist                                     |
| 0,323 | 0,041 | CYP2B10 substrate                                   | 0,165 | 0,054 | Alcohol dehydrogenase inhibitor                         |
| 0,323 | 0,054 | 4-Hydroxyphenylacetate 3-monooxygenase inhibitor    | 0,164 | 0,070 | Antineoplastic (glioma)                                 |
| 0,322 | 0,036 | Glycerol 2-dehydrogenase (NADP+) inhibitor          | 0,162 | 0,013 | Telomerase inhibitor                                    |
| 0,322 | 0,086 | Alkenylglycerophosphoethanolamine hydrolase         | 0,161 | 0,031 | Dry eye syndrome treatment                              |
| 0,322 | 0,111 | CYP4A11 substrate                                   | 0,160 | 0,109 | Antineoplastic (bladder cancer)                         |
| 0,321 | 0,004 | UGT2B20 substrate                                   | 0,160 | 0,126 | Antiprotozoal (Toxoplasma)                              |
| 0,321 | 0,083 | Antiulcerative                                      | 0,157 | 0,026 | Glycoprotein 3-alpha-L-fucosyltransferase               |
| 0,321 | 0,106 | Spermidine dehydrogenase inhibitor                  | 0,157 | 0,082 | 4-Hydroxybenzoate nonaprenyltransferase                 |
| 0,320 | 0,021 | CYP2B2 substrate                                    | 0,153 | 0,145 | Antineoplastic (glioblastoma multiforme)                |
| 0,320 | 0,056 | Antinephritic                                       | 0,152 | 0,028 | Cystathionine beta-synthase inhibitor                   |
| 0,319 | 0,038 | CDP-diacylglycerol-glycerol-3-phosphate transferase | 0,152 | 0,031 | Antineoplastic (uterine cancer)                         |
| 0,319 | 0,134 | Lysine 2,3-aminomutase inhibitor                    | 0,152 | 0,035 | Antineoplastic, alkylator                               |
| 0,317 | 0,011 | Protein phosphatase inhibitor                       | 0,152 | 0,040 | UDP-N-acetylglucosamine-dolichyl transferase            |
| 0,317 | 0,055 | Carbon-monoxide dehydrogenase inhibitor             | 0,152 | 0,078 | Pim-1 kinase inhibitor                                  |
| 0,317 | 0,120 | Dimethylargininase inhibitor                        | 0,151 | 0,015 | Mycodextranase inhibitor                                |
| 0,316 | 0,029 | Sweetener                                           | 0,151 | 0,042 | Glycosylphosphatidylinositol diacylglycerol transferase |
| 0,316 | 0,084 | CYP2C18 substrate                                   | 0,151 | 0,048 | Isovaleryl-CoA dehydrogenase inhibitor                  |
| 0,316 | 0,090 | Antiinfective                                       | 0,151 | 0,064 | Peristaltic stimulant                                   |
| 0,315 | 0,025 | Vomilenine glycosyltransferase inhibitor            | 0,149 | 0,112 | ADP-ribosylarginine hydrolase inhibitor                 |

|       |       |                                          |       |       |                                     |
|-------|-------|------------------------------------------|-------|-------|-------------------------------------|
| 0,315 | 0,030 | Prunasin beta-glucosidase inhibitor      | 0,148 | 0,011 | Beta galactosidase inhibitor        |
| 0,315 | 0,046 | Tyrosine 3 hydroxylase inhibitor         | 0,147 | 0,024 | Isomaltulose synthase inhibitor     |
| 0,314 | 0,010 | Guanosine-3',5'-bis(diphosphate) 3'-di   | 0,147 | 0,049 | Diacylglycerol cholinephosphotrai   |
| 0,314 | 0,060 | Para amino benzoic acid antagonist       | 0,147 | 0,083 | Myosin-light-chain-phosphatase ii   |
| 0,314 | 0,091 | L-glutamate oxidase inhibitor            | 0,146 | 0,040 | Heparan-alpha-glucosaminide N-a     |
| 0,313 | 0,024 | Apoptosis antagonist                     | 0,145 | 0,020 | Sucrose synthase inhibitor          |
| 0,313 | 0,039 | Tryptophan 2,3-dioxygenase inhibitor     | 0,143 | 0,009 | Alpha-1,6-mannosyl-glycoprotein     |
| 0,313 | 0,095 | Gluconate 5-dehydrogenase inhibitor      | 0,143 | 0,009 | 3-Oxoacyl-[acyl-carrier-protein] sy |
| 0,312 | 0,088 | Glyoxylate reductase inhibitor           | 0,142 | 0,004 | Galectin 3 antagonist               |
| 0,312 | 0,092 | (S)-6-hydroxynicotine oxidase inhibitor  | 0,142 | 0,078 | Inositol oxygenase inhibitor        |
| 0,312 | 0,102 | N-acetylneuraminate 7-O(or 9-O)-acet     | 0,140 | 0,017 | Amylo-alpha-1,6-glucosidase inhi    |
| 0,311 | 0,042 | CYP2C29 substrate                        | 0,140 | 0,028 | SULT1A3 substrate                   |
| 0,311 | 0,138 | Fibrolase inhibitor                      | 0,140 | 0,046 | Dihydropyrimidine dehydrogenas      |
| 0,310 | 0,028 | Fumarate reductase (NADH) inhibitor      | 0,139 | 0,126 | Nitric oxide scavenger              |
| 0,309 | 0,004 | Pim kinase inhibitor                     | 0,138 | 0,056 | Interferon gamma antagonist         |
| 0,309 | 0,010 | Protein-tyrosine phosphatase inhibitor   | 0,137 | 0,004 | Opioid mu 1 receptor antagonist     |
| 0,309 | 0,101 | Phenol O-methyltransferase inhibitor     | 0,137 | 0,047 | UDP-glucose-hexose-1-phosphate      |
| 0,308 | 0,011 | UGT2B18 substrate                        | 0,137 | 0,136 | UGT2B28 substrate                   |
| 0,308 | 0,044 | Carminative                              | 0,136 | 0,080 | Antidiabetic (type 1)               |
| 0,308 | 0,095 | Cyanoalanine nitrilase inhibitor         | 0,135 | 0,025 | Squalene epoxidase inhibitor        |
| 0,308 | 0,114 | Thymidylate 5'-phosphatase inhibitor     | 0,135 | 0,087 | VCAM1 expression inhibitor          |
| 0,308 | 0,118 | Cl--transporting ATPase inhibitor        | 0,135 | 0,112 | Paraoxonase substrate               |
| 0,307 | 0,004 | Hypoxia inducible factor 1 alpha inhibit | 0,134 | 0,045 | Antispirochetal                     |
| 0,307 | 0,072 | Antineoplastic (multiple myeloma)        | 0,134 | 0,050 | DNA directed DNA polymerase inf     |
| 0,307 | 0,096 | (R)-Pantolactone dehydrogenase (flavi    | 0,133 | 0,005 | Amylosucrase inhibitor              |
| 0,306 | 0,132 | Fragilysin inhibitor                     | 0,133 | 0,073 | Protein-tyrosine sulfotransferase   |
| 0,305 | 0,004 | Estrogen beta receptor agonist           | 0,132 | 0,017 | 12-Lipoxygenase inhibitor           |
| 0,304 | 0,077 | Phosphopantothenoylcysteine decarbc      | 0,131 | 0,017 | T cell inhibitor                    |
| 0,303 | 0,068 | Antiinflammatory, intestinal             | 0,131 | 0,026 | Galactosylgalactosylglucosylceran   |
| 0,303 | 0,108 | Malate oxidase inhibitor                 | 0,131 | 0,081 | Cholesterol synthesis inhibitor     |
| 0,302 | 0,002 | CYP26 inhibitor                          | 0,130 | 0,018 | Glycine receptor antagonist         |
| 0,302 | 0,061 | DNA polymerase I inhibitor               | 0,130 | 0,094 | Antiviral (HIV)                     |
| 0,302 | 0,063 | Skeletal muscle relaxant                 | 0,129 | 0,019 | NAD(P)H dehydrogenase (quinone      |
| 0,302 | 0,100 | Exoribonuclease II inhibitor             | 0,129 | 0,090 | Corticosteroid antagonist           |
| 0,301 | 0,082 | 3-Cyanoalanine hydratase inhibitor       | 0,127 | 0,020 | HIV-1 integrase inhibitor           |
| 0,300 | 0,041 | Protein-Npi-phosphohistidine-sugar ph    | 0,127 | 0,039 | Rhodopsin kinase inhibitor          |
| 0,299 | 0,024 | CYP2A6 inhibitor                         | 0,126 | 0,115 | Keratolytic                         |
| 0,299 | 0,110 | Muscular dystrophy treatment             | 0,125 | 0,031 | Interleukin 10 antagonist           |
| 0,298 | 0,019 | Phenylpyruvate decarboxylase inhibito    | 0,125 | 0,048 | Galactoside 2-alpha-L-fucosyltran   |
| 0,298 | 0,038 | Antihelmintic                            | 0,125 | 0,082 | Glycine receptor agonist            |
| 0,298 | 0,053 | Arylacetonitrilase inhibitor             | 0,125 | 0,116 | Serratia marcescens nuclease inhi   |
| 0,298 | 0,068 | Pyruvate decarboxylase inhibitor         | 0,124 | 0,019 | HIV-1 integrase (3'-Processing) inf |
| 0,298 | 0,116 | Sphinganine kinase inhibitor             | 0,123 | 0,019 | HIV-1 integrase (Strand Transfer) i |
| 0,296 | 0,018 | 3,4-Dihydroxy-9,10-secoandrosta-1,3,5    | 0,123 | 0,072 | Phospholipase inhibitor             |
| 0,295 | 0,049 | Steroid synthesis inhibitor              | 0,123 | 0,100 | Hexokinase inhibitor                |
| 0,295 | 0,078 | Chitosanase inhibitor                    | 0,121 | 0,110 | Phloroglucinol reductase inhibitor  |
| 0,295 | 0,113 | Tpr proteinase (Porphyromonas gingiv     | 0,121 | 0,117 | Diabetic retinopathy treatment      |

|       |       |                                             |       |       |                                              |
|-------|-------|---------------------------------------------|-------|-------|----------------------------------------------|
| 0,294 | 0,011 | Topoisomerase II inhibitor                  | 0,120 | 0,039 | 1,5-Anhydro-D-fructose reductase             |
| 0,294 | 0,025 | CYP2B1 substrate                            | 0,120 | 0,044 | Phosphofructokinase-1 inhibitor              |
| 0,294 | 0,046 | Ferredoxin hydrogenase inhibitor            | 0,120 | 0,062 | Glutamate release inhibitor                  |
| 0,294 | 0,086 | Methylenetetrahydrofolate reductase         | 0,118 | 0,034 | Sphingomyelinase inhibitor                   |
| 0,294 | 0,086 | Naphthalene 1,2-dioxygenase inhibitor       | 0,118 | 0,084 | Antithyroid 8                                |
| 0,294 | 0,086 | Ferredoxin-NAD+ reductase inhibitor         | 0,118 | 0,108 | 2-Acylglycerol O-acyltransferase ii          |
| 0,293 | 0,076 | Mannose isomerase inhibitor                 | 0,117 | 0,008 | 1,3-Beta-glucan synthase inhibitor           |
| 0,292 | 0,115 | Membrane permeability enhancer              | 0,117 | 0,083 | CYP19 substrate                              |
| 0,291 | 0,042 | D-amino-acid dehydrogenase inhibitor        | 0,115 | 0,026 | Gentamicin 2''-nucleotidyltransferase        |
| 0,291 | 0,152 | Antimyopathies                              | 0,115 | 0,077 | Mannose-6-phosphate isomerase                |
| 0,290 | 0,014 | Iduronate-2-sulfatase inhibitor             | 0,114 | 0,004 | Antibiotic Aminoglycoside-like               |
| 0,290 | 0,104 | Myc inhibitor                               | 0,114 | 0,093 | FMN reductase inhibitor                      |
| 0,289 | 0,016 | Neurotrophic factor enhancer                | 0,113 | 0,013 | Chalcone isomerase inhibitor                 |
| 0,289 | 0,112 | Cancer associated disorders treatment       | 0,113 | 0,033 | Antiviral (Trachoma)                         |
| 0,289 | 0,117 | Polyamine-transporting ATPase inhibitor     | 0,113 | 0,037 | Beta-amylase inhibitor                       |
| 0,288 | 0,004 | MAO B inhibitor                             | 0,112 | 0,073 | Fructose-2,6-bisphosphate 2-phosphate        |
| 0,288 | 0,010 | Biphenyl-2,3-diol 1,2-dioxygenase inhibitor | 0,111 | 0,041 | CDC25A inhibitor                             |
| 0,288 | 0,027 | (S)-3-hydroxyacid ester dehydrogenase       | 0,110 | 0,005 | Aldehyde dehydrogenase 1A2 inhibitor         |
| 0,288 | 0,034 | Malate dehydrogenase inhibitor              | 0,110 | 0,039 | Antifungal enhancer                          |
| 0,288 | 0,095 | Dolichyl-diphosphooligosaccharide-precursor | 0,110 | 0,044 | Ketohexokinase inhibitor                     |
| 0,288 | 0,247 | Heat shock protein 27 antagonist            | 0,109 | 0,077 | Galacturan 1,4-alpha-galacturonic acid       |
| 0,287 | 0,039 | Antineoplastic (colorectal cancer)          | 0,109 | 0,092 | UGT2B1 substrate                             |
| 0,287 | 0,174 | 2-Dehydropantoate 2-reductase inhibitor     | 0,108 | 0,008 | Lipase inhibitor                             |
| 0,286 | 0,005 | Antithyroid                                 | 0,107 | 0,029 | Inositol-3-phosphate synthase inhibitor      |
| 0,286 | 0,063 | NADH kinase inhibitor                       | 0,106 | 0,003 | Sodium/glucose cotransporter inhibitor       |
| 0,286 | 0,091 | Phosphatidylinositol diacylglycerol-lyase   | 0,106 | 0,027 | Alpha-L-fucosidase inhibitor                 |
| 0,286 | 0,121 | Histidine N-acetyltransferase inhibitor     | 0,106 | 0,028 | Alternansucrase inhibitor                    |
| 0,285 | 0,020 | Aldehyde dehydrogenase inhibitor            | 0,104 | 0,019 | DNA repair enzyme inhibitor                  |
| 0,285 | 0,042 | Antiperistaltic                             | 0,103 | 0,026 | Adenine nucleotide translocase inhibitor     |
| 0,285 | 0,095 | Nicotinate dehydrogenase inhibitor          | 0,103 | 0,084 | Poly(ADP-ribose) glycohydrolase inhibitor    |
| 0,284 | 0,162 | Cyclic AMP agonist                          | 0,102 | 0,018 | Alpha,alpha-phosphotrehalase inhibitor       |
| 0,283 | 0,061 | Fructan beta-fructosidase inhibitor         | 0,101 | 0,053 | Cyclin-dependent kinase 6 inhibitor          |
| 0,282 | 0,068 | Long-chain-aldehyde dehydrogenase inhibitor | 0,100 | 0,090 | Phospholipase A2 inhibitor                   |
| 0,282 | 0,074 | Monodehydroascorbate reductase (NADPH)      | 0,098 | 0,010 | Estrogen beta receptor agonist               |
| 0,282 | 0,084 | CYP4A substrate                             | 0,097 | 0,011 | UDP-N-acetylglucosamine-lysosomal            |
| 0,282 | 0,215 | Gastrin inhibitor                           | 0,097 | 0,068 | Glycerol-3-phosphate dehydrogenase           |
| 0,281 | 0,004 | Heat shock protein antagonist               | 0,096 | 0,065 | Triose-phosphate isomerase inhibitor         |
| 0,281 | 0,018 | UGT2B9 substrate                            | 0,095 | 0,033 | Alpha,alpha-trehalose-phosphate              |
| 0,281 | 0,021 | 2,5-Dihydroxypyridine 5,6-dioxygenase       | 0,095 | 0,067 | SULT1A1 substrate                            |
| 0,281 | 0,024 | Alkylator                                   | 0,095 | 0,089 | Demethylsterigmatocystin 6-O-methyl          |
| 0,281 | 0,081 | Inotropic                                   | 0,094 | 0,053 | Estrogen receptor beta antagonist            |
| 0,280 | 0,010 | Tubulin antagonist                          | 0,094 | 0,075 | Cholestenone 5alpha-reductase inhibitor      |
| 0,280 | 0,017 | Leukotriene synthesis inhibitor             | 0,094 | 0,083 | Globoside alpha-N-acetylgalactosaminase      |
| 0,279 | 0,039 | UGT2B17 substrate                           | 0,093 | 0,015 | Mannosyl-oligosaccharide glucosyltransferase |
| 0,279 | 0,078 | Cyclomaltodextrinase inhibitor              | 0,093 | 0,067 | Heat shock protein antagonist                |
| 0,279 | 0,098 | Chenodeoxycholytaurine hydrolase inhibitor  | 0,093 | 0,075 | Lysozyme inhibitor                           |
| 0,278 | 0,133 | Sulfite dehydrogenase inhibitor             | 0,093 | 0,077 | Glyceraldehyde-3-phosphate dehydrogenase     |

|       |       |                                       |       |       |                                      |
|-------|-------|---------------------------------------|-------|-------|--------------------------------------|
| 0,278 | 0,147 | Simian immunodeficiency virus protein | 0,092 | 0,003 | Sodium/glucose cotransporter 1 i     |
| 0,277 | 0,102 | Alcohol dehydrogenase (acceptor) inhi | 0,091 | 0,022 | Arabinogalactan endo-1,4-beta-ga     |
| 0,277 | 0,260 | CYP2C8 inhibitor                      | 0,091 | 0,023 | Procollagen glucosyltransferase ir   |
| 0,276 | 0,037 | Antineoplastic (colon cancer)         | 0,090 | 0,025 | Alpha,alpha-trehalose phosphoryl     |
| 0,276 | 0,079 | Cytochrome-b5 reductase inhibitor     | 0,089 | 0,019 | Estradiol 17 beta dehydrogenase      |
| 0,276 | 0,102 | Dermatologic                          | 0,089 | 0,023 | Glyceraldehyde-3-phosphate deh       |
| 0,275 | 0,012 | Psychosexual dysfunction treatment    | 0,089 | 0,077 | Glucan 1,3-beta-glucosidase inhi     |
| 0,275 | 0,036 | CYP2E1 inhibitor                      | 0,086 | 0,061 | UDP-N-acetylglucosamine 2-epim       |
| 0,275 | 0,179 | RNA-directed RNA polymerase inhibito  | 0,085 | 0,018 | Purinergic P2Y agonist               |
| 0,274 | 0,008 | Postmenopausal disorders treatment    | 0,084 | 0,070 | Astringent                           |
| 0,274 | 0,080 | Aspergillus nuclease S1 inhibitor     | 0,080 | 0,013 | Sucrose-phosphate phosphatase i      |
| 0,273 | 0,004 | Alpha glucosidase inhibitor           | 0,080 | 0,022 | Protein kinase A inhibitor           |
| 0,273 | 0,057 | Antidiabetic symptomatic              | 0,080 | 0,066 | Phosphorylase kinase inhibitor       |
| 0,272 | 0,086 | Venom exonuclease inhibitor           | 0,079 | 0,023 | Osmotic diuretic                     |
| 0,271 | 0,065 | Phospholipase C inhibitor             | 0,078 | 0,003 | Cyclomaltoedextrin glucanotransfe    |
| 0,271 | 0,069 | Muscle relaxant                       | 0,078 | 0,035 | MAO A inhibitor                      |
| 0,270 | 0,024 | Interleukin agonist                   | 0,075 | 0,007 | Na+ K+ transporting ATPase inhi      |
| 0,270 | 0,025 | Shikimate 5-dehydrogenase inhibitor   | 0,075 | 0,065 | Sterol 24-C-methyltransferase inh    |
| 0,270 | 0,043 | Phosphoenolpyruvate mutase inhibitor  | 0,073 | 0,035 | Alpha-mannosidase inhibitor          |
| 0,270 | 0,054 | TRPA1 agonist                         | 0,073 | 0,045 | Threonine-tRNA ligase inhibitor      |
| 0,270 | 0,056 | Sulfite reductase inhibitor           | 0,072 | 0,030 | Postmenopausal disorders treatm      |
| 0,270 | 0,111 | CYP2D2 inhibitor                      | 0,072 | 0,068 | Inositol-polyphosphate 5-phosph      |
| 0,270 | 0,145 | Cyclohexanone monooxygenase inhibito  | 0,071 | 0,015 | CDC25B inhibitor                     |
| 0,269 | 0,046 | Interleukin antagonist                | 0,071 | 0,040 | Inositol 1,4,5-triphosphate recept   |
| 0,268 | 0,042 | Antineoplastic (brain cancer)         | 0,070 | 0,034 | Alpha,alpha-trehalose phosphoryl     |
| 0,267 | 0,003 | VEGF expression inhibitor             | 0,069 | 0,013 | GDP-L-fucose synthase inhibitor      |
| 0,267 | 0,088 | Antineoplastic (pancreatic cancer)    | 0,067 | 0,025 | Glucan 1,3-alpha-glucosidase inhi    |
| 0,266 | 0,013 | Antihematotoxic                       | 0,066 | 0,043 | Steroid DELTA-isomerase inhibitor    |
| 0,266 | 0,070 | Gamma-glutamyltransferase inhibitor   | 0,065 | 0,003 | Sodium/glucose cotransporter 2 ii    |
| 0,266 | 0,099 | N-acylmannosamine kinase inhibitor    | 0,064 | 0,006 | Membrane-oligosaccharide glycer      |
| 0,265 | 0,005 | Estrogen alpha receptor agonist       | 0,064 | 0,028 | Selectin E antagonist                |
| 0,265 | 0,015 | Nitric oxide scavenger                | 0,063 | 0,004 | Cholesterol absorption inhibitor     |
| 0,265 | 0,071 | Hyaluronic acid agonist               | 0,063 | 0,029 | Estrogen alpha receptor agonist      |
| 0,265 | 0,114 | Methylamine-glutamate N-methyltran    | 0,062 | 0,038 | Mannosidase inhibitor                |
| 0,264 | 0,031 | Antineoplastic (melanoma)             | 0,061 | 0,010 | Enoyl-[acyl-carrier-protein] reduct  |
| 0,263 | 0,054 | CYP3A4 inhibitor                      | 0,061 | 0,026 | Eicosanoid agonist                   |
| 0,263 | 0,061 | Sorbitol-6-phosphate 2-dehydrogenase  | 0,060 | 0,037 | Adenosine deaminase inhibitor        |
| 0,263 | 0,072 | H+-exporting ATPase inhibitor         | 0,060 | 0,050 | Beta-1,4-mannosyl-glycoprotein 4     |
| 0,263 | 0,074 | Endothelial growth factor antagonist  | 0,060 | 0,058 | DNA intercalator                     |
| 0,263 | 0,098 | Isopenicillin-N epimerase inhibitor   | 0,057 | 0,006 | Mannokinase inhibitor                |
| 0,263 | 0,108 | Antiprotozoal (Amoeba)                | 0,057 | 0,028 | Purinergic receptor agonist          |
| 0,262 | 0,003 | 12-Lipoxygenase inhibitor             | 0,057 | 0,028 | Purinergic P2 agonist                |
| 0,262 | 0,015 | HIV-2 reverse transcriptase inhibitor | 0,057 | 0,033 | UGT2B20 substrate                    |
| 0,262 | 0,053 | Antiviral                             | 0,054 | 0,011 | Nucleoside transporters inhibitor    |
| 0,262 | 0,089 | Undecaprenyldiphospho-muramoylper     | 0,051 | 0,013 | Sucrose phosphorylase inhibitor      |
| 0,261 | 0,023 | Diphosphomevalonate decarboxylase i   | 0,051 | 0,045 | Estradiol 17 beta dehydrogenase      |
| 0,261 | 0,133 | Bilirubin oxidase inhibitor           | 0,048 | 0,004 | Translation initiation factor IF-2 a |

|       |       |                                                                     |       |       |                                     |
|-------|-------|---------------------------------------------------------------------|-------|-------|-------------------------------------|
| 0,260 | 0,023 | Alkene monooxygenase inhibitor                                      | 0,048 | 0,038 | Heparanase inhibitor                |
| 0,260 | 0,033 | Interleukin 6 antagonist                                            | 0,046 | 0,034 | Protein kinase C zeta inhibitor     |
| 0,260 | 0,069 | Taurocyamine kinase inhibitor                                       | 0,045 | 0,005 | ATPase (Mitochondrial F1F0) inhibi  |
| 0,260 | 0,069 | Opheline kinase inhibitor                                           | 0,045 | 0,011 | Alpha-1,3-mannosyl-glycoprotein     |
| 0,259 | 0,009 | SMN2 expression enhancer                                            | 0,045 | 0,022 | Pyrimidine antagonist               |
| 0,259 | 0,095 | Glutamine-phenylpyruvate transamina                                 | 0,044 | 0,006 | DNA gyrase inhibitor                |
| 0,259 | 0,111 | FMO3 substrate                                                      | 0,042 | 0,016 | Beta-Phosphoglucomutase inhibit     |
| 0,258 | 0,005 | 5-Lipoxygenase inhibitor                                            | 0,042 | 0,038 | Microtubule stabilization           |
| 0,258 | 0,116 | Uterine relaxant                                                    | 0,041 | 0,034 | Electron transport complex I inhibi |
| 0,257 | 0,027 | Viral entry inhibitor                                               | 0,040 | 0,010 | Beta glucosidase inhibitor          |
| 0,257 | 0,101 | Antiprotozoal (Coccidial)                                           | 0,040 | 0,023 | Fucokinase inhibitor                |
| 0,256 | 0,089 | Arylmalonate decarboxylase inhibitor                                | 0,040 | 0,040 | Neuraminidase inhibitor             |
| 0,256 | 0,095 | Opioid dependency treatment                                         | 0,036 | 0,019 | Purinergic P2X4 antagonist          |
| 0,256 | 0,145 | Mitochondrial processing peptidase inf                              | 0,034 | 0,008 | Antibiotic Macrolide-like           |
| 0,255 | 0,038 | Arylsulfatase inhibitor                                             | 0,034 | 0,027 | 6-Phospho-beta-glucosidase inhib    |
| 0,255 | 0,042 | Tauropine dehydrogenase inhibitor                                   | 0,033 | 0,026 | Dopamine precursors                 |
| 0,255 | 0,043 | 3-Hydroxy-4-oxoquinoline 2,4-dioxyge                                | 0,025 | 0,011 | Motilin receptor agonist            |
| 0,255 | 0,072 | 5 Hydroxytryptamine 2B agonist                                      | 0,023 | 0,023 | Phosphogluconate 2-dehydrogen       |
| 0,254 | 0,070 | Glutathione dehydrogenase (ascorbate                                | 0,020 | 0,012 | dTDP-glucose 4,6-dehydratase inf    |
| 0,254 | 0,087 | Antitoxic                                                           | 0,019 | 0,017 | GDP-mannose 4,6-dehydratase in      |
| 0,254 | 0,090 | ATP phosphoribosyltransferase inhibit                               | 0,014 | 0,005 | Phospho-N-acetylmuramoyl-pent       |
| 0,254 | 0,165 | Transcription factor NF kappa B stimul                              | 0,014 | 0,012 | N-acetylgalactosamine-4-sulfatas    |
| 0,254 | 0,165 | Transcription factor stimulant                                      | 0,013 | 0,008 | Macrocin O-methyltransferase inf    |
| 0,253 | 0,014 | Phenylacetaldehyde dehydrogenase inhibitor                          |       |       |                                     |
| 0,253 | 0,028 | Anthranilate 3-monooxygenase (deaminating) inhibitor                |       |       |                                     |
| 0,253 | 0,060 | Di-trans,poly-cis-decaprenylcistransferase inhibitor                |       |       |                                     |
| 0,253 | 0,118 | Creatininase inhibitor                                              |       |       |                                     |
| 0,252 | 0,009 | Protein kinase (CK2) inhibitor                                      |       |       |                                     |
| 0,252 | 0,033 | Cholesterol synthesis inhibitor                                     |       |       |                                     |
| 0,251 | 0,033 | Uric acid excretion stimulant                                       |       |       |                                     |
| 0,251 | 0,040 | Cyclooxygenase substrate                                            |       |       |                                     |
| 0,251 | 0,080 | Methane monooxygenase inhibitor                                     |       |       |                                     |
| 0,251 | 0,080 | Glucan 1,4-alpha-maltotetraohydrolase inhibitor                     |       |       |                                     |
| 0,250 | 0,072 | Gestagen antagonist                                                 |       |       |                                     |
| 0,250 | 0,182 | Botulin neurotoxin A light chain inhibitor                          |       |       |                                     |
| 0,250 | 0,185 | Biotinidase inhibitor                                               |       |       |                                     |
| 0,249 | 0,127 | 4-Hydroxyproline epimerase inhibitor                                |       |       |                                     |
| 0,248 | 0,025 | Phenylalanine decarboxylase inhibitor                               |       |       |                                     |
| 0,248 | 0,037 | Antihelmintic (Fasciola)                                            |       |       |                                     |
| 0,248 | 0,095 | Phosphatidylserine decarboxylase inhibitor                          |       |       |                                     |
| 0,248 | 0,118 | Peptide-N4-(N-acetyl-beta-glucosaminyl)asparagine amidase inhibitor |       |       |                                     |
| 0,248 | 0,125 | Adenylyl-sulfate reductase inhibitor                                |       |       |                                     |
| 0,247 | 0,081 | Adrenaline release stimulant                                        |       |       |                                     |
| 0,247 | 0,096 | Pullulanase inhibitor                                               |       |       |                                     |
| 0,246 | 0,109 | ADP-thymidine kinase inhibitor                                      |       |       |                                     |
| 0,246 | 0,129 | Phosphoinositide 5-phosphatase inhibitor                            |       |       |                                     |
| 0,245 | 0,039 | Lactaldehyde reductase inhibitor                                    |       |       |                                     |

|       |       |                                                                       |
|-------|-------|-----------------------------------------------------------------------|
| 0,245 | 0,058 | 2-Oxoaldehyde dehydrogenase (NADP+) inhibitor                         |
| 0,245 | 0,089 | Glycolate dehydrogenase inhibitor                                     |
| 0,245 | 0,108 | N-formylmethionyl-peptidase inhibitor                                 |
| 0,244 | 0,004 | 3-Dehydroquinase synthase inhibitor                                   |
| 0,244 | 0,021 | Isoquinoline 1-oxidoreductase inhibitor                               |
| 0,244 | 0,032 | UGT1A5 substrate                                                      |
| 0,244 | 0,033 | Paraoxonase substrate                                                 |
| 0,243 | 0,037 | N6-methyl-lysine oxidase inhibitor                                    |
| 0,243 | 0,191 | HMGCS2 expression enhancer                                            |
| 0,242 | 0,020 | Thioredoxin reductase inhibitor                                       |
| 0,242 | 0,036 | L-amino-acid oxidase inhibitor                                        |
| 0,242 | 0,127 | Antisecretoric                                                        |
| 0,242 | 0,187 | Centromere associated protein inhibitor                               |
| 0,241 | 0,074 | Antiprotozoal (Trichomonas)                                           |
| 0,240 | 0,152 | Acetylcholinesterase inhibitor                                        |
| 0,239 | 0,198 | Leukopoiesis inhibitor                                                |
| 0,238 | 0,098 | Prostaglandin-E2 9-reductase inhibitor                                |
| 0,238 | 0,113 | N-benzoyloxycarbonylglycine hydrolase inhibitor                       |
| 0,238 | 0,166 | Loop diuretic                                                         |
| 0,237 | 0,011 | CYP1A3 substrate                                                      |
| 0,237 | 0,056 | Antineoplastic enhancer                                               |
| 0,237 | 0,140 | Hypolipemic                                                           |
| 0,237 | 0,155 | Antineoplastic (solid tumors)                                         |
| 0,237 | 0,209 | Na <sup>+</sup> -transporting two-sector ATPase inhibitor             |
| 0,235 | 0,017 | Adrenergic, ophthalmic                                                |
| 0,235 | 0,063 | Horrilysin inhibitor                                                  |
| 0,234 | 0,109 | Aldehyde dehydrogenase (pyrroloquinoline-quinone) inhibitor           |
| 0,233 | 0,011 | CYP2B4 substrate                                                      |
| 0,233 | 0,076 | Mepriin B inhibitor                                                   |
| 0,233 | 0,080 | Uroporphyrinogen-III synthase inhibitor                               |
| 0,232 | 0,070 | Aminomuconate-semialdehyde dehydrogenase inhibitor                    |
| 0,232 | 0,084 | S-alkylcysteine lyase inhibitor                                       |
| 0,231 | 0,016 | Huntington's disease treatment                                        |
| 0,231 | 0,061 | GABA C receptor agonist                                               |
| 0,231 | 0,069 | Antipruritic, non-allergic                                            |
| 0,231 | 0,084 | Gluconolactonase inhibitor                                            |
| 0,230 | 0,020 | Diiodophenylpyruvate reductase inhibitor                              |
| 0,230 | 0,023 | Cyclooxygenase 1 inhibitor                                            |
| 0,230 | 0,030 | Hippurate hydrolase inhibitor                                         |
| 0,230 | 0,044 | Maltose-transporting ATPase inhibitor                                 |
| 0,230 | 0,077 | Benzaldehyde dehydrogenase (NADP+) inhibitor                          |
| 0,230 | 0,082 | Lactose synthase inhibitor                                            |
| 0,230 | 0,132 | Fucosterol-epoxide lyase inhibitor                                    |
| 0,229 | 0,048 | Histone acetyltransferase inhibitor                                   |
| 0,229 | 0,078 | Cyclohexyl-isocyanide hydratase inhibitor                             |
| 0,229 | 0,081 | Nucleoside oxidase (H <sub>2</sub> O <sub>2</sub> -forming) inhibitor |
| 0,228 | 0,070 | Shikimate O-hydroxycinnamoyltransferase inhibitor                     |

|       |       |                                                                              |
|-------|-------|------------------------------------------------------------------------------|
| 0,228 | 0,075 | Bothrolysin inhibitor                                                        |
| 0,228 | 0,129 | DNA-(apurinic or apyrimidinic site) lyase inhibitor                          |
| 0,227 | 0,185 | Endopeptidase So inhibitor                                                   |
| 0,226 | 0,031 | Antineoplastic (ovarian cancer)                                              |
| 0,226 | 0,045 | CYP4F2 substrate                                                             |
| 0,226 | 0,107 | 2-Hydroxyomuconate-semialdehyde hydrolase inhibitor                          |
| 0,225 | 0,022 | Cytochrome-b5 reductase substrate                                            |
| 0,225 | 0,067 | Acyl-CoA oxidase inhibitor                                                   |
| 0,225 | 0,069 | O-aminophenol oxidase inhibitor                                              |
| 0,225 | 0,078 | Thiopurine S-methyltransferase inhibitor                                     |
| 0,225 | 0,112 | Flavin-containing monooxygenase substrate                                    |
| 0,224 | 0,006 | MAP-kinase-activated kinase inhibitor                                        |
| 0,224 | 0,029 | DNA directed RNA polymerase inhibitor                                        |
| 0,224 | 0,035 | Deoxyribonuclease I inhibitor                                                |
| 0,224 | 0,042 | Antineoplastic (lymphoma)                                                    |
| 0,224 | 0,051 | 2,4-Dichlorophenol 6-monooxygenase inhibitor                                 |
| 0,224 | 0,108 | 2-Haloacid dehalogenase inhibitor                                            |
| 0,224 | 0,149 | All-trans-retinyl-palmitate hydrolase inhibitor                              |
| 0,223 | 0,010 | Protein-tyrosine phosphatase 1B inhibitor                                    |
| 0,223 | 0,046 | Thrombolytic                                                                 |
| 0,223 | 0,213 | Lysyl oxidase inhibitor                                                      |
| 0,222 | 0,039 | Aldehyde dehydrogenase 2 substrate                                           |
| 0,222 | 0,110 | Thiamine-triphosphatase inhibitor                                            |
| 0,222 | 0,133 | Glutamate-tRNA ligase inhibitor                                              |
| 0,222 | 0,157 | Cystic fibrosis treatment                                                    |
| 0,220 | 0,020 | Antineoplastic (glioma)                                                      |
| 0,219 | 0,071 | 2-Hydroxy-3-oxoadipate synthase inhibitor                                    |
| 0,219 | 0,077 | N-hydroxy-2-acetamidofluorene reductase inhibitor                            |
| 0,219 | 0,080 | Bisphosphoglycerate phosphatase inhibitor                                    |
| 0,219 | 0,205 | Superoxide dismutase inhibitor                                               |
| 0,218 | 0,002 | Transcription factor STAT6 inhibitor                                         |
| 0,218 | 0,014 | 2-Pyrocatechuate decarboxylase inhibitor                                     |
| 0,218 | 0,080 | 2,3,4,5-Tetrahydropyridine-2,6-dicarboxylate N-succinyltransferase inhibitor |
| 0,218 | 0,162 | Pyroglutamyl-peptidase II inhibitor                                          |
| 0,217 | 0,041 | Laminaribiose phosphorylase inhibitor                                        |
| 0,217 | 0,045 | UGT2B10 substrate                                                            |
| 0,217 | 0,075 | Diuretic                                                                     |
| 0,216 | 0,008 | CYP19 substrate                                                              |
| 0,216 | 0,082 | Sclerosant                                                                   |
| 0,216 | 0,084 | Methanol dehydrogenase inhibitor                                             |
| 0,216 | 0,122 | Adenomatous polyposis treatment                                              |
| 0,216 | 0,131 | Thiamine pyridinylase inhibitor                                              |
| 0,216 | 0,150 | Aldosterone antagonist                                                       |
| 0,216 | 0,173 | CYP2A8 substrate                                                             |
| 0,215 | 0,026 | Cyclooxygenase inhibitor                                                     |
| 0,215 | 0,036 | 3-Hydroxyphenylacetate 6-hydroxylase inhibitor                               |
| 0,215 | 0,089 | Dopamine release stimulant                                                   |



|       |       |                                                           |
|-------|-------|-----------------------------------------------------------|
| 0,215 | 0,119 | Transketolase inhibitor                                   |
| 0,214 | 0,022 | Procollagen-lysine 5-dioxygenase inhibitor                |
| 0,214 | 0,082 | Hydroxylamine reductase inhibitor                         |
| 0,214 | 0,150 | Urethanase inhibitor                                      |
| 0,213 | 0,014 | Amyloid beta aggregation inhibitor                        |
| 0,213 | 0,058 | Nitrate reductase inhibitor                               |
| 0,213 | 0,059 | Blasticidin-S deaminase inhibitor                         |
| 0,213 | 0,102 | Poly(beta-D-mannuronate) lyase inhibitor                  |
| 0,212 | 0,062 | Mannitol-1-phosphatase inhibitor                          |
| 0,212 | 0,081 | Pappalysin-1 inhibitor                                    |
| 0,212 | 0,100 | Acetylserotonin O-methyltransferase inhibitor             |
| 0,211 | 0,083 | Histidinol-phosphatase inhibitor                          |
| 0,210 | 0,017 | Oligo-1,6-glucosidase inhibitor                           |
| 0,210 | 0,068 | N-Acyl-D-aspartate deacylase inhibitor                    |
| 0,210 | 0,069 | Crotonoyl-[acyl-carrier-protein] hydratase inhibitor      |
| 0,210 | 0,155 | D-lactaldehyde dehydrogenase inhibitor                    |
| 0,209 | 0,069 | 15-Hydroxyprostaglandin-D dehydrogenase (NADP+) inhibitor |
| 0,209 | 0,087 | Gamma-D-Glutamyl-meso-diaminopimelate peptidase inhibitor |
| 0,208 | 0,087 | Dimethylmaleate hydratase inhibitor                       |
| 0,208 | 0,165 | Thiosulfate dehydrogenase inhibitor                       |
| 0,207 | 0,057 | 3-Hydroxybenzoate 4-monooxygenase inhibitor               |
| 0,207 | 0,078 | Polarisation inhibitor                                    |
| 0,207 | 0,082 | Aromatic-hydroxylamine O-acetyltransferase inhibitor      |
| 0,207 | 0,100 | Thiol oxidase inhibitor                                   |
| 0,207 | 0,156 | 3C-like protease (Human coronavirus) inhibitor            |
| 0,207 | 0,198 | Antithrombotic                                            |
| 0,205 | 0,004 | Histone deacetylase stimulant                             |
| 0,205 | 0,004 | Histone deacetylase SIRT1 stimulant                       |
| 0,205 | 0,056 | Penicillin amidase inhibitor                              |
| 0,205 | 0,071 | ATPase inhibitor                                          |
| 0,204 | 0,028 | Catalase stimulant                                        |
| 0,204 | 0,054 | Laccase inhibitor                                         |
| 0,204 | 0,081 | Lipoprotein lipase stimulant                              |
| 0,203 | 0,101 | [acyl-carrier-protein] S-acetyltransferase inhibitor      |
| 0,202 | 0,010 | Antineoplastic (uterine cancer)                           |
| 0,202 | 0,011 | Glutathione reductase inhibitor                           |
| 0,202 | 0,079 | Ubiquitin thiolesterase inhibitor                         |
| 0,201 | 0,045 | Antineoplastic (bladder cancer)                           |
| 0,201 | 0,103 | Aspartate-ammonia ligase inhibitor                        |
| 0,200 | 0,009 | Macrophage migration inhibitory factor inhibitor          |
| 0,200 | 0,012 | Vitamin                                                   |
| 0,200 | 0,062 | Styrene-oxide isomerase inhibitor                         |
| 0,199 | 0,143 | Albendazole monooxygenase inhibitor                       |
| 0,199 | 0,150 | Chloride channel blocker                                  |
| 0,198 | 0,055 | Lipoxygenase substrate                                    |
| 0,198 | 0,065 | Sedoheptulose-bisphosphatase inhibitor                    |
| 0,198 | 0,067 | Homoaconitate hydratase inhibitor                         |

|       |       |                                                     |
|-------|-------|-----------------------------------------------------|
| 0,198 | 0,067 | 6-Carboxyhexanoate-CoA ligase inhibitor             |
| 0,198 | 0,067 | Triacetate-lactonase inhibitor                      |
| 0,198 | 0,067 | Biotin-CoA ligase inhibitor                         |
| 0,198 | 0,112 | Polyribonucleotide nucleotidyltransferase inhibitor |
| 0,198 | 0,119 | Arylesterase inhibitor                              |
| 0,197 | 0,007 | NOS3 expression enhancer                            |
| 0,197 | 0,016 | 6-Methylsalicylate decarboxylase inhibitor          |
| 0,197 | 0,049 | Cerebroside-sulfatase inhibitor                     |
| 0,197 | 0,066 | Rhamnulose-1-phosphate aldolase inhibitor           |
| 0,197 | 0,082 | Antineoplastic (non-small cell lung cancer)         |
| 0,197 | 0,119 | Coccolysin inhibitor                                |
| 0,196 | 0,029 | Homogentisate 1,2-dioxygenase inhibitor             |
| 0,196 | 0,035 | 4-Phytase inhibitor                                 |
| 0,196 | 0,061 | Arachidonic acid antagonist                         |
| 0,196 | 0,064 | Guanidinoacetase inhibitor                          |
| 0,196 | 0,101 | Urease inhibitor                                    |
| 0,196 | 0,140 | IgA-specific serine endopeptidase inhibitor         |
| 0,195 | 0,012 | Protocatechuate 3,4-dioxygenase inhibitor           |
| 0,195 | 0,019 | Antidiabetic (type 1)                               |
| 0,195 | 0,023 | Antineoplastic (squamous cell carcinoma)            |
| 0,195 | 0,041 | CYP2B18 substrate                                   |
| 0,195 | 0,167 | Methylumbelliferyl-acetate deacetylase inhibitor    |
| 0,194 | 0,027 | Alcohol oxidase inhibitor                           |
| 0,194 | 0,045 | Glycerol-1-phosphatase inhibitor                    |
| 0,194 | 0,046 | Aryl-alcohol dehydrogenase (NADP+) inhibitor        |
| 0,194 | 0,065 | Leucine dehydrogenase inhibitor                     |
| 0,194 | 0,085 | Levanase inhibitor                                  |
| 0,194 | 0,125 | L-threonine 3-dehydrogenase inhibitor               |
| 0,193 | 0,072 | Tropinesterase inhibitor                            |
| 0,192 | 0,023 | 4,5-Dihydroxyphthalate decarboxylase inhibitor      |
| 0,192 | 0,046 | Antineoplastic (renal cancer)                       |
| 0,192 | 0,058 | Gamma-butyrobetaine dioxygenase inhibitor           |
| 0,191 | 0,149 | CYP2C9 inhibitor                                    |
| 0,190 | 0,063 | Erectile dysfunction treatment                      |
| 0,190 | 0,082 | Anticataract                                        |
| 0,189 | 0,050 | Tumour necrosis factor antagonist                   |
| 0,189 | 0,066 | CYP2D1 substrate                                    |
| 0,189 | 0,084 | Expectorant                                         |
| 0,189 | 0,182 | DNA synthesis inhibitor                             |
| 0,188 | 0,004 | Dynamin GTPase inhibitor                            |
| 0,188 | 0,018 | Azobenzene reductase inhibitor                      |
| 0,188 | 0,043 | Contraceptive female                                |
| 0,188 | 0,071 | Ferredoxin-nitrite reductase inhibitor              |
| 0,188 | 0,081 | D-threo-aldose 1-dehydrogenase inhibitor            |
| 0,188 | 0,103 | Pseudouridylate synthase inhibitor                  |
| 0,187 | 0,031 | HCV NS3-helicase inhibitor                          |
| 0,187 | 0,084 | Glutarate-semialdehyde dehydrogenase inhibitor      |

|       |       |                                                             |
|-------|-------|-------------------------------------------------------------|
| 0,187 | 0,137 | Oxytocic                                                    |
| 0,186 | 0,069 | Aureolysin inhibitor                                        |
| 0,186 | 0,077 | D-alanine 2-hydroxymethyltransferase inhibitor              |
| 0,186 | 0,082 | Polygalacturonase inhibitor                                 |
| 0,186 | 0,163 | Antipsoriatic                                               |
| 0,185 | 0,012 | Cytokine release inhibitor                                  |
| 0,185 | 0,094 | Alpha-N-acetylglucosaminidase inhibitor                     |
| 0,185 | 0,145 | Acidifying agent non gastric                                |
| 0,184 | 0,005 | Heat shock protein 90 antagonist                            |
| 0,184 | 0,035 | Antineoplastic (carcinoma)                                  |
| 0,184 | 0,047 | Tryptophan alpha,beta-oxidase inhibitor                     |
| 0,184 | 0,067 | Creatinine deaminase inhibitor                              |
| 0,184 | 0,084 | Antineoplastic (glioblastoma multiforme)                    |
| 0,184 | 0,093 | Cutinase inhibitor                                          |
| 0,184 | 0,145 | Dipeptidase E inhibitor                                     |
| 0,183 | 0,115 | Thiol protease inhibitor                                    |
| 0,183 | 0,132 | Dactylisin inhibitor                                        |
| 0,182 | 0,046 | Acylphosphatase inhibitor                                   |
| 0,182 | 0,056 | Trans-pentaprenyltranstransferase inhibitor                 |
| 0,182 | 0,063 | Benzoate 4-monooxygenase inhibitor                          |
| 0,182 | 0,102 | Peptidyl-dipeptidase B inhibitor                            |
| 0,182 | 0,120 | Alcohol dehydrogenase [NAD(P)+] inhibitor                   |
| 0,181 | 0,093 | Ribonucleoside triphosphate reductase inhibitor             |
| 0,181 | 0,111 | Indolepyruvate C-methyltransferase inhibitor                |
| 0,181 | 0,126 | Vanilloid agonist                                           |
| 0,180 | 0,010 | CDC25A inhibitor                                            |
| 0,180 | 0,023 | Antineoplastic antibiotic                                   |
| 0,180 | 0,028 | Radical formation agonist                                   |
| 0,180 | 0,046 | Alcohol dehydrogenase inhibitor                             |
| 0,180 | 0,054 | 2-Oxoglutarate decarboxylase inhibitor                      |
| 0,180 | 0,094 | Hydroxysteroid dehydrogenase inhibitor                      |
| 0,179 | 0,049 | Endo-1,3(4)-beta-glucanase inhibitor                        |
| 0,179 | 0,147 | DNA-3-methyladenine glycosylase I inhibitor                 |
| 0,178 | 0,063 | Lombricine kinase inhibitor                                 |
| 0,178 | 0,095 | Mucolytic                                                   |
| 0,178 | 0,113 | Nav1.5 sodium channel blocker                               |
| 0,177 | 0,090 | Alkylglycerophosphoethanolamine phosphodiesterase inhibitor |
| 0,177 | 0,137 | Ethanolamine-phosphate cytidyltransferase inhibitor         |
| 0,176 | 0,015 | Dry eye syndrome treatment                                  |
| 0,176 | 0,059 | Glucan 1,4-beta-glucosidase inhibitor                       |
| 0,176 | 0,064 | Aryldialkylphosphatase inhibitor                            |
| 0,176 | 0,066 | Trans-2-enoyl-CoA reductase (NAD+) inhibitor                |
| 0,176 | 0,066 | Pyruvate dehydrogenase (cytochrome) inhibitor               |
| 0,176 | 0,100 | Bone formation stimulant                                    |
| 0,175 | 0,026 | Coagulant                                                   |
| 0,175 | 0,107 | Antihypotensive                                             |
| 0,175 | 0,116 | Oryzin inhibitor                                            |

|       |       |                                                                                  |
|-------|-------|----------------------------------------------------------------------------------|
| 0,175 | 0,130 | Yeast ribonuclease inhibitor                                                     |
| 0,175 | 0,135 | Prolyl aminopeptidase inhibitor                                                  |
| 0,174 | 0,008 | 4-Hydroxybenzoate decarboxylase inhibitor                                        |
| 0,174 | 0,020 | 3-Oxosteroid 1-dehydrogenase inhibitor                                           |
| 0,174 | 0,033 | Serum-glucocorticoid regulated kinase inhibitor                                  |
| 0,174 | 0,040 | Contraceptive                                                                    |
| 0,174 | 0,073 | L-glucuronate reductase inhibitor                                                |
| 0,174 | 0,103 | Xylan endo-1,3-beta-xylosidase inhibitor                                         |
| 0,174 | 0,146 | Taurine-2-oxoglutarate transaminase inhibitor                                    |
| 0,173 | 0,005 | Squalene epoxidase inhibitor                                                     |
| 0,173 | 0,011 | Pyruvate kinase inhibitor                                                        |
| 0,173 | 0,019 | Protein kinase C inhibitor                                                       |
| 0,173 | 0,032 | Succinic dehydrogenase inhibitor                                                 |
| 0,173 | 0,068 | Tryptophan dimethylallyltransferase inhibitor                                    |
| 0,173 | 0,077 | Anthranilate-CoA ligase inhibitor                                                |
| 0,173 | 0,089 | Antirickettsial                                                                  |
| 0,172 | 0,002 | MAP-kinase-activated kinase 1 inhibitor                                          |
| 0,172 | 0,034 | Corticosteroid antagonist                                                        |
| 0,172 | 0,039 | Estradiol 17alpha-dehydrogenase inhibitor                                        |
| 0,172 | 0,064 | Catechol oxidase inhibitor                                                       |
| 0,172 | 0,073 | Snapalysin inhibitor                                                             |
| 0,172 | 0,087 | Myeloblastin inhibitor                                                           |
| 0,172 | 0,093 | Glycine dehydrogenase (decarboxylating) inhibitor                                |
| 0,172 | 0,111 | Alpha-1,6-mannosyl-glycoprotein 4-beta-N-acetylglucosaminyltransferase inhibitor |
| 0,171 | 0,081 | N-acetyl-gamma-glutamyl-phosphate reductase inhibitor                            |
| 0,171 | 0,086 | Polyneuridine-aldehyde esterase inhibitor                                        |
| 0,170 | 0,047 | Antiviral (HIV)                                                                  |
| 0,170 | 0,113 | N-acetyllactosamine synthase inhibitor                                           |
| 0,170 | 0,116 | Cellulose 1,4-beta-cellobiosidase inhibitor                                      |
| 0,170 | 0,127 | Retinal dehydrogenase inhibitor                                                  |
| 0,169 | 0,050 | Adenylate cyclase stimulant                                                      |
| 0,169 | 0,081 | 2,4-Diaminopentanoate dehydrogenase inhibitor                                    |
| 0,169 | 0,081 | 3-Hydroxybutyryl-CoA dehydrogenase inhibitor                                     |
| 0,169 | 0,081 | Lysine 6-dehydrogenase inhibitor                                                 |
| 0,169 | 0,088 | Male reproductive dysfunction treatment                                          |
| 0,168 | 0,018 | Imidazoleacetate 4-monooxygenase inhibitor                                       |
| 0,168 | 0,039 | Tumour necrosis factor alpha antagonist                                          |
| 0,167 | 0,006 | Indoleamine-pyrrole 2,3-dioxygenase inhibitor                                    |
| 0,166 | 0,009 | Beta tubulin antagonist                                                          |
| 0,166 | 0,010 | Aromatase inhibitor                                                              |
| 0,166 | 0,047 | Pyruvate dehydrogenase inhibitor                                                 |
| 0,166 | 0,079 | Alpha-glucuronidase inhibitor                                                    |
| 0,165 | 0,059 | Aspartate-tRNA ligase inhibitor                                                  |
| 0,165 | 0,063 | Methylaspartate ammonia-lyase inhibitor                                          |
| 0,165 | 0,070 | 3'-Nucleotidase inhibitor                                                        |
| 0,165 | 0,113 | Ornithine cyclodeaminase inhibitor                                               |
| 0,164 | 0,022 | HIV-1 integrase (Overall Integration) inhibitor                                  |

|       |       |                                                                          |
|-------|-------|--------------------------------------------------------------------------|
| 0,164 | 0,038 | Prolactin inhibitor                                                      |
| 0,164 | 0,047 | Beta-cyclopiazonate dehydrogenase inhibitor                              |
| 0,164 | 0,056 | Aryl sulfotransferase inhibitor                                          |
| 0,164 | 0,062 | Glutamate (mGluR5) agonist                                               |
| 0,164 | 0,149 | 5 Hydroxytryptamine 7L antagonist                                        |
| 0,162 | 0,044 | Protein-glucosylgalactosylhydroxylysine glucosidase inhibitor            |
| 0,162 | 0,077 | Licheninase inhibitor                                                    |
| 0,162 | 0,108 | Indoleacetaldoxime dehydratase inhibitor                                 |
| 0,162 | 0,129 | Spasmolytic, Papaverin-like                                              |
| 0,162 | 0,155 | Glycine amidinotransferase inhibitor                                     |
| 0,161 | 0,075 | tRNA nucleotidyltransferase inhibitor                                    |
| 0,161 | 0,086 | GST M1-1 substrate                                                       |
| 0,161 | 0,103 | N-acetyllactosaminide beta-1,3-N-acetylglucosaminyltransferase inhibitor |
| 0,160 | 0,085 | Bisphosphoglycerate mutase inhibitor                                     |
| 0,160 | 0,133 | Carnitinamidase inhibitor                                                |
| 0,159 | 0,067 | Peptidylamidoglycolate lyase inhibitor                                   |
| 0,159 | 0,117 | Urate-ribonucleotide phosphorylase inhibitor                             |
| 0,158 | 0,041 | Phospholipase A2 inhibitor                                               |
| 0,158 | 0,070 | D-xylulose reductase inhibitor                                           |
| 0,158 | 0,092 | Acetylorntithine deacetylase inhibitor                                   |
| 0,158 | 0,094 | Microtubule formation inhibitor                                          |
| 0,158 | 0,101 | Camphor 1,2-monooxygenase inhibitor                                      |
| 0,157 | 0,019 | 4-Hydroxybenzoate-CoA ligase inhibitor                                   |
| 0,157 | 0,038 | Histone deacetylase class III inhibitor                                  |
| 0,157 | 0,076 | Pyridoxine 4-oxidase inhibitor                                           |
| 0,157 | 0,086 | N-methyl-2-oxoglutaramate hydrolase inhibitor                            |
| 0,157 | 0,130 | Opine dehydrogenase inhibitor                                            |
| 0,156 | 0,007 | Protein kinase C zeta inhibitor                                          |
| 0,156 | 0,024 | Potassium channel (Ca-activated) activator                               |
| 0,156 | 0,046 | Pyruvate dehydrogenase (lipoamide) inhibitor                             |
| 0,156 | 0,077 | NAD+ synthase (glutamine-hydrolysing) inhibitor                          |
| 0,156 | 0,090 | 4-Chlorophenylacetate 3,4-dioxygenase inhibitor                          |
| 0,156 | 0,126 | Rhizopuspepsin inhibitor                                                 |
| 0,155 | 0,033 | CYP3A5 inducer                                                           |
| 0,155 | 0,034 | L-ascorbate peroxidase inhibitor                                         |
| 0,155 | 0,147 | Imidazoline receptor agonist                                             |
| 0,154 | 0,026 | 2-Nitrophenol 2-monooxygenase inhibitor                                  |
| 0,154 | 0,076 | Oxalate oxidase inhibitor                                                |
| 0,154 | 0,088 | 1,4-Alpha-glucan branching enzyme inhibitor                              |
| 0,154 | 0,131 | GABA B receptor agonist                                                  |
| 0,154 | 0,133 | Lymphocytopoiesis inhibitor                                              |
| 0,153 | 0,012 | Bacterial efflux pump inhibitor                                          |
| 0,153 | 0,072 | Protein synthesis stimulant                                              |
| 0,153 | 0,082 | Benzoylformate decarboxylase inhibitor                                   |
| 0,152 | 0,022 | Iron antagonist                                                          |
| 0,152 | 0,046 | Riboflavin phosphotransferase inhibitor                                  |
| 0,152 | 0,055 | L-iduronidase inhibitor                                                  |

|       |       |                                                                                   |
|-------|-------|-----------------------------------------------------------------------------------|
| 0,152 | 0,080 | Undecaprenyl-diphosphatase inhibitor                                              |
| 0,152 | 0,091 | 6-Pyruvoyltetrahydropterin synthase inhibitor                                     |
| 0,152 | 0,101 | Glycine C-acetyltransferase inhibitor                                             |
| 0,152 | 0,110 | Cyclopentanone monooxygenase inhibitor                                            |
| 0,151 | 0,018 | Phosphatidylglycerol-membrane-oligosaccharide glycerophosphotransferase inhibitor |
| 0,151 | 0,026 | UGT2B11 substrate                                                                 |
| 0,151 | 0,055 | Pantoate 4-dehydrogenase inhibitor                                                |
| 0,151 | 0,060 | 3-Oxoadipate enol-lactonase inhibitor                                             |
| 0,151 | 0,072 | (R,R)-butanediol dehydrogenase inhibitor                                          |
| 0,151 | 0,083 | Quisqualate antagonist                                                            |
| 0,151 | 0,096 | Acaricide                                                                         |
| 0,151 | 0,098 | Inorganic diphosphatase inhibitor                                                 |
| 0,151 | 0,113 | Transforming growth factor beta 1 agonist                                         |
| 0,150 | 0,028 | Cyclooxygenase 2 inhibitor                                                        |
| 0,150 | 0,049 | Cysteine-S-conjugate beta-lyase inhibitor                                         |
| 0,150 | 0,072 | Glutamin-(asparagin-)ase inhibitor                                                |
| 0,150 | 0,094 | 4-Hydroxyglutamate transaminase inhibitor                                         |
| 0,150 | 0,117 | CYP4A2 substrate                                                                  |
| 0,150 | 0,119 | LDLR expression enhancer                                                          |
| 0,150 | 0,121 | (S)-3-amino-2-methylpropionate transaminase inhibitor                             |
| 0,149 | 0,005 | Histone deacetylase SIRT2 stimulant                                               |
| 0,149 | 0,025 | Isocitrate dehydrogenase (NAD+) inhibitor                                         |
| 0,149 | 0,074 | 3-Aminobutyryl-CoA ammonia-lyase inhibitor                                        |
| 0,149 | 0,101 | Dynein ATPase inhibitor                                                           |
| 0,148 | 0,026 | Histone deacetylase SIRT2 inhibitor                                               |
| 0,148 | 0,043 | Urolithiasis treatment                                                            |
| 0,148 | 0,078 | Farnesyltranstransferase inhibitor                                                |
| 0,148 | 0,082 | Smooth muscle myosin light chain kinase inhibitor                                 |
| 0,147 | 0,021 | Vanillyl-alcohol oxidase inhibitor                                                |
| 0,147 | 0,066 | Phosphoenolpyruvate-protein phosphotransferase inhibitor                          |
| 0,147 | 0,072 | Acetylenecarboxylate hydratase inhibitor                                          |
| 0,147 | 0,073 | 3-Carboxyethylcatechol 2,3-dioxygenase inhibitor                                  |
| 0,147 | 0,122 | Gallate decarboxylase inhibitor                                                   |
| 0,147 | 0,138 | Mandelate 4-monooxygenase inhibitor                                               |
| 0,146 | 0,105 | Phosphatidylglycerophosphatase inhibitor                                          |
| 0,146 | 0,118 | ADP-ribosylarginine hydrolase inhibitor                                           |
| 0,145 | 0,009 | CYP2A5 inhibitor                                                                  |
| 0,145 | 0,098 | N-acetylneuraminate 4-O-acetyltransferase inhibitor                               |
| 0,145 | 0,125 | Metallocoxyypeptidase D inhibitor                                                 |
| 0,144 | 0,005 | Stipitatonate decarboxylase inhibitor                                             |
| 0,144 | 0,037 | Narcotic antagonist                                                               |
| 0,144 | 0,062 | Antineoplastic (gastric cancer)                                                   |
| 0,144 | 0,099 | CDP-4-dehydro-6-deoxyglucose reductase inhibitor                                  |
| 0,143 | 0,015 | Interleukin 12 agonist                                                            |
| 0,143 | 0,016 | 4-Hydroxybenzoate 3-monooxygenase inhibitor                                       |
| 0,142 | 0,012 | Protein kinase A inhibitor                                                        |
| 0,142 | 0,122 | CC chemokine receptor 2B antagonist                                               |

|       |       |                                                                 |
|-------|-------|-----------------------------------------------------------------|
| 0,142 | 0,139 | Chaperonin ATPase inhibitor                                     |
| 0,141 | 0,020 | Dopachrome isomerase inhibitor                                  |
| 0,141 | 0,067 | 3-Ketovalidoxylamine C-N-lyase inhibitor                        |
| 0,141 | 0,069 | CDP-diacylglycerol-inositol 3-phosphatidyltransferase inhibitor |
| 0,140 | 0,080 | Inositol oxygenase inhibitor                                    |
| 0,140 | 0,121 | Atrolysin A inhibitor                                           |
| 0,140 | 0,121 | Leishmanolysin inhibitor                                        |
| 0,140 | 0,125 | Phenylalanine(histidine) transaminase inhibitor                 |
| 0,139 | 0,009 | Protein kinase C eta inhibitor                                  |
| 0,139 | 0,053 | Mannose-6-phosphate isomerase inhibitor                         |
| 0,139 | 0,058 | Glucan 1,6-alpha-glucosidase inhibitor                          |
| 0,139 | 0,070 | N-acetylneuraminase synthase inhibitor                          |
| 0,139 | 0,103 | Isopenicillin-N synthase inhibitor                              |
| 0,139 | 0,138 | Alanine-tRNA ligase inhibitor                                   |
| 0,138 | 0,004 | CYP11B1 inhibitor                                               |
| 0,138 | 0,022 | Interleukin 10 antagonist                                       |
| 0,138 | 0,048 | (R)-limonene 6-monooxygenase inhibitor                          |
| 0,138 | 0,054 | CYP26A substrate                                                |
| 0,138 | 0,054 | Prephenate dehydrogenase inhibitor                              |
| 0,138 | 0,100 | Antimitotic                                                     |
| 0,137 | 0,107 | Lactate 2-monooxygenase inhibitor                               |
| 0,136 | 0,002 | Aryl hydrocarbon receptor antagonist                            |
| 0,136 | 0,057 | Galacturan 1,4-alpha-galacturonidase inhibitor                  |
| 0,136 | 0,101 | Tryptophanamidase inhibitor                                     |
| 0,136 | 0,108 | Carnosine synthase inhibitor                                    |
| 0,135 | 0,003 | Aldose reductase 2 inhibitor                                    |
| 0,135 | 0,036 | Glutamate decarboxylase inhibitor                               |
| 0,135 | 0,050 | 2-Aminoadipate transaminase inhibitor                           |
| 0,135 | 0,057 | Antibiotic                                                      |
| 0,135 | 0,090 | Bile-salt sulfotransferase inhibitor                            |
| 0,135 | 0,105 | Acetate kinase inhibitor                                        |
| 0,134 | 0,062 | Phospholipase inhibitor                                         |
| 0,134 | 0,095 | Nuclease inhibitor                                              |
| 0,134 | 0,116 | Tyrosine kinase stimulant                                       |
| 0,133 | 0,009 | Glycogen synthase kinase-3 alpha inhibitor                      |
| 0,133 | 0,046 | Fibrosis treatment                                              |
| 0,133 | 0,079 | Antitussive, narcotic                                           |
| 0,133 | 0,083 | Ligase inhibitor                                                |
| 0,133 | 0,085 | Magnesium-protoporphyrin IX methyltransferase inhibitor         |
| 0,133 | 0,090 | Inulinase inhibitor                                             |
| 0,132 | 0,064 | (S)-2-hydroxy-acid oxidase inhibitor                            |
| 0,131 | 0,017 | Antidote, heavy metal                                           |
| 0,131 | 0,054 | Xylose isomerase inhibitor                                      |
| 0,131 | 0,074 | Ferredoxin-NADP+ reductase inhibitor                            |
| 0,131 | 0,096 | Sphinganine-1-phosphate aldolase inhibitor                      |
| 0,131 | 0,104 | Glycerol dehydrogenase (NADP+) inhibitor                        |
| 0,131 | 0,126 | N-(long-chain-acyl)ethanolamine deacylase inhibitor             |

|       |       |                                                                |
|-------|-------|----------------------------------------------------------------|
| 0,130 | 0,030 | Antibiotic Anthracycline-like                                  |
| 0,130 | 0,033 | MAP-kinase-activated kinase 2 inhibitor                        |
| 0,130 | 0,038 | Anabolic                                                       |
| 0,130 | 0,090 | Hexokinase inhibitor                                           |
| 0,130 | 0,110 | Alkylglycerone-phosphate synthase inhibitor                    |
| 0,129 | 0,004 | CD45 antagonist                                                |
| 0,129 | 0,065 | Acyl-lysine deacylase inhibitor                                |
| 0,129 | 0,070 | Allantoinase inhibitor                                         |
| 0,129 | 0,074 | Allantoate deiminase inhibitor                                 |
| 0,129 | 0,080 | Mannan endo-1,6-alpha-mannosidase inhibitor                    |
| 0,129 | 0,081 | Glucuronolactone reductase inhibitor                           |
| 0,129 | 0,111 | Serratia marcescens nuclease inhibitor                         |
| 0,129 | 0,111 | Poly(alpha-L-gulonate) lyase inhibitor                         |
| 0,128 | 0,069 | Prepilin peptidase inhibitor                                   |
| 0,128 | 0,069 | Haloacetate dehalogenase inhibitor                             |
| 0,128 | 0,078 | 5 Hydroxytryptamine 2A agonist                                 |
| 0,128 | 0,091 | Gly-X carboxypeptidase inhibitor                               |
| 0,128 | 0,098 | VCAM1 expression inhibitor                                     |
| 0,128 | 0,099 | Subtilisin inhibitor                                           |
| 0,128 | 0,113 | Geranylgeranyl-diphosphate geranylgeranyltransferase inhibitor |
| 0,128 | 0,120 | Cystinyl aminopeptidase inhibitor                              |
| 0,127 | 0,018 | Phosphogluconate dehydrogenase (decarboxylating) inhibitor     |
| 0,127 | 0,066 | Glycogen (starch) synthase inhibitor                           |
| 0,127 | 0,079 | Interferon antagonist                                          |
| 0,127 | 0,085 | Insecticide                                                    |
| 0,126 | 0,007 | UGT2B7Y substrate                                              |
| 0,126 | 0,007 | UGT2B7H substrate                                              |
| 0,126 | 0,009 | Heat shock protein 70 antagonist                               |
| 0,126 | 0,010 | CDC25 phosphatase inhibitor                                    |
| 0,126 | 0,030 | c-Src kinase inhibitor                                         |
| 0,126 | 0,040 | Shikimate kinase inhibitor                                     |
| 0,126 | 0,043 | Succinate dehydrogenase inhibitor                              |
| 0,126 | 0,082 | FMN reductase inhibitor                                        |
| 0,126 | 0,099 | Hepatocyte nuclear factor antagonist                           |
| 0,126 | 0,099 | Hepatocyte nuclear factor 4 alpha antagonist                   |
| 0,126 | 0,106 | MDM2 inhibitor                                                 |
| 0,125 | 0,012 | Quinate 5-dehydrogenase inhibitor                              |
| 0,125 | 0,028 | Tyrosine 2,3-aminomutase inhibitor                             |
| 0,125 | 0,044 | Renilla-luciferin 2-monooxygenase inhibitor                    |
| 0,125 | 0,076 | Interferon gamma antagonist                                    |
| 0,125 | 0,085 | Cellulase inhibitor                                            |
| 0,125 | 0,125 | Polar-amino-acid-transporting ATPase inhibitor                 |
| 0,124 | 0,020 | T cell inhibitor                                               |
| 0,124 | 0,036 | Transthyretin amyloid fibril formation inhibitor               |
| 0,124 | 0,038 | Tyrosine-ester sulfotransferase inhibitor                      |
| 0,124 | 0,052 | Bcl2 antagonist                                                |
| 0,124 | 0,059 | Pyridoxine 5-dehydrogenase inhibitor                           |



|       |       |                                                                        |
|-------|-------|------------------------------------------------------------------------|
| 0,124 | 0,072 | N-(5-amino-5-carboxypentanoyl)-L-cysteinyl-D-valine synthase inhibitor |
| 0,124 | 0,074 | D-lactate dehydrogenase inhibitor                                      |
| 0,124 | 0,114 | Pyruvate carboxylase inhibitor                                         |
| 0,123 | 0,003 | Neuraminidase inhibitor                                                |
| 0,123 | 0,041 | Orotate reductase (NADPH) inhibitor                                    |
| 0,123 | 0,051 | D-arabinonolactone oxidase inhibitor                                   |
| 0,123 | 0,065 | Asparagine-tRNA ligase inhibitor                                       |
| 0,123 | 0,078 | Allophanate hydrolase inhibitor                                        |
| 0,123 | 0,082 | Galactokinase inhibitor                                                |
| 0,123 | 0,098 | Phenylacetate-CoA ligase inhibitor                                     |
| 0,122 | 0,070 | Glucan endo-1,3-alpha-glucosidase inhibitor                            |
| 0,122 | 0,078 | N-carbamoyl-L-amino-acid hydrolase inhibitor                           |
| 0,121 | 0,024 | Gynecological disorders treatment                                      |
| 0,121 | 0,062 | Bronchodilator                                                         |
| 0,121 | 0,065 | Carboxymethylenebutenolidase inhibitor                                 |
| 0,121 | 0,105 | IgA-specific metalloendopeptidase inhibitor                            |
| 0,120 | 0,043 | Acetoacetate decarboxylase inhibitor                                   |
| 0,120 | 0,051 | Fructose-2,6-bisphosphate 6-phosphatase inhibitor                      |
| 0,120 | 0,059 | Endo-1,4-beta-xylanase inhibitor                                       |
| 0,120 | 0,069 | Alpha-pinene-oxide decyclase inhibitor                                 |
| 0,120 | 0,091 | Cyclamate sulfohydrolase inhibitor                                     |
| 0,120 | 0,093 | CYP4B substrate                                                        |
| 0,119 | 0,055 | Phenylalanine 4-hydroxylase inhibitor                                  |
| 0,119 | 0,061 | Aspartyl aminopeptidase inhibitor                                      |
| 0,119 | 0,079 | Alpha-N-arabinofuranosidase inhibitor                                  |
| 0,119 | 0,081 | Aminocarboxymuconate-semialdehyde decarboxylase inhibitor              |
| 0,119 | 0,099 | 3-Chloro-D-alanine dehydrochlorinase inhibitor                         |
| 0,119 | 0,105 | Plasmanyethanolamine desaturase inhibitor                              |
| 0,118 | 0,017 | Sphingosine kinase inhibitor                                           |
| 0,118 | 0,044 | 2-Dehydropantolactone reductase (A-specific) inhibitor                 |
| 0,118 | 0,045 | Homocysteine desulfhydrase inhibitor                                   |
| 0,118 | 0,086 | Acid-sensing ion channel blocker                                       |
| 0,118 | 0,110 | GST T substrate                                                        |
| 0,118 | 0,110 | GST T1-1 substrate                                                     |
| 0,117 | 0,014 | Phosphatidylinositol kinase inhibitor                                  |
| 0,117 | 0,069 | Poly(ADP-ribose) glycohydrolase inhibitor                              |
| 0,117 | 0,071 | Acetolactate decarboxylase inhibitor                                   |
| 0,117 | 0,083 | Diisopropyl-fluorophosphatase inhibitor                                |
| 0,117 | 0,086 | CYP4B1 substrate                                                       |
| 0,117 | 0,087 | Agmatinase inhibitor                                                   |
| 0,117 | 0,092 | Iron-cytochrome-c reductase inhibitor                                  |
| 0,117 | 0,105 | Quinoline-4-carboxylate 2-oxidoreductase inhibitor                     |
| 0,116 | 0,005 | 3-Phosphoshikimate 1-carboxyvinyltransferase inhibitor                 |
| 0,116 | 0,059 | Guanidinodeoxy-scylo-inositol-4-phosphatase inhibitor                  |
| 0,116 | 0,065 | 3-Hydroxyacyl-CoA dehydrogenase inhibitor                              |
| 0,116 | 0,066 | Choloylglycine hydrolase inhibitor                                     |
| 0,115 | 0,008 | Dihydroxyacetanilide epoxidase inhibitor                               |

|       |       |                                                                                   |
|-------|-------|-----------------------------------------------------------------------------------|
| 0,115 | 0,008 | Dihydroxyacetanilide dehydrogenase inhibitor                                      |
| 0,115 | 0,010 | Hot flush treatment                                                               |
| 0,115 | 0,065 | Glucarate dehydratase inhibitor                                                   |
| 0,115 | 0,084 | Glutamate-1-semialdehyde 2,1-aminomutase inhibitor                                |
| 0,114 | 0,008 | Estrogen-related receptor alpha antagonist                                        |
| 0,114 | 0,018 | 3,4-Dihydroxyphenylacetate 2,3-dioxygenase inhibitor                              |
| 0,114 | 0,046 | Glycerol dehydratase inhibitor                                                    |
| 0,114 | 0,069 | Antitreponemal                                                                    |
| 0,114 | 0,076 | 2-Oxoisovalerate dehydrogenase (acylating) inhibitor                              |
| 0,114 | 0,108 | 2-Haloacid dehalogenase (configuration-inverting) inhibitor                       |
| 0,113 | 0,007 | Tannase inhibitor                                                                 |
| 0,113 | 0,019 | Protein kinase C beta inhibitor                                                   |
| 0,113 | 0,070 | Estrone sulfotransferase inhibitor                                                |
| 0,113 | 0,081 | Neurotrophic factor                                                               |
| 0,113 | 0,088 | Selenocysteine lyase inhibitor                                                    |
| 0,113 | 0,105 | Catalase inhibitor                                                                |
| 0,113 | 0,113 | N-Acyl-D-amino-acid deacylase inhibitor                                           |
| 0,112 | 0,007 | UGT2B19 substrate                                                                 |
| 0,112 | 0,007 | UGT2B23 substrate                                                                 |
| 0,112 | 0,007 | UGT2B4D substrate                                                                 |
| 0,112 | 0,007 | UGT2B4E substrate                                                                 |
| 0,112 | 0,007 | UGT2B30 substrate                                                                 |
| 0,112 | 0,014 | Phosphatidylinositol 3-kinase inhibitor                                           |
| 0,112 | 0,016 | Hydroxyquinol 1,2-dioxygenase inhibitor                                           |
| 0,112 | 0,047 | Glycerophosphocholine cholinephosphodiesterase inhibitor                          |
| 0,112 | 0,048 | Glycoprotein-fucosylgalactoside alpha-N-acetylgalactosaminyltransferase inhibitor |
| 0,112 | 0,053 | Sorbose dehydrogenase inhibitor                                                   |
| 0,112 | 0,056 | NMDA receptor polyamine site antagonist                                           |
| 0,112 | 0,076 | Deoxyribose-phosphate aldolase inhibitor                                          |
| 0,111 | 0,021 | 3(or 17)alpha-hydroxysteroid dehydrogenase inhibitor                              |
| 0,111 | 0,033 | 6,7-Dihydropteridine reductase inhibitor                                          |
| 0,111 | 0,073 | D-2-hydroxy-acid dehydrogenase inhibitor                                          |
| 0,111 | 0,078 | Steroid 9alpha-monooxygenase inhibitor                                            |
| 0,111 | 0,080 | Beta lactamase inhibitor                                                          |
| 0,111 | 0,084 | 2-Dehydropantoate aldolase inhibitor                                              |
| 0,111 | 0,090 | Galactose oxidase inhibitor                                                       |
| 0,111 | 0,092 | Galactose 1-dehydrogenase (NADP+) inhibitor                                       |
| 0,111 | 0,092 | Beta-alanine-pyruvate transaminase inhibitor                                      |
| 0,111 | 0,111 | Secretase alpha stimulant                                                         |
| 0,111 | 0,111 | Secretase stimulant                                                               |
| 0,110 | 0,005 | Aldehyde dehydrogenase 1A2 inhibitor                                              |
| 0,109 | 0,005 | PRL phosphatase inhibitor                                                         |
| 0,109 | 0,017 | NMDA receptor glycine site B antagonist                                           |
| 0,109 | 0,057 | Polynucleotide adenyltransferase inhibitor                                        |
| 0,109 | 0,060 | Phosphoglycerate mutase inhibitor                                                 |
| 0,109 | 0,107 | Galactoside O-acetyltransferase inhibitor                                         |
| 0,108 | 0,063 | DNA-3-methyladenine glycosylase II inhibitor                                      |

|       |       |                                                              |
|-------|-------|--------------------------------------------------------------|
| 0,108 | 0,092 | Ethanolaminephosphotransferase inhibitor                     |
| 0,108 | 0,093 | Dolichyl-phosphatase inhibitor                               |
| 0,107 | 0,007 | Catechol O methyltransferase inhibitor                       |
| 0,107 | 0,071 | L-lysine 6-transaminase inhibitor                            |
| 0,107 | 0,078 | NADH dehydrogenase inhibitor                                 |
| 0,107 | 0,087 | BRAF expression inhibitor                                    |
| 0,107 | 0,092 | Thiamine-phosphate kinase inhibitor                          |
| 0,106 | 0,039 | Chelator                                                     |
| 0,106 | 0,056 | Poly(3-hydroxybutyrate) depolymerase inhibitor               |
| 0,106 | 0,059 | MAP kinase kinase 7 inhibitor                                |
| 0,105 | 0,057 | Malonate-semialdehyde dehydrogenase inhibitor                |
| 0,105 | 0,082 | Sulfate adenylyltransferase (ADP) inhibitor                  |
| 0,105 | 0,083 | Glucosamine-6-phosphate deaminase inhibitor                  |
| 0,105 | 0,083 | Adenylyl-sulfate kinase inhibitor                            |
| 0,104 | 0,005 | CDC25B inhibitor                                             |
| 0,104 | 0,053 | Beta amyloid protein antagonist                              |
| 0,104 | 0,073 | UDP-glucose-hexose-1-phosphate uridylyltransferase inhibitor |
| 0,103 | 0,014 | Adenosine deaminase inhibitor                                |
| 0,103 | 0,023 | Opioid mu 2 receptor antagonist                              |
| 0,103 | 0,043 | Galactosylceramide sulfotransferase inhibitor                |
| 0,102 | 0,021 | Aldose 1-epimerase inhibitor                                 |
| 0,102 | 0,045 | CYP4F substrate                                              |
| 0,102 | 0,055 | Arylamine N-Acetyltransferase substrate                      |
| 0,102 | 0,059 | Agaritine gamma-glutamyltransferase inhibitor                |
| 0,102 | 0,073 | Pyrimidine-deoxynucleoside 2'-dioxygenase inhibitor          |
| 0,102 | 0,074 | Trypanothione-disulfide reductase inhibitor                  |
| 0,102 | 0,085 | Carnitine dehydratase inhibitor                              |
| 0,101 | 0,079 | Cytidine deaminase inhibitor                                 |
| 0,101 | 0,100 | NAD(P)+ transhydrogenase (B-specific) inhibitor              |
| 0,100 | 0,007 | Phosphatidylinositol 3-kinase alpha inhibitor                |
| 0,100 | 0,033 | Beta 1 adrenoreceptor agonist                                |
| 0,100 | 0,047 | Insulin sensitizer                                           |
| 0,100 | 0,061 | Cholestenone 5alpha-reductase inhibitor                      |
| 0,100 | 0,084 | Ca <sup>2+</sup> -transporting ATPase inhibitor              |
| 0,099 | 0,035 | Ornithine decarboxylase inhibitor                            |
| 0,099 | 0,041 | Phosphomevalonate kinase inhibitor                           |
| 0,099 | 0,060 | 4-Alpha-glucanotransferase inhibitor                         |
| 0,099 | 0,082 | D-lactate dehydrogenase (cytochrome) inhibitor               |
| 0,099 | 0,088 | Fructose-2,6-bisphosphate 2-phosphatase inhibitor            |
| 0,098 | 0,016 | SULT1A2 substrate                                            |
| 0,098 | 0,033 | 3(or 17)beta-hydroxysteroid dehydrogenase inhibitor          |
| 0,098 | 0,037 | Cyclin-dependent kinase 1 inhibitor                          |
| 0,098 | 0,080 | D-cysteine desulfhydrase inhibitor                           |
| 0,098 | 0,085 | Phosphonoacetate hydrolase inhibitor                         |
| 0,097 | 0,060 | Heme oxygenase inhibitor                                     |
| 0,097 | 0,075 | Chondroitin 6-sulfotransferase inhibitor                     |
| 0,097 | 0,081 | Glucosamine-1-phosphate N-acetyltransferase inhibitor        |

|       |       |                                                                |
|-------|-------|----------------------------------------------------------------|
| 0,097 | 0,083 | Src kinase inhibitor                                           |
| 0,096 | 0,055 | 2-Hydroxy-3-oxopropionate reductase inhibitor                  |
| 0,096 | 0,055 | Isomaltulose synthase inhibitor                                |
| 0,096 | 0,079 | Antifungal enhancer                                            |
| 0,096 | 0,082 | Aldehyde dehydrogenase [NAD(P)+] inhibitor                     |
| 0,096 | 0,093 | Trimethyllysine dioxygenase inhibitor                          |
| 0,095 | 0,027 | SULT2A1 substrate                                              |
| 0,095 | 0,065 | Monocarboxylic acid transporter inhibitor                      |
| 0,095 | 0,065 | Monocarboxylic acid transporter 1 inhibitor                    |
| 0,095 | 0,069 | Trehalose-phosphatase inhibitor                                |
| 0,095 | 0,074 | Pyridoxal kinase inhibitor                                     |
| 0,095 | 0,085 | Photinus-luciferin 4-monooxygenase (ATP-hydrolysing) inhibitor |
| 0,095 | 0,095 | Adenylate cyclase V inhibitor                                  |
| 0,094 | 0,024 | CDC25C inhibitor                                               |
| 0,094 | 0,049 | Hair growth stimulant                                          |
| 0,094 | 0,050 | Tagaturonate reductase inhibitor                               |
| 0,094 | 0,050 | Fructuronate reductase inhibitor                               |
| 0,094 | 0,071 | UDP-glucose 4-epimerase inhibitor                              |
| 0,094 | 0,076 | Aerobactin synthase inhibitor                                  |
| 0,094 | 0,081 | Aspartate racemase inhibitor                                   |
| 0,093 | 0,070 | Deoxycytidine deaminase inhibitor                              |
| 0,091 | 0,058 | Octadecanal decarbonylase inhibitor                            |
| 0,091 | 0,062 | Aromatic-amino-acid transaminase inhibitor                     |
| 0,091 | 0,065 | Aconitate decarboxylase inhibitor                              |
| 0,091 | 0,073 | Ketohexokinase inhibitor                                       |
| 0,091 | 0,075 | Leucine transaminase inhibitor                                 |
| 0,091 | 0,080 | Glyceraldehyde-3-phosphate dehydrogenase (NADP+) inhibitor     |
| 0,091 | 0,089 | Carboxylesterase inhibitor                                     |
| 0,090 | 0,031 | Steroid sulfotransferase inhibitor                             |
| 0,090 | 0,040 | Epoxide hydrolase substrate                                    |
| 0,090 | 0,072 | Gluconate dehydratase inhibitor                                |
| 0,090 | 0,077 | Antispirochetal                                                |
| 0,089 | 0,017 | Alpha 3 adrenoreceptor agonist                                 |
| 0,089 | 0,037 | 4-Pyridoxolactonase inhibitor                                  |
| 0,089 | 0,053 | CYP26 substrate                                                |
| 0,089 | 0,067 | Granulocyte macrophage colony stimulating factor agonist       |
| 0,088 | 0,015 | Orcinol 2-monooxygenase inhibitor                              |
| 0,088 | 0,058 | Deoxyribonuclease (pyrimidine dimer) inhibitor                 |
| 0,088 | 0,067 | Alpha,alpha-trehalase inhibitor                                |
| 0,088 | 0,082 | Pantothenase inhibitor                                         |
| 0,087 | 0,081 | Glucan 1,3-beta-glucosidase inhibitor                          |
| 0,087 | 0,083 | GABA transporter 3 inhibitor                                   |
| 0,086 | 0,020 | Diiodotyrosine transaminase inhibitor                          |
| 0,086 | 0,024 | 4-Hydroxybenzoate 1-hydroxylase inhibitor                      |
| 0,086 | 0,025 | Protein kinase C mu inhibitor                                  |
| 0,086 | 0,076 | Adenylylsulphatase inhibitor                                   |
| 0,086 | 0,084 | Porphobilinogen synthase inhibitor                             |

|       |       |                                                                                   |
|-------|-------|-----------------------------------------------------------------------------------|
| 0,085 | 0,041 | Pim-2 kinase inhibitor                                                            |
| 0,085 | 0,066 | Dichloromuconate cycloisomerase inhibitor                                         |
| 0,085 | 0,071 | Gluconokinase inhibitor                                                           |
| 0,085 | 0,080 | Ribitol 2-dehydrogenase inhibitor                                                 |
| 0,084 | 0,063 | 2-Dehydro-3-deoxy-L-arabinonate dehydratase inhibitor                             |
| 0,084 | 0,065 | 1,5-Anhydro-D-fructose reductase inhibitor                                        |
| 0,084 | 0,078 | Triose-phosphate isomerase inhibitor                                              |
| 0,084 | 0,083 | Acetoin dehydrogenase inhibitor                                                   |
| 0,083 | 0,031 | 3-Oxoacyl-[acyl-carrier-protein] synthase III inhibitor                           |
| 0,082 | 0,014 | 4-Hydroxyphenylacetate 1-monooxygenase inhibitor                                  |
| 0,082 | 0,043 | Leukotriene antagonist                                                            |
| 0,081 | 0,044 | DNA repair enzyme inhibitor                                                       |
| 0,081 | 0,062 | 3-Deoxy-8-phosphooctulonate synthase inhibitor                                    |
| 0,080 | 0,052 | Mycodextranase inhibitor                                                          |
| 0,079 | 0,042 | Oxytocin agonist                                                                  |
| 0,079 | 0,059 | Multidrug resistance-associated protein inhibitor                                 |
| 0,079 | 0,061 | MAO B substrate                                                                   |
| 0,078 | 0,057 | Protein kinase B stimulant                                                        |
| 0,077 | 0,021 | Prolyl endopeptidase inhibitor                                                    |
| 0,077 | 0,030 | Steroid DELTA-isomerase inhibitor                                                 |
| 0,077 | 0,039 | Transcription factor AP-1 inhibitor                                               |
| 0,077 | 0,067 | Saccharopine dehydrogenase (NAD+, L-glutamate-forming) inhibitor                  |
| 0,077 | 0,072 | UDP-N-acetylglucosamine diphosphorylase inhibitor                                 |
| 0,075 | 0,011 | Tyrosine phenol-lyase inhibitor                                                   |
| 0,075 | 0,036 | Glyceraldehyde-3-phosphate dehydrogenase inhibitor                                |
| 0,075 | 0,049 | 3-Dehydroquininate dehydratase inhibitor                                          |
| 0,075 | 0,058 | Multidrug resistance-associated protein 1 inhibitor                               |
| 0,074 | 0,018 | Secretase beta 1 inhibitor                                                        |
| 0,074 | 0,023 | Opioid mu 1 receptor antagonist                                                   |
| 0,074 | 0,029 | Leukotriene C antagonist                                                          |
| 0,074 | 0,033 | Androgen antagonist                                                               |
| 0,074 | 0,036 | Alpha,alpha-phosphotrehalase inhibitor                                            |
| 0,074 | 0,074 | Haloalkane dehalogenase inhibitor                                                 |
| 0,073 | 0,027 | Mandelate racemase inhibitor                                                      |
| 0,073 | 0,050 | Inositol-3-phosphate synthase inhibitor                                           |
| 0,073 | 0,054 | N-acetylglucosaminyldiphosphoundecaprenol N-acetyl-beta-D-mannosaminyltransferase |
| 0,073 | 0,061 | 2-Methylcitrate dehydratase inhibitor                                             |
| 0,073 | 0,066 | Retinol O-fatty-acyltransferase inhibitor                                         |
| 0,073 | 0,067 | Cellobiose phosphorylase inhibitor                                                |
| 0,073 | 0,067 | Muconate cycloisomerase inhibitor                                                 |
| 0,072 | 0,019 | Protein kinase C delta inhibitor                                                  |
| 0,071 | 0,043 | Tubulin-tyrosine ligase inhibitor                                                 |
| 0,071 | 0,053 | Endometriosis treatment                                                           |
| 0,071 | 0,054 | High-mannose-oligosaccharide beta-1,4-N-acetylglucosaminyltransferase inhibitor   |
| 0,069 | 0,058 | CYP2C2 substrate                                                                  |
| 0,069 | 0,060 | Isoamylase inhibitor                                                              |
| 0,068 | 0,037 | CYP24 inhibitor                                                                   |

|       |       |                                                             |
|-------|-------|-------------------------------------------------------------|
| 0,068 | 0,063 | L-fuconate dehydratase inhibitor                            |
| 0,067 | 0,054 | 3-Alpha-hydroxysteroid dehydrogenase (B-specific) inhibitor |
| 0,066 | 0,024 | Secretase beta inhibitor                                    |
| 0,066 | 0,030 | Lipase inhibitor                                            |
| 0,065 | 0,020 | Protein kinase C nu inhibitor                               |
| 0,065 | 0,028 | Glutamate (mGluR1) agonist                                  |
| 0,065 | 0,030 | Bcl-xL inhibitor                                            |
| 0,065 | 0,031 | Potassium channel large-conductance Ca-activated activator  |
| 0,065 | 0,059 | (S)-2-Methylmalate dehydratase inhibitor                    |
| 0,065 | 0,063 | Arginine decarboxylase inhibitor                            |
| 0,064 | 0,008 | Phosphatidylinositol 3-kinase gamma inhibitor               |
| 0,064 | 0,031 | Catechol 2,3-dioxygenase inhibitor                          |
| 0,064 | 0,033 | Tyrosine transaminase inhibitor                             |
| 0,064 | 0,064 | 2-Dehydro-3-deoxy-phosphogluconate aldolase inhibitor       |
| 0,063 | 0,010 | Chelator, Iron                                              |
| 0,063 | 0,015 | 4-Hydroxybenzoate 3-monooxygenase [NAD(P)H] inhibitor       |
| 0,063 | 0,022 | 4-Hydroxyphenylpyruvate dioxygenase inhibitor               |
| 0,063 | 0,059 | Aralkylamine dehydrogenase inhibitor                        |
| 0,063 | 0,060 | Oxaloacetate decarboxylase inhibitor                        |
| 0,062 | 0,007 | FtsZ polymerization inhibitor                               |
| 0,062 | 0,046 | Adenosine A3 receptor antagonist                            |
| 0,062 | 0,061 | Lactate-malate transhydrogenase inhibitor                   |
| 0,061 | 0,007 | Orsellinate decarboxylase inhibitor                         |
| 0,061 | 0,016 | Anhydrotetracycline monooxygenase inhibitor                 |
| 0,060 | 0,005 | Opioid delta 2 receptor antagonist                          |
| 0,060 | 0,047 | Pyridoxamine-phosphate oxidase inhibitor                    |
| 0,060 | 0,060 | Plasminogen activator stimulant                             |
| 0,058 | 0,005 | Purinergic P2X4 antagonist                                  |
| 0,058 | 0,006 | Opioid delta 1 receptor antagonist                          |
| 0,058 | 0,018 | Aldehyde dehydrogenase 3 substrate                          |
| 0,058 | 0,049 | Leukotriene B4 antagonist                                   |
| 0,058 | 0,055 | Prephenate dehydratase inhibitor                            |
| 0,057 | 0,048 | Arabinogalactan endo-1,4-beta-galactosidase inhibitor       |
| 0,057 | 0,050 | Phenylalanine 2-monooxygenase inhibitor                     |
| 0,057 | 0,057 | UDP-N-acetylmuramoylalanine-D-glutamate ligase inhibitor    |
| 0,056 | 0,037 | Osmotic diuretic                                            |
| 0,055 | 0,031 | 17-Beta-hydroxysteroid dehydrogenase 1 inhibitor            |
| 0,055 | 0,034 | Dual specificity protein phosphatase VHR inhibitor          |
| 0,054 | 0,026 | CYP3A11 substrate                                           |
| 0,051 | 0,040 | Protein kinase C epsilon inhibitor                          |
| 0,050 | 0,005 | Protein kinase C beta I inhibitor                           |
| 0,050 | 0,016 | Protocatechuate 4,5-dioxygenase inhibitor                   |
| 0,049 | 0,035 | Dihydroorotate oxidase inhibitor                            |
| 0,049 | 0,042 | CYP17 substrate                                             |
| 0,049 | 0,046 | Antifungal (Pneumocystis)                                   |
| 0,048 | 0,039 | Deoxyhypusine monooxygenase inhibitor                       |
| 0,047 | 0,021 | Cyclohexadienyl dehydrogenase inhibitor                     |

|       |       |                                             |
|-------|-------|---------------------------------------------|
| 0,047 | 0,045 | Glycolaldehyde dehydrogenase inhibitor      |
| 0,045 | 0,032 | Chorismate mutase inhibitor                 |
| 0,043 | 0,029 | Electron transport complex I inhibitor      |
| 0,043 | 0,040 | Phospholipase A2 IIa inhibitor              |
| 0,042 | 0,004 | NAD(P)H dehydrogenase (quinone) 1 inhibitor |
| 0,042 | 0,018 | Opioid kappa 1 receptor antagonist          |
| 0,042 | 0,041 | Thyroid hormone agonist                     |
| 0,039 | 0,033 | Cholesterol absorption inhibitor            |
| 0,039 | 0,039 | CDK4/cyclin D1 inhibitor                    |
| 0,037 | 0,019 | Ryanodine receptor 1 antagonist             |
| 0,037 | 0,019 | Ryanodine receptor antagonist               |
| 0,036 | 0,036 | Antimitotic, Podophyllotoxin-like           |
| 0,035 | 0,017 | Vitamin K-like                              |
| 0,035 | 0,018 | Nucleoside transporters inhibitor           |
| 0,033 | 0,021 | Postcoital contraceptive                    |
| 0,031 | 0,029 | Cortisol sulfotransferase inhibitor         |
| 0,030 | 0,019 | DNA gyrase inhibitor                        |
| 0,028 | 0,015 | Phenylpyruvate tautomerase inhibitor        |
| 0,028 | 0,018 | Phosphogluconate 2-dehydrogenase inhibitor  |
| 0,027 | 0,026 | Dopamine D1A antagonist                     |
| 0,024 | 0,014 | Antibiotic Tetracycline-like                |
| 0,022 | 0,018 | Dopamine D2B antagonist                     |













| Kaempferol |       |                                          | Myricetin |       |
|------------|-------|------------------------------------------|-----------|-------|
| Pa         | Pi    | Activity                                 | Pa        | Pi    |
| 0,983      | 0,001 | Chlordecone reductase inhibitor          | 0,984     | 0,001 |
| 0,974      | 0,002 | Membrane integrity agonist               | 0,969     | 0,002 |
| 0,969      | 0,002 | HIF1A expression inhibitor               | 0,967     | 0,001 |
| 0,965      | 0,001 | 2-Dehydropantoate 2-reductase inh        | 1 0,968   | 0,002 |
| 0,961      | 0,001 | Aryl-alcohol dehydrogenase (NADP+        | 2 0,966   | 0,001 |
| 0,959      | 0,001 | Kinase inhibitor                         | 0,964     | 0,002 |
| 0,959      | 0,001 | P-benzoquinone reductase (NADPH)         | 3 0,963   | 0,001 |
| 0,957      | 0,002 | Membrane permeability inhibitor          | 0,961     | 0,001 |
| 0,956      | 0,001 | Peroxidase inhibitor                     | 0,959     | 0,002 |
| 0,951      | 0,001 | Quercetin 2,3-dioxygenase inhibitor      | 0,958     | 0,001 |
| 0,948      | 0,001 | Antimutagenic                            | 0,957     | 0,001 |
| 0,947      | 0,001 | NADPH-ferrihemoprotein reductase inhib   | 0,953     | 0,001 |
| 0,945      | 0,002 | HMOX1 expression enhancer                | 0,952     | 0,002 |
| 0,944      | 0,002 | CYP1A inducer                            | 0,948     | 0,002 |
| 0,931      | 0,001 | 2-Dehydropantolactone reductase (A-spe   | 0,946     | 0,001 |
| 0,931      | 0,001 | Glycerol dehydrogenase (NADP+) inhibito  | 0,944     | 0,001 |
| 0,933      | 0,003 | CYP1A1 substrate                         | 0,946     | 0,004 |
| 0,931      | 0,004 | TP53 expression enhancer                 | 0,944     | 0,004 |
| 0,926      | 0,001 | Cystathionine beta-synthase inhibitor    | 0,939     | 0,001 |
| 0,928      | 0,004 | CYP1A substrate                          | 0,938     | 0,001 |
| 0,925      | 0,001 | 2-Enoate reductase inhibitor             | 0,931     | 0,001 |
| 0,924      | 0,001 | CYP1A1 inducer                           | 0,927     | 0,002 |
| 0,929      | 0,006 | CYP2C12 substrate                        | 4 0,924   | 0,003 |
| 0,923      | 0,002 | Alcohol dehydrogenase (NADP+) inhibitor  | 0,917     | 0,001 |
| 0,923      | 0,004 | Ubiquinol-cytochrome-c reductase inhibit | 0,919     | 0,003 |
| 0,919      | 0,001 | Beta-carotene 15,15'-monooxygenase inl   | 0,917     | 0,001 |
| 0,917      | 0,001 | MAP kinase stimulant                     | 0,919     | 0,004 |
| 0,906      | 0,002 | UGT1A9 substrate                         | 0,914     | 0,001 |
| 0,907      | 0,004 | CYP1A2 substrate                         | 5 0,915   | 0,004 |
| 0,904      | 0,002 | Histidine kinase inhibitor               | 0,912     | 0,002 |
| 0,896      | 0,003 | CYP1A inhibitor                          | 0,908     | 0,004 |
| 0,894      | 0,002 | Antihemorrhagic                          | 0,906     | 0,002 |
| 0,894      | 0,004 | Anaphylatoxin receptor antagonist        | 0,903     | 0,001 |
| 0,890      | 0,002 | Xenobiotic-transporting ATPase inhibitor | 0,900     | 0,002 |
| 0,889      | 0,002 | NADPH oxidase inhibitor                  | 0,899     | 0,002 |
| 0,887      | 0,002 | UGT1A10 substrate                        | 0,897     | 0,002 |
| 0,878      | 0,001 | Chalcone isomerase inhibitor             | 0,898     | 0,003 |
| 0,880      | 0,003 | CYP1A2 inhibitor                         | 0,903     | 0,011 |
| 0,881      | 0,005 | Apoptosis agonist                        | 0,892     | 0,002 |
| 0,868      | 0,002 | AR expression inhibitor                  | 0,893     | 0,006 |
| 0,865      | 0,002 | CYP1A1 inhibitor                         | 0,886     | 0,003 |
| 0,867      | 0,005 | Aldehyde oxidase inhibitor               | 0,876     | 0,002 |
| 0,858      | 0,001 | Testosterone 17beta-dehydrogenase inhi   | 0,877     | 0,003 |
| 0,858      | 0,002 | UGT1A3 substrate                         | 0,876     | 0,002 |

|       |       |                                          |         |       |
|-------|-------|------------------------------------------|---------|-------|
| 0,856 | 0,003 | Antioxidant                              | 0,866   | 0,001 |
| 0,856 | 0,003 | UGT1A substrate                          | 0,860   | 0,001 |
| 0,852 | 0,010 | Antiseborrheic                           | 0,861   | 0,004 |
| 0,841 | 0,001 | Iodide peroxidase inhibitor              | 0,856   | 0,002 |
| 0,857 | 0,018 | Aspulinone dimethylallyltransferase inhi | 0,850   | 0,002 |
| 0,838 | 0,003 | UGT1A1 substrate                         | 0,853   | 0,006 |
| 0,833 | 0,004 | UDP-glucuronosyltransferase substrate    | 0,846   | 0,003 |
| 0,823 | 0,001 | Creatine kinase inhibitor                | 0,839   | 0,002 |
| 0,824 | 0,002 | CYP19 inhibitor                          | 0,841   | 0,008 |
| 0,821 | 0,006 | CYP3A4 inducer                           | 0,836   | 0,003 |
| 0,815 | 0,001 | CYP19A1 expression inhibitor             | 6 0,832 | 0,002 |
| 0,814 | 0,003 | Cardioprotectant                         | 0,824   | 0,001 |
| 0,809 | 0,002 | CYP1B1 inhibitor                         | 0,823   | 0,002 |
| 0,808 | 0,002 | 1-Alkylglycerophosphocholine O-acetyltræ | 0,808   | 0,002 |
| 0,807 | 0,005 | Vasoprotector                            | 0,806   | 0,002 |
| 0,798 | 0,001 | Alcohol dehydrogenase [NAD(P)+] inhibitr | 0,809   | 0,006 |
| 0,797 | 0,002 | NOS2 expression inhibitor                | 0,803   | 0,001 |
| 0,796 | 0,002 | Hemostatic                               | 0,803   | 0,003 |
| 0,794 | 0,005 | 27-Hydroxycholesterol 7alpha-monooxyg    | 0,798   | 0,001 |
| 0,782 | 0,003 | UGT1A8 substrate                         | 0,800   | 0,005 |
| 0,783 | 0,004 | Lipid peroxidase inhibitor               | 0,796   | 0,001 |
| 0,791 | 0,013 | Antineoplastic                           | 0,795   | 0,001 |
| 0,784 | 0,007 | CYP3A inducer                            | 0,795   | 0,001 |
| 0,777 | 0,004 | APOA1 expression enhancer                | 0,792   | 0,002 |
| 0,772 | 0,002 | Morphine 6-dehydrogenase inhibitor       | 0,790   | 0,001 |
| 0,775 | 0,005 | 4-Nitrophenol 2-monooxygenase inhibito   | 0,788   | 0,001 |
| 0,771 | 0,003 | Free radical scavenger                   | 0,789   | 0,004 |
| 0,762 | 0,005 | CYP2B5 substrate                         | 0,784   | 0,002 |
| 0,758 | 0,003 | CYP2C8 inhibitor                         | 0,800   | 0,019 |
| 0,759 | 0,005 | UGT1A6 substrate                         | 0,782   | 0,001 |
| 0,755 | 0,002 | 3-Methylbutanal reductase inhibitor      | 0,784   | 0,006 |
| 0,754 | 0,002 | UGT2B15 substrate                        | 0,779   | 0,002 |
| 0,753 | 0,005 | Cholestanetriol 26-monooxygenase inhibi  | 0,780   | 0,003 |
| 0,749 | 0,002 | Xanthine oxidase inhibitor               | 0,778   | 0,002 |
| 0,745 | 0,002 | SULT1A3 substrate                        | 0,773   | 0,007 |
| 0,738 | 0,005 | MMP9 expression inhibitor                | 0,761   | 0,004 |
| 0,745 | 0,013 | JAK2 expression inhibitor                | 0,747   | 0,004 |
| 0,722 | 0,003 | Interleukin 4 antagonist                 | 0,752   | 0,013 |
| 0,722 | 0,004 | Malate dehydrogenase inhibitor           | 0,774   | 0,041 |
| 0,722 | 0,004 | UGT2B substrate                          | 0,737   | 0,006 |
| 0,716 | 0,004 | Monophenol monooxygenase inhibitor       | 0,734   | 0,005 |
| 0,715 | 0,004 | Histamine release stimulant              | 0,723   | 0,004 |
| 0,713 | 0,003 | CF transmembrane conductance regulato    | 0,733   | 0,014 |
| 0,714 | 0,005 | CYP2A4 substrate                         | 0,721   | 0,007 |
| 0,727 | 0,019 | Dehydro-L-gulonate decarboxylase inhibi  | 0,713   | 0,004 |
| 0,711 | 0,004 | Pectate lyase inhibitor                  | 0,711   | 0,002 |
| 0,715 | 0,008 | Anticarcinogenic                         | 0,710   | 0,003 |

|       |       |                                           |       |       |
|-------|-------|-------------------------------------------|-------|-------|
| 0,709 | 0,004 | Leukotriene-B4 20-monooxygenase inhib     | 0,720 | 0,013 |
| 0,705 | 0,001 | Capillary fragility treatment             | 0,708 | 0,004 |
| 0,707 | 0,004 | Beta glucuronidase inhibitor              | 0,705 | 0,001 |
| 0,716 | 0,015 | CYP2C substrate                           | 0,744 | 0,041 |
| 0,738 | 0,040 | Mucomembranous protector                  | 0,694 | 0,003 |
| 0,710 | 0,015 | Alkane 1-monooxygenase inhibitor          | 0,702 | 0,012 |
| 0,699 | 0,005 | Sulfotransferase substrate                | 0,696 | 0,007 |
| 0,691 | 0,002 | Glutathione-disulfide reductase inhibitor | 0,698 | 0,009 |
| 0,691 | 0,004 | Plastoquinol-plastocyanin reductase inhik | 0,728 | 0,044 |
| 0,700 | 0,012 | CYP2C9 substrate                          | 0,695 | 0,013 |
| 0,692 | 0,005 | Histamine release inhibitor               | 0,682 | 0,005 |
| 0,682 | 0,001 | 3-Oxoacyl-[acyl-carrier-protein] synthase | 0,679 | 0,005 |
| 0,723 | 0,048 | Testosterone 17beta-dehydrogenase (NA     | 0,677 | 0,004 |
| 0,675 | 0,001 | Xanthine dehydrogenase inhibitor          | 0,670 | 0,001 |
| 0,690 | 0,020 | Glutathione thiolesterase inhibitor       | 0,670 | 0,002 |
| 0,672 | 0,005 | UGT2B12 substrate                         | 0,668 | 0,005 |
| 0,669 | 0,002 | RELA expression inhibitor                 | 0,664 | 0,003 |
| 0,667 | 0,002 | Astringent                                | 0,649 | 0,001 |
| 0,663 | 0,001 | Hydroxysteroid dehydrogenase inhibitor    | 0,653 | 0,009 |
| 0,670 | 0,008 | Hepatoprotectant                          | 0,694 | 0,052 |
| 0,669 | 0,008 | Chemopreventive                           | 0,645 | 0,008 |
| 0,676 | 0,019 | Antiinflammatory                          | 0,642 | 0,009 |
| 0,663 | 0,006 | Tetrahydroxynaphthalene reductase inhik   | 0,641 | 0,009 |
| 0,657 | 0,004 | 4-Coumarate-CoA ligase inhibitor          | 0,650 | 0,019 |
| 0,672 | 0,023 | Glucan endo-1,6-beta-glucosidase inhibiti | 0,633 | 0,005 |
| 0,660 | 0,012 | CYP2A6 substrate                          | 0,659 | 0,044 |
| 0,698 | 0,051 | CYP2J substrate                           | 0,622 | 0,006 |
| 0,647 | 0,005 | Trans-1,2-dihydrobenzene-1,2-diol dehyd   | 0,622 | 0,009 |
| 0,652 | 0,014 | NAD(P)+-arginine ADP-ribosyltransferase   | 0,618 | 0,005 |
| 0,638 | 0,004 | Chemoprotective                           | 0,631 | 0,020 |
| 0,641 | 0,009 | Reductant                                 | 0,603 | 0,001 |
| 0,690 | 0,062 | Gluconate 2-dehydrogenase (acceptor) in   | 0,634 | 0,035 |
| 0,646 | 0,019 | CYP2B6 substrate                          | 0,615 | 0,016 |
| 0,637 | 0,013 | Pin1 inhibitor                            | 0,597 | 0,002 |
| 0,665 | 0,042 | CYP2J2 substrate                          | 0,595 | 0,003 |
| 0,623 | 0,001 | Beta-N-acetylhexosaminidase inhibitor     | 0,592 | 0,002 |
| 0,641 | 0,020 | Thioredoxin inhibitor                     | 0,620 | 0,032 |
| 0,622 | 0,009 | 5 Hydroxytryptamine release inhibitor     | 0,602 | 0,015 |
| 0,631 | 0,019 | Cytoprotectant                            | 0,588 | 0,002 |
| 0,626 | 0,016 | CYP2A substrate                           | 0,597 | 0,016 |
| 0,602 | 0,002 | Histidinol dehydrogenase inhibitor        | 0,634 | 0,054 |
| 0,640 | 0,046 | Sugar-phosphatase inhibitor               | 0,603 | 0,024 |
| 0,615 | 0,022 | Insulysin inhibitor                       | 0,590 | 0,011 |
| 0,596 | 0,003 | DNA ligase (ATP) inhibitor                | 0,581 | 0,006 |
| 0,602 | 0,010 | Proliferative diseases treatment          | 0,569 | 0,002 |
| 0,606 | 0,015 | CYP2A2 substrate                          | 0,578 | 0,012 |
| 0,605 | 0,014 | CYP2C11 substrate                         | 0,567 | 0,003 |

|       |       |                                                   |       |       |
|-------|-------|---------------------------------------------------|-------|-------|
| 0,628 | 0,040 | NADPH peroxidase inhibitor                        | 0,583 | 0,021 |
| 0,623 | 0,036 | CYP3A4 substrate                                  | 0,586 | 0,025 |
| 0,599 | 0,012 | Neurotransmitter antagonist                       | 0,564 | 0,004 |
| 0,638 | 0,051 | Fibrinolytic                                      | 0,564 | 0,004 |
| 0,597 | 0,011 | CYP2A11 substrate                                 | 0,562 | 0,003 |
| 0,611 | 0,025 | CYP3A2 substrate                                  | 0,567 | 0,009 |
| 0,598 | 0,012 | Platelet adhesion inhibitor                       | 0,560 | 0,002 |
| 0,590 | 0,004 | Nitric oxide antagonist                           | 0,597 | 0,040 |
| 0,588 | 0,004 | Alcohol dehydrogenase inhibitor                   | 0,567 | 0,016 |
| 0,583 | 0,001 | Histone deacetylase SIRT2 stimulant               | 0,555 | 0,004 |
| 0,613 | 0,033 | NADPH-cytochrome-c2 reductase inhibitor           | 0,553 | 0,003 |
| 0,610 | 0,033 | Oxidoreductase inhibitor                          | 0,604 | 0,054 |
| 0,591 | 0,015 | CYP2F1 substrate                                  | 0,558 | 0,008 |
| 0,583 | 0,009 | Nitrite reductase [NAD(P)H] inhibitor             | 0,566 | 0,017 |
| 0,575 | 0,004 | CYP1B substrate                                   | 0,562 | 0,016 |
| 0,607 | 0,038 | Kidney function stimulant                         | 0,549 | 0,005 |
| 0,579 | 0,009 | 5 Hydroxytryptamine uptake stimulant              | 0,566 | 0,025 |
| 0,574 | 0,004 | UGT1A7 substrate                                  | 0,567 | 0,026 |
| 0,590 | 0,022 | Ecdysone 20-monooxygenase inhibitor               | 0,582 | 0,043 |
| 0,575 | 0,010 | Glyoxylate oxidase inhibitor                      | 0,557 | 0,018 |
| 0,571 | 0,006 | 2,6-Dihydroxypyridine 3-monooxygenase             | 0,550 | 0,012 |
| 0,585 | 0,024 | Lipid metabolism regulator                        | 0,578 | 0,041 |
| 0,590 | 0,029 | Nitrate reductase (cytochrome) inhibitor          | 0,541 | 0,004 |
| 0,599 | 0,041 | Ribulose-phosphate 3-epimerase inhibitor          | 0,543 | 0,009 |
| 0,563 | 0,005 | CYP2A5 substrate                                  | 0,583 | 0,049 |
| 0,557 | 0,002 | Severe acute respiratory syndrome treatment       | 0,631 | 0,100 |
| 0,566 | 0,013 | Antineoplastic (breast cancer)                    | 0,568 | 0,041 |
| 0,592 | 0,040 | CYP3A substrate                                   | 0,530 | 0,003 |
| 0,556 | 0,004 | NF-E2-related factor 2 stimulant                  | 0,566 | 0,042 |
| 0,553 | 0,003 | DOPA decarboxylase inhibitor                      | 0,525 | 0,005 |
| 0,566 | 0,017 | Steroid N-acetylglucosaminyltransferase inhibitor | 0,524 | 0,005 |
| 0,548 | 0,003 | Lactoylglutathione lyase inhibitor                | 0,522 | 0,004 |
| 0,560 | 0,015 | 3-Phytase inhibitor                               | 0,520 | 0,005 |
| 0,579 | 0,034 | Feruloyl esterase inhibitor                       | 0,537 | 0,022 |
| 0,586 | 0,042 | Complement factor D inhibitor                     | 0,541 | 0,026 |
| 0,567 | 0,024 | Radiosensitizer                                   | 0,565 | 0,051 |
| 0,554 | 0,011 | 1-Acylglycerol-3-phosphate O-acyltransferase      | 0,519 | 0,004 |
| 0,609 | 0,067 | Nicotinic alpha6beta3beta4alpha5 receptor         | 0,547 | 0,033 |
| 0,544 | 0,004 | Estrogen receptor beta antagonist                 | 0,513 | 0,001 |
| 0,543 | 0,004 | Estrogen antagonist                               | 0,547 | 0,036 |
| 0,596 | 0,057 | Taurine dehydrogenase inhibitor                   | 0,515 | 0,004 |
| 0,542 | 0,003 | Skin whitener                                     | 0,529 | 0,022 |
| 0,556 | 0,017 | Peptide alpha-N-acetyltransferase inhibitor       | 0,510 | 0,003 |
| 0,566 | 0,028 | Alopecia treatment                                | 0,530 | 0,024 |
| 0,543 | 0,007 | CYP3A7 substrate                                  | 0,546 | 0,040 |
| 0,554 | 0,018 | Antiprotozoal (Leishmania)                        | 0,543 | 0,038 |
| 0,544 | 0,009 | CYP2C9 inducer                                    | 0,517 | 0,013 |



|       |       |                                          |       |       |
|-------|-------|------------------------------------------|-------|-------|
| 0,539 | 0,005 | Maillard reaction inhibitor              | 0,506 | 0,005 |
| 0,538 | 0,004 | MAO inhibitor                            | 0,503 | 0,003 |
| 0,543 | 0,009 | CYP2G1 substrate                         | 0,540 | 0,040 |
| 0,567 | 0,032 | Fatty-acyl-CoA synthase inhibitor        | 0,544 | 0,044 |
| 0,534 | 0,003 | MAO A inhibitor                          | 0,510 | 0,010 |
| 0,534 | 0,003 | Thyroxine 5-deiodinase inhibitor         | 0,504 | 0,004 |
| 0,545 | 0,017 | Cis-1,2-dihydro-1,2-dihydroxynaphthalen  | 0,521 | 0,022 |
| 0,531 | 0,003 | GABA C receptor antagonist               | 0,516 | 0,016 |
| 0,541 | 0,014 | 4-Methoxybenzoate monooxygenase (O-      | 0,510 | 0,012 |
| 0,555 | 0,028 | Aminobutyraldehyde dehydrogenase inhi    | 0,500 | 0,005 |
| 0,549 | 0,024 | CYP2A1 substrate                         | 0,530 | 0,036 |
| 0,531 | 0,005 | HCV IRES inhibitor                       | 0,496 | 0,005 |
| 0,530 | 0,004 | Aryl hydrocarbon receptor agonist        | 0,500 | 0,010 |
| 0,528 | 0,003 | Melanin inhibitor                        | 0,501 | 0,011 |
| 0,537 | 0,015 | Sulfite oxidase inhibitor                | 0,528 | 0,040 |
| 0,554 | 0,034 | Oxygen scavenger                         | 0,486 | 0,002 |
| 0,538 | 0,022 | Radioprotector                           | 0,488 | 0,007 |
| 0,518 | 0,003 | Pim-1 kinase inhibitor                   | 0,504 | 0,025 |
| 0,543 | 0,033 | CYP3A1 substrate                         | 0,508 | 0,029 |
| 0,552 | 0,043 | UDP-N-acetylglucosamine 4-epimerase in   | 0,479 | 0,004 |
| 0,510 | 0,002 | NAD(P)H dehydrogenase (quinone) inhibi   | 0,518 | 0,043 |
| 0,518 | 0,011 | 2,3-Dihydroxyindole 2,3-dioxygenase inhi | 0,491 | 0,019 |
| 0,567 | 0,065 | Glutamyl endopeptidase II inhibitor      | 0,482 | 0,012 |
| 0,505 | 0,005 | Estrogen agonist                         | 0,518 | 0,048 |
| 0,559 | 0,060 | 5-O-(4-coumaroyl)-D-quinat 3'-monooxy    | 0,471 | 0,003 |
| 0,520 | 0,022 | Cytostatic                               | 0,471 | 0,003 |
| 0,545 | 0,048 | Acetylcholine neuromuscular blocking ag  | 0,501 | 0,033 |
| 0,508 | 0,011 | GST M substrate                          | 0,500 | 0,033 |
| 0,509 | 0,012 | Quinoprotein glucose dehydrogenase inh   | 0,527 | 0,061 |
| 0,518 | 0,022 | Threonine aldolase inhibitor             | 0,484 | 0,018 |
| 0,510 | 0,015 | Gonadotropin antagonist                  | 0,475 | 0,013 |
| 0,505 | 0,011 | Hepatic disorders treatment              | 0,473 | 0,012 |
| 0,500 | 0,007 | CYP2A3 substrate                         | 0,514 | 0,053 |
| 0,530 | 0,037 | Membrane integrity antagonist            | 0,497 | 0,039 |
| 0,495 | 0,003 | Histone deacetylase stimulant            | 0,534 | 0,078 |
| 0,495 | 0,003 | Histone deacetylase SIRT1 stimulant      | 0,510 | 0,054 |
| 0,496 | 0,005 | Antiviral (Hepatitis B)                  | 0,459 | 0,005 |
| 0,527 | 0,037 | Trans-acenaphthene-1,2-diol dehydrogen   | 0,474 | 0,020 |
| 0,501 | 0,013 | Transcription factor inhibitor           | 0,498 | 0,045 |
| 0,501 | 0,013 | Magnesium-protoporphyrin IX monometl     | 0,455 | 0,002 |
| 0,532 | 0,044 | 2-Hydroxyquinoline 8-monooxygenase inl   | 0,456 | 0,003 |
| 0,505 | 0,021 | Antihypercholesterolemic                 | 0,475 | 0,025 |
| 0,489 | 0,007 | Endopeptidase La inhibitor               | 0,453 | 0,003 |
| 0,502 | 0,021 | Vasodilator                              | 0,524 | 0,074 |
| 0,481 | 0,004 | Pyruvate kinase inhibitor                | 0,494 | 0,045 |
| 0,490 | 0,014 | Antiseptic                               | 0,452 | 0,004 |
| 0,478 | 0,003 | SULT1E1 substrate                        | 0,467 | 0,020 |

|       |       |                                          |       |       |
|-------|-------|------------------------------------------|-------|-------|
| 0,561 | 0,088 | Chymosin inhibitor                       | 0,463 | 0,018 |
| 0,561 | 0,088 | Acrocyllindropepsin inhibitor            | 0,470 | 0,026 |
| 0,561 | 0,088 | Saccharopepsin inhibitor                 | 0,492 | 0,051 |
| 0,483 | 0,012 | Antiviral (Herpes)                       | 0,452 | 0,011 |
| 0,496 | 0,026 | CYP2B substrate                          | 0,443 | 0,004 |
| 0,474 | 0,005 | Antidote                                 | 0,444 | 0,004 |
| 0,472 | 0,005 | CTGF expression inhibitor                | 0,464 | 0,026 |
| 0,496 | 0,030 | CYP2C19 substrate                        | 0,439 | 0,005 |
| 0,548 | 0,082 | Glycosylphosphatidylinositol phospholipa | 0,436 | 0,003 |
| 0,495 | 0,031 | Antifungal                               | 0,443 | 0,010 |
| 0,487 | 0,026 | Antiulcerative                           | 0,436 | 0,005 |
| 0,465 | 0,003 | Telomerase inhibitor                     | 0,435 | 0,004 |
| 0,523 | 0,063 | Phthalate 4,5-dioxygenase inhibitor      | 0,433 | 0,002 |
| 0,463 | 0,005 | Antineoplastic (small cell lung cancer)  | 0,440 | 0,011 |
| 0,538 | 0,083 | Phosphatase inhibitor                    | 0,432 | 0,004 |
| 0,483 | 0,028 | Vasodilator, coronary                    | 0,456 | 0,028 |
| 0,470 | 0,016 | Hydroxylamine reductase (NADH) inhibitc  | 0,441 | 0,013 |
| 0,466 | 0,012 | RNA directed DNA polymerase inhibitor    | 0,445 | 0,017 |
| 0,456 | 0,003 | Estrone sulfotransferase inhibitor       | 0,478 | 0,050 |
| 0,473 | 0,021 | CYP2E substrate                          | 0,445 | 0,017 |
| 0,456 | 0,004 | Nav1.5 sodium channel blocker            | 0,432 | 0,004 |
| 0,453 | 0,001 | Fatty acid synthase inhibitor            | 0,489 | 0,063 |
| 0,489 | 0,038 | 3-Hydroxybenzoate 6-monooxygenase inl    | 0,510 | 0,085 |
| 0,459 | 0,009 | CYP2C6 substrate                         | 0,452 | 0,026 |
| 0,482 | 0,033 | Nicotine dehydrogenase inhibitor         | 0,437 | 0,012 |
| 0,461 | 0,013 | Antiprotozoal                            | 0,462 | 0,039 |
| 0,452 | 0,006 | P-glycoprotein inhibitor                 | 0,424 | 0,003 |
| 0,466 | 0,020 | Salicylate 1-monooxygenase inhibitor     | 0,446 | 0,028 |
| 0,458 | 0,012 | Choleretic                               | 0,421 | 0,005 |
| 0,453 | 0,009 | CYP1A2 inducer                           | 0,433 | 0,016 |
| 0,462 | 0,021 | Mediator release inhibitor               | 0,431 | 0,015 |
| 0,476 | 0,035 | TNF expression inhibitor                 | 0,449 | 0,036 |
| 0,445 | 0,005 | CYP1B1 substrate                         | 0,422 | 0,010 |
| 0,443 | 0,003 | 15-Lipoxygenase inhibitor                | 0,430 | 0,019 |
| 0,506 | 0,066 | Platelet aggregation stimulant           | 0,452 | 0,041 |
| 0,479 | 0,040 | Aspartate-phenylpyruvate transaminase i  | 0,444 | 0,034 |
| 0,482 | 0,044 | Manganese peroxidase inhibitor           | 0,432 | 0,023 |
| 0,518 | 0,081 | Fusarinine-C ornithinesterase inhibitor  | 0,418 | 0,010 |
| 0,441 | 0,004 | MO15-related protein kinase Pfmrk inhibi | 0,417 | 0,009 |
| 0,473 | 0,036 | Arylsulfate sulfotransferase inhibitor   | 0,415 | 0,007 |
| 0,444 | 0,009 | Vascular (periferal) disease treatment   | 0,431 | 0,029 |
| 0,436 | 0,003 | Aldose reductase inhibitor               | 0,413 | 0,012 |
| 0,447 | 0,014 | UGT1A4 substrate                         | 0,435 | 0,035 |
| 0,475 | 0,043 | CYP2D16 substrate                        | 0,419 | 0,019 |
| 0,458 | 0,027 | Dextranase inhibitor                     | 0,416 | 0,016 |
| 0,467 | 0,038 | Mannan endo-1,4-beta-mannosidase inhi    | 0,406 | 0,009 |
| 0,430 | 0,002 | Demethylsterigmatocystin 6-O-methyltra   | 0,417 | 0,021 |

|       |       |                                            |       |       |
|-------|-------|--------------------------------------------|-------|-------|
| 0,442 | 0,014 | Myosin ATPase inhibitor                    | 0,421 | 0,025 |
| 0,450 | 0,023 | Hyponitrite reductase inhibitor            | 0,404 | 0,008 |
| 0,448 | 0,022 | CYP2E1 substrate                           | 0,482 | 0,086 |
| 0,475 | 0,051 | Antipruritic, allergic                     | 0,445 | 0,049 |
| 0,482 | 0,060 | Preneoplastic conditions treatment         | 0,427 | 0,033 |
| 0,442 | 0,020 | Antileukemic                               | 0,397 | 0,005 |
| 0,438 | 0,016 | CYP2B11 substrate                          | 0,427 | 0,037 |
| 0,425 | 0,003 | Phosphoenolpyruvate carboxylase inhibit    | 0,393 | 0,002 |
| 0,456 | 0,035 | Caspase 3 stimulant                        | 0,394 | 0,004 |
| 0,435 | 0,014 | Vitamin-K-epoxide reductase (warfarin-in   | 0,487 | 0,098 |
| 0,474 | 0,053 | Glucose oxidase inhibitor                  | 0,435 | 0,047 |
| 0,439 | 0,019 | UGT2B4 substrate                           | 0,405 | 0,018 |
| 0,445 | 0,026 | EIF4E expression inhibitor                 | 0,410 | 0,024 |
| 0,483 | 0,065 | Alkenylglycerophosphocholine hydrolase     | 0,398 | 0,012 |
| 0,437 | 0,021 | Clavamate synthase inhibitor               | 0,428 | 0,042 |
| 0,448 | 0,033 | N-hydroxyarylamine O-acetyltransferase     | 0,394 | 0,009 |
| 0,480 | 0,065 | Carboxypeptidase Taq inhibitor             | 0,391 | 0,007 |
| 0,461 | 0,047 | CYP2C8 substrate                           | 0,387 | 0,006 |
| 0,446 | 0,033 | Chemosensitizer                            | 0,421 | 0,041 |
| 0,442 | 0,029 | Corticosteroid side-chain-isomerase inhib  | 0,430 | 0,052 |
| 0,429 | 0,018 | Prostate cancer treatment                  | 0,404 | 0,026 |
| 0,442 | 0,034 | GABA aminotransferase inhibitor            | 0,467 | 0,090 |
| 0,461 | 0,053 | Thromboxane B2 antagonist                  | 0,429 | 0,054 |
| 0,440 | 0,034 | CYP2E1 inducer                             | 0,376 | 0,003 |
| 0,408 | 0,004 | Dual specificity phosphatase 1 inhibitor   | 0,381 | 0,009 |
| 0,464 | 0,060 | (R)-6-hydroxynicotine oxidase inhibitor    | 0,379 | 0,007 |
| 0,490 | 0,086 | Calcium channel (voltage-sensitive) activa | 0,374 | 0,005 |
| 0,482 | 0,079 | Mucositis treatment                        | 0,414 | 0,046 |
| 0,474 | 0,072 | Ovulation inhibitor                        | 0,371 | 0,004 |
| 0,443 | 0,041 | Gamma-guanidinobutyraldehyde dehydr        | 0,376 | 0,008 |
| 0,443 | 0,042 | Hydroxylamine oxidase inhibitor            | 0,403 | 0,036 |
| 0,451 | 0,050 | Linoleate diol synthase inhibitor          | 0,372 | 0,007 |
| 0,454 | 0,054 | Trimethylamine-oxide aldolase inhibitor    | 0,436 | 0,072 |
| 0,419 | 0,021 | Antiosteoporotic                           | 0,368 | 0,005 |
| 0,442 | 0,044 | Lactase inhibitor                          | 0,392 | 0,029 |
| 0,406 | 0,008 | Phloroglucinol reductase inhibitor         | 0,365 | 0,003 |
| 0,423 | 0,026 | Antiparasitic                              | 0,371 | 0,010 |
| 0,404 | 0,007 | CYP2A10 substrate                          | 0,366 | 0,004 |
| 0,477 | 0,080 | Protein-disulfide reductase (glutathione)  | 0,418 | 0,058 |
| 0,473 | 0,077 | Electron-transferring-flavoprotein dehydr  | 0,425 | 0,066 |
| 0,400 | 0,004 | Proteasome endopeptidase complex inhib     | 0,406 | 0,048 |
| 0,421 | 0,026 | Antituberculosic                           | 0,362 | 0,004 |
| 0,411 | 0,015 | Dihydroxy-acid dehydratase inhibitor       | 0,448 | 0,091 |
| 0,441 | 0,046 | Malate dehydrogenase (acceptor) inhibit    | 0,396 | 0,041 |
| 0,436 | 0,042 | Spasmolytic                                | 0,359 | 0,004 |
| 0,437 | 0,043 | Antiallergic                               | 0,378 | 0,024 |
| 0,427 | 0,033 | Antimycobacterial                          | 0,356 | 0,002 |

|       |       |                                            |         |       |
|-------|-------|--------------------------------------------|---------|-------|
| 0,424 | 0,033 | N-methylhydantoinase (ATP-hydrolysing)     | 0,400   | 0,046 |
| 0,447 | 0,056 | Sulfur reductase inhibitor                 | 0,434   | 0,081 |
| 0,406 | 0,016 | 3-Demethylubiquinone-9 3-O-methyltran      | 0,370   | 0,018 |
| 0,396 | 0,006 | Alkaline phosphatase inhibitor             | 0,403   | 0,052 |
| 0,393 | 0,003 | Cyclin-dependent kinase 6 inhibitor        | 0,354   | 0,004 |
| 0,430 | 0,043 | Glucan 1,4-alpha-maltotriohydrolase inhibi | 0,375   | 0,026 |
| 0,392 | 0,004 | P-glycoprotein 1 inhibitor                 | 0,357   | 0,009 |
| 0,404 | 0,018 | Angiogenesis stimulant                     | 0,441   | 0,093 |
| 0,396 | 0,010 | Photosensitizer                            | 0,404   | 0,057 |
| 0,426 | 0,040 | tRNA-pseudouridine synthase I inhibitor    | 0,400   | 0,052 |
| 0,425 | 0,039 | Menopausal disorders treatment             | 0,354   | 0,008 |
| 0,485 | 0,100 | Pseudolysin inhibitor                      | 0,479   | 0,133 |
| 0,420 | 0,035 | Anthelmintic (Nematodes)                   | 0,384   | 0,039 |
| 0,449 | 0,066 | 1,4-Lactonase inhibitor                    | 0,446   | 0,101 |
| 0,396 | 0,015 | Glutaminase inhibitor                      | 0,392   | 0,047 |
| 0,432 | 0,051 | Nucleotide metabolism regulator            | 7 0,410 | 0,068 |
| 0,396 | 0,016 | Vomilenine glucosyltransferase inhibitor   | 0,402   | 0,060 |
| 0,422 | 0,042 | Lysostaphin inhibitor                      | 0,377   | 0,035 |
| 0,383 | 0,004 | Gout treatment                             | 0,408   | 0,066 |
| 0,425 | 0,049 | CYP2D6 substrate                           | 0,393   | 0,052 |
| 0,391 | 0,016 | Proto-oncogene tyrosine-protein kinase F   | 0,351   | 0,013 |
| 0,401 | 0,028 | Carminative                                | 0,347   | 0,009 |
| 0,376 | 0,004 | SULT1A1 substrate                          | 0,371   | 0,035 |
| 0,397 | 0,025 | Cytochrome P450 inhibitor                  | 0,343   | 0,010 |
| 0,405 | 0,033 | 4-Hydroxyphenylacetate 3-monooxygena       | 0,389   | 0,057 |
| 0,375 | 0,005 | Lipoxygenase inhibitor                     | 0,386   | 0,057 |
| 0,440 | 0,072 | Fructose 5-dehydrogenase inhibitor         | 0,377   | 0,048 |
| 0,374 | 0,007 | Histidine decarboxylase inhibitor          | 0,352   | 0,023 |
| 0,377 | 0,012 | Phenylpyruvate decarboxylase inhibitor     | 0,337   | 0,009 |
| 0,373 | 0,007 | Laxative                                   | 0,457   | 0,133 |
| 0,369 | 0,005 | Catechol 1,2-dioxygenase inhibitor         | 0,457   | 0,133 |
| 0,395 | 0,031 | Antibacterial                              | 0,457   | 0,133 |
| 0,402 | 0,038 | Antiprotozoal (Trypanosoma)                | 0,386   | 0,062 |
| 0,439 | 0,074 | GST A substrate                            | 0,392   | 0,068 |
| 0,377 | 0,013 | Phenol 2-monooxygenase inhibitor           | 0,331   | 0,009 |
| 0,400 | 0,037 | Leukotriene-C4 synthase inhibitor          | 0,402   | 0,080 |
| 0,412 | 0,049 | Rubredoxin-NAD+ reductase inhibitor        | 0,396   | 0,075 |
| 0,429 | 0,067 | Arginine 2-monooxygenase inhibitor         | 0,334   | 0,014 |
| 0,431 | 0,069 | Pterin deaminase inhibitor                 | 0,321   | 0,003 |
| 0,366 | 0,004 | Protein kinase (CK2) inhibitor             | 0,397   | 0,080 |
| 0,388 | 0,026 | Opioid kappa 3 receptor antagonist         | 0,390   | 0,073 |
| 0,384 | 0,023 | Glycerol 2-dehydrogenase (NADP+) inhibi    | 0,354   | 0,037 |
| 0,426 | 0,066 | 5 Hydroxytryptamine release stimulant      | 0,340   | 0,024 |
| 0,427 | 0,067 | Octopamine antagonist                      | 0,375   | 0,059 |
| 0,414 | 0,057 | Methylenetetrahydrofolate reductase (N/    | 0,393   | 0,079 |
| 0,404 | 0,047 | Prostaglandin-A1 DELTA-isomerase inhibi    | 0,322   | 0,009 |
| 0,408 | 0,052 | CYP2D substrate                            | 0,438   | 0,126 |

|       |       |                                            |       |       |
|-------|-------|--------------------------------------------|-------|-------|
| 0,372 | 0,016 | Antidiabetic symptomatic                   | 0,332 | 0,021 |
| 0,431 | 0,076 | Phosphatidylcholine-retinol O-acyltransfe  | 0,454 | 0,144 |
| 0,359 | 0,004 | Estradiol 17 beta dehydrogenase inhibito   | 0,359 | 0,048 |
| 0,382 | 0,028 | Bone diseases treatment                    | 0,406 | 0,096 |
| 0,400 | 0,047 | Antiviral (Influenza)                      | 0,401 | 0,093 |
| 0,438 | 0,085 | Glucan endo-1,3-beta-D-glucosidase inhibi  | 0,334 | 0,026 |
| 0,378 | 0,025 | CDP-diacylglycerol-glycerol-3-phosphate    | 0,350 | 0,044 |
| 0,387 | 0,036 | Carbon-monoxide dehydrogenase inhibitor    | 0,390 | 0,085 |
| 0,366 | 0,015 | CYP2A6 inhibitor                           | 0,309 | 0,005 |
| 0,355 | 0,004 | Sepiapterin reductase inhibitor            | 0,370 | 0,068 |
| 0,381 | 0,030 | Succinate-semialdehyde dehydrogenase [     | 0,343 | 0,041 |
| 0,375 | 0,025 | Non-steroidal antiinflammatory agent       | 0,415 | 0,114 |
| 0,391 | 0,041 | Nitrite reductase (NO-forming) inhibitor   | 0,337 | 0,037 |
| 0,368 | 0,019 | Prunasin beta-glucosidase inhibitor        | 0,397 | 0,097 |
| 0,433 | 0,084 | Acylcarnitine hydrolase inhibitor          | 0,382 | 0,085 |
| 0,353 | 0,004 | Gastritis treatment                        | 0,410 | 0,113 |
| 0,433 | 0,085 | Lysase inhibitor                           | 0,302 | 0,005 |
| 0,365 | 0,018 | UGT2B28 substrate                          | 0,371 | 0,074 |
| 0,361 | 0,014 | Gentisate 1,2-dioxygenase inhibitor        | 0,341 | 0,045 |
| 0,388 | 0,041 | Retinoic acid metabolism inhibitor         | 0,307 | 0,011 |
| 0,359 | 0,012 | CYP2C8 inducer                             | 0,298 | 0,003 |
| 0,399 | 0,053 | Caspase 8 stimulant                        | 0,320 | 0,026 |
| 0,355 | 0,010 | Dual specificity phosphatase inhibitor     | 0,416 | 0,121 |
| 0,358 | 0,014 | Anti-Helicobacter pylori                   | 0,327 | 0,033 |
| 0,396 | 0,054 | Mycothioliol-S-conjugate amidase inhibitor | 0,384 | 0,091 |
| 0,366 | 0,024 | CYP2B10 substrate                          | 0,354 | 0,063 |
| 0,438 | 0,095 | Macrophage colony stimulating factor ag    | 0,373 | 0,082 |
| 0,407 | 0,066 | Respiratory analeptic                      | 0,390 | 0,099 |
| 0,344 | 0,004 | Pim kinase inhibitor                       | 0,314 | 0,024 |
| 0,366 | 0,027 | Protein-Npi-phosphohistidine-sugar phos    | 0,320 | 0,031 |
| 0,355 | 0,017 | (S)-3-hydroxyacid ester dehydrogenase in   | 0,309 | 0,019 |
| 0,400 | 0,062 | Formaldehyde transketolase inhibitor       | 0,344 | 0,056 |
| 0,409 | 0,072 | Hydrogen dehydrogenase inhibitor           | 0,325 | 0,037 |
| 0,376 | 0,039 | CYP7 inhibitor                             | 0,320 | 0,033 |
| 0,367 | 0,031 | Indanol dehydrogenase inhibitor            | 0,350 | 0,063 |
| 0,345 | 0,009 | Antiprotozoal (Plasmodium)                 | 0,306 | 0,020 |
| 0,429 | 0,094 | Phospholipid-translocating ATPase inhibi   | 0,398 | 0,113 |
| 0,436 | 0,102 | Nicotinic alpha2beta2 receptor antagonis   | 0,384 | 0,100 |
| 0,348 | 0,015 | CYP2B2 substrate                           | 0,297 | 0,013 |
| 0,364 | 0,030 | Linoleoyl-CoA desaturase inhibitor         | 0,286 | 0,002 |
| 0,396 | 0,063 | Acetylgalactosaminyl-O-glycosyl-glycopro   | 0,389 | 0,105 |
| 0,342 | 0,009 | Protein phosphatase inhibitor              | 0,287 | 0,003 |
| 0,389 | 0,056 | Glycerol-3-phosphate oxidase inhibitor     | 0,360 | 0,078 |
| 0,416 | 0,083 | Leukopoiesis stimulant                     | 0,284 | 0,002 |
| 0,416 | 0,084 | Alkylacetyllycerophosphatase inhibitor     | 0,318 | 0,036 |
| 0,357 | 0,027 | Peroxidase substrate                       | 0,352 | 0,070 |
| 0,388 | 0,057 | FMO1 substrate                             | 0,301 | 0,020 |

|       |       |                                            |       |       |
|-------|-------|--------------------------------------------|-------|-------|
| 0,364 | 0,035 | Sulfite reductase inhibitor                | 0,312 | 0,031 |
| 0,392 | 0,063 | L-glutamate oxidase inhibitor              | 0,322 | 0,042 |
| 0,330 | 0,003 | Estradiol 17 beta dehydrogenase 2 inhibit  | 0,311 | 0,031 |
| 0,341 | 0,014 | Antineoplastic (cervical cancer)           | 0,378 | 0,099 |
| 0,389 | 0,062 | (S)-6-hydroxynicotine oxidase inhibitor    | 0,380 | 0,103 |
| 0,334 | 0,008 | Protein-tyrosine phosphatase inhibitor     | 0,347 | 0,070 |
| 0,328 | 0,002 | Breast cancer-resistant protein inhibitor  | 0,338 | 0,062 |
| 0,339 | 0,014 | Aldehyde dehydrogenase inhibitor           | 0,310 | 0,034 |
| 0,362 | 0,037 | Para amino benzoic acid antagonist         | 0,325 | 0,049 |
| 0,386 | 0,062 | Alkenylglycerophosphoethanolamine hyd      | 0,351 | 0,076 |
| 0,373 | 0,049 | Phosphopantothenoilcysteine decarboxy      | 0,282 | 0,007 |
| 0,389 | 0,065 | Gluconate 5-dehydrogenase inhibitor        | 0,346 | 0,070 |
| 0,327 | 0,005 | Protein kinase stimulant                   | 0,317 | 0,042 |
| 0,329 | 0,008 | Antifibrinolytic                           | 0,279 | 0,004 |
| 0,348 | 0,027 | Antitussive                                | 0,321 | 0,047 |
| 0,379 | 0,059 | Mucinamylserine mucinamidase inhib         | 0,384 | 0,111 |
| 0,346 | 0,027 | 3-Hydroxy-4-oxoquinoline 2,4-dioxygenase   | 0,358 | 0,086 |
| 0,395 | 0,076 | CYP2D15 substrate                          | 0,302 | 0,031 |
| 0,362 | 0,043 | NADH kinase inhibitor                      | 0,276 | 0,005 |
| 0,379 | 0,061 | Peptidoglycan glycosyltransferase inhibi   | 0,340 | 0,070 |
| 0,409 | 0,090 | Venombin AB inhibitor                      | 0,350 | 0,079 |
| 0,349 | 0,031 | RNA synthesis inhibitor                    | 0,307 | 0,037 |
| 0,322 | 0,004 | HIV-1 integrase (3'-Processing) inhibitor  | 0,307 | 0,037 |
| 0,412 | 0,094 | Limulus clotting factor B inhibitor        | 0,322 | 0,052 |
| 0,343 | 0,026 | CYP2C29 substrate                          | 0,310 | 0,040 |
| 0,349 | 0,031 | Antineoplastic (lung cancer)               | 0,307 | 0,037 |
| 0,321 | 0,004 | HIV-1 integrase (Strand Transfer) inhibito | 0,354 | 0,084 |
| 0,341 | 0,026 | Antiuremic                                 | 0,377 | 0,107 |
| 0,358 | 0,043 | Cardiovascular analeptic                   | 0,317 | 0,048 |
| 0,410 | 0,095 | Chloride peroxidase inhibitor              | 0,340 | 0,073 |
| 0,341 | 0,027 | D-amino-acid dehydrogenase inhibitor       | 0,284 | 0,017 |
| 0,328 | 0,014 | Glutathione S-transferase substrate        | 0,381 | 0,115 |
| 0,322 | 0,009 | Guanosine-3',5'-bis(diphosphate) 3'-diph   | 0,381 | 0,116 |
| 0,491 | 0,179 | Phobic disorders treatment                 | 0,311 | 0,048 |
| 0,337 | 0,025 | CYP2E1 inhibitor                           | 0,277 | 0,014 |
| 0,314 | 0,002 | Enoyl-[acyl-carrier-protein] reductase (NA | 0,415 | 0,153 |
| 0,384 | 0,073 | Pancreatic elastase inhibitor              | 0,283 | 0,021 |
| 0,368 | 0,058 | Naphthalene 1,2-dioxygenase inhibitor      | 0,327 | 0,065 |
| 0,368 | 0,058 | Ferredoxin-NAD+ reductase inhibitor        | 0,342 | 0,081 |
| 0,370 | 0,060 | Glyoxylate reductase inhibitor             | 0,349 | 0,088 |
| 0,337 | 0,028 | Tryptophan 2,3-dioxygenase inhibitor       | 0,266 | 0,006 |
| 0,353 | 0,044 | Long-chain-aldehyde dehydrogenase inhi     | 0,292 | 0,032 |
| 0,379 | 0,070 | S-formylglutathione hydrolase inhibitor    | 0,378 | 0,118 |
| 0,331 | 0,023 | MAP kinase kinase 4 inhibitor              | 0,285 | 0,025 |
| 0,310 | 0,002 | CYP26 inhibitor                            | 0,311 | 0,052 |
| 0,432 | 0,124 | Nicotinic alpha4beta4 receptor agonist     | 0,340 | 0,081 |
| 0,339 | 0,031 | ICAM1 expression inhibitor                 | 0,269 | 0,011 |

|       |       |                                          |         |       |
|-------|-------|------------------------------------------|---------|-------|
| 0,377 | 0,069 | Phenol O-methyltransferase inhibitor     | 0,323   | 0,065 |
| 0,328 | 0,021 | Mcl-1 antagonist                         | 0,290   | 0,032 |
| 0,321 | 0,014 | Antineoplastic (sarcoma)                 | 0,342   | 0,084 |
| 0,374 | 0,068 | Dementia treatment                       | 0,292   | 0,035 |
| 0,333 | 0,028 | Antihelmintic                            | 0,272   | 0,016 |
| 0,306 | 0,002 | Aldose reductase 2 inhibitor             | 0,262   | 0,006 |
| 0,321 | 0,016 | 2-Nitropropane dioxygenase inhibitor     | 0,337   | 0,085 |
| 0,367 | 0,063 | CYP2C18 substrate                        | 0,258   | 0,006 |
| 0,354 | 0,050 | Formate-dihydrofolate ligase inhibit     | 8 0,288 | 0,037 |
| 0,372 | 0,069 | CYP3A3 substrate                         | 0,329   | 0,079 |
| 0,331 | 0,028 | Phosphoenolpyruvate mutase inhibitor     | 0,337   | 0,087 |
| 0,376 | 0,073 | Exoribonuclease II inhibitor             | 0,315   | 0,065 |
| 0,315 | 0,013 | Topoisomerase I inhibitor                | 0,348   | 0,098 |
| 0,327 | 0,026 | UGT2B7 substrate                         | 0,281   | 0,032 |
| 0,315 | 0,014 | Keratolytic                              | 0,270   | 0,021 |
| 0,325 | 0,024 | Fumarate reductase (NADH) inhibitor      | 0,291   | 0,043 |
| 0,347 | 0,047 | Pyruvate decarboxylase inhibitor         | 0,287   | 0,039 |
| 0,347 | 0,048 | Monodehydroascorbate reductase (NADH)    | 0,410   | 0,162 |
| 0,316 | 0,017 | Cell wall biosynthesis inhibitor         | 0,349   | 0,101 |
| 0,383 | 0,084 | Dimethylargininase inhibitor             | 0,252   | 0,005 |
| 0,324 | 0,026 | Lactaldehyde reductase inhibitor         | 0,295   | 0,047 |
| 0,341 | 0,044 | Fructan beta-fructosidase inhibitor      | 0,291   | 0,044 |
| 0,306 | 0,008 | HIV-2 reverse transcriptase inhibitor    | 0,314   | 0,069 |
| 0,325 | 0,028 | Interleukin antagonist                   | 0,260   | 0,016 |
| 0,311 | 0,014 | Alkene monooxygenase inhibitor           | 0,336   | 0,091 |
| 0,301 | 0,004 | Antithyroid                              | 0,303   | 0,059 |
| 0,357 | 0,061 | Cyanoalanine nitrilase inhibitor         | 0,312   | 0,070 |
| 0,366 | 0,070 | N-acetylneuraminate 7-O(or 9-O)-acetyltr | 0,358   | 0,117 |
| 0,350 | 0,054 | Chitosanase inhibitor                    | 0,262   | 0,021 |
| 0,370 | 0,074 | CYP4A11 substrate                        | 0,289   | 0,050 |
| 0,300 | 0,004 | Estrogen beta receptor agonist           | 0,380   | 0,141 |
| 0,345 | 0,051 | CYP4A substrate                          | 0,243   | 0,005 |
| 0,368 | 0,074 | Membrane permeability enhancer           | 0,241   | 0,004 |
| 0,381 | 0,087 | Apyrase inhibitor                        | 0,242   | 0,005 |
| 0,325 | 0,032 | TRPA1 agonist                            | 0,293   | 0,056 |
| 0,298 | 0,004 | HIV-1 integrase inhibitor                | 0,293   | 0,056 |
| 0,309 | 0,016 | Anthranilate 3-monooxygenase (deamina    | 0,275   | 0,038 |
| 0,371 | 0,079 | Cl--transporting ATPase inhibitor        | 0,322   | 0,086 |
| 0,413 | 0,120 | Omptin inhibitor                         | 0,282   | 0,047 |
| 0,302 | 0,010 | Thioredoxin reductase inhibitor          | 0,326   | 0,091 |
| 0,294 | 0,003 | 12-Lipoxygenase inhibitor                | 0,266   | 0,032 |
| 0,343 | 0,053 | 3-Cyanoalanine hydratase inhibitor       | 0,348   | 0,114 |
| 0,336 | 0,046 | Glycerol-3-phosphate dehydrogenase inh   | 0,252   | 0,019 |
| 0,413 | 0,124 | General pump inhibitor                   | 0,267   | 0,034 |
| 0,358 | 0,071 | Antithrombotic                           | 0,323   | 0,091 |
| 0,301 | 0,016 | Alcohol oxidase inhibitor                | 0,288   | 0,055 |
| 0,291 | 0,006 | CYP1A3 substrate                         | 0,328   | 0,096 |

|       |       |                                                        |       |       |
|-------|-------|--------------------------------------------------------|-------|-------|
| 0,311 | 0,025 | Transcription factor NF kappa A inhibitor              | 0,241 | 0,009 |
| 0,289 | 0,005 | Hypoxia inducible factor 1 alpha inhibitor             | 0,255 | 0,024 |
| 0,330 | 0,045 | H+-exporting ATPase inhibitor                          | 0,251 | 0,020 |
| 0,366 | 0,081 | Neuropeptide Y4 antagonist                             | 0,311 | 0,081 |
| 0,309 | 0,025 | Apoptosis antagonist                                   | 0,257 | 0,027 |
| 0,330 | 0,046 | Taurocyamine kinase inhibitor                          | 0,276 | 0,047 |
| 0,330 | 0,046 | Opheline kinase inhibitor                              | 0,310 | 0,082 |
| 0,379 | 0,096 | Lysine 2,3-aminomutase inhibitor                       | 0,296 | 0,068 |
| 0,296 | 0,013 | Diiodophenylpyruvate reductase inhibitor               | 0,310 | 0,082 |
| 0,337 | 0,055 | Mannose isomerase inhibitor                            | 0,287 | 0,060 |
| 0,363 | 0,081 | Polyamine-transporting ATPase inhibitor                | 0,322 | 0,095 |
| 0,356 | 0,075 | Cytochrome P450 stimulant                              | 0,242 | 0,016 |
| 0,347 | 0,066 | Chenodeoxycholytaurine hydrolase inhibitor             | 0,324 | 0,098 |
| 0,283 | 0,003 | VEGF expression inhibitor                              | 0,252 | 0,026 |
| 0,303 | 0,023 | CYP2B1 substrate                                       | 0,268 | 0,043 |
| 0,374 | 0,095 | Spasmolytic, urinary                                   | 0,254 | 0,029 |
| 0,297 | 0,018 | 3,4-Dihydroxy-9,10-secoandrosta-1,3,5(10H)-trien-2-one | 0,273 | 0,048 |
| 0,341 | 0,063 | Phosphatidylserine decarboxylase inhibitor             | 0,270 | 0,046 |
| 0,283 | 0,004 | MAO B inhibitor                                        | 0,236 | 0,011 |
| 0,318 | 0,041 | Di-trans,poly-cis-decaprenylcistransferase             | 0,348 | 0,124 |
| 0,321 | 0,043 | Tyrosine 3 hydroxylase inhibitor                       | 0,247 | 0,023 |
| 0,292 | 0,014 | Iduronate-2-sulfatase inhibitor                        | 0,290 | 0,066 |
| 0,298 | 0,021 | Alkylator                                              | 0,350 | 0,127 |
| 0,317 | 0,041 | Sorbitol-6-phosphate 2-dehydrogenase inhibitor         | 0,276 | 0,053 |
| 0,305 | 0,029 | Endopeptidase inhibitor                                | 0,288 | 0,066 |
| 0,366 | 0,091 | Fragilysin inhibitor                                   | 0,317 | 0,095 |
| 0,320 | 0,044 | Glutathione dehydrogenase (ascorbate) inhibitor        | 0,243 | 0,021 |
| 0,332 | 0,057 | Aspergillus nuclease S1 inhibitor                      | 0,302 | 0,081 |
| 0,288 | 0,013 | Isoquinoline 1-oxidoreductase inhibitor                | 0,289 | 0,068 |
| 0,430 | 0,156 | Polyporopepsin inhibitor                               | 0,308 | 0,087 |
| 0,357 | 0,083 | Sphinganine kinase inhibitor                           | 0,236 | 0,016 |
| 0,286 | 0,013 | Transcription factor NF kappa B inhibitor              | 0,297 | 0,077 |
| 0,314 | 0,041 | Antipyretic                                            | 0,254 | 0,034 |
| 0,311 | 0,038 | 2-Oxoaldehyde dehydrogenase (NADP+) inhibitor          | 0,232 | 0,012 |
| 0,377 | 0,105 | Erythropoiesis stimulant                               | 0,239 | 0,019 |
| 0,289 | 0,019 | Hippurate hydrolase inhibitor                          | 0,269 | 0,051 |
| 0,323 | 0,052 | Nucleoside oxidase (H2O2-forming) inhibitor            | 0,355 | 0,138 |
| 0,350 | 0,080 | Thymidylate 5'-phosphatase inhibitor                   | 0,332 | 0,115 |
| 0,284 | 0,014 | UGT2B18 substrate                                      | 0,245 | 0,028 |
| 0,303 | 0,033 | Antiperistaltic                                        | 0,246 | 0,030 |
| 0,294 | 0,024 | N6-methyl-lysine oxidase inhibitor                     | 0,292 | 0,076 |
| 0,323 | 0,054 | Cyclomaltodextrinase inhibitor                         | 0,252 | 0,037 |
| 0,289 | 0,019 | Interleukin agonist                                    | 0,281 | 0,066 |
| 0,310 | 0,040 | Steroid synthesis inhibitor                            | 0,225 | 0,010 |
| 0,339 | 0,070 | Muscular dystrophy treatment                           | 0,234 | 0,019 |
| 0,302 | 0,033 | Sweetener                                              | 0,260 | 0,046 |
| 0,366 | 0,097 | Fibrolase inhibitor                                    | 0,283 | 0,069 |



|       |       |                                           |       |       |
|-------|-------|-------------------------------------------|-------|-------|
| 0,344 | 0,075 | Malate oxidase inhibitor                  | 0,240 | 0,027 |
| 0,406 | 0,139 | Acute neurologic disorders treatment      | 0,316 | 0,104 |
| 0,351 | 0,084 | Immunosuppressant                         | 0,286 | 0,074 |
| 0,274 | 0,008 | Postmenopausal disorders treatment        | 0,292 | 0,080 |
| 0,311 | 0,046 | Gamma-glutamyltransferase inhibitor       | 0,286 | 0,074 |
| 0,338 | 0,075 | Antiinfective                             | 0,240 | 0,028 |
| 0,297 | 0,034 | 2,4-Dichlorophenol 6-monooxygenase in     | 0,269 | 0,058 |
| 0,342 | 0,079 | Tpr proteinase (Porphyromonas gingivalis  | 0,275 | 0,064 |
| 0,333 | 0,070 | Dolichyl-diphosphooligosaccharide-protei  | 0,285 | 0,074 |
| 0,343 | 0,080 | Antipruritic                              | 0,312 | 0,102 |
| 0,329 | 0,067 | Glutamine-phenylpyruvate transaminase     | 0,260 | 0,050 |
| 0,316 | 0,054 | Glucan 1,4-alpha-maltotetraohydrolase ir  | 0,212 | 0,002 |
| 0,283 | 0,021 | 2,5-Dihydropyridine 5,6-dioxygenase in    | 0,241 | 0,031 |
| 0,290 | 0,028 | Tauropine dehydrogenase inhibitor         | 0,225 | 0,016 |
| 0,276 | 0,015 | UGT2B1 substrate                          | 0,215 | 0,006 |
| 0,346 | 0,085 | Analeptic                                 | 0,288 | 0,081 |
| 0,328 | 0,067 | Alcohol dehydrogenase (acceptor) inhibit  | 0,252 | 0,044 |
| 0,345 | 0,085 | Amine dehydrogenase inhibitor             | 0,215 | 0,008 |
| 0,284 | 0,024 | Anthelmintic (Fasciola)                   | 0,242 | 0,035 |
| 0,352 | 0,092 | CYP3A5 substrate                          | 0,250 | 0,044 |
| 0,320 | 0,061 | Arylmalonate decarboxylase inhibitor      | 0,230 | 0,023 |
| 0,322 | 0,063 | Isopenicillin-N epimerase inhibitor       | 0,297 | 0,091 |
| 0,271 | 0,013 | Nitric oxide scavenger                    | 0,269 | 0,064 |
| 0,316 | 0,059 | Venom exonuclease inhibitor               | 0,326 | 0,121 |
| 0,317 | 0,060 | Aryl-acylamidase inhibitor                | 0,224 | 0,019 |
| 0,321 | 0,064 | Pullulanase inhibitor                     | 0,275 | 0,071 |
| 0,308 | 0,051 | Arylacetonitrilase inhibitor              | 0,241 | 0,036 |
| 0,280 | 0,024 | Cyclooxygenase substrate                  | 0,226 | 0,022 |
| 0,274 | 0,018 | Leukotriene synthesis inhibitor           | 0,261 | 0,057 |
| 0,297 | 0,042 | Horrilysin inhibitor                      | 0,280 | 0,077 |
| 0,262 | 0,007 | Protein-tyrosine phosphatase 1B inhibito  | 0,297 | 0,095 |
| 0,260 | 0,005 | UGT2B20 substrate                         | 0,217 | 0,015 |
| 0,333 | 0,079 | Methylamine-glutamate N-methyltransfe     | 0,214 | 0,012 |
| 0,389 | 0,136 | Gastrin inhibitor                         | 0,290 | 0,088 |
| 0,337 | 0,084 | Histidine N-acetyltransferase inhibitor   | 0,245 | 0,044 |
| 0,298 | 0,045 | Ferredoxin hydrogenase inhibitor          | 0,244 | 0,043 |
| 0,292 | 0,041 | GABA C receptor agonist                   | 0,229 | 0,029 |
| 0,256 | 0,005 | Estrogen alpha receptor agonist           | 0,209 | 0,009 |
| 0,315 | 0,064 | Antinephritic                             | 0,268 | 0,068 |
| 0,256 | 0,006 | Diacylglycerol kinase inhibitor           | 0,204 | 0,005 |
| 0,309 | 0,060 | Cytochrome-b5 reductase inhibitor         | 0,262 | 0,063 |
| 0,312 | 0,062 | Antiinflammatory, intestinal              | 0,208 | 0,009 |
| 0,317 | 0,068 | 4-Hydroxymandelate oxidase inhibitor      | 0,264 | 0,066 |
| 0,311 | 0,062 | Undecaprenyldiphospho-muramoylpenta       | 0,272 | 0,074 |
| 0,329 | 0,081 | (R)-Pantolactone dehydrogenase (flavin) i | 0,236 | 0,039 |
| 0,272 | 0,023 | Uric acid excretion stimulant             | 0,204 | 0,007 |
| 0,313 | 0,065 | N-acylmannosamine kinase inhibitor        | 0,297 | 0,100 |

|       |       |                                           |       |       |
|-------|-------|-------------------------------------------|-------|-------|
| 0,256 | 0,008 | CYP2B4 substrate                          | 0,204 | 0,007 |
| 0,262 | 0,014 | Antihematotoxic                           | 0,275 | 0,080 |
| 0,271 | 0,023 | 4-Phytase inhibitor                       | 0,254 | 0,059 |
| 0,271 | 0,025 | Shikimate 5-dehydrogenase inhibitor       | 0,275 | 0,080 |
| 0,280 | 0,035 | Antineoplastic (brain cancer)             | 0,217 | 0,022 |
| 0,269 | 0,024 | 3-Hydroxyphenylacetate 6-hydroxylase in   | 0,311 | 0,116 |
| 0,297 | 0,052 | Methane monooxygenase inhibitor           | 0,287 | 0,092 |
| 0,369 | 0,125 | Antidyskinetic                            | 0,238 | 0,044 |
| 0,256 | 0,012 | Cytochrome-b5 reductase substrate         | 0,259 | 0,064 |
| 0,290 | 0,046 | Aminomuconate-semialdehyde dehydrog       | 0,200 | 0,006 |
| 0,248 | 0,004 | Alpha glucosidase inhibitor               | 0,333 | 0,139 |
| 0,275 | 0,031 | Maltose-transporting ATPase inhibitor     | 0,236 | 0,042 |
| 0,265 | 0,022 | UGT2B9 substrate                          | 0,233 | 0,041 |
| 0,304 | 0,061 | ATP phosphoribosyltransferase inhibitor   | 0,310 | 0,117 |
| 0,247 | 0,005 | Heat shock protein antagonist             | 0,231 | 0,039 |
| 0,278 | 0,036 | 3-Hydroxybenzoate 4-monooxygenase inl     | 0,217 | 0,025 |
| 0,353 | 0,111 | Antihypoxic                               | 0,208 | 0,016 |
| 0,263 | 0,023 | Diphosphomevalonate decarboxylase inh     | 0,306 | 0,114 |
| 0,254 | 0,013 | Phenylacetaldehyde dehydrogenase inhi     | 0,264 | 0,072 |
| 0,335 | 0,095 | Spermidine dehydrogenase inhibitor        | 0,194 | 0,003 |
| 0,290 | 0,049 | Adrenaline release stimulant              | 0,257 | 0,066 |
| 0,301 | 0,060 | Glycolate dehydrogenase inhibitor         | 0,264 | 0,074 |
| 0,292 | 0,052 | Mepriin B inhibitor                       | 0,254 | 0,064 |
| 0,292 | 0,052 | Cyclohexyl-isocyanide hydratase inhibitor | 0,260 | 0,071 |
| 0,294 | 0,055 | Bisphosphoglycerate phosphatase inhibi    | 0,258 | 0,070 |
| 0,315 | 0,076 | ADP-thymidine kinase inhibitor            | 0,212 | 0,024 |
| 0,289 | 0,051 | Bothrolysin inhibitor                     | 0,240 | 0,052 |
| 0,257 | 0,021 | Deoxyribonuclease I inhibitor             | 0,212 | 0,024 |
| 0,247 | 0,011 | SMN2 expression enhancer                  | 0,278 | 0,091 |
| 0,252 | 0,016 | Psychosexual dysfunction treatment        | 0,280 | 0,093 |
| 0,261 | 0,025 | Neurotrophic factor enhancer              | 0,280 | 0,093 |
| 0,275 | 0,040 | Catechol oxidase inhibitor                | 0,253 | 0,066 |
| 0,308 | 0,074 | N-formylmethionyl-peptidase inhibitor     | 0,225 | 0,038 |
| 0,283 | 0,049 | Shikimate O-hydroxycinnamoyltransferas    | 0,192 | 0,006 |
| 0,275 | 0,041 | Antineoplastic (colorectal cancer)        | 0,207 | 0,022 |
| 0,244 | 0,010 | Beta lactamase inhibitor                  | 0,276 | 0,091 |
| 0,258 | 0,025 | Aldehyde dehydrogenase 2 substrate        | 0,275 | 0,090 |
| 0,292 | 0,060 | S-alkylcysteine lyase inhibitor           | 0,231 | 0,046 |
| 0,288 | 0,057 | Gluconolactonase inhibitor                | 0,248 | 0,063 |
| 0,316 | 0,085 | Adenomatous polyposis treatment           | 0,250 | 0,066 |
| 0,308 | 0,077 | Creatininase inhibitor                    | 0,280 | 0,095 |
| 0,275 | 0,045 | CYP3A4 inhibitor                          | 0,293 | 0,109 |
| 0,257 | 0,027 | Viral entry inhibitor                     | 0,243 | 0,059 |
| 0,283 | 0,054 | Uroporphyrinogen-III synthase inhibitor   | 0,196 | 0,012 |
| 0,333 | 0,104 | Antimyopathies                            | 0,230 | 0,047 |
| 0,264 | 0,036 | 2-Oxoglutarate decarboxylase inhibitor    | 0,298 | 0,116 |
| 0,258 | 0,029 | Laminaribiose phosphorylase inhibitor     | 0,294 | 0,112 |

|       |       |                                             |       |       |
|-------|-------|---------------------------------------------|-------|-------|
| 0,279 | 0,052 | Benzaldehyde dehydrogenase (NADP+) in       | 0,267 | 0,085 |
| 0,270 | 0,043 | Mannitol-1-phosphatase inhibitor            | 0,202 | 0,020 |
| 0,317 | 0,090 | Sulfite dehydrogenase inhibitor             | 0,221 | 0,039 |
| 0,257 | 0,030 | CYP4F2 substrate                            | 0,238 | 0,057 |
| 0,304 | 0,078 | Phosphatidylinositol diacylglycerol-lyase i | 0,237 | 0,056 |
| 0,265 | 0,040 | Antineoplastic (colon cancer)               | 0,297 | 0,116 |
| 0,279 | 0,055 | Histidinol-phosphatase inhibitor            | 0,243 | 0,063 |
| 0,271 | 0,047 | Crotonoyl-[acyl-carrier-protein] hydratase  | 0,231 | 0,052 |
| 0,269 | 0,046 | N-Acyl-D-aspartate deacylase inhibitor      | 0,184 | 0,004 |
| 0,339 | 0,116 | Vasodilator, peripheral                     | 0,216 | 0,037 |
| 0,257 | 0,034 | Penicillin amidase inhibitor                | 0,256 | 0,076 |
| 0,237 | 0,014 | Biphenyl-2,3-diol 1,2-dioxygenase inhibitor | 0,197 | 0,019 |
| 0,231 | 0,010 | 6-Methylsalicylate decarboxylase inhibitor  | 0,219 | 0,040 |
| 0,270 | 0,049 | 2-Hydroxy-3-oxoadipate synthase inhibitor   | 0,246 | 0,067 |
| 0,276 | 0,055 | Methanol dehydrogenase inhibitor            | 0,212 | 0,034 |
| 0,227 | 0,006 | 5-Lipoxygenase inhibitor                    | 0,221 | 0,043 |
| 0,275 | 0,056 | 2,3,4,5-Tetrahydropyridine-2,6-dicarboxy    | 0,292 | 0,114 |
| 0,300 | 0,082 | Nicotinate dehydrogenase inhibitor          | 0,220 | 0,042 |
| 0,268 | 0,050 | Antiprotozoal (Trichomonas)                 | 0,309 | 0,131 |
| 0,269 | 0,052 | N-hydroxy-2-acetamidofluorene reductas      | 0,218 | 0,040 |
| 0,254 | 0,037 | Interleukin 6 antagonist                    | 0,214 | 0,037 |
| 0,243 | 0,026 | Tumour necrosis factor antagonist           | 0,278 | 0,101 |
| 0,297 | 0,081 | Antineoplastic (multiple myeloma)           | 0,262 | 0,086 |
| 0,218 | 0,004 | L-Iditol 2-dehydrogenase inhibitor          | 0,225 | 0,050 |
| 0,229 | 0,016 | Phospholipase A2 inhibitor                  | 0,318 | 0,143 |
| 0,249 | 0,036 | Antineoplastic (melanoma)                   | 0,254 | 0,079 |
| 0,276 | 0,063 | Hyaluronic acid agonist                     | 0,178 | 0,005 |
| 0,220 | 0,007 | MAP-kinase-activated kinase inhibitor       | 0,205 | 0,032 |
| 0,296 | 0,084 | Peptide-N4-(N-acetyl-beta-glucosaminyl)     | 0,193 | 0,020 |
| 0,256 | 0,045 | Antineoplastic enhancer                     | 0,186 | 0,014 |
| 0,216 | 0,005 | 3-Dehydroquinone synthase inhibitor         | 0,205 | 0,033 |
| 0,284 | 0,074 | Antiprotozoal (Coccidial)                   | 0,260 | 0,088 |
| 0,241 | 0,031 | Glycerol-1-phosphatase inhibitor            | 0,271 | 0,100 |
| 0,217 | 0,008 | CYP19 substrate                             | 0,223 | 0,052 |
| 0,254 | 0,045 | Acyl-CoA oxidase inhibitor                  | 0,304 | 0,134 |
| 0,316 | 0,107 | Simian immunodeficiency virus proteinase    | 0,209 | 0,038 |
| 0,250 | 0,042 | Nitrate reductase inhibitor                 | 0,176 | 0,006 |
| 0,282 | 0,074 | Skeletal muscle relaxant                    | 0,189 | 0,019 |
| 0,250 | 0,042 | Guanidinoacetase inhibitor                  | 0,285 | 0,117 |
| 0,253 | 0,045 | 6-Carboxyhexanoate-CoA ligase inhibitor     | 0,180 | 0,013 |
| 0,253 | 0,045 | Homoaconitate hydratase inhibitor           | 0,236 | 0,069 |
| 0,253 | 0,045 | Biotin-CoA ligase inhibitor                 | 0,200 | 0,034 |
| 0,253 | 0,045 | Triacetate-lactonase inhibitor              | 0,177 | 0,011 |
| 0,270 | 0,063 | 5 Hydroxytryptamine 2B agonist              | 0,233 | 0,069 |
| 0,279 | 0,072 | 2-Hydroxyruconate-semialdehyde hydro        | 0,192 | 0,029 |
| 0,252 | 0,045 | Rhamnulose-1-phosphate aldolase inhibit     | 0,262 | 0,099 |
| 0,260 | 0,054 | Antiviral                                   | 0,261 | 0,099 |

|       |       |                                             |       |       |
|-------|-------|---------------------------------------------|-------|-------|
| 0,225 | 0,020 | Tumour necrosis factor alpha antagonist     | 0,268 | 0,106 |
| 0,219 | 0,013 | 2-Pyrocatechuate decarboxylase inhibitor    | 0,249 | 0,088 |
| 0,249 | 0,044 | Styrene-oxide isomerase inhibitor           | 0,297 | 0,136 |
| 0,273 | 0,068 | Endothelial growth factor antagonist        | 0,293 | 0,132 |
| 0,261 | 0,057 | Lactose synthase inhibitor                  | 0,284 | 0,123 |
| 0,283 | 0,079 | N-benzyloxycarbonylglycine hydrolase inh    | 0,201 | 0,041 |
| 0,278 | 0,074 | 2-Haloacid dehalogenase inhibitor           | 0,167 | 0,007 |
| 0,296 | 0,092 | Fucosterol-epoxide lyase inhibitor          | 0,178 | 0,018 |
| 0,218 | 0,015 | Tubulin antagonist                          | 0,250 | 0,090 |
| 0,210 | 0,007 | Glutathione reductase inhibitor             | 0,215 | 0,056 |
| 0,243 | 0,040 | Glucan 1,4-beta-glucosidase inhibitor       | 0,205 | 0,045 |
| 0,221 | 0,020 | Antineoplastic (glioma)                     | 0,232 | 0,072 |
| 0,219 | 0,017 | Topoisomerase II inhibitor                  | 0,303 | 0,144 |
| 0,229 | 0,028 | DNA directed RNA polymerase inhibitor       | 0,213 | 0,054 |
| 0,236 | 0,036 | Paraoxonase substrate                       | 0,304 | 0,145 |
| 0,300 | 0,100 | Mitochondrial processing peptidase inhib    | 0,202 | 0,044 |
| 0,251 | 0,052 | Ubiquitin thiolesterase inhibitor           | 0,205 | 0,047 |
| 0,254 | 0,054 | Pappalysin-1 inhibitor                      | 0,189 | 0,032 |
| 0,220 | 0,020 | Huntington's disease treatment              | 0,224 | 0,068 |
| 0,272 | 0,072 | Antitoxic                                   | 0,188 | 0,032 |
| 0,259 | 0,059 | Gamma-D-Glutamyl-meso-diaminopimelate       | 0,178 | 0,021 |
| 0,293 | 0,093 | Phosphoinositide 5-phosphatase inhibitor    | 0,281 | 0,125 |
| 0,288 | 0,090 | Adenylyl-sulfate reductase inhibitor        | 0,250 | 0,094 |
| 0,250 | 0,051 | UGT2B17 substrate                           | 0,162 | 0,007 |
| 0,236 | 0,037 | Cholesterol synthesis inhibitor             | 0,179 | 0,024 |
| 0,267 | 0,068 | Phospholipase C inhibitor                   | 0,202 | 0,047 |
| 0,258 | 0,060 | Dimethylmaleate hydratase inhibitor         | 0,173 | 0,018 |
| 0,223 | 0,026 | CYP2B18 substrate                           | 0,175 | 0,021 |
| 0,296 | 0,099 | Myc inhibitor                               | 0,209 | 0,055 |
| 0,282 | 0,085 | DNA-(apurinic or apyrimidinic site) lyase i | 0,180 | 0,026 |
| 0,258 | 0,062 | Levanase inhibitor                          | 0,202 | 0,049 |
| 0,345 | 0,149 | Antinociceptive                             | 0,222 | 0,069 |
| 0,237 | 0,041 | Blasticidin-S deaminase inhibitor           | 0,166 | 0,013 |
| 0,210 | 0,015 | Ca2+/calmodulin-dependent protein kina      | 0,194 | 0,041 |
| 0,238 | 0,044 | Histone acetyltransferase inhibitor         | 0,186 | 0,034 |
| 0,231 | 0,037 | Trans-pentaprenyltranstransferase inhibi    | 0,154 | 0,002 |
| 0,265 | 0,072 | Muscle relaxant                             | 0,224 | 0,073 |
| 0,207 | 0,014 | Azobenzene reductase inhibitor              | 0,206 | 0,054 |
| 0,227 | 0,034 | Endo-1,3(4)-beta-glucanase inhibitor        | 0,237 | 0,086 |
| 0,251 | 0,059 | Sclerosant                                  | 0,246 | 0,095 |
| 0,213 | 0,021 | Catalase stimulant                          | 0,253 | 0,103 |
| 0,207 | 0,015 | Coagulant                                   | 0,247 | 0,096 |
| 0,264 | 0,072 | Poly(beta-D-mannuronate) lyase inhibitor    | 0,233 | 0,082 |
| 0,216 | 0,025 | Cyclooxygenase inhibitor                    | 0,165 | 0,017 |
| 0,278 | 0,087 | Uterine relaxant                            | 0,264 | 0,115 |
| 0,270 | 0,080 | Opioid dependency treatment                 | 0,244 | 0,095 |
| 0,242 | 0,052 | Anticataract                                | 0,157 | 0,009 |

|       |       |                                            |       |       |
|-------|-------|--------------------------------------------|-------|-------|
| 0,200 | 0,010 | Antineoplastic (uterine cancer)            | 0,171 | 0,023 |
| 0,206 | 0,017 | Succinic dehydrogenase inhibitor           | 0,191 | 0,043 |
| 0,231 | 0,042 | Lombricine kinase inhibitor                | 0,194 | 0,046 |
| 0,191 | 0,002 | MAP-kinase-activated kinase 1 inhibitor    | 0,262 | 0,115 |
| 0,234 | 0,045 | Creatinine deaminase inhibitor             | 0,208 | 0,060 |
| 0,231 | 0,043 | Arylsulfatase inhibitor                    | 0,222 | 0,075 |
| 0,233 | 0,045 | Aureolysin inhibitor                       | 0,157 | 0,011 |
| 0,191 | 0,005 | Indoleamine-pyrrole 2,3-dioxygenase inhi   | 0,271 | 0,124 |
| 0,256 | 0,070 | Gestagen antagonist                        | 0,390 | 0,243 |
| 0,220 | 0,034 | Phenylalanine decarboxylase inhibitor      | 0,182 | 0,037 |
| 0,233 | 0,047 | Sedoheptulose-bisphosphatase inhibitor     | 0,229 | 0,084 |
| 0,258 | 0,072 | Aspartate-ammonia ligase inhibitor         | 0,149 | 0,004 |
| 0,202 | 0,016 | Antidiabetic (type 1)                      | 0,210 | 0,065 |
| 0,231 | 0,045 | Aryldialkylphosphatase inhibitor           | 0,252 | 0,107 |
| 0,197 | 0,012 | Vitamin                                    | 0,174 | 0,030 |
| 0,241 | 0,056 | O-aminophenol oxidase inhibitor            | 0,197 | 0,054 |
| 0,209 | 0,024 | Phospholipase inhibitor                    | 0,197 | 0,054 |
| 0,233 | 0,049 | L-glucuronate reductase inhibitor          | 0,357 | 0,214 |
| 0,196 | 0,012 | Protocatechuate 3,4-dioxygenase inhibitc   | 0,276 | 0,133 |
| 0,194 | 0,011 | Cytokine release inhibitor                 | 0,210 | 0,067 |
| 0,201 | 0,018 | Oligo-1,6-glucosidase inhibitor            | 0,222 | 0,080 |
| 0,216 | 0,033 | Antineoplastic (ovarian cancer)            | 0,228 | 0,086 |
| 0,228 | 0,045 | Ferredoxin-nitrite reductase inhibitor     | 0,226 | 0,085 |
| 0,277 | 0,095 | DNA polymerase I inhibitor                 | 0,179 | 0,037 |
| 0,236 | 0,055 | D-alanine 2-hydroxymethyltransferase inl   | 0,204 | 0,062 |
| 0,287 | 0,106 | Acetylerase inhibitor                      | 0,148 | 0,007 |
| 0,214 | 0,033 | Antineoplastic (bladder cancer)            | 0,186 | 0,046 |
| 0,190 | 0,009 | Aromatase inhibitor                        | 0,223 | 0,083 |
| 0,282 | 0,102 | CYP2D2 inhibitor                           | 0,292 | 0,152 |
| 0,250 | 0,070 | [acyl-carrier-protein] S-acetyltransferase | 0,211 | 0,071 |
| 0,221 | 0,041 | Methylaspartate ammonia-lyase inhibitor    | 0,217 | 0,077 |
| 0,225 | 0,046 | Leucine dehydrogenase inhibitor            | 0,267 | 0,127 |
| 0,239 | 0,060 | Glutarate-semialdehyde dehydrogenase i     | 0,181 | 0,041 |
| 0,187 | 0,009 | NOS3 expression enhancer                   | 0,185 | 0,046 |
| 0,183 | 0,005 | Phosphorylase kinase inhibitor             | 0,278 | 0,139 |
| 0,221 | 0,044 | Trans-2-enoyl-CoA reductase (NAD+) inhi    | 0,174 | 0,036 |
| 0,221 | 0,044 | Pyruvate dehydrogenase (cytochrome) in     | 0,163 | 0,024 |
| 0,265 | 0,089 | Antineoplastic (pancreatic cancer)         | 0,155 | 0,017 |
| 0,216 | 0,040 | Aspartate-tRNA ligase inhibitor            | 0,207 | 0,070 |
| 0,272 | 0,096 | Antiprotozoal (Amoeba)                     | 0,167 | 0,030 |
| 0,256 | 0,081 | Transketolase inhibitor                    | 0,217 | 0,081 |
| 0,191 | 0,017 | Potassium channel (Ca-activated) activatc  | 0,150 | 0,014 |
| 0,297 | 0,123 | Centromere associated protein inhibitor    | 0,205 | 0,069 |
| 0,311 | 0,137 | RNA-directed RNA polymerase inhibitor      | 0,196 | 0,062 |
| 0,196 | 0,023 | Antineoplastic (squamous cell carcinoma)   | 0,263 | 0,128 |
| 0,221 | 0,049 | CYP2D1 substrate                           | 0,209 | 0,074 |
| 0,193 | 0,022 | L-ascorbate peroxidase inhibitor           | 0,252 | 0,118 |

|       |       |                                                             |       |       |
|-------|-------|-------------------------------------------------------------|-------|-------|
| 0,221 | 0,049 | Tropinesterase inhibitor                                    | 0,153 | 0,020 |
| 0,221 | 0,049 | Snapalysin inhibitor                                        | 0,199 | 0,066 |
| 0,217 | 0,046 | UGT1A5 substrate                                            | 0,191 | 0,058 |
| 0,236 | 0,065 | Cutinase inhibitor                                          | 0,180 | 0,047 |
| 0,221 | 0,050 | Lipoprotein lipase stimulant                                | 0,168 | 0,035 |
| 0,198 | 0,028 | Homogentisate 1,2-dioxygenase inhibitor                     | 0,213 | 0,082 |
| 0,186 | 0,016 | Isocitrate dehydrogenase (NAD+) inhibitor                   | 0,230 | 0,098 |
| 0,193 | 0,023 | 4,5-Dihydroxyphthalate decarboxylase inhibitor              | 0,251 | 0,120 |
| 0,275 | 0,105 | All-trans-retinyl-palmitate hydrolase inhibitor             | 0,136 | 0,005 |
| 0,180 | 0,011 | Phosphatidylglycerol-membrane-oligosaccharide               | 0,196 | 0,065 |
| 0,182 | 0,013 | Dry eye syndrome treatment                                  | 0,313 | 0,182 |
| 0,226 | 0,057 | Polygalacturonase inhibitor                                 | 0,203 | 0,073 |
| 0,298 | 0,130 | Biotinidase inhibitor                                       | 0,225 | 0,096 |
| 0,196 | 0,027 | Beta-cyclopiasonate dehydrogenase inhibitor                 | 0,207 | 0,078 |
| 0,231 | 0,064 | Alpha-N-acetylglucosaminidase inhibitor                     | 0,252 | 0,123 |
| 0,227 | 0,059 | 15-Hydroxyprostaglandin-D dehydrogenase                     | 0,189 | 0,060 |
| 0,275 | 0,108 | Loop diuretic                                               | 0,153 | 0,024 |
| 0,210 | 0,043 | Tryptophan dimethylallyltransferase inhibitor               | 0,229 | 0,100 |
| 0,269 | 0,102 | Inotropic                                                   | 0,167 | 0,039 |
| 0,175 | 0,008 | 4-Hydroxybenzoate decarboxylase inhibitor                   | 0,152 | 0,024 |
| 0,181 | 0,014 | 4-Hydroxybenzoate-CoA ligase inhibitor                      | 0,131 | 0,003 |
| 0,221 | 0,055 | Anthranilate-CoA ligase inhibitor                           | 0,129 | 0,002 |
| 0,197 | 0,031 | Protein-glucosylgalactosylhydroxylysine glycosyltransferase | 0,230 | 0,103 |
| 0,189 | 0,024 | Radical formation agonist                                   | 0,166 | 0,039 |
| 0,187 | 0,021 | Antineoplastic antibiotic                                   | 0,146 | 0,019 |
| 0,209 | 0,043 | Peptidylamidoglycolate lyase inhibitor                      | 0,224 | 0,097 |
| 0,214 | 0,049 | 3'-Nucleotidase inhibitor                                   | 0,183 | 0,056 |
| 0,224 | 0,059 | Myeloblastin inhibitor                                      | 0,171 | 0,046 |
| 0,182 | 0,017 | 2-Nitrophenol 2-monooxygenase inhibitor                     | 0,192 | 0,067 |
| 0,171 | 0,006 | Heat shock protein 90 antagonist                            | 0,170 | 0,046 |
| 0,214 | 0,051 | Laccase inhibitor                                           | 0,134 | 0,010 |
| 0,168 | 0,004 | Dynamine GTPase inhibitor                                   | 0,190 | 0,067 |
| 0,232 | 0,068 | Pseudouridylate synthase inhibitor                          | 0,190 | 0,067 |
| 0,182 | 0,019 | 3-Oxosteroid 1-dehydrogenase inhibitor                      | 0,190 | 0,067 |
| 0,269 | 0,106 | Dermatologic                                                | 0,248 | 0,125 |
| 0,222 | 0,059 | D-threo-aldose 1-dehydrogenase inhibitor                    | 0,193 | 0,071 |
| 0,193 | 0,030 | Procollagen-lysine 5-dioxygenase inhibitor                  | 0,237 | 0,115 |
| 0,182 | 0,019 | Amyloid beta aggregation inhibitor                          | 0,171 | 0,050 |
| 0,254 | 0,091 | Prostaglandin-E2 9-reductase inhibitor                      | 0,206 | 0,086 |
| 0,187 | 0,025 | Corticosteroid antagonist                                   | 0,214 | 0,094 |
| 0,225 | 0,062 | Alkylglycerophosphoethanolamine phosphatase                 | 0,180 | 0,060 |
| 0,268 | 0,107 | Antisecretoric                                              | 0,125 | 0,005 |
| 0,256 | 0,095 | Glutamate-tRNA ligase inhibitor                             | 0,124 | 0,004 |
| 0,269 | 0,107 | 4-Hydroxyproline epimerase inhibitor                        | 0,162 | 0,042 |
| 0,216 | 0,055 | N-acetyl-gamma-glutamyl-phosphate reductase                 | 0,181 | 0,062 |
| 0,219 | 0,058 | Polyneuridine-aldehyde esterase inhibitor                   | 0,273 | 0,154 |
| 0,212 | 0,052 | Erectile dysfunction treatment                              | 0,187 | 0,068 |

|       |       |                                            |       |       |
|-------|-------|--------------------------------------------|-------|-------|
| 0,209 | 0,049 | Antineoplastic (lymphoma)                  | 0,162 | 0,044 |
| 0,172 | 0,013 | Macrophage migration inhibitory factor ir  | 0,189 | 0,071 |
| 0,206 | 0,047 | L-amino-acid oxidase inhibitor             | 0,128 | 0,010 |
| 0,284 | 0,125 | Botulin neurotoxin A light chain inhibitor | 0,143 | 0,025 |
| 0,240 | 0,082 | Coccolysin inhibitor                       | 0,146 | 0,029 |
| 0,285 | 0,127 | Cyclohexanone monooxygenase inhibitor      | 0,183 | 0,066 |
| 0,213 | 0,055 | 3-Hydroxybutyryl-CoA dehydrogenase inl     | 0,183 | 0,066 |
| 0,213 | 0,055 | 2,4-Diaminopentanoate dehydrogenase ii     | 0,194 | 0,077 |
| 0,213 | 0,055 | Lysine 6-dehydrogenase inhibitor           | 0,189 | 0,073 |
| 0,177 | 0,020 | Cyclooxygenase 2 inhibitor                 | 0,189 | 0,073 |
| 0,184 | 0,026 | Adrenergic, ophthalmic                     | 0,189 | 0,073 |
| 0,325 | 0,168 | Heat shock protein 27 antagonist           | 0,189 | 0,073 |
| 0,250 | 0,093 | Aldehyde dehydrogenase (pyrroloquinolin    | 0,266 | 0,150 |
| 0,164 | 0,008 | CYP2A5 inhibitor                           | 0,174 | 0,059 |
| 0,242 | 0,085 | Arylesterase inhibitor                     | 0,127 | 0,012 |
| 0,246 | 0,090 | Thiamine pyridinylase inhibitor            | 0,224 | 0,109 |
| 0,207 | 0,051 | Lipoxygenase substrate                     | 0,150 | 0,035 |
| 0,205 | 0,050 | D-xylulose reductase inhibitor             | 0,145 | 0,031 |
| 0,193 | 0,038 | L-iduronidase inhibitor                    | 0,284 | 0,169 |
| 0,193 | 0,038 | Pantoate 4-dehydrogenase inhibitor         | 0,205 | 0,091 |
| 0,188 | 0,033 | Antineoplastic (carcinoma)                 | 0,142 | 0,028 |
| 0,162 | 0,008 | Squalene epoxidase inhibitor               | 0,124 | 0,010 |
| 0,215 | 0,061 | ATPase inhibitor                           | 0,125 | 0,012 |
| 0,161 | 0,007 | Quinate 5-dehydrogenase inhibitor          | 0,133 | 0,020 |
| 0,218 | 0,064 | Glycine dehydrogenase (decarboxylating)    | 0,212 | 0,099 |
| 0,204 | 0,051 | tRNA nucleotidyltransferase inhibitor      | 0,167 | 0,054 |
| 0,201 | 0,048 | Cerebroside-sulfatase inhibitor            | 0,190 | 0,078 |
| 0,172 | 0,019 | Protein kinase C inhibitor                 | 0,208 | 0,096 |
| 0,212 | 0,059 | Thrombolytic                               | 0,136 | 0,024 |
| 0,225 | 0,072 | Hydroxylamine reductase inhibitor          | 0,167 | 0,055 |
| 0,228 | 0,076 | Thiopurine S-methyltransferase inhibitor   | 0,155 | 0,045 |
| 0,279 | 0,126 | Cyclic AMP phosphodiesterase inhibitor     | 0,154 | 0,043 |
| 0,201 | 0,049 | Benzoate 4-monooxygenase inhibitor         | 0,134 | 0,024 |
| 0,165 | 0,013 | CDC25A inhibitor                           | 0,128 | 0,018 |
| 0,185 | 0,033 | Cysteine-S-conjugate beta-lyase inhibitor  | 0,191 | 0,081 |
| 0,194 | 0,042 | 3-Oxadipate enol-lactonase inhibitor       | 0,115 | 0,005 |
| 0,207 | 0,056 | Licheninase inhibitor                      | 0,175 | 0,066 |
| 0,183 | 0,032 | Riboflavin phosphotransferase inhibitor    | 0,240 | 0,131 |
| 0,254 | 0,103 | Urethanase inhibitor                       | 0,236 | 0,127 |
| 0,281 | 0,132 | Endopeptidase So inhibitor                 | 0,180 | 0,071 |
| 0,247 | 0,099 | IgA-specific serine endopeptidase inhibiti | 0,201 | 0,093 |
| 0,190 | 0,043 | Tryptophan alpha,beta-oxidase inhibitor    | 0,140 | 0,032 |
| 0,223 | 0,076 | Indolepyruvate C-methyltransferase inhi    | 0,117 | 0,010 |
| 0,185 | 0,039 | Glucan 1,6-alpha-glucosidase inhibitor     | 0,195 | 0,087 |
| 0,256 | 0,110 | Pyroglutamyl-peptidase II inhibitor        | 0,177 | 0,070 |
| 0,200 | 0,055 | Alpha-glucuronidase inhibitor              | 0,173 | 0,066 |
| 0,219 | 0,074 | Xylan endo-1,3-beta-xylosidase inhibitor   | 0,127 | 0,020 |

|       |       |                                                          |       |       |
|-------|-------|----------------------------------------------------------|-------|-------|
| 0,270 | 0,125 | CYP2A8 substrate                                         | 0,165 | 0,058 |
| 0,247 | 0,102 | Albendazole monooxygenase inhibitor                      | 0,179 | 0,073 |
| 0,154 | 0,010 | Interleukin 12 agonist                                   | 0,113 | 0,006 |
| 0,192 | 0,048 | (R,R)-butanediol dehydrogenase inhibitor                 | 0,113 | 0,006 |
| 0,188 | 0,045 | Acylphosphatase inhibitor                                | 0,113 | 0,006 |
| 0,203 | 0,060 | 4-Chlorophenylacetate 3,4-dioxygenase inhibitor          | 0,113 | 0,006 |
| 0,188 | 0,046 | Phosphoenolpyruvate-protein phosphotransferase inhibitor | 0,113 | 0,006 |
| 0,150 | 0,007 | Protein kinase C zeta inhibitor                          | 0,172 | 0,066 |
| 0,238 | 0,095 | 3C-like protease (Human coronavirus) inhibitor           | 0,177 | 0,071 |
| 0,203 | 0,060 | Bisphosphoglycerate mutase inhibitor                     | 0,165 | 0,059 |
| 0,215 | 0,072 | Aromatic-hydroxylamine O-acetyltransferase inhibitor     | 0,119 | 0,014 |
| 0,172 | 0,030 | (R)-limonene 6-monooxygenase inhibitor                   | 0,115 | 0,010 |
| 0,279 | 0,137 | HMGCS2 expression enhancer                               | 0,115 | 0,010 |
| 0,229 | 0,088 | Thiol oxidase inhibitor                                  | 0,167 | 0,061 |
| 0,196 | 0,055 | NAD+ synthase (glutamine-hydrolysing) inhibitor          | 0,199 | 0,094 |
| 0,145 | 0,004 | Stipitatonate decarboxylase inhibitor                    | 0,167 | 0,061 |
| 0,268 | 0,127 | Bilirubin oxidase inhibitor                              | 0,166 | 0,061 |
| 0,239 | 0,099 | Acidifying agent non gastric                             | 0,153 | 0,049 |
| 0,234 | 0,094 | Thiamine-triphosphatase inhibitor                        | 0,129 | 0,025 |
| 0,204 | 0,064 | Acetylorithine deacetylase inhibitor                     | 0,185 | 0,081 |
| 0,196 | 0,056 | Antirickettsial                                          | 0,171 | 0,067 |
| 0,176 | 0,037 | Xylose isomerase inhibitor                               | 0,176 | 0,073 |
| 0,165 | 0,025 | Renilla-luciferin 2-monooxygenase inhibitor              | 0,200 | 0,097 |
| 0,194 | 0,055 | Farnesyltranstransferase inhibitor                       | 0,243 | 0,141 |
| 0,198 | 0,059 | Acaricide                                                | 0,162 | 0,061 |
| 0,225 | 0,086 | L-threonine 3-dehydrogenase inhibitor                    | 0,213 | 0,112 |
| 0,172 | 0,034 | Serum-glucocorticoid regulated kinase inhibitor          | 0,290 | 0,190 |
| 0,189 | 0,051 | 3-Carboxyethylcatechol 2,3-dioxygenase inhibitor         | 0,107 | 0,006 |
| 0,217 | 0,079 | Antipruritic, non-allergic                               | 0,158 | 0,058 |
| 0,207 | 0,069 | Peptidyl-dipeptidase B inhibitor                         | 0,114 | 0,014 |
| 0,216 | 0,079 | N-acetyllactosamine synthase inhibitor                   | 0,228 | 0,129 |
| 0,166 | 0,029 | Acetoacetate decarboxylase inhibitor                     | 0,250 | 0,152 |
| 0,175 | 0,038 | Estradiol 17alpha-dehydrogenase inhibitor                | 0,222 | 0,124 |
| 0,186 | 0,049 | Oxalate oxidase inhibitor                                | 0,196 | 0,098 |
| 0,199 | 0,062 | UGT2B10 substrate                                        | 0,154 | 0,056 |
| 0,186 | 0,049 | 3-Aminobutyryl-CoA ammonia-lyase inhibitor               | 0,192 | 0,095 |
| 0,159 | 0,023 | HIV-1 integrase (Overall Integration) inhibitor          | 0,134 | 0,037 |
| 0,192 | 0,056 | Undecaprenyl-diphosphatase inhibitor                     | 0,148 | 0,050 |
| 0,153 | 0,018 | Tyrosine 2,3-aminomutase inhibitor                       | 0,172 | 0,075 |
| 0,273 | 0,138 | Cancer associated disorders treatment                    | 0,110 | 0,013 |
| 0,222 | 0,087 | Acetylserotonin O-methyltransferase inhibitor            | 0,258 | 0,161 |
| 0,187 | 0,052 | Pyridoxine 4-oxidase inhibitor                           | 0,195 | 0,099 |
| 0,149 | 0,015 | 4-Hydroxybenzoate 3-monooxygenase inhibitor              | 0,144 | 0,048 |
| 0,210 | 0,076 | Ornithine cyclodeaminase inhibitor                       | 0,138 | 0,042 |
| 0,185 | 0,051 | Glutamin-(asparagin-)ase inhibitor                       | 0,140 | 0,044 |
| 0,159 | 0,025 | Orotate reductase (NADPH) inhibitor                      | 0,132 | 0,036 |
| 0,150 | 0,016 | Bacterial efflux pump inhibitor                          | 0,179 | 0,084 |



|       |       |                                            |       |       |
|-------|-------|--------------------------------------------|-------|-------|
| 0,137 | 0,003 | CD45 antagonist                            | 0,137 | 0,042 |
| 0,195 | 0,062 | 6-Pyruvoyltetrahydropterin synthase inhi   | 0,104 | 0,010 |
| 0,245 | 0,112 | D-lactaldehyde dehydrogenase inhibitor     | 0,104 | 0,010 |
| 0,202 | 0,069 | Camphor 1,2-monooxygenase inhibitor        | 0,117 | 0,023 |
| 0,192 | 0,059 | N-methyl-2-oxoglutaramate hydrolase inl    | 0,099 | 0,005 |
| 0,180 | 0,047 | N-acetylneuraminate synthase inhibitor     | 0,227 | 0,133 |
| 0,173 | 0,041 | Galacturan 1,4-alpha-galacturonidase inh   | 0,141 | 0,048 |
| 0,140 | 0,008 | Glycogen synthase kinase-3 alpha inhibitc  | 0,186 | 0,093 |
| 0,215 | 0,084 | Polyribonucleotide nucleotidyltransferasε  | 0,187 | 0,095 |
| 0,195 | 0,064 | 4-Hydroxyglutamate transaminase inhibit    | 0,168 | 0,075 |
| 0,217 | 0,087 | Dopamine release stimulant                 | 0,173 | 0,080 |
| 0,178 | 0,049 | Glutamate (mGluR5) agonist                 | 0,180 | 0,087 |
| 0,201 | 0,071 | Indoleacetaldoxime dehydratase inhibitor   | 0,171 | 0,078 |
| 0,269 | 0,139 | Vanilloid 1 agonist                        | 0,150 | 0,058 |
| 0,211 | 0,081 | Oryzin inhibitor                           | 0,268 | 0,176 |
| 0,138 | 0,009 | Protein kinase C eta inhibitor             | 0,118 | 0,026 |
| 0,149 | 0,020 | Vanillyl-alcohol oxidase inhibitor         | 0,148 | 0,057 |
| 0,179 | 0,050 | Acetylenecarboxylate hydratase inhibitor   | 0,217 | 0,126 |
| 0,219 | 0,091 | Prolyl aminopeptidase inhibitor            | 0,218 | 0,127 |
| 0,137 | 0,009 | Phosphatidylinositol kinase inhibitor      | 0,095 | 0,005 |
| 0,162 | 0,035 | 2-Amino adipate transaminase inhibitor     | 0,138 | 0,048 |
| 0,241 | 0,114 | Thiosulfate dehydrogenase inhibitor        | 0,144 | 0,054 |
| 0,157 | 0,031 | CYP3A5 inducer                             | 0,118 | 0,028 |
| 0,277 | 0,151 | Na+-transporting two-sector ATPase inhi    | 0,167 | 0,077 |
| 0,135 | 0,008 | CDC25 phosphatase inhibitor                | 0,120 | 0,031 |
| 0,201 | 0,074 | Phosphatidylglycerophosphatase inhibito    | 0,183 | 0,094 |
| 0,199 | 0,074 | N-acetyllactosaminide beta-1,3-N-acetyl    | 0,144 | 0,055 |
| 0,160 | 0,034 | CYP26A substrate                           | 0,129 | 0,041 |
| 0,130 | 0,004 | Phosphatidylinositol 3-kinase alpha inhibi | 0,233 | 0,145 |
| 0,217 | 0,093 | Oxytocic                                   | 0,146 | 0,058 |
| 0,204 | 0,080 | Alpha-1,6-mannosyl-glycoprotein 4-beta-    | 0,166 | 0,079 |
| 0,178 | 0,055 | Contraceptive female                       | 0,096 | 0,008 |
| 0,163 | 0,040 | Aspartyl aminopeptidase inhibitor          | 0,097 | 0,010 |
| 0,179 | 0,057 | Benzoylformate decarboxylase inhibitor     | 0,202 | 0,116 |
| 0,131 | 0,009 | Phosphatidylinositol 3-kinase inhibitor    | 0,095 | 0,008 |
| 0,142 | 0,020 | Dopachrome isomerase inhibitor             | 0,140 | 0,054 |
| 0,126 | 0,004 | Aldehyde dehydrogenase 1A2 inhibitor       | 0,143 | 0,057 |
| 0,169 | 0,047 | 3-Ketoalidoxylamine C-N-lyase inhibitor    | 0,143 | 0,057 |
| 0,202 | 0,080 | Cellulose 1,4-beta-cellobiosidase inhibito | 0,155 | 0,069 |
| 0,136 | 0,014 | T cell inhibitor                           | 0,221 | 0,135 |
| 0,160 | 0,038 | Pyridoxine 5-dehydrogenase inhibitor       | 0,192 | 0,107 |
| 0,177 | 0,056 | Quisqualate antagonist                     | 0,151 | 0,066 |
| 0,190 | 0,069 | Arachidonic acid antagonist                | 0,153 | 0,068 |
| 0,177 | 0,056 | Magnesium-protoporphyrin IX methyltra      | 0,155 | 0,071 |
| 0,160 | 0,040 | Endo-1,4-beta-xylanase inhibitor           | 0,141 | 0,056 |
| 0,175 | 0,055 | Ligase inhibitor                           | 0,175 | 0,091 |
| 0,188 | 0,068 | Inorganic diphosphatase inhibitor          | 0,191 | 0,107 |

|       |       |                                           |       |       |
|-------|-------|-------------------------------------------|-------|-------|
| 0,222 | 0,102 | DNA-3-methyladenine glycosylase I inhibi  | 0,183 | 0,100 |
| 0,153 | 0,034 | Fructose-2,6-bisphosphate 6-phosphatas    | 0,146 | 0,062 |
| 0,150 | 0,030 | Glycerol dehydratase inhibitor            | 0,097 | 0,013 |
| 0,179 | 0,060 | Antineoplastic (renal cancer)             | 0,093 | 0,010 |
| 0,159 | 0,040 | HCV NS3-helicase inhibitor                | 0,184 | 0,101 |
| 0,142 | 0,023 | Antibiotic Anthracycline-like             | 0,139 | 0,057 |
| 0,163 | 0,045 | Contraceptive                             | 0,145 | 0,064 |
| 0,121 | 0,003 | Neuraminidase inhibitor                   | 0,139 | 0,058 |
| 0,159 | 0,041 | Prolactin inhibitor                       | 0,251 | 0,170 |
| 0,182 | 0,064 | 1,4-Alpha-glucan branching enzyme inhib   | 0,251 | 0,170 |
| 0,149 | 0,032 | Narcotic antagonist                       | 0,164 | 0,083 |
| 0,186 | 0,069 | CDP-4-dehydro-6-deoxyglucose reductas     | 0,144 | 0,063 |
| 0,139 | 0,021 | Interleukin 10 antagonist                 | 0,192 | 0,111 |
| 0,154 | 0,037 | Urolithiasis treatment                    | 0,165 | 0,085 |
| 0,165 | 0,048 | Allantoinase inhibitor                    | 0,146 | 0,066 |
| 0,212 | 0,095 | Dactylysin inhibitor                      | 0,138 | 0,058 |
| 0,125 | 0,008 | Hot flush treatment                       | 0,134 | 0,055 |
| 0,138 | 0,021 | Gynecological disorders treatment         | 0,124 | 0,044 |
| 0,161 | 0,044 | Pyruvate dehydrogenase (lipoamide) inhi   | 0,166 | 0,086 |
| 0,151 | 0,035 | D-arabinonolactone oxidase inhibitor      | 0,119 | 0,040 |
| 0,144 | 0,028 | Histone deacetylase SIRT2 inhibitor       | 0,161 | 0,082 |
| 0,168 | 0,051 | N-carbamoyl-L-amino-acid hydrolase inhi   | 0,093 | 0,013 |
| 0,161 | 0,045 | Acyl-lysine deacylase inhibitor           | 0,128 | 0,049 |
| 0,182 | 0,066 | Gamma-butyrobetaine dioxygenase inhib     | 0,102 | 0,024 |
| 0,191 | 0,076 | Cyclopentanone monooxygenase inhibito     | 0,095 | 0,016 |
| 0,147 | 0,032 | Glycerophosphocholine cholinephosphod     | 0,169 | 0,090 |
| 0,210 | 0,095 | Yeast ribonuclease inhibitor              | 0,122 | 0,043 |
| 0,162 | 0,048 | CDP-diacylglycerol-inositol 3-phosphatidy | 0,139 | 0,060 |
| 0,183 | 0,069 | Glycine C-acetyltransferase inhibitor     | 0,177 | 0,098 |
| 0,213 | 0,098 | Ethanolamine-phosphate cytidyltransfe     | 0,257 | 0,178 |
| 0,144 | 0,030 | Homocysteine desulfhydrase inhibitor      | 0,228 | 0,150 |
| 0,118 | 0,004 | PRL phosphatase inhibitor                 | 0,194 | 0,117 |
| 0,159 | 0,045 | Asparagine-tRNA ligase inhibitor          | 0,135 | 0,058 |
| 0,217 | 0,103 | Taurine-2-oxoglutarate transaminase inhi  | 0,159 | 0,082 |
| 0,160 | 0,047 | Alpha-pinene-oxide decyclase inhibitor    | 0,099 | 0,023 |
| 0,237 | 0,124 | Cystic fibrosis treatment                 | 0,196 | 0,120 |
| 0,159 | 0,046 | Prepilin peptidase inhibitor              | 0,199 | 0,123 |
| 0,159 | 0,046 | Haloacetate dehalogenase inhibitor        | 0,149 | 0,073 |
| 0,242 | 0,129 | FMO3 substrate                            | 0,151 | 0,075 |
| 0,120 | 0,007 | Estrogen-related receptor alpha antagoni  | 0,200 | 0,124 |
| 0,164 | 0,051 | Antiviral (HIV)                           | 0,206 | 0,130 |
| 0,117 | 0,004 | CYP11B1 inhibitor                         | 0,208 | 0,132 |
| 0,150 | 0,038 | Poly(3-hydroxybutyrate) depolymerase in   | 0,108 | 0,033 |
| 0,164 | 0,052 | Allantoate deiminase inhibitor            | 0,196 | 0,121 |
| 0,244 | 0,132 | Hypolipemic                               | 0,100 | 0,025 |
| 0,179 | 0,067 | Subtilisin inhibitor                      | 0,144 | 0,069 |
| 0,116 | 0,005 | 3-Phosphoshikimate 1-carboxyvinyltransf   | 0,130 | 0,055 |

|       |       |                                           |       |       |
|-------|-------|-------------------------------------------|-------|-------|
| 0,166 | 0,055 | Mannan endo-1,6-alpha-mannosidase inh     | 0,159 | 0,084 |
| 0,126 | 0,014 | Sphingosine kinase inhibitor              | 0,129 | 0,055 |
| 0,165 | 0,054 | Insecticide                               | 0,151 | 0,076 |
| 0,232 | 0,121 | Methylumbelliferyl-acetate deacetylase in | 0,165 | 0,092 |
| 0,216 | 0,106 | Dipeptidase E inhibitor                   | 0,182 | 0,109 |
| 0,178 | 0,068 | Tryptophanamidase inhibitor               | 0,234 | 0,161 |
| 0,178 | 0,068 | Sphinganine-1-phosphate aldolase inhibi   | 0,087 | 0,015 |
| 0,119 | 0,009 | UGT2B7Y substrate                         | 0,142 | 0,070 |
| 0,119 | 0,009 | UGT2B7H substrate                         | 0,096 | 0,024 |
| 0,184 | 0,074 | Dynein ATPase inhibitor                   | 0,320 | 0,249 |
| 0,165 | 0,056 | Aryl sulfotransferase inhibitor           | 0,264 | 0,193 |
| 0,172 | 0,063 | Inulinase inhibitor                       | 0,153 | 0,081 |
| 0,200 | 0,092 | Opine dehydrogenase inhibitor             | 0,195 | 0,124 |
| 0,196 | 0,088 | Polarisation inhibitor                    | 0,136 | 0,065 |
| 0,175 | 0,067 | GST M1-1 substrate                        | 0,137 | 0,066 |
| 0,203 | 0,095 | Urease inhibitor                          | 0,108 | 0,038 |
| 0,157 | 0,049 | Acetolactate decarboxylase inhibitor      | 0,150 | 0,079 |
| 0,200 | 0,093 | Carnitinamidase inhibitor                 | 0,127 | 0,056 |
| 0,146 | 0,039 | Phosphoglycerate mutase inhibitor         | 0,127 | 0,056 |
| 0,156 | 0,049 | Glucan endo-1,3-alpha-glucosidase inhibi  | 0,134 | 0,064 |
| 0,114 | 0,007 | Tannase inhibitor                         | 0,151 | 0,081 |
| 0,140 | 0,034 | UGT2B11 substrate                         | 0,300 | 0,230 |
| 0,182 | 0,076 | Male reproductive dysfunction treatment   | 0,159 | 0,090 |
| 0,115 | 0,009 | Orcinol 2-monooxygenase inhibitor         | 0,132 | 0,062 |
| 0,188 | 0,082 | Gallate decarboxylase inhibitor           | 0,112 | 0,043 |
| 0,174 | 0,069 | N-acetylneuraminate 4-O-acetyltransfera   | 0,084 | 0,015 |
| 0,198 | 0,093 | Mandelate 4-monooxygenase inhibitor       | 0,154 | 0,086 |
| 0,167 | 0,062 | Gly-X carboxypeptidase inhibitor          | 0,094 | 0,026 |
| 0,156 | 0,051 | N-(5-amino-5-carboxypentanoyl)-L-cystei   | 0,135 | 0,067 |
| 0,158 | 0,054 | Ferredoxin-NADP+ reductase inhibitor      | 0,117 | 0,048 |
| 0,168 | 0,063 | Bile-salt sulfotransferase inhibitor      | 0,129 | 0,061 |
| 0,150 | 0,046 | Carboxymethylenebutenolidase inhibitor    | 0,146 | 0,079 |
| 0,149 | 0,045 | Histone deacetylase class III inhibitor   | 0,119 | 0,052 |
| 0,117 | 0,013 | Heat shock protein 70 antagonist          | 0,073 | 0,006 |
| 0,163 | 0,059 | Inositol oxygenase inhibitor              | 0,177 | 0,110 |
| 0,155 | 0,052 | Pyruvate dehydrogenase inhibitor          | 0,165 | 0,098 |
| 0,202 | 0,099 | Imidazoline receptor agonist              | 0,167 | 0,100 |
| 0,157 | 0,054 | Aminocarboxymuconate-semialdehyde d       | 0,124 | 0,057 |
| 0,136 | 0,033 | Imidazoleacetate 4-monooxygenase inhi     | 0,088 | 0,021 |
| 0,137 | 0,033 | Tyrosine-ester sulfotransferase inhibitor | 0,183 | 0,117 |
| 0,137 | 0,034 | Succinate dehydrogenase inhibitor         | 0,142 | 0,077 |
| 0,162 | 0,059 | Galactokinase inhibitor                   | 0,095 | 0,029 |
| 0,246 | 0,143 | Antiviral (Adenovirus)                    | 0,112 | 0,046 |
| 0,163 | 0,061 | Adenylate cyclase stimulant               | 0,143 | 0,078 |
| 0,144 | 0,041 | 3-Hydroxyacyl-CoA dehydrogenase inhibi    | 0,129 | 0,063 |
| 0,137 | 0,035 | Glutamate decarboxylase inhibitor         | 0,188 | 0,122 |
| 0,156 | 0,054 | Glucuronolactone reductase inhibitor      | 0,134 | 0,069 |

|       |       |                                          |       |       |
|-------|-------|------------------------------------------|-------|-------|
| 0,122 | 0,021 | Antidote, heavy metal                    | 0,123 | 0,059 |
| 0,142 | 0,041 | Guanidinodeoxy-scylo-inositol-4-phosph   | 0,165 | 0,100 |
| 0,171 | 0,071 | Catalase inhibitor                       | 0,116 | 0,051 |
| 0,137 | 0,037 | Sorbose dehydrogenase inhibitor          | 0,113 | 0,049 |
| 0,146 | 0,046 | Glucarate dehydratase inhibitor          | 0,112 | 0,048 |
| 0,112 | 0,013 | Diiodotyrosine transaminase inhibitor    | 0,085 | 0,021 |
| 0,181 | 0,082 | CYP4A2 substrate                         | 0,157 | 0,093 |
| 0,168 | 0,069 | Phenylacetate-CoA ligase inhibitor       | 0,177 | 0,113 |
| 0,198 | 0,100 | Thiol protease inhibitor                 | 0,108 | 0,045 |
| 0,157 | 0,059 | Nuclease inhibitor                       | 0,080 | 0,017 |
| 0,113 | 0,015 | NMDA receptor glycine site B antagonist  | 0,090 | 0,028 |
| 0,180 | 0,083 | (S)-3-amino-2-methylpropionate transam   | 0,079 | 0,017 |
| 0,171 | 0,074 | Isopenicillin-N synthase inhibitor       | 0,104 | 0,042 |
| 0,154 | 0,057 | Alpha-N-arabinofuranosidase inhibitor    | 0,104 | 0,042 |
| 0,114 | 0,018 | 3,4-Dihydroxyphenylacetate 2,3-dioxyger  | 0,155 | 0,093 |
| 0,115 | 0,019 | 3(or 17)alpha-hydroxysteroid dehydroger  | 0,095 | 0,033 |
| 0,112 | 0,016 | Hydroxyquinol 1,2-dioxygenase inhibitor  | 0,215 | 0,154 |
| 0,153 | 0,057 | Diisopropyl-fluorophosphatase inhibitor  | 0,175 | 0,114 |
| 0,150 | 0,054 | Allophanate hydrolase inhibitor          | 0,173 | 0,112 |
| 0,132 | 0,036 | Anabolic                                 | 0,083 | 0,022 |
| 0,166 | 0,071 | Plasmanyethanolamine desaturase inhibi   | 0,170 | 0,108 |
| 0,107 | 0,012 | SULT1A2 substrate                        | 0,111 | 0,050 |
| 0,154 | 0,059 | Cellulase inhibitor                      | 0,129 | 0,068 |
| 0,165 | 0,071 | IgA-specific metalloendopeptidase inhibi | 0,161 | 0,100 |
| 0,126 | 0,033 | Glycoprotein-fucosylgalactoside alpha-N- | 0,148 | 0,087 |
| 0,099 | 0,005 | CDC25B inhibitor                         | 0,125 | 0,065 |
| 0,143 | 0,049 | D-2-hydroxy-acid dehydrogenase inhibito  | 0,228 | 0,168 |
| 0,156 | 0,063 | Hexokinase inhibitor                     | 0,189 | 0,129 |
| 0,109 | 0,016 | 4-Hydroxybenzoate 1-hydroxylase inhibiti | 0,097 | 0,037 |
| 0,145 | 0,052 | Antibiotic                               | 0,120 | 0,060 |
| 0,145 | 0,052 | 2-Oxoisovalerate dehydrogenase (acylatir | 0,209 | 0,150 |
| 0,144 | 0,051 | Prephenate dehydrogenase inhibitor       | 0,081 | 0,022 |
| 0,158 | 0,065 | Protein synthesis stimulant              | 0,136 | 0,077 |
| 0,132 | 0,040 | Agaritine gamma-glutamyltransferase inh  | 0,148 | 0,089 |
| 0,155 | 0,062 | Galactose oxidase inhibitor              | 0,138 | 0,079 |
| 0,136 | 0,044 | Fibrosis treatment                       | 0,075 | 0,016 |
| 0,129 | 0,037 | NMDA receptor polyamine site antagonis   | 0,176 | 0,117 |
| 0,112 | 0,020 | Protein kinase C beta inhibitor          | 0,089 | 0,031 |
| 0,256 | 0,165 | Leukopoiesis inhibitor                   | 0,105 | 0,047 |
| 0,110 | 0,018 | Aldose 1-epimerase inhibitor             | 0,102 | 0,044 |
| 0,100 | 0,009 | UGT2B30 substrate                        | 0,165 | 0,108 |
| 0,100 | 0,009 | UGT2B23 substrate                        | 0,091 | 0,034 |
| 0,100 | 0,009 | UGT2B19 substrate                        | 0,214 | 0,157 |
| 0,100 | 0,009 | UGT2B4D substrate                        | 0,106 | 0,050 |
| 0,100 | 0,009 | UGT2B4E substrate                        | 0,122 | 0,066 |
| 0,216 | 0,125 | DNA synthesis inhibitor                  | 0,207 | 0,150 |
| 0,168 | 0,077 | Alkylglycerone-phosphate synthase inhibi | 0,113 | 0,056 |

|       |       |                                            |       |       |
|-------|-------|--------------------------------------------|-------|-------|
| 0,143 | 0,052 | (S)-2-hydroxy-acid oxidase inhibitor       | 0,151 | 0,095 |
| 0,138 | 0,047 | Choloylglycine hydrolase inhibitor         | 0,105 | 0,049 |
| 0,182 | 0,091 | Ribonucleoside triphosphate reductase in   | 0,155 | 0,100 |
| 0,111 | 0,021 | Phosphogluconate dehydrogenase (decar      | 0,075 | 0,020 |
| 0,127 | 0,037 | Polynucleotide adenylyltransferase inhibi  | 0,192 | 0,136 |
| 0,144 | 0,054 | D-lactate dehydrogenase inhibitor          | 0,152 | 0,097 |
| 0,154 | 0,064 | Cyclamate sulfohydrolase inhibitor         | 0,148 | 0,093 |
| 0,125 | 0,035 | Transthyretin amyloid fibril formation inh | 0,081 | 0,026 |
| 0,182 | 0,092 | Expectorant                                | 0,068 | 0,013 |
| 0,178 | 0,089 | Phenylalanine(histidine) transaminase inl  | 0,126 | 0,071 |
| 0,131 | 0,042 | DNA-3-methyladenine glycosylase II inhib   | 0,126 | 0,071 |
| 0,168 | 0,079 | Poly(alpha-L-guluronate) lyase inhibitor   | 0,213 | 0,159 |
| 0,244 | 0,155 | Lipoprotein lipase inhibitor               | 0,101 | 0,047 |
| 0,153 | 0,064 | FMN reductase inhibitor                    | 0,147 | 0,094 |
| 0,117 | 0,029 | Cyclin-dependent kinase 1 inhibitor        | 0,140 | 0,087 |
| 0,131 | 0,042 | 4-Alpha-glucanotransferase inhibitor       | 0,072 | 0,020 |
| 0,212 | 0,124 | Flavin-containing monooxygenase substr     | 0,158 | 0,106 |
| 0,129 | 0,041 | Malonate-semialdehyde dehydrogenase i      | 0,120 | 0,068 |
| 0,119 | 0,030 | CYP4F substrate                            | 0,125 | 0,073 |
| 0,138 | 0,050 | L-lysine 6-transaminase inhibitor          | 0,081 | 0,030 |
| 0,263 | 0,175 | G-protein-coupled receptor kinase inhibit  | 0,125 | 0,074 |
| 0,263 | 0,175 | Beta-adrenergic receptor kinase inhibitor  | 0,130 | 0,078 |
| 0,177 | 0,088 | GABA B receptor agonist                    | 0,088 | 0,037 |
| 0,253 | 0,165 | Transcription factor stimulant             | 0,230 | 0,179 |
| 0,253 | 0,165 | Transcription factor NF kappa B stimulant  | 0,146 | 0,095 |
| 0,101 | 0,013 | Beta tubulin antagonist                    | 0,134 | 0,084 |
| 0,179 | 0,091 | Rhizopuspepsin inhibitor                   | 0,211 | 0,161 |
| 0,117 | 0,029 | Galactosylceramide sulfotransferase inhi   | 0,099 | 0,049 |
| 0,179 | 0,091 | Antineoplastic (glioblastoma multiforme)   | 0,116 | 0,066 |
| 0,162 | 0,074 | Acetate kinase inhibitor                   | 0,116 | 0,067 |
| 0,164 | 0,077 | Lactate 2-monooxygenase inhibitor          | 0,055 | 0,005 |
| 0,153 | 0,066 | Antitussive, narcotic                      | 0,109 | 0,060 |
| 0,173 | 0,087 | Metallocoxy-peptidase D inhibitor          | 0,144 | 0,095 |
| 0,098 | 0,012 | Alpha 3 adrenoreceptor agonist             | 0,080 | 0,031 |
| 0,106 | 0,021 | Opioid mu 2 receptor antagonist            | 0,116 | 0,067 |
| 0,184 | 0,099 | Alanine-tRNA ligase inhibitor              | 0,144 | 0,095 |
| 0,196 | 0,110 | Glycine amidinotransferase inhibitor       | 0,085 | 0,036 |
| 0,207 | 0,122 | DELTA14-sterol reductase inhibitor         | 0,060 | 0,011 |
| 0,139 | 0,054 | Deoxyribose-phosphate aldolase inhibitor   | 0,055 | 0,007 |
| 0,224 | 0,139 | Pro-opiomelanocortin converting enzyme     | 0,107 | 0,059 |
| 0,228 | 0,144 | Chitinase inhibitor                        | 0,336 | 0,288 |
| 0,107 | 0,023 | 4-Pyridoxolactonase inhibitor              | 0,107 | 0,059 |
| 0,133 | 0,049 | UDP-glucose-hexose-1-phosphate uridyly     | 0,119 | 0,071 |
| 0,173 | 0,090 | N-(long-chain-acyl)ethanolamine deacyla    | 0,151 | 0,103 |
| 0,168 | 0,085 | Atrolysin A inhibitor                      | 0,122 | 0,074 |
| 0,152 | 0,070 | 3-Chloro-D-alanine dehydrochlorinase inl   | 0,178 | 0,131 |
| 0,165 | 0,083 | Transforming growth factor beta 1 agonis   | 0,055 | 0,008 |

|       |       |                                            |       |       |
|-------|-------|--------------------------------------------|-------|-------|
| 0,119 | 0,037 | Isomaltulose synthase inhibitor            | 0,088 | 0,041 |
| 0,140 | 0,059 | Adenylyl-sulfate kinase inhibitor          | 0,102 | 0,055 |
| 0,180 | 0,098 | Chaperonin ATPase inhibitor                | 0,149 | 0,103 |
| 0,095 | 0,013 | Multidrug resistance-associated protein ii | 0,056 | 0,009 |
| 0,237 | 0,156 | Antineoplastic (solid tumors)              | 0,124 | 0,078 |
| 0,142 | 0,061 | 2-Dehydropantoate aldolase inhibitor       | 0,089 | 0,043 |
| 0,138 | 0,057 | Sulfate adenylyltransferase (ADP) inhibiti | 0,160 | 0,114 |
| 0,139 | 0,059 | Glucosamine-6-phosphate deaminase inh      | 0,072 | 0,026 |
| 0,165 | 0,085 | ADP-ribosylarginine hydrolase inhibitor    | 0,074 | 0,029 |
| 0,157 | 0,078 | Tyrosine kinase stimulant                  | 0,123 | 0,078 |
| 0,160 | 0,081 | Serratia marcescens nuclease inhibitor     | 0,095 | 0,050 |
| 0,114 | 0,035 | Tagaturonate reductase inhibitor           | 0,139 | 0,094 |
| 0,114 | 0,035 | Fructuronate reductase inhibitor           | 0,150 | 0,105 |
| 0,143 | 0,065 | Dolichyl-phosphatase inhibitor             | 0,194 | 0,149 |
| 0,135 | 0,057 | Mannose-6-phosphate isomerase inhibiti     | 0,123 | 0,078 |
| 0,091 | 0,013 | Multidrug resistance-associated protein 10 | 0,123 | 0,078 |
| 0,142 | 0,065 | Antineoplastic (gastric cancer)            | 0,092 | 0,048 |
| 0,137 | 0,060 | Glutamate-1-semialdehyde 2,1-aminomu       | 0,099 | 0,055 |
| 0,126 | 0,049 | Pyrimidine-deoxynucleoside 2'-dioxygena    | 0,112 | 0,068 |
| 0,115 | 0,038 | Octadecanal decarbonylase inhibitor        | 0,127 | 0,083 |
| 0,143 | 0,067 | Iron-cytochrome-c reductase inhibitor      | 0,075 | 0,031 |
| 0,246 | 0,170 | Superoxide dismutase inhibitor             | 0,112 | 0,068 |
| 0,175 | 0,099 | Mucolytic                                  | 0,190 | 0,146 |
| 0,176 | 0,099 | Bone formation stimulant                   | 0,102 | 0,058 |
| 0,150 | 0,074 | 2-Haloacid dehalogenase (configuration-i   | 0,242 | 0,198 |
| 0,138 | 0,062 | Selenocysteine lyase inhibitor             | 0,085 | 0,041 |
| 0,120 | 0,045 | MAP-kinase-activated kinase 2 inhibitor    | 0,139 | 0,095 |
| 0,131 | 0,055 | D-lactate dehydrogenase (cytochrome) in    | 0,126 | 0,083 |
| 0,219 | 0,143 | Aldosterone antagonist                     | 0,115 | 0,072 |
| 0,125 | 0,049 | Antispirochetal                            | 0,072 | 0,029 |
| 0,348 | 0,273 | Nootropic                                  | 0,160 | 0,117 |
| 0,140 | 0,065 | Thiamine-phosphate kinase inhibitor        | 0,160 | 0,117 |
| 0,138 | 0,064 | BRAF expression inhibitor                  | 0,101 | 0,059 |
| 0,210 | 0,136 | Chloride channel blocker                   | 0,125 | 0,082 |
| 0,115 | 0,041 | Aromatic-amino-acid transaminase inhibi    | 0,051 | 0,008 |
| 0,114 | 0,040 | 2-Hydroxy-3-oxopropionate reductase inl    | 0,106 | 0,064 |
| 0,096 | 0,022 | CDC25C inhibitor                           | 0,132 | 0,090 |
| 0,125 | 0,050 | Antitreponemal                             | 0,157 | 0,115 |
| 0,098 | 0,024 | SULT2A1 substrate                          | 0,131 | 0,090 |
| 0,121 | 0,047 | Cyclooxygenase 1 inhibitor                 | 0,095 | 0,053 |
| 0,162 | 0,088 | Sphingosine 1-phosphate receptor 1 anta    | 0,059 | 0,017 |
| 0,134 | 0,061 | Glycogen (starch) synthase inhibitor       | 0,083 | 0,043 |
| 0,134 | 0,062 | Agmatinase inhibitor                       | 0,069 | 0,028 |
| 0,128 | 0,057 | Steroid 9alpha-monooxygenase inhibitor     | 0,109 | 0,068 |
| 0,090 | 0,018 | Protein kinase A inhibitor                 | 0,215 | 0,174 |
| 0,120 | 0,049 | Alpha,alpha-trehalase inhibitor            | 0,141 | 0,101 |
| 0,151 | 0,081 | Leucolysin inhibitor                       | 0,067 | 0,027 |

|       |       |                                            |       |       |
|-------|-------|--------------------------------------------|-------|-------|
| 0,154 | 0,083 | Leishmanolysin inhibitor                   | 0,063 | 0,023 |
| 0,111 | 0,041 | Deoxyribonuclease (pyrimidine dimer) inhi  | 0,100 | 0,060 |
| 0,179 | 0,108 | Antineoplastic (non-small cell lung cancer | 0,109 | 0,069 |
| 0,120 | 0,049 | Trehalose-phosphatase inhibitor            | 0,095 | 0,056 |
| 0,108 | 0,038 | Chelator                                   | 0,070 | 0,030 |
| 0,180 | 0,110 | Retinal dehydrogenase inhibitor            | 0,093 | 0,053 |
| 0,162 | 0,092 | Glucuronate isomerase inhibitor            | 0,103 | 0,064 |
| 0,108 | 0,038 | Monocarboxylic acid transporter 1 inhibit  | 0,100 | 0,061 |
| 0,108 | 0,038 | Monocarboxylic acid transporter inhibitor  | 0,103 | 0,064 |
| 0,169 | 0,099 | Urate-ribonucleotide phosphorylase inhi    | 0,095 | 0,056 |
| 0,086 | 0,016 | Dihydroxyacetanilide epoxidase inhibitor   | 0,102 | 0,063 |
| 0,086 | 0,016 | Dihydroxyacetanilide dehydrogenase inhi    | 0,167 | 0,129 |
| 0,128 | 0,058 | D-cysteine desulfhydrase inhibitor         | 0,044 | 0,006 |
| 0,149 | 0,079 | Geranylgeranyl-diphosphate geranylgerar    | 0,059 | 0,021 |
| 0,136 | 0,067 | Beta-alanine-pyruvate transaminase inhi    | 0,168 | 0,130 |
| 0,136 | 0,067 | Galactose 1-dehydrogenase (NADP+) inhi     | 0,079 | 0,042 |
| 0,075 | 0,005 | Phosphatidylinositol 3-kinase gamma inhi   | 0,105 | 0,068 |
| 0,149 | 0,080 | Pyruvate carboxylase inhibitor             | 0,113 | 0,076 |
| 0,100 | 0,031 | 3(or 17)beta-hydroxysteroid dehydrogen     | 0,139 | 0,102 |
| 0,083 | 0,014 | 4-Hydroxyphenylacetate 1-monooxygena       | 0,119 | 0,083 |
| 0,123 | 0,054 | Porphobilinogen synthase inhibitor         | 0,110 | 0,074 |
| 0,130 | 0,061 | Carnitine dehydratase inhibitor            | 0,099 | 0,064 |
| 0,110 | 0,042 | Insulin sensitizer                         | 0,107 | 0,071 |
| 0,115 | 0,046 | Aconitate decarboxylase inhibitor          | 0,120 | 0,085 |
| 0,188 | 0,119 | Aspergillopepsin II inhibitor              | 0,182 | 0,147 |
| 0,164 | 0,096 | Procollagen N-endopeptidase inhibitor      | 0,046 | 0,011 |
| 0,279 | 0,211 | Glycerol-ether monooxygenase inhibitor     | 0,073 | 0,039 |
| 0,151 | 0,084 | Allyl-alcohol dehydrogenase inhibitor      | 0,129 | 0,095 |
| 0,102 | 0,034 | CYP26 substrate                            | 0,079 | 0,045 |
| 0,085 | 0,018 | Potassium channel large-conductance Ca-    | 0,123 | 0,089 |
| 0,072 | 0,005 | FtsZ polymerization inhibitor              | 0,126 | 0,093 |
| 0,156 | 0,089 | Niemann-Pick C1-like 1 protein antagonis   | 0,122 | 0,088 |
| 0,116 | 0,049 | UDP-glucose 4-epimerase inhibitor          | 0,111 | 0,077 |
| 0,146 | 0,079 | N-Acyl-D-amino-acid deacylase inhibitor    | 0,109 | 0,076 |
| 0,125 | 0,058 | Phosphonoacetate hydrolase inhibitor       | 0,064 | 0,031 |
| 0,106 | 0,040 | Hair growth stimulant                      | 0,070 | 0,038 |
| 0,140 | 0,074 | Quinoline-4-carboxylate 2-oxidoreductas    | 0,195 | 0,163 |
| 0,099 | 0,033 | Epoxide hydrolase substrate                | 0,128 | 0,096 |
| 0,110 | 0,044 | 1,5-Anhydro-D-fructose reductase inhibit   | 0,128 | 0,096 |
| 0,076 | 0,010 | Tyrosine phenol-lyase inhibitor            | 0,082 | 0,050 |
| 0,120 | 0,054 | Phenylalanine 4-hydroxylase inhibitor      | 0,133 | 0,101 |
| 0,132 | 0,067 | 5 Hydroxytryptamine 2A agonist             | 0,091 | 0,060 |
| 0,083 | 0,018 | Prolyl endopeptidase inhibitor             | 0,087 | 0,056 |
| 0,121 | 0,056 | Glucosamine-1-phosphate N-acetyltransf     | 0,126 | 0,095 |
| 0,123 | 0,058 | Aldehyde dehydrogenase [NAD(P)+] inhib     | 0,140 | 0,108 |
| 0,083 | 0,018 | Glutamate (mGluR1) agonist                 | 0,237 | 0,206 |
| 0,219 | 0,155 | Aspergillopepsin I inhibitor               | 0,171 | 0,140 |

|       |       |                                            |       |       |
|-------|-------|--------------------------------------------|-------|-------|
| 0,093 | 0,028 | Pim-2 kinase inhibitor                     | 0,081 | 0,050 |
| 0,112 | 0,049 | Arylamine N-Acetyltransferase substrate    | 0,095 | 0,064 |
| 0,111 | 0,048 | Deoxycytidine deaminase inhibitor          | 0,096 | 0,065 |
| 0,074 | 0,010 | 4-Hydroxybenzoate 3-monooxygenase [N       | 0,135 | 0,104 |
| 0,139 | 0,076 | GST T1-1 substrate                         | 0,116 | 0,086 |
| 0,139 | 0,076 | GST T substrate                            | 0,035 | 0,005 |
| 0,068 | 0,004 | Opioid delta 2 receptor antagonist         | 0,137 | 0,107 |
| 0,085 | 0,022 | Mandelate racemase inhibitor               | 0,055 | 0,024 |
| 0,098 | 0,036 | Mycodextranase inhibitor                   | 0,064 | 0,034 |
| 0,116 | 0,054 | Leucine transaminase inhibitor             | 0,099 | 0,070 |
| 0,105 | 0,042 | 3-Deoxy-8-phosphooctulonate synthase i     | 0,048 | 0,018 |
| 0,149 | 0,087 | Nucleoside-diphosphatase inhibitor         | 0,095 | 0,065 |
| 0,070 | 0,009 | Anhydrotetracycline monooxygenase inhi     | 0,089 | 0,060 |
| 0,078 | 0,017 | Secretase beta 1 inhibitor                 | 0,107 | 0,078 |
| 0,117 | 0,056 | Aspartate racemase inhibitor               | 0,050 | 0,021 |
| 0,116 | 0,055 | Chondroitin 6-sulfotransferase inhibitor   | 0,081 | 0,052 |
| 0,134 | 0,073 | Protein-tyrosine sulfotransferase inhibito | 0,107 | 0,079 |
| 0,114 | 0,053 | Shikimate kinase inhibitor                 | 0,133 | 0,104 |
| 0,087 | 0,026 | Alpha,alpha-phosphotrehalase inhibitor     | 0,098 | 0,070 |
| 0,199 | 0,138 | Vascular dementia treatment                | 0,145 | 0,117 |
| 0,151 | 0,091 | Sterol 3-beta-glucosyltransferase inhibito | 0,179 | 0,151 |
| 0,090 | 0,030 | Steroid sulfotransferase inhibitor         | 0,130 | 0,102 |
| 0,112 | 0,052 | Gluconate dehydratase inhibitor            | 0,066 | 0,038 |
| 0,163 | 0,103 | Anthrax lethal factor inhibitor            | 0,063 | 0,036 |
| 0,068 | 0,008 | Chelator, Iron                             | 0,085 | 0,058 |
| 0,087 | 0,027 | 3-Oxoacyl-[acyl-carrier-protein] synthase  | 0,058 | 0,031 |
| 0,106 | 0,047 | Dichloromuconate cycloisomerase inhibit    | 0,096 | 0,069 |
| 0,113 | 0,053 | Aerobactin synthase inhibitor              | 0,087 | 0,060 |
| 0,129 | 0,070 | Interferon gamma antagonist                | 0,045 | 0,018 |
| 0,251 | 0,191 | Cyclic AMP agonist                         | 0,083 | 0,056 |
| 0,099 | 0,040 | 6,7-Dihydropteridine reductase inhibitor   | 0,160 | 0,133 |
| 0,095 | 0,036 | Inositol-3-phosphate synthase inhibitor    | 0,038 | 0,011 |
| 0,146 | 0,087 | Polar-amino-acid-transporting ATPase inh   | 0,101 | 0,075 |
| 0,189 | 0,130 | Phosphatidylcholine-sterol O-acyltransfer  | 0,083 | 0,056 |
| 0,131 | 0,073 | Interferon antagonist                      | 0,071 | 0,044 |
| 0,172 | 0,114 | Antihypotensive                            | 0,100 | 0,074 |
| 0,089 | 0,031 | DNA repair enzyme inhibitor                | 0,107 | 0,081 |
| 0,138 | 0,081 | VCAM1 expression inhibitor                 | 0,082 | 0,057 |
| 0,164 | 0,107 | Serine-pyruvate transaminase inhibitor     | 0,105 | 0,079 |
| 0,062 | 0,005 | Opioid delta 1 receptor antagonist         | 0,072 | 0,047 |
| 0,114 | 0,057 | Acetoin dehydrogenase inhibitor            | 0,127 | 0,102 |
| 0,102 | 0,045 | 2-Dehydro-3-deoxy-L-arabinonate dehyd      | 0,074 | 0,049 |
| 0,197 | 0,140 | CYP2C9 inhibitor                           | 0,078 | 0,053 |
| 0,119 | 0,062 | NADH dehydrogenase inhibitor               | 0,110 | 0,085 |
| 0,110 | 0,053 | Triose-phosphate isomerase inhibitor       | 0,101 | 0,076 |
| 0,075 | 0,018 | Protein kinase C delta inhibitor           | 0,220 | 0,195 |
| 0,078 | 0,022 | Leukotriene C antagonist                   | 0,102 | 0,078 |



|       |       |                                                                         |       |       |
|-------|-------|-------------------------------------------------------------------------|-------|-------|
| 0,146 | 0,090 | Aspartoacylase inhibitor                                                | 0,050 | 0,026 |
| 0,120 | 0,064 | Fructose-2,6-bisphosphate 2-phosphatase                                 | 0,103 | 0,079 |
| 0,072 | 0,017 | Catechol O methyltransferase inhibitor                                  | 0,121 | 0,097 |
| 0,098 | 0,043 | c-Src kinase inhibitor                                                  | 0,035 | 0,011 |
| 0,061 | 0,006 | Orsellinate decarboxylase inhibitor                                     | 0,116 | 0,092 |
| 0,109 | 0,054 | Ribitol 2-dehydrogenase inhibitor                                       | 0,116 | 0,092 |
| 0,076 | 0,021 | Opioid mu 1 receptor antagonist                                         | 0,122 | 0,098 |
| 0,109 | 0,054 | Glucan 1,3-beta-glucosidase inhibitor                                   | 0,173 | 0,149 |
| 0,135 | 0,081 | Aldehyde ferredoxin oxidoreductase inhibitor                            | 0,064 | 0,040 |
| 0,079 | 0,024 | Adenosine deaminase inhibitor                                           | 0,103 | 0,079 |
| 0,094 | 0,040 | Ornithine decarboxylase inhibitor                                       | 0,198 | 0,175 |
| 0,120 | 0,066 | Poly(ADP-ribose) glycohydrolase inhibitor                               | 0,084 | 0,061 |
| 0,070 | 0,015 | 4-Hydroxyphenylpyruvate dioxygenase inhibitor                           | 0,111 | 0,089 |
| 0,106 | 0,052 | Iron antagonist                                                         | 0,110 | 0,088 |
| 0,119 | 0,065 | Carboxylesterase inhibitor                                              | 0,101 | 0,079 |
| 0,127 | 0,074 | Galactoside O-acetyltransferase inhibitor                               | 0,076 | 0,054 |
| 0,112 | 0,058 | Pantothenase inhibitor                                                  | 0,076 | 0,054 |
| 0,116 | 0,064 | Glycopeptide alpha-N-acetylgalactosaminidase inhibitor                  | 0,129 | 0,107 |
| 0,235 | 0,182 | Lysyl oxidase inhibitor                                                 | 0,233 | 0,211 |
| 0,130 | 0,078 | Liver X receptor antagonist                                             | 0,094 | 0,073 |
| 0,141 | 0,089 | Tryptophan transaminase inhibitor                                       | 0,088 | 0,067 |
| 0,116 | 0,064 | Pectin lyase inhibitor                                                  | 0,099 | 0,078 |
| 0,083 | 0,031 | Pyridoxamine-phosphate oxidase inhibitor                                | 0,071 | 0,050 |
| 0,083 | 0,031 | Oxytocin agonist                                                        | 0,153 | 0,132 |
| 0,152 | 0,100 | Hydroxymethylglutaryl-CoA lyase inhibitor                               | 0,098 | 0,078 |
| 0,107 | 0,055 | Ca <sup>2+</sup> -transporting ATPase inhibitor                         | 0,087 | 0,066 |
| 0,103 | 0,052 | Ketohexokinase inhibitor                                                | 0,082 | 0,061 |
| 0,056 | 0,005 | Protein kinase C beta I inhibitor                                       | 0,068 | 0,048 |
| 0,266 | 0,215 | Intermittent claudication treatment                                     | 0,073 | 0,053 |
| 0,166 | 0,115 | Cyclopropane-fatty-acyl-phospholipid synthase inhibitor                 | 0,128 | 0,108 |
| 0,126 | 0,074 | Aryl-alcohol dehydrogenase inhibitor                                    | 0,105 | 0,085 |
| 0,106 | 0,056 | Adenylylsulphatase inhibitor                                            | 0,145 | 0,125 |
| 0,119 | 0,068 | ATP adenylyltransferase inhibitor                                       | 0,101 | 0,081 |
| 0,089 | 0,038 | High-mannose-oligosaccharide beta-1,4-N-acetylglucosaminidase inhibitor | 0,065 | 0,045 |
| 0,133 | 0,082 | Phosphoinositide phospholipase C inhibitor                              | 0,103 | 0,085 |
| 0,146 | 0,095 | Polynucleotide 5'-hydroxy-kinase inhibitor                              | 0,043 | 0,024 |
| 0,101 | 0,051 | Heme oxygenase inhibitor                                                | 0,094 | 0,076 |
| 0,116 | 0,067 | Cysteine desulfurase inhibitor                                          | 0,102 | 0,084 |
| 0,162 | 0,112 | Galactolipase inhibitor                                                 | 0,144 | 0,126 |
| 0,099 | 0,049 | UDP-N-acetylglucosamine diphosphorylase inhibitor                       | 0,102 | 0,084 |
| 0,113 | 0,064 | L-galactonolactone oxidase inhibitor                                    | 0,059 | 0,041 |
| 0,091 | 0,042 | Isoamylase inhibitor                                                    | 0,103 | 0,086 |
| 0,083 | 0,035 | N-acetylglucosaminyl diphosphoundecapryl transferase inhibitor          | 0,099 | 0,082 |
| 0,094 | 0,045 | Phosphomevalonate kinase inhibitor                                      | 0,091 | 0,074 |
| 0,123 | 0,075 | Valine decarboxylase inhibitor                                          | 0,099 | 0,082 |
| 0,054 | 0,006 | Purinergic P2X4 antagonist                                              | 0,197 | 0,180 |
| 0,119 | 0,071 | UDP-N-acetylglucosamine-dolichyl-phosphate transferase inhibitor        | 0,037 | 0,020 |

|       |       |                                           |       |       |
|-------|-------|-------------------------------------------|-------|-------|
| 0,064 | 0,016 | CYP3A11 substrate                         | 0,037 | 0,020 |
| 0,114 | 0,066 | Cytidine deaminase inhibitor              | 0,138 | 0,121 |
| 0,120 | 0,072 | 2,2-Dialkylglycine decarboxylase (pyruvat | 0,117 | 0,100 |
| 0,120 | 0,072 | NAD(P)+ transhydrogenase (B-specific) inl | 0,073 | 0,056 |
| 0,133 | 0,086 | Aldehyde dehydrogenase (NADP+) inhibit    | 0,092 | 0,076 |
| 0,098 | 0,051 | Gluconokinase inhibitor                   | 0,070 | 0,055 |
| 0,155 | 0,107 | Rhodotorulapepsin inhibitor               | 0,068 | 0,052 |
| 0,194 | 0,146 | Gingipain K inhibitor                     | 0,144 | 0,129 |
| 0,123 | 0,075 | Acid-sensing ion channel blocker          | 0,070 | 0,055 |
| 0,095 | 0,047 | N-acetylneuraminat lyase inhibitor        | 0,152 | 0,136 |
| 0,094 | 0,047 | Cellobiose phosphorylase inhibitor        | 0,133 | 0,118 |
| 0,077 | 0,030 | Steroid DELTA-isomerase inhibitor         | 0,072 | 0,056 |
| 0,084 | 0,038 | Protein kinase B stimulant                | 0,132 | 0,118 |
| 0,088 | 0,042 | Oxaloacetate decarboxylase inhibitor      | 0,123 | 0,109 |
| 0,072 | 0,026 | Osmotic diuretic                          | 0,078 | 0,064 |
| 0,090 | 0,044 | Arginine decarboxylase inhibitor          | 0,053 | 0,039 |
| 0,114 | 0,068 | Trimethyllysine dioxygenase inhibitor     | 0,081 | 0,067 |
| 0,095 | 0,049 | Choline sulfotransferase inhibitor        | 0,071 | 0,057 |
| 0,145 | 0,099 | Glyoxylate reductase (NADP+) inhibitor    | 0,191 | 0,177 |
| 0,113 | 0,067 | Lactaldehyde reductase (NADPH) inhibito   | 0,119 | 0,106 |
| 0,101 | 0,055 | Mannonate dehydratase inhibitor           | 0,065 | 0,051 |
| 0,089 | 0,044 | 2-Methylcitrate dehydratase inhibitor     | 0,051 | 0,037 |
| 0,076 | 0,031 | Adenosine A3 receptor antagonist          | 0,087 | 0,074 |
| 0,089 | 0,044 | L-fuconate dehydratase inhibitor          | 0,077 | 0,064 |
| 0,115 | 0,070 | Mevalonate kinase inhibitor               | 0,063 | 0,050 |
| 0,121 | 0,076 | Secretase alpha stimulant                 | 0,038 | 0,025 |
| 0,121 | 0,076 | Secretase stimulant                       | 0,032 | 0,020 |
| 0,117 | 0,072 | Isovaleryl-CoA dehydrogenase inhibitor    | 0,119 | 0,106 |
| 0,081 | 0,036 | Aralkylamine dehydrogenase inhibitor      | 0,035 | 0,023 |
| 0,092 | 0,048 | Muconate cycloisomerase inhibitor         | 0,050 | 0,039 |
| 0,150 | 0,105 | Microtubule formation inhibitor           | 0,106 | 0,094 |
| 0,176 | 0,131 | Nardilysin inhibitor                      | 0,077 | 0,066 |
| 0,122 | 0,078 | 3-Isopropylmalate dehydratase inhibitor   | 0,068 | 0,057 |
| 0,102 | 0,057 | Beta amyloid protein antagonist           | 0,097 | 0,086 |
| 0,093 | 0,049 | Saccharopine dehydrogenase (NAD+, L-gl    | 0,048 | 0,037 |
| 0,099 | 0,055 | Valine dehydrogenase (NADP+) inhibitor    | 0,135 | 0,124 |
| 0,115 | 0,071 | Glycoprotein 3-alpha-L-fucosyltransferasε | 0,091 | 0,081 |
| 0,094 | 0,050 | Haloalkane dehalogenase inhibitor         | 0,119 | 0,108 |
| 0,067 | 0,023 | Secretase beta inhibitor                  | 0,089 | 0,079 |
| 0,258 | 0,215 | Prion diseases treatment                  | 0,031 | 0,021 |
| 0,149 | 0,106 | Glutathione peroxidase inhibitor          | 0,094 | 0,084 |
| 0,103 | 0,060 | Formaldehyde dehydrogenase inhibitor      | 0,083 | 0,073 |
| 0,063 | 0,020 | Aryl hydrocarbon receptor antagonist      | 0,118 | 0,109 |
| 0,103 | 0,061 | Nicotinamidase inhibitor                  | 0,118 | 0,109 |
| 0,160 | 0,118 | Carboxypeptidase D inhibitor              | 0,041 | 0,032 |
| 0,083 | 0,041 | 3-Dehydroquinat dehydratase inhibitor     | 0,072 | 0,063 |
| 0,045 | 0,004 | NAD(P)H dehydrogenase (quinone) 1 inhi    | 0,051 | 0,042 |

|       |       |                                             |       |       |
|-------|-------|---------------------------------------------|-------|-------|
| 0,106 | 0,064 | Alpha-N-acetylgalactosaminidase inhibitor   | 0,074 | 0,065 |
| 0,107 | 0,066 | Beta-mannosidase inhibitor                  | 0,066 | 0,057 |
| 0,083 | 0,042 | Leukotriene antagonist                      | 0,084 | 0,076 |
| 0,064 | 0,023 | Dual specificity protein phosphatase VHR    | 0,046 | 0,038 |
| 0,073 | 0,033 | Phenylalanine 2-monooxygenase inhibitor     | 0,042 | 0,033 |
| 0,160 | 0,120 | Pediculicide                                | 0,133 | 0,124 |
| 0,113 | 0,073 | Formate dehydrogenase inhibitor             | 0,026 | 0,018 |
| 0,109 | 0,069 | (S)-carnitine 3-dehydrogenase inhibitor     | 0,043 | 0,035 |
| 0,084 | 0,044 | Succinate-semialdehyde dehydrogenase i      | 0,063 | 0,055 |
| 0,106 | 0,066 | Photinus-luciferin 4-monooxygenase (ATF     | 0,105 | 0,097 |
| 0,149 | 0,110 | Glutamate 5-kinase inhibitor                | 0,135 | 0,128 |
| 0,125 | 0,086 | Ganglioside galactosyltransferase inhibitor | 0,069 | 0,062 |
| 0,102 | 0,064 | Aspartate-ammonia ligase (ADP-forming)      | 0,137 | 0,130 |
| 0,110 | 0,072 | Aspartate kinase inhibitor                  | 0,059 | 0,053 |
| 0,083 | 0,045 | Beta 1 adrenoreceptor agonist               | 0,086 | 0,080 |
| 0,048 | 0,010 | Vitamin K-like                              | 0,156 | 0,150 |
| 0,138 | 0,100 | Hydroxymethylbilane synthase inhibitor      | 0,075 | 0,069 |
| 0,138 | 0,100 | Cystinyl aminopeptidase inhibitor           | 0,201 | 0,195 |
| 0,187 | 0,150 | Trimethylamine dehydrogenase inhibitor      | 0,072 | 0,067 |
| 0,071 | 0,034 | Arabinogalactan endo-1,4-beta-galactosic    | 0,047 | 0,042 |
| 0,120 | 0,082 | CYP4B1 substrate                            | 0,089 | 0,083 |
| 0,142 | 0,105 | Arylamine N-acetyltransferase inhibitor     | 0,089 | 0,083 |
| 0,095 | 0,058 | Lysine decarboxylase inhibitor              | 0,115 | 0,110 |
| 0,070 | 0,033 | CYP24 inhibitor                             | 0,143 | 0,138 |
| 0,089 | 0,052 | Beta-amylase inhibitor                      | 0,175 | 0,170 |
| 0,070 | 0,034 | Protein kinase C mu inhibitor               | 0,048 | 0,043 |
| 0,072 | 0,036 | Prephenate dehydratase inhibitor            | 0,125 | 0,120 |
| 0,140 | 0,104 | Signal peptidase I inhibitor                | 0,022 | 0,018 |
| 0,195 | 0,159 | Choline-phosphate cytidyltransferase in     | 0,044 | 0,039 |
| 0,111 | 0,075 | Bronchodilator                              | 0,075 | 0,071 |
| 0,079 | 0,043 | (S)-2-Methylmalate dehydratase inhibitor    | 0,058 | 0,054 |
| 0,086 | 0,050 | (R)-aminopropanol dehydrogenase inhibi      | 0,105 | 0,101 |
| 0,101 | 0,066 | Chloramphenicol O-acetyltransferase inhi    | 0,100 | 0,097 |
| 0,123 | 0,088 | CYP4B substrate                             | 0,111 | 0,108 |
| 0,050 | 0,015 | Protocatechuate 4,5-dioxygenase inhibitor   | 0,076 | 0,073 |
| 0,102 | 0,067 | Putrescine oxidase inhibitor                | 0,072 | 0,069 |
| 0,129 | 0,094 | Penicillopepsin inhibitor                   | 0,084 | 0,081 |
| 0,129 | 0,094 | Hepatocyte nuclear factor 4 alpha antago    | 0,055 | 0,052 |
| 0,129 | 0,094 | Hepatocyte nuclear factor antagonist        | 0,120 | 0,118 |
| 0,128 | 0,094 | MDM2 inhibitor                              | 0,100 | 0,098 |
| 0,145 | 0,110 | Dolichol kinase inhibitor                   | 0,173 | 0,171 |
| 0,116 | 0,082 | Glycosylphosphatidylinositol diacylglycer   | 0,082 | 0,080 |
| 0,122 | 0,088 | Carboxypeptidase E inhibitor                | 0,089 | 0,088 |
| 0,064 | 0,031 | Catechol 2,3-dioxygenase inhibitor          | 0,104 | 0,103 |
| 0,096 | 0,062 | Thiamine-phosphate diphosphorylase inh      | 0,089 | 0,089 |
| 0,120 | 0,087 | Antiprotozoal (Babesia)                     | 0,091 | 0,090 |
| 0,123 | 0,091 | Dolichyl-phosphate beta-D-mannosyltran      | 0,077 | 0,077 |

|       |       |                                                               |       |       |
|-------|-------|---------------------------------------------------------------|-------|-------|
| 0,136 | 0,103 | Alpha-amylase inhibitor                                       | 0,029 | 0,029 |
| 0,131 | 0,098 | Glutamate synthase (ferredoxin) inhibitor                     | 0,055 | 0,055 |
| 0,054 | 0,022 | Aldehyde dehydrogenase 3 substrate                            |       |       |
| 0,117 | 0,084 | Biotin carboxylase inhibitor                                  |       |       |
| 0,136 | 0,104 | Acetylspermidine deacetylase inhibitor                        |       |       |
| 0,098 | 0,066 | Glutamate (mGluR6) antagonist                                 |       |       |
| 0,196 | 0,164 | Peptidyl-dipeptidase Dcp inhibitor                            |       |       |
| 0,138 | 0,106 | Carnosine synthase inhibitor                                  |       |       |
| 0,064 | 0,032 | Lipase inhibitor                                              |       |       |
| 0,122 | 0,091 | Glycine receptor agonist                                      |       |       |
| 0,072 | 0,041 | Tubulin-tyrosine ligase inhibitor                             |       |       |
| 0,095 | 0,064 | Deoxyribonuclease X inhibitor                                 |       |       |
| 0,118 | 0,088 | Acylglycerone-phosphate reductase inhibitor                   |       |       |
| 0,072 | 0,042 | Lactaldehyde dehydrogenase inhibitor                          |       |       |
| 0,074 | 0,044 | Lactate-malate transhydrogenase inhibitor                     |       |       |
| 0,077 | 0,047 | 2-Dehydro-3-deoxy-phosphogluconate aldolase inhibitor         |       |       |
| 0,163 | 0,133 | Flavin-containing monooxygenase inhibitor                     |       |       |
| 0,203 | 0,174 | Antiviral (CMV)                                               |       |       |
| 0,228 | 0,198 | CDP-diacylglycerol-serine O-phosphatidyltransferase inhibitor |       |       |
| 0,101 | 0,072 | Glutamine-tRNA ligase inhibitor                               |       |       |
| 0,097 | 0,068 | Glyceraldehyde-3-phosphate dehydrogenase (NADP+) inhibitor    |       |       |
| 0,097 | 0,068 | Choline dehydrogenase inhibitor                               |       |       |
| 0,099 | 0,070 | Antifungal enhancer                                           |       |       |
| 0,072 | 0,042 | Glyceraldehyde-3-phosphate dehydrogenase inhibitor            |       |       |
| 0,056 | 0,027 | Protein kinase C nu inhibitor                                 |       |       |
| 0,124 | 0,095 | Tryptophanyl aminopeptidase inhibitor                         |       |       |
| 0,085 | 0,056 | 2-Methyleneglutarate mutase inhibitor                         |       |       |
| 0,083 | 0,054 | 2-Methylcitrate synthase inhibitor                            |       |       |
| 0,092 | 0,063 | Nicotinamide-nucleotide adenyltransferase inhibitor           |       |       |
| 0,072 | 0,044 | Sucrose synthase inhibitor                                    |       |       |
| 0,050 | 0,021 | Phosphatidylinositol 3-kinase beta inhibitor                  |       |       |
| 0,081 | 0,053 | Gentamicin 2"-nucleotidyltransferase inhibitor                |       |       |
| 0,116 | 0,088 | Arylalkyl acylamidase inhibitor                               |       |       |
| 0,041 | 0,013 | Ryanodine receptor antagonist                                 |       |       |
| 0,041 | 0,013 | Ryanodine receptor 1 antagonist                               |       |       |
| 0,048 | 0,020 | Cyclohexadienyl dehydrogenase inhibitor                       |       |       |
| 0,074 | 0,046 | Transcription factor AP-1 inhibitor                           |       |       |
| 0,196 | 0,169 | Antidiabetic                                                  |       |       |
| 0,102 | 0,074 | Serine 3-dehydrogenase inhibitor                              |       |       |
| 0,076 | 0,048 | ATP deaminase inhibitor                                       |       |       |
| 0,083 | 0,056 | Cysteine transaminase inhibitor                               |       |       |
| 0,063 | 0,035 | Malate dehydrogenase (decarboxylating) inhibitor              |       |       |
| 0,085 | 0,058 | 4-Carboxymethyl-4-methylbutenolide mutase inhibitor           |       |       |
| 0,101 | 0,074 | Trypanothione-disulfide reductase inhibitor                   |       |       |
| 0,091 | 0,064 | Trimethylamine-N-oxide reductase inhibitor                    |       |       |
| 0,056 | 0,029 | Antifungal (Pneumocystis)                                     |       |       |
| 0,121 | 0,095 | Endothelin-converting enzyme inhibitor                        |       |       |

|       |       |                                                                  |
|-------|-------|------------------------------------------------------------------|
| 0,067 | 0,041 | 3-Hydroxyanthranilate 3,4-dioxygenase inhibitor                  |
| 0,090 | 0,063 | Dihydropyrimidinase inhibitor                                    |
| 0,082 | 0,056 | Succinate-hydroxymethylglutarate CoA-transferase inhibitor       |
| 0,036 | 0,010 | Phenylpyruvate tautomerase inhibitor                             |
| 0,110 | 0,084 | Acid phosphatase inhibitor                                       |
| 0,109 | 0,083 | Lysine 2-monooxygenase inhibitor                                 |
| 0,069 | 0,044 | Inositol 1,4,5-triphosphate receptor antagonist                  |
| 0,065 | 0,040 | UDP-N-acetylmuramoylalanine-D-glutamate ligase inhibitor         |
| 0,128 | 0,103 | N-Carbamoyl-D-amino acid hydrolase inhibitor                     |
| 0,101 | 0,075 | Glucose 1-dehydrogenase inhibitor                                |
| 0,057 | 0,032 | Phosphatidylinositol 3-kinase delta inhibitor                    |
| 0,112 | 0,087 | 8-Amino-7-oxononanoate synthase inhibitor                        |
| 0,055 | 0,030 | Glycolaldehyde dehydrogenase inhibitor                           |
| 0,119 | 0,095 | Cysteine synthase inhibitor                                      |
| 0,049 | 0,024 | CDK4/cyclin D1 inhibitor                                         |
| 0,083 | 0,059 | Scyllo-inosamine-4-phosphate amidinotransferase inhibitor        |
| 0,098 | 0,074 | Site-specific DNA-methyltransferase (adenine-specific) inhibitor |
| 0,109 | 0,085 | O-acetylhomoserine aminocarboxypropyltransferase inhibitor       |
| 0,053 | 0,029 | Dihydroorotate oxidase inhibitor                                 |
| 0,094 | 0,071 | Omega-amidase inhibitor                                          |
| 0,123 | 0,099 | Guanidinoacetate N-methyltransferase inhibitor                   |
| 0,067 | 0,043 | Alpha,alpha-trehalose phosphorylase inhibitor                    |
| 0,174 | 0,151 | Wound healing agent                                              |
| 0,129 | 0,106 | Allantoin racemase inhibitor                                     |
| 0,090 | 0,067 | Acyloxyacyl hydrolase inhibitor                                  |
| 0,096 | 0,074 | Galactoside 2-alpha-L-fucosyltransferase inhibitor               |
| 0,133 | 0,110 | Homoserine dehydrogenase inhibitor                               |
| 0,041 | 0,019 | Opioid kappa 1 receptor antagonist                               |
| 0,080 | 0,057 | Diamine oxidase inhibitor                                        |
| 0,138 | 0,116 | Choline kinase inhibitor                                         |
| 0,158 | 0,136 | Spasmolytic, Papaverin-like                                      |
| 0,073 | 0,051 | Endometriosis treatment                                          |
| 0,097 | 0,076 | Aryl-aldehyde dehydrogenase (NADP+) inhibitor                    |
| 0,070 | 0,048 | L-3-cyanoalanine synthase inhibitor                              |
| 0,145 | 0,124 | 5-Hydroxytryptamine 7 agonist                                    |
| 0,126 | 0,105 | Choline-sulfatase inhibitor                                      |
| 0,126 | 0,105 | 4-Hydroxybenzoate nonaprenyltransferase inhibitor                |
| 0,113 | 0,092 | Sulfur dioxygenase inhibitor                                     |
| 0,052 | 0,032 | Amylosucrase inhibitor                                           |
| 0,037 | 0,016 | Nucleoside transporters inhibitor                                |
| 0,084 | 0,063 | UDP-N-acetylglucosamine 2-epimerase inhibitor                    |
| 0,139 | 0,119 | Smooth muscle myosin light chain kinase inhibitor                |
| 0,087 | 0,067 | Beta-N-acetylgalactosaminidase inhibitor                         |
| 0,076 | 0,056 | Cyanate hydratase inhibitor                                      |
| 0,121 | 0,102 | Ferrochelatase inhibitor                                         |
| 0,179 | 0,160 | Glutaminy-peptide cyclotransferase inhibitor                     |
| 0,062 | 0,043 | Erythro-3-hydroxyaspartate ammonia-lyase inhibitor               |

0,092 0,073 Dihydrouracil oxidase inhibitor  
0,078 0,058 [myelin basic protein]-arginine N-methyltransferase inhibitor  
0,091 0,072 Glyceraldehyde-3-phosphate dehydrogenase (phosphoryla  
0,084 0,065 Squalene-hopene cyclase inhibitor  
0,068 0,049 Xylan 1,4-beta-xylosidase inhibitor  
0,083 0,064 Proline dehydrogenase inhibitor  
0,180 0,161 Limulus clotting factor C inhibitor  
0,050 0,032 Aminoacyl-tRNA hydrolase inhibitor  
0,106 0,088 DNA directed DNA polymerase inhibitor  
0,076 0,058 Alanine carboxypeptidase inhibitor  
0,121 0,103 Dihydrouracil dehydrogenase (NAD+) inhibitor  
0,078 0,061 Retinol O-fatty-acyltransferase inhibitor  
0,078 0,060 tRNA (guanine-N2-)-methyltransferase inhibitor  
0,079 0,062 L-lysine oxidase inhibitor  
0,071 0,054 CYP2C2 substrate  
0,107 0,091 Thiol S-methyltransferase inhibitor  
0,082 0,065 Interleukin 1a antagonist  
0,052 0,035 17-Beta-hydroxysteroid dehydrogenase 1 inhibitor  
0,026 0,010 Antibiotic Tetracycline-like  
0,065 0,049 L-lactate dehydrogenase (cytochrome) inhibitor  
0,068 0,051 3-Alpha-hydroxysteroid dehydrogenase (B-specific) inhibiti  
0,279 0,263 Antiviral (Picornavirus)  
0,067 0,051 Alternansucrase inhibitor  
0,086 0,071 Coproporphyrinogen oxidase inhibitor  
0,058 0,042 Tyrosine transaminase inhibitor  
0,049 0,033 Sucrose-phosphate phosphatase inhibitor  
0,121 0,105 Peptide-tryptophan 2,3-dioxygenase inhibitor  
0,093 0,078 Cholestenone 5alpha-reductase inhibitor  
0,098 0,083 MAP kinase kinase 7 inhibitor  
0,111 0,097 Saccharopine dehydrogenase (NADP+, L-glutamate-formin  
0,043 0,029 Electron transport complex I inhibitor  
0,092 0,078 Alanine transaminase inhibitor  
0,070 0,056 Phosphoribulokinase inhibitor  
0,126 0,112 4-Chlorobenzoyl-CoA dehalogenase inhibitor  
0,090 0,077 Cytochrome-c3 hydrogenase inhibitor  
0,033 0,020 Postcoital contraceptive  
0,156 0,143 Diamine N-acetyltransferase inhibitor  
0,121 0,107 Chitin synthase inhibitor  
0,074 0,060 Galactosylgalactosylglucosylceramidase inhibitor  
0,104 0,090 Rhodopsin kinase inhibitor  
0,099 0,086 Decylcitrate synthase inhibitor  
0,088 0,075 Thermomycolin inhibitor  
0,084 0,071 Glutamine-pyruvate transaminase inhibitor  
0,082 0,069 CTP synthase inhibitor  
0,057 0,045 Chitin deacetylase inhibitor  
0,092 0,080 Pyridoxal kinase inhibitor  
0,074 0,062 Phosphoenolpyruvate carboxykinase (diphosphate) inhibit

|       |       |                                                       |
|-------|-------|-------------------------------------------------------|
| 0,174 | 0,162 | CYP2C10 substrate                                     |
| 0,069 | 0,057 | Glycerophosphocholine phosphodiesterase inhibitor     |
| 0,048 | 0,036 | Protein-tyrosine phosphatase beta inhibitor           |
| 0,051 | 0,039 | Cytosolic phospholipase A2 inhibitor                  |
| 0,081 | 0,070 | D-proline reductase (dithiol) inhibitor               |
| 0,080 | 0,068 | Ribose-5-phosphate-ammonia ligase inhibitor           |
| 0,099 | 0,088 | Methionine decarboxylase inhibitor                    |
| 0,151 | 0,140 | Vascular adhesion protein 1 inhibitor                 |
| 0,040 | 0,029 | Sodium-dependent vitamin C transporter 2 inhibitor    |
| 0,070 | 0,059 | CYP4F12 substrate                                     |
| 0,105 | 0,094 | Atrolysin C inhibitor                                 |
| 0,091 | 0,080 | Glutamate N-acetyltransferase inhibitor               |
| 0,073 | 0,062 | Scytalone dehydratase inhibitor                       |
| 0,064 | 0,054 | 4-Hydroxy-4-methyl-2-oxoglutarate aldolase inhibitor  |
| 0,048 | 0,038 | Deoxyhypusine monooxygenase inhibitor                 |
| 0,040 | 0,030 | Cholesterol absorption inhibitor                      |
| 0,068 | 0,058 | Maleate hydratase inhibitor                           |
| 0,069 | 0,060 | N-acetylglucosamine-6-phosphate deacetylase inhibitor |
| 0,105 | 0,096 | Beta-ureidopropionase inhibitor                       |
| 0,064 | 0,055 | Glutamate (mGluR8) agonist                            |
| 0,180 | 0,171 | Antipsoriatic                                         |
| 0,089 | 0,080 | tRNA (cytosine-5-)-methyltransferase inhibitor        |
| 0,040 | 0,031 | Leukotriene C4 antagonist                             |
| 0,049 | 0,041 | CYP17 substrate                                       |
| 0,090 | 0,082 | D-Ornithine 4,5-aminomutase inhibitor                 |
| 0,088 | 0,080 | GABA transporter 3 inhibitor                          |
| 0,078 | 0,070 | D-malate dehydrogenase (decarboxylating) inhibitor    |
| 0,103 | 0,095 | 3-Hydroxyanthranilate oxidase inhibitor               |
| 0,063 | 0,055 | Fatty-acyl-ethyl-ester synthase inhibitor             |
| 0,099 | 0,092 | Ribonuclease inhibitor                                |
| 0,119 | 0,111 | Adenylate kinase inhibitor                            |
| 0,079 | 0,072 | Nucleotide diphosphatase inhibitor                    |
| 0,110 | 0,103 | Valine-tRNA ligase inhibitor                          |
| 0,170 | 0,163 | Cathepsin T inhibitor                                 |
| 0,065 | 0,058 | 6-Phosphofructo-2-kinase inhibitor                    |
| 0,069 | 0,062 | Glycogen synthase kinase-3 beta inhibitor             |
| 0,116 | 0,110 | Antihyperlipoproteinemic                              |
| 0,057 | 0,050 | Leukotriene B4 antagonist                             |
| 0,158 | 0,151 | Bontoxilysin inhibitor                                |
| 0,073 | 0,067 | Ribulose-bisphosphate carboxylase inhibitor           |
| 0,144 | 0,138 | Thermitase inhibitor                                  |
| 0,080 | 0,073 | Phenylalanine dehydrogenase inhibitor                 |
| 0,075 | 0,069 | Guanidinopropionase inhibitor                         |
| 0,062 | 0,055 | Plasminogen activator stimulant                       |
| 0,074 | 0,068 | Carboxylate reductase inhibitor                       |
| 0,100 | 0,094 | Malate-CoA ligase inhibitor                           |
| 0,031 | 0,025 | Protein-tyrosine phosphatase epsilon inhibitor        |

|       |       |                                                            |
|-------|-------|------------------------------------------------------------|
| 0,046 | 0,041 | Glucose-6-phosphate translocase inhibitor                  |
| 0,103 | 0,098 | Ethanolaminephosphotransferase inhibitor                   |
| 0,029 | 0,024 | DNA gyrase inhibitor                                       |
| 0,042 | 0,037 | Chorismate mutase inhibitor                                |
| 0,045 | 0,040 | Adenosine A1 receptor antagonist                           |
| 0,075 | 0,070 | Phosphofructokinase-1 inhibitor                            |
| 0,086 | 0,082 | Cholesterol oxidase inhibitor                              |
| 0,078 | 0,074 | Bis(5'-adenosyl)-triphosphatase inhibitor                  |
| 0,049 | 0,045 | Procollagen glucosyltransferase inhibitor                  |
| 0,135 | 0,132 | Guanidinoacetate kinase inhibitor                          |
| 0,123 | 0,119 | K(Ca) 3.1 channel activator                                |
| 0,123 | 0,119 | Potassium channel intermediate-conductance Ca-activated    |
| 0,051 | 0,048 | Biotin-[propionyl-CoA-carboxylase (ATP-hydrolysing)] ligas |
| 0,230 | 0,227 | Antiinflammatory, ophthalmic                               |
| 0,203 | 0,200 | Neuropeptide Y2 antagonist                                 |
| 0,041 | 0,038 | CYP1B1 inducer                                             |
| 0,039 | 0,036 | Androst-4-ene-3,17-dione monooxygenase inhibitor           |
| 0,063 | 0,060 | Peptidoglycan beta-N-acetylmuramidase inhibitor            |
| 0,059 | 0,056 | Alpha-L-rhamnosidase inhibitor                             |
| 0,201 | 0,198 | Enteropeptidase inhibitor                                  |
| 0,031 | 0,029 | Cortisol sulfotransferase inhibitor                        |
| 0,108 | 0,106 | Lanosterol 14 alpha demethylase inhibitor                  |
| 0,079 | 0,077 | Glycine transaminase inhibitor                             |
| 0,036 | 0,035 | Antimitotic, Podophyllotoxin-like                          |
| 0,097 | 0,096 | Carnitine 3-dehydrogenase inhibitor                        |
| 0,066 | 0,064 | Amino-acid racemase inhibitor                              |
| 0,024 | 0,022 | Phosphogluconate 2-dehydrogenase inhibitor                 |
| 0,080 | 0,079 | Aspartate transaminase inhibitor                           |
| 0,041 | 0,040 | Carboxy-cis,cis-muconate cyclase inhibitor                 |
| 0,052 | 0,051 | Tubuliny-Tyr carboxypeptidase inhibitor                    |
| 0,047 | 0,046 | Protein kinase C epsilon inhibitor                         |
| 0,091 | 0,090 | Sodium channel (voltage-gated) blocker                     |
| 0,174 | 0,173 | X-methyl-His dipeptidase inhibitor                         |
| 0,021 | 0,021 | 3-Oxoacyl-[acyl-carrier-protein] synthase II inhibitor     |
| 0,069 | 0,069 | Beta-D-fucosidase inhibitor                                |
| 0,060 | 0,060 | Aspartate 1-decarboxylase inhibitor                        |
| 0,038 | 0,038 | Orotidylate decarboxylase inhibitor                        |
| 0,091 | 0,091 | Interferon agonist                                         |



## Activity

Chlordecone reductase inhibitor  
HIF1A expression inhibitor  
2-Dehydropantoate 2-reductase inhibitor  
Membrane integrity agonist  
Peroxidase inhibitor  
HMOX1 expression enhancer  
Antimutagenic  
Aryl-alcohol dehydrogenase (NADP+) inhibitor  
Membrane permeability inhibitor  
Kinase inhibitor  
P-benzoquinone reductase (NADPH) inhibitor  
2-Dehydropantolactone reductase (A-specific) inhibitor  
UGT1A9 substrate  
UGT1A6 substrate  
NADPH-ferrihemoprotein reductase inhibitor  
Cystathionine beta-synthase inhibitor  
CYP1A substrate  
TP53 expression enhancer  
NADPH oxidase inhibitor  
Beta-carotene 15,15'-monooxygenase inhibitor  
Glycerol dehydrogenase (NADP+) inhibitor  
CYP1A inducer  
Antioxidant  
Quercetin 2,3-dioxygenase inhibitor  
Anaphylatoxin receptor antagonist  
CYP1A1 inducer  
CYP1A2 substrate  
MAP kinase stimulant  
Apoptosis agonist  
Alcohol dehydrogenase (NADP+) inhibitor  
CYP1A1 substrate  
Xenobiotic-transporting ATPase inhibitor  
Iodide peroxidase inhibitor  
AR expression inhibitor  
Hemostatic  
Antihemorrhagic  
UGT1A substrate  
CYP2C12 substrate  
Histidine kinase inhibitor  
Ubiquinol-cytochrome-c reductase inhibitor  
Cardioprotectant  
2-Enoate reductase inhibitor  
CYP1A inhibitor  
UGT1A1 substrate

Xanthine oxidase inhibitor  
Testosterone 17beta-dehydrogenase inhibitor  
UDP-glucuronosyltransferase substrate  
UGT1A10 substrate  
UGT1A3 substrate  
Aldehyde oxidase inhibitor  
CYP1A2 inhibitor  
CYP1A1 inhibitor  
Antineoplastic  
Lipid peroxidase inhibitor  
Free radical scavenger  
1-Alkylglycerophosphocholine O-acetyltransferase inhibitor  
UGT1A8 substrate  
NOS2 expression inhibitor  
CYP19 inhibitor  
CYP3A4 inducer  
Xanthine dehydrogenase inhibitor  
Monophenol monooxygenase inhibitor  
Creatine kinase inhibitor  
Vasoprotector  
Alcohol dehydrogenase [NAD(P)+] inhibitor  
Chalcone isomerase inhibitor  
3-Methylbutanal reductase inhibitor  
CYP19A1 expression inhibitor  
Glutathione-disulfide reductase inhibitor  
3-Oxoacyl-[acyl-carrier-protein] synthase inhibitor  
Sulfotransferase substrate  
UGT2B15 substrate  
Antiseborrheic  
Morphine 6-dehydrogenase inhibitor  
Anticarcinogenic  
Astringent  
CYP2C8 inhibitor  
CYP1B1 inhibitor  
CYP3A inducer  
APOA1 expression enhancer  
UGT2B substrate  
CYP2C substrate  
Aspulvinone dimethylallyltransferase inhibitor  
Hepatoprotectant  
Chemopreventive  
Pectate lyase inhibitor  
JAK2 expression inhibitor  
4-Nitrophenol 2-monooxygenase inhibitor  
Histamine release stimulant  
SULT1A3 substrate  
Interleukin 4 antagonist

Antiinflammatory  
Malate dehydrogenase inhibitor  
Capillary fragility treatment  
Testosterone 17beta-dehydrogenase (NADP+) inhibitor  
Chemoprotective  
CYP2C9 substrate  
MMP9 expression inhibitor  
CYP2B5 substrate  
Mucomembranous protector  
27-Hydroxycholesterol 7alpha-monooxygenase inhibitor  
Histamine release inhibitor  
Beta glucuronidase inhibitor  
Nitric oxide antagonist  
Hydroxysteroid dehydrogenase inhibitor  
RELA expression inhibitor  
UGT2B12 substrate  
CF transmembrane conductance regulator agonist  
Beta-N-acetylhexosaminidase inhibitor  
CYP2A4 substrate  
CYP2J substrate  
Proliferative diseases treatment  
Reductant  
Cholestanetriol 26-monooxygenase inhibitor  
CYP2B6 substrate  
4-Coumarate-CoA ligase inhibitor  
CYP2J2 substrate  
Plastoquinol-plastocyanin reductase inhibitor  
Leukotriene-B4 20-monooxygenase inhibitor  
Trans-1,2-dihydrobenzene-1,2-diol dehydrogenase inhibitor  
Cytoprotectant  
Histone deacetylase SIRT2 stimulant  
CYP3A4 substrate  
CYP2A6 substrate  
Histidinol dehydrogenase inhibitor  
Skin whitener  
DOPA decarboxylase inhibitor  
Kidney function stimulant  
Radiosensitizer  
Lactoylglutathione lyase inhibitor  
Radioprotector  
Fibrinolytic  
Insulysin inhibitor  
CYP2A11 substrate  
Transcription factor inhibitor  
15-Lipoxygenase inhibitor  
Antineoplastic (breast cancer)  
Telomerase inhibitor

CYP2A substrate  
Trans-acenaphthene-1,2-diol dehydrogenase inhibitor  
DNA ligase (ATP) inhibitor  
Maillard reaction inhibitor  
Thyroxine 5-deiodinase inhibitor  
Antiseptic  
Severe acute respiratory syndrome treatment  
CYP3A substrate  
Steroid N-acetylglucosaminyltransferase inhibitor  
HCV IRES inhibitor  
Pim-1 kinase inhibitor  
Sugar-phosphatase inhibitor  
Hepatic disorders treatment  
CYP2C11 substrate  
Vasodilator  
UGT1A7 substrate  
Pin1 inhibitor  
Ecdysone 20-monooxygenase inhibitor  
Oxidoreductase inhibitor  
Cytostatic  
Tetrahydroxynaphthalene reductase inhibitor  
NADPH-cytochrome-c2 reductase inhibitor  
Alcohol dehydrogenase inhibitor  
CYP2C9 inducer  
NADPH peroxidase inhibitor  
Gluconate 2-dehydrogenase (acceptor) inhibitor  
CYP3A2 substrate  
HIV-1 integrase (3'-Processing) inhibitor  
Dehydro-L-gulonate decarboxylase inhibitor  
NF-E2-related factor 2 stimulant  
CYP1B substrate  
Pyruvate kinase inhibitor  
Aryl hydrocarbon receptor agonist  
CYP2C19 substrate  
Neurotransmitter antagonist  
Ribulose-phosphate 3-epimerase inhibitor  
Antiviral (Hepatitis B)  
Platelet adhesion inhibitor  
Fatty acid synthase inhibitor  
Oxygen scavenger  
Estrogen receptor beta antagonist  
5-Hydroxytryptamine release inhibitor  
Aldose reductase inhibitor  
CYP2A2 substrate  
2-Hydroxyquinoline 8-monooxygenase inhibitor  
Alkane 1-monooxygenase inhibitor  
Mediator release inhibitor

Vascular (periferal) disease treatment  
Melanin inhibitor  
Feruloyl esterase inhibitor  
Glucan endo-1,6-beta-glucosidase inhibitor  
CYP2A5 substrate  
Estrogen antagonist  
Antiprotozoal (Leishmania)  
1-Acylglycerol-3-phosphate O-acyltransferase inhibitor  
CYP2G1 substrate  
Antineoplastic (small cell lung cancer)  
Lipid metabolism regulator  
Estrogen agonist  
Antiviral (Herpes)  
CYP3A7 substrate  
Fatty-acyl-CoA synthase inhibitor  
Phosphoenolpyruvate carboxylase inhibitor  
Endopeptidase La inhibitor  
CYP2B substrate  
Antifungal  
MAO inhibitor  
Alopecia treatment  
CYP2E substrate  
Antiprotozoal  
Glutathione thiolesterase inhibitor  
Histone deacetylase stimulant  
Histone deacetylase SIRT1 stimulant  
5 Hydroxytryptamine uptake stimulant  
NAD(P)+-arginine ADP-ribosyltransferase inhibitor  
Complement factor D inhibitor  
Nitrite reductase [NAD(P)H] inhibitor  
Prostate cancer treatment  
2,6-Dihydroxypyridine 3-monooxygenase inhibitor  
UDP-N-acetylglucosamine 4-epimerase inhibitor  
CYP2A1 substrate  
Glutamyl endopeptidase II inhibitor  
Thioredoxin inhibitor  
Antidote  
Glyoxylate oxidase inhibitor  
Nitrate reductase (cytochrome) inhibitor  
Estradiol 17 beta dehydrogenase 2 inhibitor  
HIV-1 integrase (Strand Transfer) inhibitor  
Chemosensitizer  
Estrone sulfotransferase inhibitor  
5-O-(4-coumaroyl)-D-quininate 3'-monooxygenase inhibitor  
Aminobutyraldehyde dehydrogenase inhibitor  
Lipoxygenase inhibitor  
CYP2E1 substrate

Antileukemic  
Gonadotropin antagonist  
CYP3A1 substrate  
3-Demethylubiquinone-9 3-O-methyltransferase inhibitor  
SULT1E1 substrate  
GABA C receptor antagonist  
3-Phytase inhibitor  
Alkaline phosphatase inhibitor  
HIV-1 integrase inhibitor  
Mcl-1 antagonist  
Keratolytic  
Gout treatment  
NAD(P)H dehydrogenase (quinone) inhibitor  
CYP2C6 substrate  
Estradiol 17 beta dehydrogenase inhibitor  
Antihypercholesterolemic  
Choleretic  
UGT2B4 substrate  
Antipruritic, allergic  
GST M substrate  
Nav1.5 sodium channel blocker  
Ovulation inhibitor  
Taurine dehydrogenase inhibitor  
4-Methoxybenzoate monooxygenase (O-demethylating) inhibitor  
CYP2A3 substrate  
TNF expression inhibitor  
MAO A inhibitor  
Antiprotozoal (Trypanosoma)  
CYP1B1 substrate  
CYP2B11 substrate  
UGT1A4 substrate  
Vasodilator, coronary  
Proto-oncogene tyrosine-protein kinase Fgr inhibitor  
Non-steroidal antiinflammatory agent  
CYP2F1 substrate  
Antiviral (Influenza)  
Antituberculosic  
2-Nitropropane dioxygenase inhibitor  
CTGF expression inhibitor  
Phloroglucinol reductase inhibitor  
Sulfite oxidase inhibitor  
Antidiabetic symptomatic  
CYP2E1 inducer  
2,3-Dihydroxyindole 2,3-dioxygenase inhibitor  
RNA directed DNA polymerase inhibitor  
Anti-Helicobacter pylori  
Antineoplastic (lung cancer)

Antibacterial  
P-glycoprotein inhibitor  
Acetylcholine neuromuscular blocking agent  
Aspartate-phenylpyruvate transaminase inhibitor  
Antimycobacterial  
Catechol 1,2-dioxygenase inhibitor  
Antiulcerative  
Enoyl-[acyl-carrier-protein] reductase (NADH) inhibitor  
Proteasome endopeptidase complex inhibitor  
Fusarinine-C ornithinesterase inhibitor  
Mannan endo-1,4-beta-mannosidase inhibitor  
Angiogenesis stimulant  
Quinoprotein glucose dehydrogenase inhibitor  
UGT2B28 substrate  
Caspase 3 stimulant  
Glutathione S-transferase substrate  
Topoisomerase I inhibitor  
Antiprotozoal (Plasmodium)  
Menopausal disorders treatment  
Nucleotide metabolism regulator  
Clavamate synthase inhibitor  
Platelet aggregation stimulant  
3-Hydroxybenzoate 6-monooxygenase inhibitor  
Pim kinase inhibitor  
CYP2A10 substrate  
MO15-related protein kinase Pfmrk inhibitor  
Dual specificity phosphatase 1 inhibitor  
Mycothiol-S-conjugate amidase inhibitor  
Cyclin-dependent kinase 6 inhibitor  
Dual specificity phosphatase inhibitor  
Peptide alpha-N-acetyltransferase inhibitor  
Topoisomerase II inhibitor  
1,4-Lactonase inhibitor  
P-glycoprotein 1 inhibitor  
Hydroxylamine reductase (NADH) inhibitor  
Demethylsterigmatocystin 6-O-methyltransferase inhibitor  
UGT2B1 substrate  
Sepiapterin reductase inhibitor  
Nicotine dehydrogenase inhibitor  
Trimethylamine-oxide aldolase inhibitor  
Spasmolytic  
Protein kinase (CK2) inhibitor  
Mucositis treatment  
Cis-1,2-dihydro-1,2-dihydroxynaphthalene dehydrogenase inhibitor  
SULT1A1 substrate  
Myosin ATPase inhibitor  
12-Lipoxygenase inhibitor

EIF4E expression inhibitor  
Preneoplastic conditions treatment  
UGT2B7 substrate  
Antiallergic  
Gastritis treatment  
Antiosteoporotic  
Transcription factor NF kappa B inhibitor  
Electron-transferring-flavoprotein dehydrogenase inhibitor  
CYP2D6 substrate  
Caspase 8 stimulant  
Tubulin antagonist  
Nicotinic alpha6beta3beta4alpha5 receptor antagonist  
Dextranase inhibitor  
Phthalate 4,5-dioxygenase inhibitor  
Transcription factor STAT inhibitor  
Membrane integrity antagonist  
Lactase inhibitor  
Salicylate 1-monooxygenase inhibitor  
Linoleate diol synthase inhibitor  
Glucan 1,4-alpha-maltotriohydrolase inhibitor  
Antineoplastic (cervical cancer)  
Laxative  
Threonine aldolase inhibitor  
Antineoplastic (sarcoma)  
Antithrombotic  
N-hydroxyarylamine O-acetyltransferase inhibitor  
Leukotriene-C4 synthase inhibitor  
Photosensitizer  
Protein phosphatase inhibitor  
Saccharopepsin inhibitor  
Chymosin inhibitor  
Acrocyllindropepsin inhibitor  
CYP2D substrate  
Manganese peroxidase inhibitor  
Protein-tyrosine phosphatase inhibitor  
Sulfur reductase inhibitor  
CYP2D16 substrate  
CYP2C8 inducer  
Alpha glucosidase inhibitor  
Antihypoxic  
CYP2C8 substrate  
Hyponitrite reductase inhibitor  
Vitamin-K-epoxide reductase (warfarin-insensitive) inhibitor  
GABA aminotransferase inhibitor  
Arginine 2-monooxygenase inhibitor  
Antifibrinolytic  
Glycosylphosphatidylinositol phospholipase D inhibitor



Phenol 2-monooxygenase inhibitor  
Phosphatase inhibitor  
Formate-dihydrofolate ligase inhibitor  
Thromboxane B2 antagonist  
Phosphatidylcholine-retinol O-acyltransferase inhibitor  
Antiviral  
Opioid kappa 3 receptor antagonist  
Pterin deaminase inhibitor  
Protein kinase stimulant  
Glycerol-3-phosphate oxidase inhibitor  
Cytochrome P450 inhibitor  
Protein-disulfide reductase (glutathione) inhibitor  
Linoleoyl-CoA desaturase inhibitor  
Acylcarnitine hydrolase inhibitor  
Hydrogen dehydrogenase inhibitor  
Macrophage colony stimulating factor agonist  
5-Lipoxygenase inhibitor  
Malate dehydrogenase (acceptor) inhibitor  
Antiparasitic  
UGT2B18 substrate  
Breast cancer-resistant protein inhibitor  
CYP1A2 inducer  
General pump inhibitor  
CYP2C29 substrate  
Alkenylglycerophosphocholine hydrolase inhibitor  
Arylsulfate sulfotransferase inhibitor  
CYP3A5 substrate  
Leukopoiesis stimulant  
Transcription factor NF kappa A inhibitor  
Antiuremic  
Cell wall biosynthesis inhibitor  
CYP7 inhibitor  
Bone diseases treatment  
Antineoplastic (colorectal cancer)  
Retinoic acid metabolism inhibitor  
Alkylator  
Phospholipid-translocating ATPase inhibitor  
Alkylacetylgllycerophosphatase inhibitor  
Histidine decarboxylase inhibitor  
CYP26 inhibitor  
Fructose 5-dehydrogenase inhibitor  
3-Dehydroquinase synthase inhibitor  
Analeptic  
Aldose reductase 2 inhibitor  
Magnesium-protoporphyrin IX monomethyl ester (oxidative) cyclase inhibitor  
FMO1 substrate  
Gentisate 1,2-dioxygenase inhibitor

Prunasin beta-glucosidase inhibitor  
RNA synthesis inhibitor  
Antineoplastic (colon cancer)  
(R)-6-hydroxynicotine oxidase inhibitor  
Carboxypeptidase Taq inhibitor  
Antiinfective  
Phosphopantothenoylecysteine decarboxylase inhibitor  
Glutaminase inhibitor  
Glycerol-3-phosphate dehydrogenase inhibitor  
L-glutamate oxidase inhibitor  
SMN2 expression enhancer  
Antihelminthic (Nematodes)  
ICAM1 expression inhibitor  
Estrogen beta receptor agonist  
Succinate-semialdehyde dehydrogenase [NAD(P)+] inhibitor  
Limulus clotting factor B inhibitor  
Rubredoxin-NAD<sup>+</sup> reductase inhibitor  
Fumarate reductase (NADH) inhibitor  
Hypoxia inducible factor 1 alpha inhibitor  
Prostaglandin-A1 DELTA-isomerase inhibitor  
Gluconate 5-dehydrogenase inhibitor  
Antitussive  
Dihydroxy-acid dehydratase inhibitor  
NADH kinase inhibitor  
CDP-diacylglycerol-glycerol-3-phosphate 3-phosphatidyltransferase inhibitor  
MAP kinase kinase 4 inhibitor  
S-formylglutathione hydrolase inhibitor  
Venombin AB inhibitor  
Indanol dehydrogenase inhibitor  
Glyoxylate reductase inhibitor  
Guanosine-3',5'-bis(diphosphate) 3'-diphosphatase inhibitor  
Chloride peroxidase inhibitor  
Glucan endo-1,3-beta-D-glucosidase inhibitor  
CYP2B10 substrate  
Antineoplastic (squamous cell carcinoma)  
Pseudolysin inhibitor  
Phenylpyruvate decarboxylase inhibitor  
tRNA-pseudouridine synthase I inhibitor  
Antipruritic  
Respiratory analeptic  
Antithyroid  
Endopeptidase inhibitor  
Antidyskinetic  
Antineoplastic (melanoma)  
Fructan beta-fructosidase inhibitor  
Gamma-guanidinobutyraldehyde dehydrogenase inhibitor  
Antineoplastic (glioma)

Nitrite reductase (NO-forming) inhibitor  
CYP2B2 substrate  
Phenol O-methyltransferase inhibitor  
Sweetener  
Viral entry inhibitor  
Diacylglycerol kinase inhibitor  
Exoribonuclease II inhibitor  
Protein kinase A inhibitor  
Apoptosis antagonist  
Mucinamylserine mucinaminidase inhibitor  
Hydroxylamine oxidase inhibitor  
Mannose isomerase inhibitor  
Acetylgalactosaminyl-O-glycosyl-glycoprotein beta-1,3-N-acetylglucosaminyltransferase inhibitor  
Lactaldehyde reductase inhibitor  
DNA directed RNA polymerase inhibitor  
Protein-Npi-phosphohistidine-sugar phosphotransferase inhibitor  
CYP3A4 inhibitor  
Calcium channel (voltage-sensitive) activator  
Dimethylargininase inhibitor  
UGT2B20 substrate  
Carminative  
Peroxidase substrate  
4-Hydroxymandelate oxidase inhibitor  
HIV-2 reverse transcriptase inhibitor  
Glucose oxidase inhibitor  
Carbon-monoxide dehydrogenase inhibitor  
Lysostaphin inhibitor  
Lysase inhibitor  
Phenylalanine decarboxylase inhibitor  
Sorbitol-6-phosphate 2-dehydrogenase inhibitor  
Ompin inhibitor  
Heat shock protein antagonist  
VEGF expression inhibitor  
Estrogen alpha receptor agonist  
Taurocyamine kinase inhibitor  
Opheline kinase inhibitor  
Antineoplastic (brain cancer)  
Alkenylglycerophosphoethanolamine hydrolase inhibitor  
Glycerol 2-dehydrogenase (NADP+) inhibitor  
Peptidoglycan glycosyltransferase inhibitor  
CYP2A6 inhibitor  
Lysine 2,3-aminomutase inhibitor  
Antihematotoxic  
Vomilenine glucosyltransferase inhibitor  
Malate oxidase inhibitor  
Tryptophan 2,3-dioxygenase inhibitor  
Thymidylate 5'-phosphatase inhibitor

Postmenopausal disorders treatment  
Diphosphomevalonate decarboxylase inhibitor  
Nitric oxide scavenger  
Chenodeoxycholoyltaurine hydrolase inhibitor  
Neurotrophic factor enhancer  
2-Oxoaldehyde dehydrogenase (NADP+) inhibitor  
Dermatologic  
DNA polymerase I inhibitor  
Dolichyl-diphosphooligosaccharide-protein glycotransferase inhibitor  
Cardiovascular analeptic  
Formaldehyde transketolase inhibitor  
Phenylacetaldehyde dehydrogenase inhibitor  
Polyamine-transporting ATPase inhibitor  
UGT2B9 substrate  
UGT2B17 substrate  
Shikimate 5-dehydrogenase inhibitor  
Antihelmintic  
Interleukin antagonist  
2-Pyrocatechuate decarboxylase inhibitor  
CYP2D15 substrate  
Leukotriene synthesis inhibitor  
Aryl-acylamidase inhibitor  
Erythropoiesis stimulant  
Ferredoxin hydrogenase inhibitor  
Tyrosine 3 hydroxylase inhibitor  
Tpr proteinase (Porphyromonas gingivalis) inhibitor  
Iduronate-2-sulfatase inhibitor  
3-Cyanoalanine hydratase inhibitor  
4-Hydroxyphenylacetate 3-monooxygenase inhibitor  
Vanilloid 1 agonist  
Procollagen-lysine 5-dioxygenase inhibitor  
Chitosanase inhibitor  
Antineoplastic (lymphoma)  
Amyloid beta aggregation inhibitor  
Psychosexual dysfunction treatment  
D-amino-acid dehydrogenase inhibitor  
Octopamine antagonist  
GST A substrate  
Aldehyde dehydrogenase inhibitor  
3,4-Dihydroxy-9,10-secoandrosta-1,3,5(10)-triene-9,17-dione 4,5-dioxygenase inhibitor  
Para amino benzoic acid antagonist  
Maltose-transporting ATPase inhibitor  
Glucan 1,4-alpha-maltotetrahydrolase inhibitor  
Protein-tyrosine phosphatase 1B inhibitor  
Antiviral (HIV)  
Phosphoenolpyruvate mutase inhibitor  
N-methylhydantoinase (ATP-hydrolysing) inhibitor

Deoxyribonuclease I inhibitor  
5 Hydroxytryptamine release stimulant  
Arylmalonate decarboxylase inhibitor  
Glutamine-phenylpyruvate transaminase inhibitor  
Undecaprenyldiphospho-muramoylpentapeptide beta-N-acetylglucosaminyltransferase inhibitor  
Antineoplastic (ovarian cancer)  
Arylacetonitrilase inhibitor  
Steroid synthesis inhibitor  
Pyruvate decarboxylase inhibitor  
N-acetylneuraminase 7-O(or 9-O)-acetyltransferase inhibitor  
GABA C receptor agonist  
Transcription factor STAT6 inhibitor  
Thrombolytic  
Biphenyl-2,3-diol 1,2-dioxygenase inhibitor  
Glutathione reductase inhibitor  
N-acylmannosamine kinase inhibitor  
3-Hydroxy-4-oxoquinoline 2,4-dioxygenase inhibitor  
MAP-kinase-activated kinase inhibitor  
Interleukin agonist  
Tauropine dehydrogenase inhibitor  
Antineoplastic (carcinoma)  
Antinephritic  
Corticosteroid side-chain-isomerase inhibitor  
Pancreatic elastase inhibitor  
Adrenergic, ophthalmic  
Long-chain-aldehyde dehydrogenase inhibitor  
CYP2B1 substrate  
Cyclooxygenase inhibitor  
Antiperistaltic  
Cyclomaltodextrinase inhibitor  
Methylamine-glutamate N-methyltransferase inhibitor  
Beta lactamase inhibitor  
Protein kinase C inhibitor  
Methylenetetrahydrofolate reductase (NADPH) inhibitor  
Cyclooxygenase substrate  
Laccase inhibitor  
2,5-Dihydroxypyridine 5,6-dioxygenase inhibitor  
Aromatase inhibitor  
Hyaluronic acid agonist  
L-idoitol 2-dehydrogenase inhibitor  
Antipyretic  
CYP19 substrate  
Glutathione dehydrogenase (ascorbate) inhibitor  
Glycolate dehydrogenase inhibitor  
N6-methyl-lysine oxidase inhibitor  
Beta tubulin antagonist  
(S)-6-hydroxynicotine oxidase inhibitor

MAO B inhibitor  
Aspergillus nuclease S1 inhibitor  
Shikimate O-hydroxycinnamoyltransferase inhibitor  
Antineoplastic (pancreatic cancer)  
Diiodophenylpyruvate reductase inhibitor  
Spermidine dehydrogenase inhibitor  
Antineoplastic (multiple myeloma)  
CYP2E1 inhibitor  
Cyclohexyl-isocyanide hydratase inhibitor  
4-Hydroxybenzoate decarboxylase inhibitor  
Apyrase inhibitor  
Anthelmintic (Fasciola)  
(S)-3-hydroxyacid ester dehydrogenase inhibitor  
Cl<sup>-</sup>-transporting ATPase inhibitor  
Cholesterol synthesis inhibitor  
Cytochrome-b5 reductase substrate  
CYP2B4 substrate  
Cytochrome P450 stimulant  
Gamma-glutamyltransferase inhibitor  
Dynamin GTPase inhibitor  
Uroporphyrinogen-III synthase inhibitor  
Endothelial growth factor antagonist  
Benzaldehyde dehydrogenase (NADP<sup>+</sup>) inhibitor  
S-alkylcysteine lyase inhibitor  
Gluconolactonase inhibitor  
HCV NS3-helicase inhibitor  
Mannitol-1-phosphatase inhibitor  
Huntington's disease treatment  
ADP-thymidine kinase inhibitor  
Naphthalene 1,2-dioxygenase inhibitor  
Ferredoxin-NAD<sup>+</sup> reductase inhibitor  
Bisphosphoglycerate phosphatase inhibitor  
Laminaribiose phosphorylase inhibitor  
Protein kinase C zeta inhibitor  
Phospholipase A2 inhibitor  
Antiinflammatory, intestinal  
N-formylmethionyl-peptidase inhibitor  
ATPase inhibitor  
Di-trans,poly-cis-decaprenylcistransferase inhibitor  
TRPA1 agonist  
Phosphatidylinositol diacylglycerol-lyase inhibitor  
(R)-Pantolactone dehydrogenase (flavin) inhibitor  
2-Hydroxy-3-oxoadipate synthase inhibitor  
Vitamin  
Uric acid excretion stimulant  
Sphinganine kinase inhibitor  
CYP3A3 substrate

Cytochrome-b5 reductase inhibitor  
Ca<sup>2+</sup>/calmodulin-dependent protein kinase inhibitor  
Antineoplastic (glioblastoma multiforme)  
Crotonoyl-[acyl-carrier-protein] hydratase inhibitor  
N-Acyl-D-aspartate deacylase inhibitor  
Immunosuppressant  
N-hydroxy-2-acetamidofluorene reductase inhibitor  
Interleukin 6 antagonist  
Squalene epoxidase inhibitor  
Glycerol-1-phosphatase inhibitor  
H<sup>+</sup>-exporting ATPase inhibitor  
Oligo-1,6-glucosidase inhibitor  
Aldehyde dehydrogenase 2 substrate  
2,3,4,5-Tetrahydropyridine-2,6-dicarboxylate N-succinyltransferase inhibitor  
Antineoplastic (renal cancer)  
UGT1A5 substrate  
Membrane permeability enhancer  
Paraoxonase substrate  
Dementia treatment  
Anthranilate 3-monooxygenase (deaminating) inhibitor  
Alkene monooxygenase inhibitor  
Alcohol dehydrogenase (acceptor) inhibitor  
Monodehydroascorbate reductase (NADH) inhibitor  
Blasticidin-S deaminase inhibitor  
Neuropeptide Y4 antagonist  
Phospholipase C inhibitor  
Indoleamine-pyrrole 2,3-dioxygenase inhibitor  
Thioredoxin reductase inhibitor  
Antineoplastic antibiotic  
Antineoplastic (uterine cancer)  
Isoquinoline 1-oxidoreductase inhibitor  
Skeletal muscle relaxant  
Peptide-N4-(N-acetyl-beta-glucosaminy)asparagine amidase inhibitor  
Styrene-oxide isomerase inhibitor  
Fragilysin inhibitor  
3-Hydroxyphenylacetate 6-hydroxylase inhibitor  
Phosphorylase kinase inhibitor  
CYP1A3 substrate  
Cyanoalanine nitrilase inhibitor  
Cytokine release inhibitor  
Sulfite reductase inhibitor  
4-Phytase inhibitor  
CDC25A inhibitor  
Sclerosant  
Cyclooxygenase 1 inhibitor  
Isopenicillin-N epimerase inhibitor  
CYP4A substrate

Adenylyl-sulfate reductase inhibitor  
CYP2C9 inhibitor  
CYP4A11 substrate  
Amine dehydrogenase inhibitor  
Histidine N-acetyltransferase inhibitor  
Endo-1,3(4)-beta-glucanase inhibitor  
Heat shock protein 90 antagonist  
HIV-1 integrase (Overall Integration) inhibitor  
2-Haloacid dehalogenase inhibitor  
Sedoheptulose-bisphosphatase inhibitor  
Trans-pentaprenyltranstransferase inhibitor  
Dimethylmaleate hydratase inhibitor  
Vasodilator, peripheral  
CYP4F2 substrate  
Fibrolase inhibitor  
Antineoplastic (bladder cancer)  
L-amino-acid oxidase inhibitor  
Estradiol 17alpha-dehydrogenase inhibitor  
Horrilysin inhibitor  
Homogentisate 1,2-dioxygenase inhibitor  
6-Methylsalicylate decarboxylase inhibitor  
Cyclic AMP phosphodiesterase inhibitor  
Phosphatidylserine decarboxylase inhibitor  
Protein kinase C eta inhibitor  
Histone deacetylase class III inhibitor  
Cerebroside-sulfatase inhibitor  
Dry eye syndrome treatment  
Cyclooxygenase 2 inhibitor  
Leucine dehydrogenase inhibitor  
Antidiabetic (type 1)  
Arylsulfatase inhibitor  
Acyl-CoA oxidase inhibitor  
NOS3 expression enhancer  
CYP2B18 substrate  
Phospholipase inhibitor  
MAP-kinase-activated kinase 1 inhibitor  
Levanase inhibitor  
UGT2B10 substrate  
Poly(beta-D-mannuronate) lyase inhibitor  
ATP phosphoribosyltransferase inhibitor  
Venom exonuclease inhibitor  
Pullulanase inhibitor  
Antiprotozoal (Trichomonas)  
Protocatechuate 3,4-dioxygenase inhibitor  
Nicotinate dehydrogenase inhibitor  
Antitoxic  
Bacterial efflux pump inhibitor



Azobenzene reductase inhibitor  
Catalase stimulant  
Tumour necrosis factor antagonist  
Inotropic  
Histone acetyltransferase inhibitor  
Aminomuconate-semialdehyde dehydrogenase inhibitor  
Protein kinase C mu inhibitor  
Myc inhibitor  
Phobic disorders treatment  
Pyruvate dehydrogenase (lipoamide) inhibitor  
Lactose synthase inhibitor  
Catechol O methyltransferase inhibitor  
D-alanine 2-hydroxymethyltransferase inhibitor  
Antiprotozoal (Coccidial)  
4,5-Dihydroxyphthalate decarboxylase inhibitor  
Trans-2-enoyl-CoA reductase (NAD+) inhibitor  
Pyruvate dehydrogenase (cytochrome) inhibitor  
Polyporopepsin inhibitor  
Cancer associated disorders treatment  
Antineoplastic (non-small cell lung cancer)  
Thiopurine S-methyltransferase inhibitor  
Aspartate-ammonia ligase inhibitor  
[acyl-carrier-protein] S-acetyltransferase inhibitor  
Protein-glucosylgalactosylhydroxylysine glucosidase inhibitor  
Ribonucleoside triphosphate reductase inhibitor  
Glycogen synthase kinase-3 alpha inhibitor  
Aryl sulfotransferase inhibitor  
Meprin B inhibitor  
Antimyopathies  
Glutarate-semialdehyde dehydrogenase inhibitor  
O-aminophenol oxidase inhibitor  
Bilirubin oxidase inhibitor  
Pyruvate dehydrogenase inhibitor  
Hippurate hydrolase inhibitor  
Muscular dystrophy treatment  
Tumour necrosis factor alpha antagonist  
Glutamate decarboxylase inhibitor  
Macrophage migration inhibitory factor inhibitor  
15-Hydroxyprostaglandin-D dehydrogenase (NADP+) inhibitor  
Coagulant  
Bothrolysin inhibitor  
Bcl2 antagonist  
D-threo-aldose 1-dehydrogenase inhibitor  
2,4-Dichlorophenol 6-monooxygenase inhibitor  
Acetylcysteine inhibitor  
Ubiquitin thiolesterase inhibitor  
CYP2C18 substrate

4-Hydroxybenzoate-CoA ligase inhibitor  
Nitrate reductase inhibitor  
Gamma-butyrobetaine dioxygenase inhibitor  
Acylphosphatase inhibitor  
Radical formation agonist  
Antipruritic, non-allergic  
Methane monooxygenase inhibitor  
Creatininase inhibitor  
Stipitatonate decarboxylase inhibitor  
Anthranilate-CoA ligase inhibitor  
Nicotinic alpha2beta2 receptor antagonist  
Bone formation stimulant  
5 Hydroxytryptamine 2B agonist  
Alpha-N-acetylglucosaminidase inhibitor  
Phosphoinositide 5-phosphatase inhibitor  
Lipoxygenase substrate  
Imidazoleacetate 4-monooxygenase inhibitor  
Adrenaline release stimulant  
Riboflavin phosphotransferase inhibitor  
3-Oxosteroid 1-dehydrogenase inhibitor  
Neuraminidase inhibitor  
Aryl hydrocarbon receptor antagonist  
2-Hydroxymuconate-semialdehyde hydrolase inhibitor  
Corticosteroid antagonist  
Phosphatidylglycerol-membrane-oligosaccharide glycerophosphotransferase inhibitor  
Muscle relaxant  
Glucan 1,4-beta-glucosidase inhibitor  
L-iduronidase inhibitor  
N-acetyl-gamma-glutamyl-phosphate reductase inhibitor  
Pantoate 4-dehydrogenase inhibitor  
Phosphatidylinositol kinase inhibitor  
3-Hydroxybutyryl-CoA dehydrogenase inhibitor  
2,4-Diaminopentanoate dehydrogenase inhibitor  
Lysine 6-dehydrogenase inhibitor  
All-trans-retinyl-palmitate hydrolase inhibitor  
Polyneuridine-aldehyde esterase inhibitor  
N-benzyloxycarbonylglycine hydrolase inhibitor  
3-Oxoadipate enol-lactonase inhibitor  
Pappalysin-1 inhibitor  
Gestagen antagonist  
D-xylulose reductase inhibitor  
Tannase inhibitor  
CD45 antagonist  
Antibiotic  
tRNA nucleotidyltransferase inhibitor  
Simian immunodeficiency virus proteinase inhibitor  
Penicillin amidase inhibitor

Serum-glucocorticoid regulated kinase inhibitor  
Arachidonic acid antagonist  
Phosphatidylinositol 3-kinase inhibitor  
Iron antagonist  
UGT2B11 substrate  
Licheninase inhibitor  
Alpha-glucuronidase inhibitor  
Glycine dehydrogenase (decarboxylating) inhibitor  
Biotin-CoA ligase inhibitor  
Homoaconitate hydratase inhibitor  
Triacetate-lactonase inhibitor  
6-Carboxyhexanoate-CoA ligase inhibitor  
Sulfite dehydrogenase inhibitor  
Contraceptive female  
Hydroxyquinol 1,2-dioxygenase inhibitor  
Transketolase inhibitor  
Alcohol oxidase inhibitor  
2-Nitrophenol 2-monooxygenase inhibitor  
Spasmolytic, urinary  
Methanol dehydrogenase inhibitor  
Isocitrate dehydrogenase (NAD+) inhibitor  
CDC25 phosphatase inhibitor  
Protein kinase C beta inhibitor  
Interleukin 12 agonist  
Acetylserotonin O-methyltransferase inhibitor  
Adenylate cyclase stimulant  
Polygalacturonase inhibitor  
Dopamine release stimulant  
Vanillyl-alcohol oxidase inhibitor  
Phosphoenolpyruvate-protein phosphotransferase inhibitor  
Succinic dehydrogenase inhibitor  
Mannose-6-phosphate isomerase inhibitor  
Interleukin 10 antagonist  
Phosphogluconate dehydrogenase (decarboxylating) inhibitor  
Anticataract  
Phosphatidylinositol 3-kinase alpha inhibitor  
NAD+ synthase (glutamine-hydrolysing) inhibitor  
FMO3 substrate  
Fucosterol-epoxide lyase inhibitor  
Bisphosphoglycerate mutase inhibitor  
Antineoplastic enhancer  
Orotate reductase (NADPH) inhibitor  
Protein kinase C nu inhibitor  
Xylan endo-1,3-beta-xylosidase inhibitor  
Antimitotic  
Aryldialkylphosphatase inhibitor  
4-Hydroxybenzoate 3-monooxygenase inhibitor

Protein synthesis stimulant  
Aureolysin inhibitor  
UGT2B4D substrate  
UGT2B30 substrate  
UGT2B19 substrate  
UGT2B23 substrate  
UGT2B4E substrate  
Lombricine kinase inhibitor  
3-Hydroxybenzoate 4-monooxygenase inhibitor  
Aspartate-tRNA ligase inhibitor  
Quinate 5-dehydrogenase inhibitor  
UGT2B7H substrate  
UGT2B7Y substrate  
Tryptophan alpha,beta-oxidase inhibitor  
Gamma-D-Glutamyl-meso-diaminopimelate peptidase inhibitor  
3-Carboxyethylcatechol 2,3-dioxygenase inhibitor  
3-Aminobutyryl-CoA ammonia-lyase inhibitor  
Galacturan 1,4-alpha-galacturonidase inhibitor  
6,7-Dihydropteridine reductase inhibitor  
Tropinesterase inhibitor  
Undecaprenyl-diphosphatase inhibitor  
Creatinine deaminase inhibitor  
Hydroxylamine reductase inhibitor  
Antiprotozoal (Amoeba)  
Acetylenecarboxylate hydratase inhibitor  
Prostaglandin-E2 9-reductase inhibitor  
Antinociceptive  
PRL phosphatase inhibitor  
N-acetylneuraminate synthase inhibitor  
Heat shock protein 70 antagonist  
Opioid dependency treatment  
Mitochondrial processing peptidase inhibitor  
Aldehyde dehydrogenase (pyrroloquinoline-quinone) inhibitor  
Nucleoside oxidase (H2O2-forming) inhibitor  
3-Ketoalidoxylamine C-N-lyase inhibitor  
N-acetyllactosamine synthase inhibitor  
Succinate dehydrogenase inhibitor  
Cysteine-S-conjugate beta-lyase inhibitor  
6-Pyruvoyltetrahydropterin synthase inhibitor  
CYP2A5 inhibitor  
Cyclohexanone monooxygenase inhibitor  
Diuretic  
Poly(ADP-ribose) glycohydrolase inhibitor  
L-ascorbate peroxidase inhibitor  
CYP3A5 inducer  
Histone deacetylase SIRT2 inhibitor  
Camphor 1,2-monooxygenase inhibitor

D-arabinonolactone oxidase inhibitor  
Dihydroxyacetanilide epoxidase inhibitor  
Dihydroxyacetanilide dehydrogenase inhibitor  
Antidote, heavy metal  
CDC25B inhibitor  
D-lactaldehyde dehydrogenase inhibitor  
Pyridoxine 5-dehydrogenase inhibitor  
Ornithine cyclodeaminase inhibitor  
Alpha-1,6-mannosyl-glycoprotein 4-beta-N-acetylglucosaminyltransferase inhibitor  
1,4-Alpha-glucan branching enzyme inhibitor  
Rhamnulose-1-phosphate aldolase inhibitor  
N-acetyllactosaminide beta-1,3-N-acetylglucosaminyltransferase inhibitor  
4-Hydroxyglutamate transaminase inhibitor  
Beta-cyclopiazotate dehydrogenase inhibitor  
Cyclic AMP agonist  
T cell inhibitor  
Antineoplastic (gastric cancer)  
Antipsoriatic  
Thiamine pyridinylase inhibitor  
CYP11B1 inhibitor  
2-Amino adipate transaminase inhibitor  
Acyl-lysine deacylase inhibitor  
Cyclin-dependent kinase 1 inhibitor  
Snapalysin inhibitor  
Tyrosine 2,3-aminomutase inhibitor  
Cutinase inhibitor  
Contraceptive  
Anabolic  
4-Hydroxyproline epimerase inhibitor  
Allantoinase inhibitor  
Benzoate 4-monooxygenase inhibitor  
3-Phosphoshikimate 1-carboxyvinyltransferase inhibitor  
Multidrug resistance-associated protein inhibitor  
Arylesterase inhibitor  
Aldehyde dehydrogenase 1A2 inhibitor  
Urolithiasis treatment  
Haloacetate dehalogenase inhibitor  
Prepilin peptidase inhibitor  
Peptidylamidoglycolate lyase inhibitor  
Glutamate-tRNA ligase inhibitor  
Aromatic-hydroxylamine O-acetyltransferase inhibitor  
2-Oxoglutarate decarboxylase inhibitor  
Ligase inhibitor  
Glutamate (mGluR5) agonist  
Prolactin inhibitor  
Alkylglycerophosphoethanolamine phosphodiesterase inhibitor  
Urease inhibitor

Polarisation inhibitor  
Allantoate deiminase inhibitor  
Protein kinase C delta inhibitor  
Multidrug resistance-associated protein 1 inhibitor  
Histidinol-phosphatase inhibitor  
Alpha-pinene-oxide decyclase inhibitor  
CDP-diacylglycerol-inositol 3-phosphatidyltransferase inhibitor  
Glucan 1,6-alpha-glucosidase inhibitor  
Transcription factor stimulant  
Transcription factor NF kappa B stimulant  
CDP-4-dehydro-6-deoxyglucose reductase inhibitor  
Ferredoxin-NADP+ reductase inhibitor  
Yeast ribonuclease inhibitor  
Guanidinoacetase inhibitor  
Mannan endo-1,6-alpha-mannosidase inhibitor  
Glucan endo-1,3-alpha-glucosidase inhibitor  
Carboxymethylenebutenolidase inhibitor  
Sorbose dehydrogenase inhibitor  
Dynein ATPase inhibitor  
Antibiotic Anthracycline-like  
L-glucuronate reductase inhibitor  
Estrogen-related receptor alpha antagonist  
Guanidinodeoxy-scylo-inositol-4-phosphatase inhibitor  
Sphingosine kinase inhibitor  
Hot flush treatment  
Ferredoxin-nitrite reductase inhibitor  
MAP-kinase-activated kinase 2 inhibitor  
N-(5-amino-5-carboxypentanoyl)-L-cysteinyl-D-valine synthase inhibitor  
Expectorant  
Na+-transporting two-sector ATPase inhibitor  
CYP2D2 inhibitor  
Ethanolamine-phosphate cytidyltransferase inhibitor  
CYP26A substrate  
N-acetylneuraminase 4-O-acetyltransferase inhibitor  
Aldose 1-epimerase inhibitor  
Coccolysin inhibitor  
DNA-3-methyladenine glycosylase I inhibitor  
Glutamin-(asparagin-)ase inhibitor  
Inulinase inhibitor  
Dipeptidase E inhibitor  
Flavin-containing monooxygenase substrate  
Thiamine-triphosphatase inhibitor  
Dopachrome isomerase inhibitor  
L-threonine 3-dehydrogenase inhibitor  
3(or 17)alpha-hydroxysteroid dehydrogenase inhibitor  
Insecticide  
Glucarate dehydratase inhibitor

N-methyl-2-oxoglutaramate hydrolase inhibitor  
(R)-limonene 6-monooxygenase inhibitor  
Bile-salt sulfotransferase inhibitor  
Myeloblastin inhibitor  
Pseudouridylate synthase inhibitor  
Uterine relaxant  
Prolyl endopeptidase inhibitor  
Galactokinase inhibitor  
NMDA receptor glycine site B antagonist  
Nicotinic alpha4beta4 receptor agonist  
RNA-directed RNA polymerase inhibitor  
Sphinganine-1-phosphate aldolase inhibitor  
Taurine-2-oxoglutarate transaminase inhibitor  
Allophanate hydrolase inhibitor  
Aminocarboxymuconate-semialdehyde decarboxylase inhibitor  
c-Src kinase inhibitor  
3'-Nucleotidase inhibitor  
Narcotic antagonist  
Choloylglycine hydrolase inhibitor  
D-lactate dehydrogenase inhibitor  
Pyridoxine 4-oxidase inhibitor  
Acute neurologic disorders treatment  
Inorganic diphosphatase inhibitor  
Glycogen (starch) synthase inhibitor  
Beta amyloid protein antagonist  
Secretase beta 1 inhibitor  
Tryptophan dimethylallyltransferase inhibitor  
3,4-Dihydroxyphenylacetate 2,3-dioxygenase inhibitor  
Alpha-N-arabinofuranosidase inhibitor  
Malonate-semialdehyde dehydrogenase inhibitor  
Prephenate dehydrogenase inhibitor  
Farnesyltranstransferase inhibitor  
DNA-3-methyladenine glycosylase II inhibitor  
Phosphatidylinositol 3-kinase gamma inhibitor  
Opine dehydrogenase inhibitor  
CYP4A2 substrate  
Antirickettsial  
Endo-1,4-beta-xylanase inhibitor  
SULT1A2 substrate  
Thiol oxidase inhibitor  
Catechol oxidase inhibitor  
Opioid mu 2 receptor antagonist  
Transthyretin amyloid fibril formation inhibitor  
(R,R)-butanediol dehydrogenase inhibitor  
2-Oxoisovalerate dehydrogenase (acylating) inhibitor  
Lipoprotein lipase stimulant  
Diisopropyl-fluorophosphatase inhibitor

Xylose isomerase inhibitor  
(S)-3-amino-2-methylpropionate transaminase inhibitor  
Shikimate kinase inhibitor  
Homocysteine desulfhydrase inhibitor  
Glycerol dehydratase inhibitor  
Protein kinase C epsilon inhibitor  
GST M1-1 substrate  
Oryzin inhibitor  
Potassium channel (Ca-activated) activator  
Lipase inhibitor  
CDC25C inhibitor  
Orcinol 2-monooxygenase inhibitor  
Fructuronate reductase inhibitor  
Tagaturonate reductase inhibitor  
CYP2D1 substrate  
DNA intercalator  
Antisecretoric  
Peptidyl-dipeptidase B inhibitor  
Cellulose 1,4-beta-cellobiosidase inhibitor  
Alpha 3 adrenoreceptor agonist  
Mucolytic  
Glycoprotein-fucosylgalactoside alpha-N-acetylgalactosaminyltransferase inhibitor  
(S)-2-hydroxy-acid oxidase inhibitor  
LDLR expression enhancer  
Quisqualate antagonist  
Deoxyribose-phosphate aldolase inhibitor  
Antineoplastic (solid tumors)  
Polyribonucleotide nucleotidyltransferase inhibitor  
Ornithine decarboxylase inhibitor  
Aspartyl aminopeptidase inhibitor  
DNA-(apurinic or apyrimidinic site) lyase inhibitor  
Diiodotyrosine transaminase inhibitor  
Cyclamate sulfohydrolase inhibitor  
Acetate kinase inhibitor  
Methylaspartate ammonia-lyase inhibitor  
4-Hydroxyphenylacetate 1-monooxygenase inhibitor  
Indolepyruvate C-methyltransferase inhibitor  
Steroid sulfotransferase inhibitor  
2-Hydroxy-3-oxopropionate reductase inhibitor  
Galactosylceramide sulfotransferase inhibitor  
GABA B receptor agonist  
Gynecological disorders treatment  
Aldosterone antagonist  
Glycerophosphocholine cholinephosphodiesterase inhibitor  
Asparagine-tRNA ligase inhibitor  
Methylumbelliferyl-acetate deacetylase inhibitor  
Fructose-2,6-bisphosphate 6-phosphatase inhibitor



4-Chlorophenylacetate 3,4-dioxygenase inhibitor  
Acetoacetate decarboxylase inhibitor  
ADP-ribosylarginine hydrolase inhibitor  
Secretase beta inhibitor  
Adenomatous polyposis treatment  
Acetylnithine deacetylase inhibitor  
Alkylglycerone-phosphate synthase inhibitor  
4-Hydroxybenzoate 1-hydroxylase inhibitor  
Tyrosine phenol-lyase inhibitor  
Glutamate-1-semialdehyde 2,1-aminomutase inhibitor  
2-Dehydropantoate aldolase inhibitor  
Hypolipemic  
CYP4F substrate  
Poly(alpha-L-gulonate) lyase inhibitor  
Histone deacetylase SIRT1 inhibitor  
Bcl-xL inhibitor  
Phenylalanine(histidine) transaminase inhibitor  
Sulfate adenylyltransferase (ADP) inhibitor  
Agmatinase inhibitor  
Transcription factor AP-1 inhibitor  
Selenocysteine lyase inhibitor  
Iron-cytochrome-c reductase inhibitor  
SULT2A1 substrate  
Loop diuretic  
Lactate 2-monooxygenase inhibitor  
3-Chloro-D-alanine dehydrochlorinase inhibitor  
Thiosulfate dehydrogenase inhibitor  
Deoxyribonuclease (pyrimidine dimer) inhibitor  
3-Hydroxyacyl-CoA dehydrogenase inhibitor  
Bronchodilator  
Purinergic P2X4 antagonist  
NMDA receptor polyamine site antagonist  
Serratia marcescens nuclease inhibitor  
Alpha,alpha-phosphotrehalase inhibitor  
Fibrosis treatment  
Benzoylformate decarboxylase inhibitor  
DNA repair enzyme inhibitor  
Chelator, Iron  
Opioid delta 1 receptor antagonist  
Polynucleotide adenylyltransferase inhibitor  
Nootropic  
Trehalose-phosphatase inhibitor  
Antiviral (Hepatitis)  
Glycine C-acetyltransferase inhibitor  
BRAF expression inhibitor  
Glycine amidinotransferase inhibitor  
Orsellinate decarboxylase inhibitor

Beta 1 adrenoreceptor agonist  
Aconitate decarboxylase inhibitor  
Phosphatidylglycerophosphatase inhibitor  
FtsZ polymerization inhibitor  
Dolichyl-phosphatase inhibitor  
Mycodextranase inhibitor  
Urate-ribonucleotide phosphorylase inhibitor  
HIV-1 reverse transcriptase inhibitor  
Leukotriene C antagonist  
Thiamine-phosphate kinase inhibitor  
Chelator  
Oxalate oxidase inhibitor  
Microtubule formation inhibitor  
Albendazole monooxygenase inhibitor  
Beta-alanine-pyruvate transaminase inhibitor  
Galactose 1-dehydrogenase (NADP+) inhibitor  
Phosphomevalonate kinase inhibitor  
Heme oxygenase inhibitor  
D-cysteine desulfhydrase inhibitor  
Glucuronolactone reductase inhibitor  
Steroid DELTA-isomerase inhibitor  
Epidermal growth factor receptor kinase inhibitor  
IgA-specific serine endopeptidase inhibitor  
Deoxycytidine deaminase inhibitor  
Biotinidase inhibitor  
4-Pyridoxolactonase inhibitor  
Geranylgeranyl-diphosphate geranylgeranyltransferase inhibitor  
Cellulase inhibitor  
Carnitine dehydratase inhibitor  
Protein kinase C gamma inhibitor  
Alanine-tRNA ligase inhibitor  
Chaperonin ATPase inhibitor  
4-Alpha-glucanotransferase inhibitor  
FMN reductase inhibitor  
Opioid delta 2 receptor antagonist  
Chondroitin 6-sulfotransferase inhibitor  
Inositol oxygenase inhibitor  
Indoleacetaldoxime dehydratase inhibitor  
2-Haloacid dehalogenase (configuration-inverting) inhibitor  
Tyrosine-ester sulfotransferase inhibitor  
4-Hydroxybenzoate 3-monooxygenase [NAD(P)H] inhibitor  
Inositol-3-phosphate synthase inhibitor  
Opioid mu 1 receptor antagonist  
Glucosamine-1-phosphate N-acetyltransferase inhibitor  
CYP2A8 substrate  
Isopenicillin-N synthase inhibitor  
Glutamate (mGluR1) agonist

4-Hydroxyphenylpyruvate dioxygenase inhibitor  
Poly(3-hydroxybutyrate) depolymerase inhibitor  
Aldehyde dehydrogenase [NAD(P)+] inhibitor  
Dichloromuconate cycloisomerase inhibitor  
Adenosine deaminase inhibitor  
2-Dehydro-3-deoxy-L-arabinonate dehydratase inhibitor  
Leucine transaminase inhibitor  
Gluconate dehydratase inhibitor  
Aerobactin synthase inhibitor  
Isomaltulose synthase inhibitor  
Renilla-luciferin 2-monooxygenase inhibitor  
Antihypotensive  
Protein kinase C beta I inhibitor  
CYP3A11 substrate  
Retinal dehydrogenase inhibitor  
Oxytocin agonist  
Aspartate racemase inhibitor  
Glucosamine-6-phosphate deaminase inhibitor  
Erectile dysfunction treatment  
CYP4B1 substrate  
D-2-hydroxy-acid dehydrogenase inhibitor  
Cholestenone 5alpha-reductase inhibitor  
L-lysine 6-transaminase inhibitor  
Interferon gamma antagonist  
Oxytocic  
Phosphogluconate 2-dehydrogenase inhibitor  
Glyceraldehyde-3-phosphate dehydrogenase inhibitor  
N-Acyl-D-amino-acid deacylase inhibitor  
High-mannose-oligosaccharide beta-1,4-N-acetylglucosaminyltransferase inhibitor  
CYP4B substrate  
Gly-X carboxypeptidase inhibitor  
Interferon antagonist  
Antitreponemal  
Fructose-2,6-bisphosphate 2-phosphatase inhibitor  
Osmotic diuretic  
Pyridoxamine-phosphate oxidase inhibitor  
Pro-opiomelanocortin converting enzyme inhibitor  
Hepatocyte nuclear factor antagonist  
Hepatocyte nuclear factor 4 alpha antagonist  
3(or 17)beta-hydroxysteroid dehydrogenase inhibitor  
Allyl-alcohol dehydrogenase inhibitor  
Gluconokinase inhibitor  
CYP26 substrate  
Phenylacetate-CoA ligase inhibitor  
Acaricide  
Botulin neurotoxin A light chain inhibitor  
Prolyl aminopeptidase inhibitor

Pim-2 kinase inhibitor  
Ketohehexokinase inhibitor  
Adenylylsulphatase inhibitor  
Polar-amino-acid-transporting ATPase inhibitor  
Galactose oxidase inhibitor  
NAD(P)H dehydrogenase (quinone) 1 inhibitor  
Carnosine synthase inhibitor  
Anhydrotetracycline monooxygenase inhibitor  
Mandelate racemase inhibitor  
Pantothenase inhibitor  
Antimitotic, Podophyllotoxin-like  
Agaritine gamma-glutamyltransferase inhibitor  
1,5-Anhydro-D-fructose reductase inhibitor  
NADH dehydrogenase inhibitor  
Phosphatidylinositol 3-kinase beta inhibitor  
2-Methylcitrate dehydratase inhibitor  
Acetolactate decarboxylase inhibitor  
Tryptophanamidase inhibitor  
Phosphoglycerate mutase inhibitor  
Cyclopentanone monooxygenase inhibitor  
Acidifying agent non gastric  
Nuclease inhibitor  
Androgen antagonist  
Protein kinase C alpha inhibitor  
Saccharopine dehydrogenase (NAD+, L-glutamate-forming) inhibitor  
Phosphatidylinositol 3-kinase delta inhibitor  
UDP-glucose 4-epimerase inhibitor  
UDP-N-acetylglucosamine diphosphorylase inhibitor  
Protocatechuate 4,5-dioxygenase inhibitor  
Retinol O-fatty-acyltransferase inhibitor  
Carnitinamidase inhibitor  
Selectin L antagonist  
Pyrimidine-deoxynucleoside 2'-dioxygenase inhibitor  
Cellobiose phosphorylase inhibitor  
3-Alpha-hydroxysteroid dehydrogenase (B-specific) inhibitor  
Phenylalanine 4-hydroxylase inhibitor  
Adenylyl-sulfate kinase inhibitor  
Muconate cycloisomerase inhibitor  
Trimethyllysine dioxygenase inhibitor  
3-Oxoacyl-[acyl-carrier-protein] synthase III inhibitor  
MDM2 inhibitor  
CYP2C2 substrate  
L-fuconate dehydratase inhibitor  
NAD(P)+ transhydrogenase (B-specific) inhibitor  
Glycopeptide alpha-N-acetylgalactosaminidase inhibitor  
Endopeptidase So inhibitor  
Pectin lyase inhibitor

Aldehyde dehydrogenase 3 substrate  
Cysteine desulfurase inhibitor  
Aldehyde ferredoxin oxidoreductase inhibitor  
DNA gyrase inhibitor  
Secretase alpha stimulant  
Secretase stimulant  
Phosphoinositide phospholipase C inhibitor  
Dactylisin inhibitor  
Arabinogalactan endo-1,4-beta-galactosidase inhibitor  
ATP adenyltransferase inhibitor  
Urethanase inhibitor  
Haloalkane dehalogenase inhibitor  
Ethanolaminephosphotransferase inhibitor  
Valine decarboxylase inhibitor  
Lactaldehyde reductase (NADPH) inhibitor  
Epoxide hydrolase substrate  
Leukotriene antagonist  
Aspartoacylase inhibitor  
Leukopoiesis inhibitor  
Glyceraldehyde-3-phosphate dehydrogenase (NADP+) inhibitor  
Alpha,alpha-trehalase inhibitor  
MAP kinase kinase 7 inhibitor  
(S)-2-Methylmalate dehydratase inhibitor  
Rhizopuspepsin inhibitor  
L-galactonolactone oxidase inhibitor  
Valine dehydrogenase (NADP+) inhibitor  
3-Deoxy-8-phosphooctulonate synthase inhibitor  
Tubulin-tyrosine ligase inhibitor  
Glutathione S-transferase inhibitor  
Pyruvate carboxylase inhibitor  
2,2-Dialkylglycine decarboxylase (pyruvate) inhibitor  
Metallocoarboxypeptidase D inhibitor  
Ca<sup>2+</sup>-transporting ATPase inhibitor  
CYP24 inhibitor  
Keratosis actinic (solar) treatment  
Cyclohexadienyl dehydrogenase inhibitor  
Alpha-N-acetylgalactosaminidase inhibitor  
Mevalonate kinase inhibitor  
Gallate decarboxylase inhibitor  
Aspartate kinase inhibitor  
Tyrosine transaminase inhibitor  
Isovaleryl-CoA dehydrogenase inhibitor  
(S)-carnitine 3-dehydrogenase inhibitor  
Glucan 1,3-beta-glucosidase inhibitor  
D-lactate dehydrogenase (cytochrome) inhibitor  
3C-like protease (Human coronavirus) inhibitor  
Ryanodine receptor 1 antagonist

Ryanodine receptor antagonist  
Smooth muscle myosin light chain kinase inhibitor  
Magnesium-protoporphyrin IX methyltransferase inhibitor  
Isoamylase inhibitor  
Aspartate-ammonia ligase (ADP-forming) inhibitor  
2-Dehydro-3-deoxy-phosphogluconate aldolase inhibitor  
Lactate-malate transhydrogenase inhibitor  
Serine-pyruvate transaminase inhibitor  
3-Dehydroquinate dehydratase inhibitor  
Cyclopropane-fatty-acyl-phospholipid synthase inhibitor  
Polynucleotide 5'-hydroxy-kinase inhibitor  
Arginine decarboxylase inhibitor  
Glyoxylate reductase (NADP+) inhibitor  
VCAM1 expression inhibitor  
Beta-amylase inhibitor  
Dual specificity protein phosphatase VHR inhibitor  
Insulin sensitizer  
N-acetylglucosaminyldiphosphoundecaprenol N-acetyl-beta-D-mannosaminyltransferase inhibitor  
DNA synthesis inhibitor  
5 Hydroxytryptamine 2A agonist  
Lactaldehyde dehydrogenase inhibitor  
Glycolaldehyde dehydrogenase inhibitor  
Thiamine-phosphate diphosphorylase inhibitor  
2-Methylcitrate synthase inhibitor  
3-Hydroxyanthranilate 3,4-dioxygenase inhibitor  
Opioid kappa 1 receptor antagonist  
Vitamin K-like  
Subtilisin inhibitor  
Glutamate (mGluR6) agonist  
CYP17 substrate  
N-carbamoyl-L-amino-acid hydrolase inhibitor  
2-Methyleneglutarate mutase inhibitor  
ATP deaminase inhibitor  
Phosphonoacetate hydrolase inhibitor  
Dihydroorotate oxidase inhibitor  
Glutathione peroxidase inhibitor  
Pyridoxal kinase inhibitor  
IgA-specific metalloendopeptidase inhibitor  
Chloramphenicol O-acetyltransferase inhibitor  
Nucleoside transporters inhibitor  
UDP-glucose-hexose-1-phosphate uridylyltransferase inhibitor  
Aromatic-amino-acid transaminase inhibitor  
GST T substrate  
GST T1-1 substrate  
Androst-4-ene-3,17-dione monooxygenase inhibitor  
Gentamicin 2''-nucleotidyltransferase inhibitor  
Catechol 2,3-dioxygenase inhibitor

Cysteine transaminase inhibitor  
Oxaloacetate decarboxylase inhibitor  
Deoxyribonuclease X inhibitor  
Amylosucrase inhibitor  
Electron transport complex I inhibitor  
N-(long-chain-acyl)ethanolamine deacylase inhibitor  
Phenylpyruvate tautomerase inhibitor  
Chorismate mutase inhibitor  
Inositol 1,4,5-triphosphate receptor antagonist  
Protein-tyrosine sulfotransferase inhibitor  
Atrolysin A inhibitor  
Glycogen synthase kinase-3 beta inhibitor  
Glutamate 5-kinase inhibitor  
Alpha,alpha-trehalose phosphorylase inhibitor  
Choline dehydrogenase inhibitor  
Thiol protease inhibitor  
Scyllo-inosamine-4-phosphate amidinotransferase inhibitor  
Pyroglutamyl-peptidase II inhibitor  
N-acetylneuraminase lyase inhibitor  
DNA helicase inhibitor  
Monocarboxylic acid transporter inhibitor  
Monocarboxylic acid transporter 1 inhibitor  
Plasmanylethanolamine desaturase inhibitor  
Carboxypeptidase D inhibitor  
Gingipain K inhibitor  
17-Beta-hydroxysteroid dehydrogenase 1 inhibitor  
Hydroxymethylbilane synthase inhibitor  
Antibiotic Tetracycline-like  
Sucrose-phosphate phosphatase inhibitor  
4-Carboxymethyl-4-methylbutenolide mutase inhibitor  
UDP-N-acetylmuramoylalanine-D-glutamate ligase inhibitor  
Biotin carboxylase inhibitor  
UDP-N-acetylglucosamine-dolichyl-phosphate N-acetylglucosaminophosphotransferase inhibitor  
Catalase inhibitor  
Arylamine N-Acetyltransferase substrate  
[myelin basic protein]-arginine N-methyltransferase inhibitor  
Ribitol 2-dehydrogenase inhibitor  
Erythro-3-hydroxyaspartate ammonia-lyase inhibitor  
Glutamate synthase (ferredoxin) inhibitor  
Glycoprotein 3-alpha-L-fucosyltransferase inhibitor  
DELTA14-sterol reductase inhibitor  
Mannonate dehydratase inhibitor  
Serine 3-dehydrogenase inhibitor  
Acylglycerone-phosphate reductase inhibitor  
Site-specific DNA-methyltransferase (adenine-specific) inhibitor  
Src kinase inhibitor  
Octadecanal decarbonylase inhibitor

Postcoital contraceptive  
Leukotriene B4 antagonist

itor

bitor



or

or

or  
inhibitor  
inhibitor

tor  
ating) inhibitor

or

g) inhibitor

or



d activator  
e inhibitor

| Gallic Acid |       |                                                          | Syringic Acid |       |
|-------------|-------|----------------------------------------------------------|---------------|-------|
| Pa          | Pi    | Activity                                                 | Pa            | Pi    |
| 0,955       | 0,002 | Arylacetonitrilase inhibitor                             | 0,949         | 0,002 |
| 0,954       | 0,002 | Chlordecone reductase inhibitor                          | 0,929         | 0,004 |
| 0,950       | 0,002 | Dehydro-L-gulonate decarboxylase inhibitor               | 0,925         | 0,004 |
| 0,950       | 0,003 | Testosterone 17beta-dehydrogenase (NADP+) inhibitor      | 0,910         | 0,002 |
| 0,944       | 0,002 | Glutathione thiolesterase inhibitor                      | 0,909         | 0,002 |
| 0,943       | 0,002 | Alkane 1-monooxygenase inhibitor                         | 0,908         | 0,003 |
| 0,941       | 0,003 | Sugar-phosphatase inhibitor                              | 0,910         | 0,005 |
| 0,938       | 0,002 | NADPH-cytochrome-c2 reductase inhibitor                  | 0,908         | 0,004 |
| 0,934       | 0,001 | Threonine aldolase inhibitor                             | 0,907         | 0,004 |
| 0,933       | 0,002 | 2-Hydroxyquinoline 8-monooxygenase inhibitor             | 0,907         | 0,004 |
| 0,933       | 0,002 | Glucan endo-1,6-beta-glucosidase inhibitor               | 0,904         | 0,002 |
| 0,932       | 0,002 | Arylsulfate sulfotransferase inhibitor                   | 0,904         | 0,004 |
| 0,930       | 0,002 | Ribulose-phosphate 3-epimerase inhibitor                 | 0,897         | 0,003 |
| 0,929       | 0,002 | 2-Nitropropane dioxygenase inhibitor                     | 0,896         | 0,003 |
| 0,928       | 0,004 | Alkenylglycerophosphocholine hydrolase inhibitor         | 0,895         | 0,003 |
| 0,928       | 0,003 | Monodehydroascorbate reductase (NADH) inhibitor          | 0,893         | 0,004 |
| 0,926       | 0,002 | UDP-N-acetylglucosamine 4-epimerase inhibitor            | 0,894         | 0,007 |
| 0,926       | 0,002 | Glutamyl endopeptidase II inhibitor                      | 0,886         | 0,003 |
| 0,924       | 0,002 | Aspartate-phenylpyruvate transaminase inhibitor          | 0,885         | 0,004 |
| 0,923       | 0,001 | Catechol 1,2-dioxygenase inhibitor                       | 0,883         | 0,004 |
| 0,923       | 0,002 | Fatty-acyl-CoA synthase inhibitor                        | 0,880         | 0,004 |
| 0,923       | 0,003 | Pullulanase inhibitor                                    | 0,879         | 0,003 |
| 0,923       | 0,005 | Methylenetetrahydrofolate reductase (NADPH) inhibitor    | 0,879         | 0,003 |
| 0,919       | 0,003 | Taurine dehydrogenase inhibitor                          | 0,878         | 0,003 |
| 0,919       | 0,003 | Prolyl aminopeptidase inhibitor                          | 0,881         | 0,007 |
| 0,915       | 0,002 | Corticosteroid side-chain-isomerase inhibitor            | 0,874         | 0,002 |
| 0,915       | 0,003 | Dextranase inhibitor                                     | 0,869         | 0,003 |
| 0,913       | 0,002 | Bisphosphoglycerate phosphatase inhibitor                | 0,866         | 0,001 |
| 0,915       | 0,004 | Ubiquinol-cytochrome-c reductase inhibitor               | 0,868         | 0,003 |
| 0,912       | 0,001 | Cis-1,2-dihydro-1,2-dihydroxynaphthalene dehydrogenase   | 0,868         | 0,004 |
| 0,910       | 0,003 | Arginine 2-monooxygenase inhibitor                       | 0,866         | 0,003 |
| 0,909       | 0,002 | Gamma-guanidinobutyraldehyde dehydrogenase inhibitor     | 0,865         | 0,004 |
| 0,910       | 0,003 | Antiseptic                                               | 0,863         | 0,004 |
| 0,909       | 0,002 | 5-O-(4-coumaroyl)-D-quininate 3'-monooxygenase inhibitor | 0,863         | 0,005 |
| 0,907       | 0,002 | Sulfite reductase inhibitor                              | 0,861         | 0,004 |
| 0,908       | 0,003 | 2-Dehydropantoate 2-reductase inhibitor                  | 0,861         | 0,004 |
| 0,905       | 0,002 | NADH kinase inhibitor                                    | 0,858         | 0,003 |
| 0,908       | 0,006 | Aspulvinone dimethylallyltransferase inhibitor           | 0,858         | 0,003 |
| 0,903       | 0,001 | Procollagen-lysine 5-dioxygenase inhibitor               | 0,853         | 0,003 |
| 0,905       | 0,004 | Glucose oxidase inhibitor                                | 0,854         | 0,003 |
| 0,901       | 0,002 | Alcohol oxidase inhibitor                                | 0,855         | 0,005 |
| 0,902       | 0,004 | Feruloyl esterase inhibitor                              | 0,855         | 0,005 |
| 0,901       | 0,003 | Phosphatidylcholine-retinol O-acyltransferase inhibitor  | 0,848         | 0,002 |
| 0,901       | 0,003 | Creatininase inhibitor                                   | 0,855         | 0,009 |

|         |       |                                                                    |         |       |
|---------|-------|--------------------------------------------------------------------|---------|-------|
| 0,901   | 0,004 | Aldehyde oxidase inhibitor                                         | 0,848   | 0,003 |
| 0,898   | 0,002 | Sulfite oxidase inhibitor                                          | 1 0,846 | 0,004 |
| 0,898   | 0,002 | Hyponitrite reductase inhibitor                                    | 0,842   | 0,003 |
| 0,898   | 0,003 | 3-Hydroxybenzoate 6-monooxygenase inhibitor                        | 0,846   | 0,008 |
| 0,897   | 0,001 | Aminobutyraldehyde dehydrogenase inhibitor                         | 0,839   | 0,002 |
| 0,899   | 0,005 | Sphinganine kinase inhibitor                                       | 0,841   | 0,003 |
| 0,898   | 0,004 | Anaphylatoxin receptor antagonist                                  | 0,839   | 0,003 |
| 0,898   | 0,004 | Superoxide dismutase inhibitor                                     | 0,840   | 0,004 |
| 0,896   | 0,003 | Fusarinine-C ornithinesterase inhibitor                            | 0,837   | 0,004 |
| 0,895   | 0,002 | Aryl-alcohol dehydrogenase (NADP+) inhibitor                       | 0,829   | 0,004 |
| 0,896   | 0,003 | 2-Hydroxymuconate-semialdehyde hydrolase inhibitor                 | 0,829   | 0,004 |
| 0,895   | 0,002 | Peptide alpha-N-acetyltransferase inhibitor                        | 0,829   | 0,005 |
| 0,895   | 0,003 | Dimethylargininase inhibitor                                       | 0,830   | 0,006 |
| 0,893   | 0,003 | N-benzyloxycarbonylglycine hydrolase inhibitor                     | 0,827   | 0,004 |
| 0,892   | 0,002 | Methylamine-glutamate N-methyltransferase inhibitor                | 0,827   | 0,005 |
| 0,890   | 0,002 | Chenodeoxycholytaurine hydrolase inhibitor                         | 0,825   | 0,003 |
| 1 0,891 | 0,003 | Peroxidase inhibitor                                               | 0,832   | 0,010 |
| 0,891   | 0,003 | Trans-acenaphthene-1,2-diol dehydrogenase inhibitor                | 0,823   | 0,004 |
| 0,890   | 0,002 | Electron-transferring-flavoprotein dehydrogenase inhibitor         | 0,822   | 0,003 |
| 0,891   | 0,002 | Glutamine-phenylpyruvate transaminase inhibitor                    | 0,821   | 0,003 |
| 0,890   | 0,003 | Polyamine-transporting ATPase inhibitor                            | 0,827   | 0,009 |
| 0,889   | 0,002 | Crotonoyl-[acyl-carrier-protein] hydratase inhibitor               | 0,819   | 0,002 |
| 0,888   | 0,002 | Phloroglucinol reductase inhibitor                                 | 2 0,821 | 0,004 |
| 0,887   | 0,001 | 2,5-Dihydroxypyridine 5,6-dioxygenase inhibitor                    | 0,820   | 0,004 |
| 0,887   | 0,002 | Taurocyamine kinase inhibitor                                      | 0,827   | 0,011 |
| 0,887   | 0,002 | Opheline kinase inhibitor                                          | 0,819   | 0,005 |
| 0,887   | 0,002 | 4-Methoxybenzoate monooxygenase (O-demethylating) inhibitor        | 0,816   | 0,002 |
| 0,886   | 0,002 | Gluconate 5-dehydrogenase inhibitor                                | 0,826   | 0,013 |
| 0,885   | 0,003 | Pterin deaminase inhibitor                                         | 0,816   | 0,004 |
| 0,885   | 0,002 | L-glutamate oxidase inhibitor                                      | 0,815   | 0,004 |
| 0,885   | 0,003 | Nitrate reductase (cytochrome) inhibitor                           | 0,814   | 0,003 |
| 0,884   | 0,002 | Magnesium-protoporphyrin IX monomethyl ester (oxidation) inhibitor | 0,813   | 0,003 |
| 0,888   | 0,007 | Glutamate-5-semialdehyde dehydrogenase inhibitor                   | 3 0,837 | 0,027 |
| 0,883   | 0,003 | L-glucuronate reductase inhibitor                                  | 0,808   | 0,004 |
| 0,881   | 0,001 | Glyoxylate oxidase inhibitor                                       | 0,806   | 0,006 |
| 0,882   | 0,002 | N-acetylneuraminase synthase inhibitor                             | 0,815   | 0,015 |
| 0,882   | 0,002 | S-alkylcysteine lyase inhibitor                                    | 0,802   | 0,004 |
| 0,881   | 0,002 | N-acylmannosamine kinase inhibitor                                 | 0,802   | 0,005 |
| 0,881   | 0,002 | Rhamnulose-1-phosphate aldolase inhibitor                          | 0,804   | 0,007 |
| 0,881   | 0,002 | Cyclohexyl-isocyanide hydratase inhibitor                          | 0,800   | 0,004 |
| 0,881   | 0,002 | 3-Hydroxybenzoate 4-monooxygenase inhibitor                        | 0,800   | 0,005 |
| 0,882   | 0,003 | Acetyltransferase inhibitor                                        | 0,799   | 0,004 |
| 0,881   | 0,002 | tRNA-pseudouridine synthase I inhibitor                            | 0,797   | 0,003 |
| 0,880   | 0,002 | N-Acyl-D-aspartate deacylase inhibitor                             | 0,798   | 0,004 |
| 0,880   | 0,003 | Exoribonuclease II inhibitor                                       | 0,795   | 0,002 |
| 2 0,890 | 0,014 | Membrane integrity agonist                                         | 0,797   | 0,004 |
| 0,878   | 0,002 | Naphthalene 1,2-dioxygenase inhibitor                              | 0,794   | 0,002 |

|       |       |                                                           |       |       |
|-------|-------|-----------------------------------------------------------|-------|-------|
| 0,878 | 0,002 | Ferredoxin-NAD+ reductase inhibitor                       | 0,794 | 0,002 |
| 0,878 | 0,002 | NADPH-ferrihemoprotein reductase inhibitor                | 0,795 | 0,004 |
| 0,882 | 0,007 | Benzoate-CoA ligase inhibitor                             | 0,794 | 0,004 |
| 0,877 | 0,002 | Benzoate 4-monooxygenase inhibitor                        | 0,794 | 0,003 |
| 0,877 | 0,003 | Allyl-alcohol dehydrogenase inhibitor                     | 0,800 | 0,010 |
| 0,878 | 0,003 | Glucan endo-1,3-beta-D-glucosidase inhibitor              | 0,794 | 0,003 |
| 0,876 | 0,002 | Phosphatidylserine decarboxylase inhibitor                | 0,794 | 0,003 |
| 0,875 | 0,003 | Poly(alpha-L-guluronate) lyase inhibitor                  | 0,792 | 0,002 |
| 0,876 | 0,004 | ADP-thymidine kinase inhibitor                            | 0,794 | 0,004 |
| 0,873 | 0,002 | Tryptophanamidase inhibitor                               | 0,796 | 0,007 |
| 0,873 | 0,003 | Aldehyde dehydrogenase (pyrroloquinoline-quinone) inhibi  | 0,792 | 0,004 |
| 0,872 | 0,003 | Mucinamylserine mucinaminidase inhibitor                  | 0,791 | 0,005 |
| 0,871 | 0,002 | Fructan beta-fructosidase inhibitor                       | 0,792 | 0,008 |
| 0,871 | 0,003 | Spermidine dehydrogenase inhibitor                        | 0,783 | 0,003 |
| 0,869 | 0,003 | Aspartate-ammonia ligase inhibitor                        | 0,784 | 0,004 |
| 0,868 | 0,002 | Long-chain-aldehyde dehydrogenase inhibitor               | 0,783 | 0,004 |
| 0,867 | 0,001 | Lactaldehyde reductase inhibitor                          | 0,784 | 0,006 |
| 0,869 | 0,004 | N-acetylneuraminate 7-O(or 9-O)-acetyltransferase inhibit | 0,782 | 0,004 |
| 0,868 | 0,003 | Arylalkyl acylamidase inhibitor                           | 0,781 | 0,004 |
| 0,870 | 0,005 | NADPH peroxidase inhibitor                                | 0,780 | 0,003 |
| 0,868 | 0,003 | Formaldehyde transketolase inhibitor                      | 0,780 | 0,004 |
| 0,867 | 0,002 | N-methylhydantoinase (ATP-hydrolysing) inhibitor          | 0,796 | 0,020 |
| 0,866 | 0,003 | 4-Hydroxyproline epimerase inhibitor                      | 0,780 | 0,004 |
| 0,865 | 0,002 | Carbon-monoxide dehydrogenase inhibitor                   | 0,781 | 0,006 |
| 0,866 | 0,002 | Pyruvate decarboxylase inhibitor                          | 0,782 | 0,008 |
| 0,865 | 0,002 | Anthranilate 3-monooxygenase (deaminating) inhibitor      | 0,779 | 0,005 |
| 0,864 | 0,001 | 2,6-Dihydroxypyridine 3-monooxygenase inhibitor           | 0,778 | 0,004 |
| 0,864 | 0,002 | Catechol 2,3-dioxygenase inhibitor                        | 0,778 | 0,004 |
| 0,863 | 0,002 | 2-Oxoaldehyde dehydrogenase (NADP+) inhibitor             | 0,777 | 0,004 |
| 0,867 | 0,007 | Pro-opiomelanocortin converting enzyme inhibitor          | 0,775 | 0,003 |
| 0,864 | 0,003 | Amine dehydrogenase inhibitor                             | 0,778 | 0,007 |
| 0,863 | 0,003 | Urethanase inhibitor                                      | 0,771 | 0,002 |
| 0,862 | 0,002 | Histidinol-phosphatase inhibitor                          | 0,781 | 0,015 |
| 0,860 | 0,001 | Gentisate 1,2-dioxygenase inhibitor                       | 0,770 | 0,004 |
| 0,862 | 0,003 | Xylan endo-1,3-beta-xylosidase inhibitor                  | 0,785 | 0,020 |
| 0,859 | 0,002 | 2-Dehydropantolactone reductase (A-specific) inhibitor    | 0,777 | 0,012 |
| 0,859 | 0,001 | Phenylpyruvate decarboxylase inhibitor                    | 0,766 | 0,004 |
| 0,859 | 0,002 | Beta-carotene 15,15'-monooxygenase inhibitor              | 0,763 | 0,005 |
| 0,858 | 0,003 | 1,4-Lactonase inhibitor                                   | 0,760 | 0,003 |
| 0,858 | 0,003 | Cholestanetriol 26-monooxygenase inhibitor                | 0,765 | 0,007 |
| 0,858 | 0,002 | Tpr proteinase (Porphyromonas gingivalis) inhibitor       | 0,764 | 0,006 |
| 0,859 | 0,003 | Mitochondrial processing peptidase inhibitor              | 0,760 | 0,003 |
| 0,858 | 0,003 | Phenol O-methyltransferase inhibitor                      | 0,773 | 0,016 |
| 0,857 | 0,002 | Uroporphyrinogen-III synthase inhibitor                   | 0,759 | 0,003 |
| 0,858 | 0,003 | Sarcosine oxidase inhibitor                               | 0,793 | 0,038 |
| 0,856 | 0,002 | Glyoxylate reductase inhibitor                            | 0,756 | 0,002 |
| 0,854 | 0,003 | Peptide-N4-(N-acetyl-beta-glucosaminy)asparagine amid     | 0,755 | 0,003 |

|       |       |                                                     |       |       |
|-------|-------|-----------------------------------------------------|-------|-------|
| 0,853 | 0,003 | 4-Nitrophenol 2-monooxygenase inhibitor             | 0,754 | 0,003 |
| 0,852 | 0,003 | Anthranilate-CoA ligase inhibitor                   | 0,754 | 0,004 |
| 0,852 | 0,003 | Poly(beta-D-mannuronate) lyase inhibitor            | 0,751 | 0,003 |
| 0,849 | 0,001 | 2-Pyrocatechuate decarboxylase inhibitor            | 0,757 | 0,010 |
| 0,849 | 0,002 | Mannan endo-1,4-beta-mannosidase inhibitor          | 0,752 | 0,006 |
| 0,849 | 0,002 | 6-Pyruvoyltetrahydropterin synthase inhibitor       | 0,749 | 0,004 |
| 0,849 | 0,002 | 4-Chlorophenylacetate 3,4-dioxygenase inhibitor     | 0,747 | 0,002 |
| 0,855 | 0,009 | Antieczematic                                       | 0,747 | 0,003 |
| 0,850 | 0,004 | Lysine 2,3-aminomutase inhibitor                    | 0,749 | 0,005 |
| 0,849 | 0,005 | Fragilysin inhibitor                                | 0,748 | 0,008 |
| 0,846 | 0,002 | Acylphosphatase inhibitor                           | 0,744 | 0,004 |
| 0,846 | 0,002 | Triacetate-lactonase inhibitor                      | 0,744 | 0,004 |
| 0,846 | 0,002 | 6-Carboxyhexanoate-CoA ligase inhibitor             | 0,744 | 0,004 |
| 0,846 | 0,002 | Homoaconitate hydratase inhibitor                   | 0,744 | 0,005 |
| 0,846 | 0,002 | Biotin-CoA ligase inhibitor                         | 0,741 | 0,004 |
| 0,847 | 0,003 | Fructose 5-dehydrogenase inhibitor                  | 0,740 | 0,004 |
| 0,845 | 0,002 | Glycerol dehydratase inhibitor                      | 0,741 | 0,005 |
| 0,846 | 0,003 | Transketolase inhibitor                             | 0,741 | 0,009 |
| 0,846 | 0,003 | Limulus clotting factor B inhibitor                 | 0,735 | 0,003 |
| 0,843 | 0,003 | Prostaglandin-A1 DELTA-isomerase inhibitor          | 0,738 | 0,007 |
| 0,842 | 0,002 | Glutarate-semialdehyde dehydrogenase inhibitor      | 0,735 | 0,005 |
| 0,842 | 0,003 | Pectate lyase inhibitor                             | 0,734 | 0,005 |
| 0,840 | 0,002 | 2-Oxoglutarate decarboxylase inhibitor              | 0,736 | 0,008 |
| 0,840 | 0,002 | D-xylulose reductase inhibitor                      | 0,731 | 0,004 |
| 0,839 | 0,002 | Gamma-butyrobetaine dioxygenase inhibitor           | 0,730 | 0,004 |
| 0,838 | 0,002 | 3-Hydroxy-4-oxoquinoline 2,4-dioxygenase inhibitor  | 0,729 | 0,004 |
| 0,838 | 0,002 | Styrene-oxide isomerase inhibitor                   | 0,729 | 0,004 |
| 0,838 | 0,002 | Ornithine cyclodeaminase inhibitor                  | 0,738 | 0,013 |
| 0,839 | 0,004 | Levanase inhibitor                                  | 0,726 | 0,004 |
| 0,838 | 0,002 | Aminocarboxymuconate-semialdehyde decarboxylase inh | 0,748 | 0,026 |
| 0,837 | 0,002 | Guanidinoacetase inhibitor                          | 0,728 | 0,007 |
| 0,838 | 0,003 | Hydrogen dehydrogenase inhibitor                    | 0,725 | 0,005 |
| 0,838 | 0,003 | Carnitinamidase inhibitor                           | 0,723 | 0,005 |
| 0,837 | 0,002 | 4-Hydroxyglutamate transaminase inhibitor           | 0,725 | 0,006 |
| 0,836 | 0,002 | Mannitol-1-phosphatase inhibitor                    | 0,724 | 0,006 |
| 0,835 | 0,002 | Salicylate 1-monooxygenase inhibitor                | 0,721 | 0,004 |
| 0,836 | 0,003 | Preneoplastic conditions treatment                  | 0,722 | 0,004 |
| 0,835 | 0,002 | 3-Carboxyethylcatechol 2,3-dioxygenase inhibitor    | 0,721 | 0,005 |
| 0,835 | 0,003 | Leucolysin inhibitor                                | 0,719 | 0,004 |
| 0,834 | 0,002 | Vanillyl-alcohol oxidase inhibitor                  | 0,717 | 0,002 |
| 0,836 | 0,004 | Phospholipid-translocating ATPase inhibitor         | 0,720 | 0,005 |
| 0,834 | 0,002 | Creatinine deaminase inhibitor                      | 0,719 | 0,005 |
| 0,833 | 0,002 | Gluconolactonase inhibitor                          | 0,717 | 0,003 |
| 0,834 | 0,003 | Nicotinate dehydrogenase inhibitor                  | 0,747 | 0,032 |
| 0,830 | 0,001 | Shikimate 5-dehydrogenase inhibitor                 | 0,747 | 0,032 |
| 0,831 | 0,003 | S-formylglutathione hydrolase inhibitor             | 0,747 | 0,032 |
| 0,830 | 0,002 | Camphor 1,2-monooxygenase inhibitor                 | 0,717 | 0,004 |



|       |       |                                                             |       |       |
|-------|-------|-------------------------------------------------------------|-------|-------|
| 0,830 | 0,002 | N-carbamoyl-L-amino-acid hydrolase inhibitor                | 0,717 | 0,004 |
| 0,830 | 0,003 | Aryldialkylphosphatase inhibitor                            | 0,717 | 0,004 |
| 0,830 | 0,003 | Laccase inhibitor                                           | 0,717 | 0,004 |
| 0,849 | 0,024 | CYP2C12 substrate                                           | 0,718 | 0,004 |
| 0,828 | 0,003 | 2-Haloacid dehalogenase (configuration-inverting) inhibitor | 0,717 | 0,004 |
| 0,827 | 0,003 | Opine dehydrogenase inhibitor                               | 0,718 | 0,006 |
| 0,828 | 0,005 | Antiinfective                                               | 0,716 | 0,004 |
| 0,826 | 0,002 | CDP-4-dehydro-6-deoxyglucose reductase inhibitor            | 0,719 | 0,007 |
| 0,827 | 0,004 | DNA-(apurinic or apyrimidinic site) lyase inhibitor         | 0,714 | 0,004 |
| 0,824 | 0,002 | Mannan endo-1,6-alpha-mannosidase inhibitor                 | 0,713 | 0,004 |
| 0,835 | 0,013 | Antiseborrheic                                              | 0,713 | 0,006 |
| 0,824 | 0,002 | D-alanine 2-hydroxymethyltransferase inhibitor              | 0,709 | 0,003 |
| 0,821 | 0,002 | 3-Oxadipate enol-lactonase inhibitor                        | 0,707 | 0,003 |
| 0,821 | 0,003 | Thymidylate 5'-phosphatase inhibitor                        | 0,707 | 0,004 |
| 0,823 | 0,004 | Fibrinolytic                                                | 0,704 | 0,002 |
| 0,822 | 0,004 | Centromere associated protein inhibitor                     | 0,706 | 0,004 |
| 0,819 | 0,002 | 3-Hydroxyphenylacetate 6-hydroxylase inhibitor              | 0,714 | 0,012 |
| 0,821 | 0,003 | Catechol oxidase inhibitor                                  | 0,705 | 0,005 |
| 0,819 | 0,002 | GABA C receptor agonist                                     | 0,702 | 0,003 |
| 0,817 | 0,002 | Diiodophenylpyruvate reductase inhibitor                    | 0,704 | 0,005 |
| 0,816 | 0,001 | Glycerol-1-phosphatase inhibitor                            | 0,706 | 0,007 |
| 0,814 | 0,002 | Glycerol dehydrogenase (NADP+) inhibitor                    | 0,704 | 0,009 |
| 0,814 | 0,002 | Glycerol 2-dehydrogenase (NADP+) inhibitor                  | 0,703 | 0,008 |
| 0,813 | 0,002 | N-acetyl-gamma-glutamyl-phosphate reductase inhibitor       | 0,700 | 0,005 |
| 0,814 | 0,003 | Phenylacetate-CoA ligase inhibitor                          | 0,701 | 0,008 |
| 0,814 | 0,003 | (R)-6-hydroxynicotine oxidase inhibitor                     | 0,701 | 0,009 |
| 0,814 | 0,003 | (R)-Pantolactone dehydrogenase (flavin) inhibitor           | 0,700 | 0,007 |
| 0,814 | 0,003 | Bothrolysin inhibitor                                       | 0,704 | 0,012 |
| 0,812 | 0,001 | Astringent                                                  | 0,696 | 0,004 |
| 0,812 | 0,002 | N-hydroxy-2-acetamidofluorene reductase inhibitor           | 0,696 | 0,004 |
| 0,812 | 0,002 | Benzaldehyde dehydrogenase (NADP+) inhibitor                | 0,693 | 0,002 |
| 0,812 | 0,002 | Trans-pentaprenyltranstransferase inhibitor                 | 0,704 | 0,015 |
| 0,811 | 0,002 | Trans-2-enoyl-CoA reductase (NAD+) inhibitor                | 0,712 | 0,024 |
| 0,811 | 0,002 | Pyruvate dehydrogenase (cytochrome) inhibitor               | 0,693 | 0,005 |
| 0,811 | 0,004 | Histidine N-acetyltransferase inhibitor                     | 0,691 | 0,004 |
| 0,811 | 0,004 | D-lactaldehyde dehydrogenase inhibitor                      | 0,690 | 0,003 |
| 0,815 | 0,008 | Membrane permeability inhibitor                             | 0,692 | 0,005 |
| 0,809 | 0,003 | Inulinase inhibitor                                         | 0,690 | 0,003 |
| 0,809 | 0,003 | Alkenylglycerophosphoethanolamine hydrolase inhibitor       | 0,688 | 0,003 |
| 0,809 | 0,003 | 4-Phytase inhibitor                                         | 0,688 | 0,004 |
| 0,808 | 0,002 | Glycolate dehydrogenase inhibitor                           | 0,728 | 0,044 |
| 0,807 | 0,004 | Aryl-acylamidase inhibitor                                  | 0,704 | 0,022 |
| 0,804 | 0,003 | Glycopeptide alpha-N-acetylgalactosaminidase inhibitor      | 0,704 | 0,022 |
| 0,803 | 0,003 | Acetyloronithine deacetylase inhibitor                      | 0,686 | 0,004 |
| 0,814 | 0,015 | Mucomembranous protector                                    | 0,685 | 0,004 |
| 0,803 | 0,004 | P-benzoquinone reductase (NADPH) inhibitor                  | 0,682 | 0,002 |
| 0,801 | 0,002 | Lysine 6-dehydrogenase inhibitor                            | 0,687 | 0,007 |

|       |       |                                                                 |       |       |
|-------|-------|-----------------------------------------------------------------|-------|-------|
| 0,801 | 0,002 | 3-Hydroxybutyryl-CoA dehydrogenase inhibitor                    | 0,684 | 0,004 |
| 0,801 | 0,002 | 2,4-Diaminopentanoate dehydrogenase inhibitor                   | 0,683 | 0,003 |
| 0,801 | 0,002 | tRNA nucleotidyltransferase inhibitor                           | 0,682 | 0,004 |
| 0,801 | 0,002 | Pantoate 4-dehydrogenase inhibitor                              | 0,686 | 0,009 |
| 0,801 | 0,002 | Aspartyl aminopeptidase inhibitor                               | 0,684 | 0,007 |
| 0,801 | 0,003 | 4-Hydroxyphenylacetate 3-monooxygenase inhibitor                | 0,684 | 0,007 |
| 0,797 | 0,002 | Nicotine dehydrogenase inhibitor                                | 0,679 | 0,003 |
| 0,798 | 0,004 | Phosphoinositide 5-phosphatase inhibitor                        | 0,686 | 0,009 |
| 0,796 | 0,002 | Quinoprotein glucose dehydrogenase inhibitor                    | 0,678 | 0,003 |
| 0,795 | 0,003 | Polygalacturonase inhibitor                                     | 0,681 | 0,005 |
| 0,793 | 0,003 | N-Acyl-D-amino-acid deacylase inhibitor                         | 0,735 | 0,060 |
| 0,794 | 0,003 | Cyclomaltoextrinase inhibitor                                   | 0,679 | 0,004 |
| 0,793 | 0,003 | L-threonine 3-dehydrogenase inhibitor                           | 0,678 | 0,003 |
| 0,790 | 0,002 | Phenol 2-monooxygenase inhibitor                                | 0,677 | 0,004 |
| 0,788 | 0,001 | 3,4-Dihydroxy-9,10-secoandrosta-1,3,5(10)-triene-9,17-diol      | 0,678 | 0,004 |
| 0,789 | 0,002 | Cystathionine beta-synthase inhibitor                           | 0,677 | 0,005 |
| 0,805 | 0,020 | CYP2J substrate                                                 | 0,674 | 0,003 |
| 0,795 | 0,010 | Lysase inhibitor                                                | 0,674 | 0,003 |
| 0,798 | 0,014 | Mucositis treatment                                             | 0,673 | 0,005 |
| 0,787 | 0,004 | Phosphatidylglycerophosphatase inhibitor                        | 0,672 | 0,004 |
| 0,785 | 0,004 | Isopenicillin-N epimerase inhibitor                             | 0,673 | 0,004 |
| 0,785 | 0,004 | Sulfite dehydrogenase inhibitor                                 | 0,672 | 0,004 |
| 0,784 | 0,003 | Phenylalanine(histidine) transaminase inhibitor                 | 0,672 | 0,004 |
| 0,783 | 0,002 | Methylaspartate ammonia-lyase inhibitor                         | 0,671 | 0,004 |
| 0,784 | 0,003 | Nitrilase inhibitor                                             | 0,672 | 0,005 |
| 0,783 | 0,003 | Arylsulfatase inhibitor                                         | 0,671 | 0,004 |
| 0,784 | 0,003 | Nitrite reductase [NAD(P)H] inhibitor                           | 0,671 | 0,004 |
| 0,782 | 0,002 | Diphosphomevalonate decarboxylase inhibitor                     | 0,671 | 0,004 |
| 0,780 | 0,002 | 3-Demethylubiquinone-9 3-O-methyltransferase inhibitor          | 0,669 | 0,003 |
| 0,781 | 0,003 | Hydroxylamine reductase (NADH) inhibitor                        | 0,670 | 0,004 |
| 0,782 | 0,005 | Methylumbelliferyl-acetate deacetylase inhibitor                | 0,673 | 0,010 |
| 0,786 | 0,009 | JAK2 expression inhibitor                                       | 0,667 | 0,005 |
| 0,779 | 0,003 | Protein-Npi-phosphohistidine-sugar phosphotransferase inhibitor | 0,664 | 0,006 |
| 0,779 | 0,004 | Kidney function stimulant                                       | 0,661 | 0,003 |
| 0,789 | 0,014 | Beta-adrenergic receptor kinase inhibitor                       | 0,661 | 0,003 |
| 0,789 | 0,014 | G-protein-coupled receptor kinase inhibitor                     | 0,662 | 0,005 |
| 0,778 | 0,004 | APOA1 expression enhancer                                       | 0,663 | 0,006 |
| 0,776 | 0,003 | 2,3-Dihydroxyindole 2,3-dioxygenase inhibitor                   | 0,661 | 0,005 |
| 0,780 | 0,007 | Linoleate diol synthase inhibitor                               | 0,662 | 0,007 |
| 0,774 | 0,002 | Ferredoxin-nitrite reductase inhibitor                          | 0,656 | 0,002 |
| 0,774 | 0,002 | Hippurate hydrolase inhibitor                                   | 0,657 | 0,003 |
| 0,774 | 0,002 | Beta-amylase inhibitor                                          | 0,658 | 0,004 |
| 0,779 | 0,009 | Carboxypeptidase Taq inhibitor                                  | 0,656 | 0,003 |
| 0,771 | 0,002 | Carboxylate reductase inhibitor                                 | 0,656 | 0,004 |
| 0,785 | 0,016 | Glycosylphosphatidylinositol phospholipase D inhibitor          | 0,656 | 0,004 |
| 0,779 | 0,011 | Prostaglandin-E2 9-reductase inhibitor                          | 0,656 | 0,004 |
| 0,774 | 0,006 | Lipoprotein lipase inhibitor                                    | 0,661 | 0,009 |

|       |       |                                                          |         |       |
|-------|-------|----------------------------------------------------------|---------|-------|
| 0,769 | 0,002 | D-amino-acid dehydrogenase inhibitor                     | 0,655   | 0,003 |
| 0,782 | 0,016 | CYP2J2 substrate                                         | 0,659   | 0,010 |
| 0,767 | 0,001 | Quinate 5-dehydrogenase inhibitor                        | 0,654   | 0,004 |
| 0,768 | 0,002 | Succinate-semialdehyde dehydrogenase [NAD(P)+] inhibitor | 0,652   | 0,003 |
| 0,768 | 0,003 | Peptide-tryptophan 2,3-dioxygenase inhibitor             | 0,653   | 0,004 |
| 0,766 | 0,003 | Chitosanase inhibitor                                    | 0,653   | 0,006 |
| 0,766 | 0,003 | Pyruvate dehydrogenase (lipoamide) inhibitor             | 0,696   | 0,052 |
| 0,765 | 0,002 | Aminomuconate-semialdehyde dehydrogenase inhibitor       | 0,646   | 0,003 |
| 0,765 | 0,003 | 2-Enoate reductase inhibitor                             | 0,652   | 0,009 |
| 0,764 | 0,002 | Phosphoglycerate mutase inhibitor                        | 0,665   | 0,024 |
| 0,762 | 0,002 | 2,4-Dichlorophenol 6-monooxygenase inhibitor             | 0,647   | 0,005 |
| 0,763 | 0,003 | Licheninase inhibitor                                    | 0,645   | 0,005 |
| 0,762 | 0,003 | Dimethylmaleate hydratase inhibitor                      | 0,642   | 0,004 |
| 0,761 | 0,002 | Glucan endo-1,3-alpha-glucosidase inhibitor              | 0,640   | 0,001 |
| 0,762 | 0,003 | Arylesterase inhibitor                                   | 0,643   | 0,005 |
| 0,759 | 0,002 | Chloramphenicol O-acetyltransferase inhibitor            | 0,646   | 0,007 |
| 0,761 | 0,007 | Manganese peroxidase inhibitor                           | 0,643   | 0,006 |
| 0,755 | 0,001 | Orotate reductase (NADPH) inhibitor                      | 0,650   | 0,013 |
| 0,754 | 0,002 | 4-Hydroxybenzoate 3-monooxygenase inhibitor              | 0,636   | 0,003 |
| 0,754 | 0,001 | 3,4-Dihydroxyphenylacetate 2,3-dioxygenase inhibitor     | 0,636   | 0,003 |
| 0,754 | 0,003 | H+-exporting ATPase inhibitor                            | 0,641   | 0,008 |
| 0,753 | 0,003 | Cyanoalanine nitrilase inhibitor                         | 0,637   | 0,004 |
| 0,752 | 0,002 | 3-Aminobutyryl-CoA ammonia-lyase inhibitor               | 0,637   | 0,005 |
| 0,758 | 0,008 | Phthalate 4,5-dioxygenase inhibitor                      | 0,635   | 0,003 |
| 0,760 | 0,011 | Complement factor D inhibitor                            | 0,636   | 0,005 |
| 0,751 | 0,002 | L-iduronidase inhibitor                                  | 0,641   | 0,010 |
| 0,751 | 0,003 | Myosin ATPase inhibitor                                  | 0,641   | 0,011 |
| 0,751 | 0,003 | Alpha-N-acetylglucosaminidase inhibitor                  | 0,634   | 0,005 |
| 0,750 | 0,002 | L-amino-acid oxidase inhibitor                           | 0,640   | 0,010 |
| 0,751 | 0,004 | Beta-mannosidase inhibitor                               | 0,647   | 0,018 |
| 0,750 | 0,003 | Glutaminase inhibitor                                    | 0,636   | 0,010 |
| 0,750 | 0,003 | Thiosulfate dehydrogenase inhibitor                      | 0,634   | 0,008 |
| 0,748 | 0,002 | Glutamate decarboxylase inhibitor                        | 0,629   | 0,003 |
| 0,748 | 0,003 | Plasmanylethanolamine desaturase inhibitor               | 0,627   | 0,004 |
| 0,748 | 0,004 | Alcohol dehydrogenase (NADP+) inhibitor                  | 0,628   | 0,005 |
| 0,752 | 0,008 | Glycerol-ether monooxygenase inhibitor                   | 0,626   | 0,003 |
| 0,747 | 0,003 | Benzoylformate decarboxylase inhibitor                   | 0,649   | 0,028 |
| 0,748 | 0,005 | Insulysin inhibitor                                      | 0,635   | 0,016 |
| 0,770 | 0,027 | Saccharopepsin inhibitor                                 | 0,643   | 0,025 |
| 0,770 | 0,027 | Chymosin inhibitor                                       | 0,661   | 0,043 |
| 0,770 | 0,027 | Acrocyllindropepsin inhibitor                            | 0,619   | 0,003 |
| 0,743 | 0,002 | Cyclamate sulfohydrolase inhibitor                       | 0,621   | 0,005 |
| 0,743 | 0,003 | Acetate kinase inhibitor                                 | 0,620   | 0,005 |
| 0,743 | 0,004 | Leukotriene-B4 20-monooxygenase inhibitor                | 0,626   | 0,011 |
| 0,741 | 0,003 | Gly-X carboxypeptidase inhibitor                         | 4 0,619 | 0,005 |
| 0,779 | 0,041 | Phobic disorders treatment                               | 0,621   | 0,008 |
| 0,741 | 0,004 | Biotinidase inhibitor                                    | 0,616   | 0,003 |

|       |       |                                                            |         |       |
|-------|-------|------------------------------------------------------------|---------|-------|
| 0,740 | 0,005 | X-methyl-His dipeptidase inhibitor                         | 0,615   | 0,004 |
| 0,739 | 0,004 | N-hydroxyarylamine O-acetyltransferase inhibitor           | 0,658   | 0,047 |
| 0,737 | 0,002 | Leucine dehydrogenase inhibitor                            | 0,615   | 0,004 |
| 0,737 | 0,002 | Vomilenine glucosyltransferase inhibitor                   | 0,614   | 0,004 |
| 0,737 | 0,004 | Coccolysin inhibitor                                       | 0,630   | 0,020 |
| 0,734 | 0,003 | 4-Coumarate-CoA ligase inhibitor                           | 0,627   | 0,018 |
| 0,733 | 0,003 | Phenylalanine 4-hydroxylase inhibitor                      | 0,616   | 0,007 |
| 0,735 | 0,005 | Butyrate-CoA ligase inhibitor                              | 0,610   | 0,003 |
| 0,733 | 0,003 | Nicotinamidase inhibitor                                   | 5 0,627 | 0,021 |
| 0,733 | 0,004 | Procollagen N-endopeptidase inhibitor                      | 0,611   | 0,007 |
| 0,731 | 0,002 | Dopachrome isomerase inhibitor                             | 0,608   | 0,005 |
| 0,730 | 0,003 | Carnosine synthase inhibitor                               | 0,607   | 0,005 |
| 0,732 | 0,005 | HMOX1 expression enhancer                                  | 0,605   | 0,004 |
| 0,736 | 0,010 | Pitrilysin inhibitor                                       | 0,604   | 0,004 |
| 0,728 | 0,003 | 2,2-Dialkylglycine decarboxylase (pyruvate) inhibitor      | 0,606   | 0,005 |
| 0,730 | 0,005 | UGT1A6 substrate                                           | 0,617   | 0,018 |
| 0,727 | 0,003 | Cyclopentanone monooxygenase inhibitor                     | 0,605   | 0,006 |
| 0,726 | 0,002 | Urease inhibitor                                           | 0,618   | 0,019 |
| 0,730 | 0,006 | Ecdysone 20-monooxygenase inhibitor                        | 0,614   | 0,015 |
| 0,727 | 0,004 | Rubredoxin-NAD+ reductase inhibitor                        | 0,600   | 0,002 |
| 0,725 | 0,002 | Lombricine kinase inhibitor                                | 0,605   | 0,010 |
| 0,741 | 0,018 | Protein-glutamate methylesterase inhibitor                 | 0,607   | 0,013 |
| 0,725 | 0,002 | Dihydroxy-acid dehydratase inhibitor                       | 0,597   | 0,003 |
| 0,744 | 0,022 | Nicotinic alpha6beta3beta4alpha5 receptor antagonist       | 0,600   | 0,006 |
| 0,727 | 0,007 | Lysostaphin inhibitor                                      | 0,603   | 0,010 |
| 0,723 | 0,002 | 3-Cyanoalanine hydratase inhibitor                         | 0,597   | 0,005 |
| 0,724 | 0,004 | UGT2B1 substrate                                           | 0,596   | 0,004 |
| 0,721 | 0,003 | Aryl-alcohol dehydrogenase inhibitor                       | 0,595   | 0,003 |
| 0,718 | 0,001 | 4,5-Dihydroxyphthalate decarboxylase inhibitor             | 0,593   | 0,004 |
| 0,733 | 0,016 | Alkylacetylgllycerophosphatase inhibitor                   | 0,593   | 0,004 |
| 0,720 | 0,003 | 1-Alkylglycerophosphocholine O-acetyltransferase inhibitor | 0,598   | 0,009 |
| 0,737 | 0,021 | Acylcarnitine hydrolase inhibitor                          | 0,591   | 0,004 |
| 0,719 | 0,004 | N-(long-chain-acyl)ethanolamine deacylase inhibitor        | 0,594   | 0,007 |
| 0,719 | 0,004 | Malate dehydrogenase (acceptor) inhibitor                  | 0,588   | 0,003 |
| 0,717 | 0,003 | DNA-3-methyladenine glycosylase I inhibitor                | 0,587   | 0,003 |
| 0,718 | 0,005 | Cyclohexanone monooxygenase inhibitor                      | 0,587   | 0,004 |
| 0,715 | 0,003 | Porphobilinogen synthase inhibitor                         | 0,596   | 0,014 |
| 0,715 | 0,003 | Gallate decarboxylase inhibitor                            | 0,587   | 0,005 |
| 0,713 | 0,002 | Protocatechuate 3,4-dioxygenase inhibitor                  | 0,591   | 0,008 |
| 0,713 | 0,003 | Indoleacetaldoxime dehydratase inhibitor                   | 0,586   | 0,003 |
| 0,710 | 0,002 | Acyl-lysine deacylase inhibitor                            | 0,614   | 0,033 |
| 0,709 | 0,006 | Aspartyltransferase inhibitor                              | 0,596   | 0,015 |
| 0,717 | 0,013 | Oxidoreductase inhibitor                                   | 0,584   | 0,006 |
| 0,707 | 0,004 | Aldehyde dehydrogenase (NADP+) inhibitor                   | 0,592   | 0,014 |
| 0,706 | 0,005 | Cytochrome-b5 reductase inhibitor                          | 0,581   | 0,003 |
| 0,703 | 0,002 | Glutathione dehydrogenase (ascorbate) inhibitor            | 0,589   | 0,013 |
| 0,708 | 0,008 | UGT1A9 substrate                                           | 0,586   | 0,010 |

|       |       |                                                     |         |       |
|-------|-------|-----------------------------------------------------|---------|-------|
| 0,702 | 0,003 | Alanine transaminase inhibitor                      | 0,580   | 0,004 |
| 0,701 | 0,002 | (S)-3-hydroxyacid ester dehydrogenase inhibitor     | 0,581   | 0,005 |
| 0,699 | 0,001 | 4-Hydroxybenzoate decarboxylase inhibitor           | 0,595   | 0,019 |
| 0,700 | 0,002 | Prephenate dehydrogenase inhibitor                  | 0,579   | 0,004 |
| 0,700 | 0,003 | Sphinganine-1-phosphate aldolase inhibitor          | 0,577   | 0,004 |
| 0,700 | 0,003 | Glucuronate isomerase inhibitor                     | 0,576   | 0,003 |
| 0,718 | 0,023 | TP53 expression enhancer                            | 0,588   | 0,015 |
| 0,700 | 0,005 | Erythropoiesis stimulant                            | 0,580   | 0,008 |
| 0,697 | 0,002 | Alcohol dehydrogenase [NAD(P)+] inhibitor           | 0,576   | 0,004 |
| 0,700 | 0,006 | Cathepsin T inhibitor                               | 0,589   | 0,018 |
| 0,711 | 0,018 | Pseudolysin inhibitor                               | 0,582   | 0,011 |
| 0,696 | 0,003 | Hydroxylamine reductase inhibitor                   | 0,575   | 0,005 |
| 0,696 | 0,003 | Galactose oxidase inhibitor                         | 0,604   | 0,035 |
| 0,712 | 0,019 | HIF1A expression inhibitor                          | 0,574   | 0,006 |
| 0,694 | 0,002 | Allantoinase inhibitor                              | 0,572   | 0,005 |
| 0,706 | 0,014 | UDP-glucuronosyltransferase substrate               | 0,569   | 0,004 |
| 0,696 | 0,005 | Glucan 1,4-alpha-maltotetrahydrolase inhibitor      | 0,571   | 0,006 |
| 0,694 | 0,004 | Penicillin amidase inhibitor                        | 0,580   | 0,017 |
| 0,694 | 0,005 | CYP2C8 inhibitor                                    | 0,570   | 0,008 |
| 0,693 | 0,003 | Mannose isomerase inhibitor                         | 0,568   | 0,007 |
| 0,689 | 0,001 | Protocatechuate 4,5-dioxygenase inhibitor           | 0,602   | 0,042 |
| 0,694 | 0,007 | 3-Phytase inhibitor                                 | 0,573   | 0,015 |
| 0,691 | 0,006 | Steroid N-acetylglucosaminyltransferase inhibitor   | 0,562   | 0,004 |
| 0,689 | 0,004 | Monophenol monooxygenase inhibitor                  | 0,567   | 0,012 |
| 0,689 | 0,005 | Alanine-tRNA ligase inhibitor                       | 0,574   | 0,021 |
| 0,685 | 0,001 | Phenylacetaldehyde dehydrogenase inhibitor          | 0,555   | 0,002 |
| 0,690 | 0,009 | Trimethylamine-oxide aldolase inhibitor             | 0,556   | 0,003 |
| 0,685 | 0,004 | Pyruvate dehydrogenase inhibitor                    | 0,560   | 0,009 |
| 0,683 | 0,003 | Glucan 1,6-alpha-glucosidase inhibitor              | 0,560   | 0,008 |
| 0,687 | 0,006 | Arylmalonate decarboxylase inhibitor                | 0,552   | 0,003 |
| 0,692 | 0,012 | Thioredoxin inhibitor                               | 0,553   | 0,004 |
| 0,681 | 0,003 | Trimethylamine-N-oxide reductase inhibitor          | 0,572   | 0,023 |
| 0,680 | 0,003 | Keratolytic                                         | 0,560   | 0,012 |
| 0,680 | 0,003 | Pseudouridylate synthase inhibitor                  | 6 0,559 | 0,012 |
| 0,680 | 0,003 | Thiopurine S-methyltransferase inhibitor            | 0,553   | 0,009 |
| 0,677 | 0,002 | Glucan 1,4-beta-glucosidase inhibitor               | 0,553   | 0,009 |
| 0,676 | 0,002 | Aryl sulfotransferase inhibitor                     | 0,547   | 0,004 |
| 0,677 | 0,003 | O-aminophenol oxidase inhibitor                     | 0,609   | 0,067 |
| 0,682 | 0,008 | N-formylmethionyl-peptidase inhibitor               | 0,553   | 0,012 |
| 0,679 | 0,006 | Pyroglutamyl-peptidase II inhibitor                 | 0,551   | 0,010 |
| 0,708 | 0,034 | CYP2H substrate                                     | 0,544   | 0,004 |
| 0,677 | 0,004 | Clavamate synthase inhibitor                        | 0,583   | 0,043 |
| 0,680 | 0,007 | Cytoprotectant                                      | 0,553   | 0,013 |
| 0,674 | 0,002 | Aconitate decarboxylase inhibitor                   | 0,567   | 0,028 |
| 0,676 | 0,005 | Ethanolamine-phosphate cytidyltransferase inhibitor | 0,550   | 0,012 |
| 0,673 | 0,003 | Glycerol-3-phosphate dehydrogenase inhibitor        | 0,561   | 0,024 |
| 0,672 | 0,003 | Serine 3-dehydrogenase inhibitor                    | 0,554   | 0,017 |

|       |       |                                                        |       |       |
|-------|-------|--------------------------------------------------------|-------|-------|
| 0,670 | 0,002 | Acetylenecarboxylate hydratase inhibitor               | 0,541 | 0,004 |
| 0,686 | 0,018 | Venombin AB inhibitor                                  | 0,541 | 0,005 |
| 0,669 | 0,002 | D-2-hydroxy-acid dehydrogenase inhibitor               | 0,546 | 0,012 |
| 0,676 | 0,010 | Adenomatous polyposis treatment                        | 0,550 | 0,016 |
| 0,671 | 0,005 | Glyoxylate reductase (NADP+) inhibitor                 | 0,553 | 0,019 |
| 0,665 | 0,002 | Prepilin peptidase inhibitor                           | 0,539 | 0,005 |
| 0,665 | 0,002 | Haloacetate dehalogenase inhibitor                     | 0,534 | 0,003 |
| 0,667 | 0,004 | Sulfur dioxygenase inhibitor                           | 0,535 | 0,006 |
| 0,667 | 0,005 | Phosphatidylcholine-sterol O-acyltransferase inhibitor | 0,566 | 0,037 |
| 0,665 | 0,003 | Nitrile hydratase inhibitor                            | 0,545 | 0,017 |
| 0,662 | 0,001 | 4-Hydroxybenzoate 1-hydroxylase inhibitor              | 0,533 | 0,006 |
| 0,664 | 0,003 | Oxalate oxidase inhibitor                              | 0,538 | 0,011 |
| 0,663 | 0,003 | Mandelate 4-monooxygenase inhibitor                    | 0,532 | 0,006 |
| 0,669 | 0,011 | Cholesterol antagonist                                 | 0,536 | 0,010 |
| 0,675 | 0,017 | Macrophage colony stimulating factor agonist           | 0,530 | 0,005 |
| 0,658 | 0,002 | Alpha-glucuronidase inhibitor                          | 0,554 | 0,029 |
| 0,680 | 0,025 | Ompin inhibitor                                        | 0,536 | 0,012 |
| 0,660 | 0,005 | D-threo-aldose 1-dehydrogenase inhibitor               | 0,546 | 0,022 |
| 0,671 | 0,017 | Cl--transporting ATPase inhibitor                      | 0,528 | 0,004 |
| 0,656 | 0,002 | Iodide peroxidase inhibitor                            | 0,527 | 0,003 |
| 0,658 | 0,005 | Horrilysin inhibitor                                   | 0,547 | 0,023 |
| 0,655 | 0,002 | Ribitol 2-dehydrogenase inhibitor                      | 0,547 | 0,024 |
| 0,656 | 0,003 | Acetoin dehydrogenase inhibitor                        | 0,531 | 0,008 |
| 0,654 | 0,002 | L-galactonolactone oxidase inhibitor                   | 0,538 | 0,016 |
| 0,653 | 0,002 | Diisopropyl-fluorophosphatase inhibitor                | 0,543 | 0,021 |
| 0,661 | 0,011 | Antihypoxic                                            | 0,528 | 0,007 |
| 0,654 | 0,006 | Histamine release inhibitor                            | 0,546 | 0,024 |
| 0,702 | 0,055 | Gluconate 2-dehydrogenase (acceptor) inhibitor         | 0,551 | 0,029 |
| 0,649 | 0,002 | Carboxymethylenebutenolidase inhibitor                 | 0,593 | 0,071 |
| 0,659 | 0,012 | Glucan 1,4-alpha-maltotriohydrolase inhibitor          | 0,525 | 0,004 |
| 0,651 | 0,004 | Mediator release inhibitor                             | 0,548 | 0,029 |
| 0,650 | 0,003 | (R,R)-butanediol dehydrogenase inhibitor               | 0,543 | 0,024 |
| 0,654 | 0,009 | Antiviral (Influenza)                                  | 0,574 | 0,056 |
| 0,649 | 0,004 | Arylformamidase inhibitor                              | 0,532 | 0,014 |
| 0,648 | 0,003 | Indolepyruvate C-methyltransferase inhibitor           | 0,526 | 0,009 |
| 0,652 | 0,007 | Hydroxylamine oxidase inhibitor                        | 0,520 | 0,003 |
| 0,648 | 0,003 | Formate-dihydrofolate ligase inhibitor                 | 0,520 | 0,004 |
| 0,671 | 0,027 | GST A substrate                                        | 0,539 | 0,024 |
| 0,647 | 0,003 | Valine dehydrogenase (NADP+) inhibitor                 | 0,528 | 0,013 |
| 0,650 | 0,005 | Methanol dehydrogenase inhibitor                       | 0,529 | 0,015 |
| 0,646 | 0,003 | Cytochrome-c3 hydrogenase inhibitor                    | 0,520 | 0,006 |
| 0,646 | 0,003 | Hydroxymethylbilane synthase inhibitor                 | 0,528 | 0,017 |
| 0,648 | 0,005 | 4-Hydroxybenzoate nonaprenyltransferase inhibitor      | 0,514 | 0,004 |
| 0,644 | 0,004 | Ferredoxin hydrogenase inhibitor                       | 0,519 | 0,009 |
| 0,645 | 0,005 | Nitrate reductase inhibitor                            | 0,517 | 0,007 |
| 0,639 | 0,002 | 4-Hydroxybenzoate-CoA ligase inhibitor                 | 0,514 | 0,005 |
| 0,641 | 0,003 | N-Carbamoyl-D-amino acid hydrolase inhibitor           | 0,516 | 0,007 |

|       |       |                                                            |         |       |
|-------|-------|------------------------------------------------------------|---------|-------|
| 0,640 | 0,003 | Antiinflammatory, intestinal                               | 0,554   | 0,045 |
| 0,639 | 0,002 | D-lactate dehydrogenase (cytochrome) inhibitor             | 0,519   | 0,011 |
| 0,662 | 0,026 | Protein-disulfide reductase (glutathione) inhibitor        | 0,517   | 0,009 |
| 0,639 | 0,003 | Creatinase inhibitor                                       | 0,513   | 0,005 |
| 0,636 | 0,003 | N-methyl-2-oxoglutaramate hydrolase inhibitor              | 0,512   | 0,005 |
| 0,636 | 0,003 | Tryptophan transaminase inhibitor                          | 0,525   | 0,019 |
| 0,634 | 0,002 | Isoquinoline 1-oxidoreductase inhibitor                    | 0,528   | 0,023 |
| 0,636 | 0,005 | Thromboxane B2 antagonist                                  | 0,511   | 0,005 |
| 0,639 | 0,008 | Choline-phosphate cytidyltransferase inhibitor             | 0,540   | 0,035 |
| 0,641 | 0,010 | Eye irritation, inactive                                   | 0,549   | 0,044 |
| 0,637 | 0,006 | Adenylyl-sulfate reductase inhibitor                       | 0,512   | 0,007 |
| 0,643 | 0,013 | Alopecia treatment                                         | 0,518   | 0,013 |
| 0,632 | 0,003 | 15-Hydroxyprostaglandin-D dehydrogenase (NADP+) inhib      | 0,508   | 0,004 |
| 0,633 | 0,004 | Cyclic AMP agonist                                         | 0,509   | 0,005 |
| 0,631 | 0,003 | NAD+ synthase (glutamine-hydrolysing) inhibitor            | 7 0,538 | 0,034 |
| 0,645 | 0,016 | Lipid metabolism regulator                                 | 0,525   | 0,022 |
| 0,632 | 0,003 | Alpha-N-arabinofuranosidase inhibitor                      | 0,568   | 0,064 |
| 0,632 | 0,004 | 2,3,4,5-Tetrahydropyridine-2,6-dicarboxylate N-succinyltr: | 0,512   | 0,009 |
| 0,662 | 0,034 | Nicotinic alpha2beta2 receptor antagonist                  | 0,505   | 0,003 |
| 0,633 | 0,006 | Venom exonuclease inhibitor                                | 0,511   | 0,009 |
| 0,637 | 0,011 | MAP kinase stimulant                                       | 0,506   | 0,005 |
| 0,628 | 0,003 | Ferrochelataze inhibitor                                   | 0,547   | 0,048 |
| 0,628 | 0,003 | L-3-cyanoalanine synthase inhibitor                        | 0,507   | 0,009 |
| 0,632 | 0,007 | Acylaminoacyl-peptidase inhibitor                          | 0,515   | 0,017 |
| 0,632 | 0,007 | Tetrahydroxynaphthalene reductase inhibitor                | 0,512   | 0,016 |
| 0,629 | 0,005 | Glucose 1-dehydrogenase inhibitor                          | 0,523   | 0,027 |
| 0,625 | 0,002 | Cysteine-S-conjugate beta-lyase inhibitor                  | 0,506   | 0,010 |
| 0,627 | 0,004 | Dihydrodipicolinate reductase inhibitor                    | 0,520   | 0,025 |
| 0,625 | 0,005 | Malate oxidase inhibitor                                   | 0,498   | 0,004 |
| 0,623 | 0,003 | 4-Alpha-glucanotransferase inhibitor                       | 0,514   | 0,020 |
| 0,627 | 0,007 | Di-trans,poly-cis-decaprenylcistransferase inhibitor       | 0,498   | 0,004 |
| 0,622 | 0,003 | Succinate-semialdehyde dehydrogenase inhibitor             | 0,497   | 0,005 |
| 0,621 | 0,002 | L-ascorbate peroxidase inhibitor                           | 0,515   | 0,023 |
| 0,640 | 0,022 | Peptidyl-dipeptidase Dcp inhibitor                         | 0,494   | 0,004 |
| 0,626 | 0,007 | GABA aminotransferase inhibitor                            | 0,499   | 0,009 |
| 0,623 | 0,005 | 2-Hydroxy-3-oxoadipate synthase inhibitor                  | 0,512   | 0,022 |
| 0,627 | 0,010 | Phosphatidate phosphatase inhibitor                        | 0,495   | 0,005 |
| 0,621 | 0,004 | Loop diuretic                                              | 0,535   | 0,046 |
| 0,627 | 0,010 | Alcohol O-acetyltransferase inhibitor                      | 0,494   | 0,005 |
| 0,623 | 0,007 | Platelet adhesion inhibitor                                | 0,528   | 0,039 |
| 0,623 | 0,008 | Nitrite reductase (NO-forming) inhibitor                   | 0,504   | 0,016 |
| 0,621 | 0,006 | Carboxypeptidase D inhibitor                               | 0,491   | 0,004 |
| 0,625 | 0,010 | Beta glucuronidase inhibitor                               | 0,490   | 0,002 |
| 0,618 | 0,004 | Histone acetyltransferase inhibitor                        | 0,491   | 0,004 |
| 0,643 | 0,029 | Phosphatase inhibitor                                      | 0,519   | 0,033 |
| 0,633 | 0,021 | Fucosterol-epoxide lyase inhibitor                         | 0,495   | 0,009 |
| 0,616 | 0,004 | Acid phosphatase inhibitor                                 | 0,505   | 0,019 |

|       |       |                                                               |       |       |
|-------|-------|---------------------------------------------------------------|-------|-------|
| 0,632 | 0,021 | Muramoyltetrapeptide carboxypeptidase inhibitor               | 0,495 | 0,009 |
| 0,618 | 0,008 | Aspergillus nuclease S1 inhibitor                             | 0,496 | 0,011 |
| 0,612 | 0,002 | Protein-glucosylgalactosylhydroxylysine glucosidase inhibitor | 0,494 | 0,009 |
| 0,615 | 0,005 | Glycerol dehydrogenase inhibitor                              | 0,495 | 0,010 |
| 0,614 | 0,004 | Lactate 2-monooxygenase inhibitor                             | 0,489 | 0,005 |
| 0,616 | 0,006 | Phosphopantothenoilcysteine decarboxylase inhibitor           | 0,494 | 0,010 |
| 0,618 | 0,009 | Shikimate O-hydroxycinnamoyltransferase inhibitor             | 0,486 | 0,002 |
| 0,611 | 0,002 | DOPA decarboxylase inhibitor                                  | 0,488 | 0,005 |
| 0,620 | 0,011 | Chitinase inhibitor                                           | 0,507 | 0,024 |
| 0,611 | 0,003 | Aspartate-tRNA ligase inhibitor                               | 0,497 | 0,015 |
| 0,612 | 0,004 | Ubiquitin thiolesterase inhibitor                             | 0,488 | 0,006 |
| 0,609 | 0,001 | Phenylalanine decarboxylase inhibitor                         | 0,491 | 0,011 |
| 0,610 | 0,003 | Aspartoacylase inhibitor                                      | 0,483 | 0,004 |
| 0,657 | 0,050 | Polyporopepsin inhibitor                                      | 0,481 | 0,004 |
| 0,609 | 0,003 | Aldehyde ferredoxin oxidoreductase inhibitor                  | 0,486 | 0,009 |
| 0,620 | 0,014 | Radioprotector                                                | 0,487 | 0,009 |
| 0,618 | 0,013 | UGT1A substrate                                               | 0,483 | 0,006 |
| 0,615 | 0,010 | 5 Hydroxytryptamine release inhibitor                         | 0,485 | 0,008 |
| 0,607 | 0,002 | Homogentisate 1,2-dioxygenase inhibitor                       | 0,481 | 0,005 |
| 0,608 | 0,002 | Mandelate racemase inhibitor                                  | 0,481 | 0,005 |
| 0,608 | 0,003 | Valine decarboxylase inhibitor                                | 0,479 | 0,004 |
| 0,608 | 0,004 | Antiuremic                                                    | 0,488 | 0,012 |
| 0,614 | 0,011 | Reductant                                                     | 0,486 | 0,012 |
| 0,605 | 0,003 | Endo-1,4-beta-xylanase inhibitor                              | 0,477 | 0,003 |
| 0,605 | 0,004 | Trimethylamine dehydrogenase inhibitor                        | 0,477 | 0,003 |
| 0,604 | 0,003 | Tyrosine-ester sulfotransferase inhibitor                     | 0,480 | 0,007 |
| 0,605 | 0,004 | Glucosamine-6-phosphate deaminase inhibitor                   | 0,509 | 0,036 |
| 0,605 | 0,005 | Acaricide                                                     | 0,475 | 0,002 |
| 0,614 | 0,014 | MMP9 expression inhibitor                                     | 0,490 | 0,018 |
| 0,612 | 0,013 | Cardiovascular analeptic                                      | 0,492 | 0,021 |
| 0,605 | 0,006 | Gingipain K inhibitor                                         | 0,493 | 0,023 |
| 0,617 | 0,019 | Oxygen scavenger                                              | 0,479 | 0,008 |
| 0,601 | 0,003 | N-acetyllactosamine synthase inhibitor                        | 0,481 | 0,011 |
| 0,601 | 0,003 | Deoxyribose-phosphate aldolase inhibitor                      | 0,474 | 0,004 |
| 0,599 | 0,002 | Deoxyribonuclease (pyrimidine dimer) inhibitor                | 0,494 | 0,024 |
| 0,602 | 0,005 | Aminoacylase inhibitor                                        | 0,479 | 0,009 |
| 0,598 | 0,002 | Erythro-3-hydroxyaspartate ammonia-lyase inhibitor            | 0,507 | 0,038 |
| 0,601 | 0,004 | Guanidinoacetate N-methyltransferase inhibitor                | 0,474 | 0,005 |
| 0,611 | 0,016 | Fibrolase inhibitor                                           | 0,472 | 0,004 |
| 0,600 | 0,005 | FMO1 substrate                                                | 0,477 | 0,009 |
| 0,597 | 0,003 | Fumarate reductase (NADH) inhibitor                           | 0,474 | 0,007 |
| 0,612 | 0,020 | Calcium channel (voltage-sensitive) activator                 | 0,509 | 0,042 |
| 0,595 | 0,005 | 4-Chlorobenzoyl-CoA dehalogenase inhibitor                    | 0,482 | 0,015 |
| 0,597 | 0,006 | Snopalysin inhibitor                                          | 0,489 | 0,022 |
| 0,594 | 0,004 | Glutamate-tRNA ligase inhibitor                               | 0,470 | 0,004 |
| 0,591 | 0,003 | Bile-salt sulfotransferase inhibitor                          | 0,469 | 0,003 |
| 0,591 | 0,003 | Phosphoenolpyruvate carboxykinase (diphosphate) inhibitor     | 0,475 | 0,010 |



|       |       |                                                           |               |       |       |
|-------|-------|-----------------------------------------------------------|---------------|-------|-------|
| 0,591 | 0,003 | Xaa-Pro dipeptidyl-peptidase inhibitor                    | 0,524         | 0,060 |       |
| 0,591 | 0,004 | Glycine amidinotransferase inhibitor                      | 0,515         | 0,052 |       |
| 0,591 | 0,005 | Guanidinoacetate kinase inhibitor                         | 0,467         | 0,003 |       |
| 3     | 0,597 | 0,010                                                     | Antimutagenic | 0,471 | 0,009 |
| 0,588 | 0,001 | Deoxyhypusine monooxygenase inhibitor                     | 0,467         | 0,004 |       |
| 0,593 | 0,007 | Meprin B inhibitor                                        | 0,467         | 0,005 |       |
| 0,604 | 0,018 | Nucleotide metabolism regulator                           | 0,466         | 0,005 |       |
| 0,588 | 0,004 | Galacturan 1,4-alpha-galacturonidase inhibitor            | 0,475         | 0,014 |       |
| 0,587 | 0,003 | Iduronate-2-sulfatase inhibitor                           | 0,475         | 0,014 |       |
| 0,602 | 0,019 | Nucleoside oxidase (H2O2-forming) inhibitor               | 0,473         | 0,013 |       |
| 0,597 | 0,013 | AR expression inhibitor                                   | 0,475         | 0,016 |       |
| 0,602 | 0,019 | NAD(P)+-arginine ADP-ribosyltransferase inhibitor         | 0,527         | 0,068 |       |
| 0,589 | 0,006 | Trans-1,2-dihydrobenzene-1,2-diol dehydrogenase inhibitor | 0,462         | 0,004 |       |
| 0,587 | 0,005 | Linoleoyl-CoA desaturase inhibitor                        | 0,483         | 0,025 |       |
| 0,585 | 0,003 | Glutamate-1-semialdehyde 2,1-aminomutase inhibitor        | 0,487         | 0,029 |       |
| 0,586 | 0,005 | Sedoheptulose-bisphosphatase inhibitor                    | 0,467         | 0,009 |       |
| 0,585 | 0,003 | Orotate reductase (NADH) inhibitor                        | 0,476         | 0,019 |       |
| 0,585 | 0,005 | 4-Hydroxymandelate oxidase inhibitor                      | 0,465         | 0,008 |       |
| 0,589 | 0,010 | Histamine release stimulant                               | 0,509         | 0,052 |       |
| 0,582 | 0,003 | N-acetylneuraminase lyase inhibitor                       | 0,461         | 0,005 |       |
| 0,580 | 0,002 | 2-Oxoisovalerate dehydrogenase (acylating) inhibitor      | 0,464         | 0,008 |       |
| 0,588 | 0,010 | UGT2B12 substrate                                         | 0,506         | 0,051 |       |
| 0,592 | 0,014 | CYP2A4 substrate                                          | 0,485         | 0,030 |       |
| 0,583 | 0,006 | Ferredoxin-NADP+ reductase inhibitor                      | 0,487         | 0,032 |       |
| 0,592 | 0,015 | IgA-specific metalloendopeptidase inhibitor               | 0,503         | 0,049 |       |
| 0,579 | 0,003 | Farnesyltransferase inhibitor                             | 0,464         | 0,010 |       |
| 0,581 | 0,005 | Catalase inhibitor                                        | 0,461         | 0,008 |       |
| 0,579 | 0,004 | Metalloprotease D inhibitor                               | 0,460         | 0,007 |       |
| 0,599 | 0,025 | Platelet aggregation stimulant                            | 0,476         | 0,024 |       |
| 0,576 | 0,002 | D-cysteine desulfhydrase inhibitor                        | 0,460         | 0,008 |       |
| 0,609 | 0,036 | Antidyskinetic                                            | 0,466         | 0,014 |       |
| 0,580 | 0,008 | Glutathione peroxidase inhibitor                          | 0,460         | 0,009 |       |
| 0,575 | 0,003 | Deacetoxycephalosporin-C synthase inhibitor               | 0,486         | 0,035 |       |
| 0,576 | 0,004 | Antimyopathies                                            | 0,453         | 0,003 |       |
| 0,577 | 0,006 | 3'-Nucleotidase inhibitor                                 | 0,457         | 0,007 |       |
| 0,574 | 0,003 | Thiamine pyridinylase inhibitor                           | 0,458         | 0,008 |       |
| 0,576 | 0,005 | Formate dehydrogenase inhibitor                           | 0,454         | 0,004 |       |
| 0,573 | 0,003 | Choline dehydrogenase inhibitor                           | 0,489         | 0,040 |       |
| 0,575 | 0,005 | Gamma-glutamyltransferase inhibitor                       | 0,453         | 0,004 |       |
| 0,573 | 0,004 | Carboxylesterase inhibitor                                | 0,463         | 0,014 |       |
| 0,571 | 0,002 | Guanidinodeoxy-scyllo-inositol-4-phosphatase inhibitor    | 0,459         | 0,011 |       |
| 0,571 | 0,002 | Imidazoleacetate 4-monooxygenase inhibitor                | 0,482         | 0,034 |       |
| 0,575 | 0,006 | Indanol dehydrogenase inhibitor                           | 0,455         | 0,008 |       |
| 0,572 | 0,003 | Acetolactate decarboxylase inhibitor                      | 0,461         | 0,015 |       |
| 0,575 | 0,009 | UGT1A1 substrate                                          | 0,461         | 0,015 |       |
| 0,568 | 0,003 | 3-Oxosteroid 1-dehydrogenase inhibitor                    | 0,454         | 0,009 |       |
| 0,568 | 0,003 | Oxaloacetate decarboxylase inhibitor                      | 0,509         | 0,065 |       |

|         |       |                                                           |       |       |
|---------|-------|-----------------------------------------------------------|-------|-------|
| 0,566   | 0,002 | Pyridoxine 5-dehydrogenase inhibitor                      | 0,446 | 0,003 |
| 0,569   | 0,005 | Phosphoenolpyruvate mutase inhibitor                      | 0,450 | 0,008 |
| 0,569   | 0,005 | Acylglycerone-phosphate reductase inhibitor               | 0,454 | 0,013 |
| 4 0,570 | 0,007 | Free radical scavenger                                    | 0,447 | 0,006 |
| 0,563   | 0,002 | Pyridoxine 4-oxidase inhibitor                            | 0,443 | 0,003 |
| 0,566   | 0,005 | Para amino benzoic acid antagonist                        | 0,451 | 0,011 |
| 0,568   | 0,008 | Antipyretic                                               | 0,498 | 0,058 |
| 0,562   | 0,003 | Alkylglycerophosphoethanolamine phosphodiesterase inh     | 0,447 | 0,009 |
| 0,582   | 0,023 | Antiviral (Picornavirus)                                  | 0,499 | 0,061 |
| 0,565   | 0,007 | CDP-diacylglycerol-serine O-phosphatidyltransferase inhib | 0,446 | 0,009 |
| 0,574   | 0,016 | Sulfur reductase inhibitor                                | 0,451 | 0,014 |
| 0,571   | 0,014 | Antipsoriatic                                             | 0,441 | 0,004 |
| 0,563   | 0,005 | Inorganic diphosphatase inhibitor                         | 0,468 | 0,032 |
| 0,561   | 0,004 | Cellulase inhibitor                                       | 0,439 | 0,004 |
| 0,560   | 0,002 | Carnitine dehydratase inhibitor                           | 0,472 | 0,036 |
| 0,560   | 0,003 | Asparagine-tRNA ligase inhibitor                          | 0,466 | 0,032 |
| 0,560   | 0,003 | Formaldehyde dehydrogenase inhibitor                      | 0,437 | 0,003 |
| 0,559   | 0,002 | Gluconate dehydratase inhibitor                           | 0,452 | 0,018 |
| 0,564   | 0,007 | Malate dehydrogenase inhibitor                            | 0,437 | 0,003 |
| 0,568   | 0,011 | Peptidoglycan glycosyltransferase inhibitor               | 0,437 | 0,004 |
| 0,558   | 0,002 | Aldehyde dehydrogenase [NAD(P)+] inhibitor                | 0,463 | 0,031 |
| 0,565   | 0,010 | UGT2B substrate                                           | 0,476 | 0,044 |
| 0,575   | 0,020 | (S)-6-hydroxynicotine oxidase inhibitor                   | 0,467 | 0,035 |
| 0,562   | 0,008 | Alpha-Methylacyl-CoA racemase inhibitor                   | 0,434 | 0,003 |
| 0,576   | 0,023 | Leukopoiesis stimulant                                    | 0,435 | 0,004 |
| 0,555   | 0,003 | D-lactate dehydrogenase inhibitor                         | 0,444 | 0,014 |
| 0,576   | 0,024 | Endopeptidase So inhibitor                                | 0,436 | 0,007 |
| 0,574   | 0,022 | Radiosensitizer                                           | 0,434 | 0,005 |
| 0,554   | 0,002 | L-lactate dehydrogenase (cytochrome) inhibitor            | 0,435 | 0,006 |
| 0,557   | 0,006 | Endo-1,3(4)-beta-glucanase inhibitor                      | 0,464 | 0,036 |
| 0,554   | 0,003 | Alpha-pinene-oxide decyclase inhibitor                    | 0,497 | 0,069 |
| 0,566   | 0,015 | Thiol oxidase inhibitor                                   | 0,466 | 0,039 |
| 0,554   | 0,003 | Xylose isomerase inhibitor                                | 0,432 | 0,006 |
| 0,554   | 0,004 | Glycogen synthase stimulant                               | 0,433 | 0,008 |
| 0,557   | 0,007 | Choline kinase inhibitor                                  | 0,426 | 0,002 |
| 0,554   | 0,005 | Morphine 6-dehydrogenase inhibitor                        | 0,470 | 0,045 |
| 0,554   | 0,006 | Phosphoenolpyruvate-protein phosphotransferase inhibiti   | 0,458 | 0,034 |
| 0,567   | 0,018 | Insulin promoter                                          | 0,443 | 0,018 |
| 0,555   | 0,008 | Mitochondrial intermediate peptidase inhibitor            | 0,430 | 0,005 |
| 0,549   | 0,002 | L-fuconate dehydratase inhibitor                          | 0,427 | 0,003 |
| 0,553   | 0,007 | Inositol oxygenase inhibitor                              | 0,431 | 0,006 |
| 0,548   | 0,003 | Cerebroside-sulfatase inhibitor                           | 0,428 | 0,004 |
| 0,548   | 0,003 | Carnitine 3-dehydrogenase inhibitor                       | 0,463 | 0,040 |
| 0,550   | 0,005 | RELA expression inhibitor                                 | 0,443 | 0,021 |
| 0,552   | 0,007 | CDP-diacylglycerol-glycerol-3-phosphate 3-phosphatidyltr  | 0,472 | 0,050 |
| 0,546   | 0,002 | 5-Oxoprolinase (ATP-hydrolysing) inhibitor                | 0,426 | 0,004 |
| 0,545   | 0,002 | Selectin L antagonist                                     | 0,435 | 0,013 |

|   |       |       |                                                                     |       |       |
|---|-------|-------|---------------------------------------------------------------------|-------|-------|
|   | 0,546 | 0,004 | Omega-amidase inhibitor                                             | 0,431 | 0,010 |
| 5 | 0,554 | 0,012 | Lipid peroxidase inhibitor                                          | 0,435 | 0,014 |
|   | 0,560 | 0,018 | TNF expression inhibitor                                            | 0,442 | 0,021 |
|   | 0,563 | 0,021 | CYP2D16 substrate                                                   | 0,427 | 0,006 |
|   | 0,549 | 0,007 | ATP phosphoribosyltransferase inhibitor                             | 0,441 | 0,021 |
|   | 0,550 | 0,008 | GST M substrate                                                     | 0,434 | 0,015 |
|   | 0,556 | 0,014 | 5 Hydroxytryptamine uptake stimulant                                | 0,438 | 0,019 |
|   | 0,552 | 0,011 | 1-Acylglycerol-3-phosphate O-acyltransferase inhibitor              | 0,424 | 0,004 |
|   | 0,544 | 0,003 | Retinal dehydrogenase inhibitor                                     | 0,427 | 0,008 |
|   | 0,545 | 0,005 | Leukotriene-C4 synthase inhibitor                                   | 0,457 | 0,039 |
|   | 0,550 | 0,010 | 3'-Demethylstaurosporine O-methyltransferase inhibitor              | 0,423 | 0,004 |
|   | 0,565 | 0,025 | Vasoprotector                                                       | 0,426 | 0,008 |
|   | 0,549 | 0,010 | Undecaprenyldiphospho-muramoylpentapeptide beta-N- $\epsilon$       | 0,426 | 0,008 |
|   | 0,548 | 0,009 | Anti-amyloidogenic                                                  | 0,427 | 0,010 |
|   | 0,550 | 0,012 | CYP4A11 substrate                                                   | 0,423 | 0,007 |
|   | 0,539 | 0,002 | Malonate-semialdehyde dehydrogenase inhibitor                       | 0,442 | 0,026 |
|   | 0,541 | 0,004 | Prunasin beta-glucosidase inhibitor                                 | 0,437 | 0,022 |
|   | 0,545 | 0,009 | Diamine N-acetyltransferase inhibitor                               | 0,433 | 0,018 |
|   | 0,539 | 0,003 | Glucan 1,3-beta-glucosidase inhibitor                               | 0,419 | 0,004 |
|   | 0,540 | 0,004 | TRPA1 agonist                                                       | 0,460 | 0,046 |
|   | 0,538 | 0,003 | HIV-1 integrase (3'-Processing) inhibitor                           | 0,455 | 0,041 |
|   | 0,537 | 0,003 | Blasticidin-S deaminase inhibitor                                   | 0,439 | 0,026 |
|   | 0,537 | 0,004 | [acyl-carrier-protein] S-acetyltransferase inhibitor                | 0,428 | 0,015 |
|   | 0,541 | 0,008 | Gamma-D-Glutamyl-meso-diaminopimelate peptidase inh                 | 0,421 | 0,009 |
|   | 0,538 | 0,005 | Glutamate dehydrogenase [NAD(P)+] inhibitor                         | 0,415 | 0,003 |
|   | 0,565 | 0,033 | Chloride peroxidase inhibitor                                       | 0,450 | 0,039 |
| 6 | 0,562 | 0,031 | Apoptosis agonist                                                   | 0,416 | 0,005 |
|   | 0,532 | 0,002 | DNA-3-methyladenine glycosylase II inhibitor                        | 0,415 | 0,004 |
|   | 0,543 | 0,013 | Acetylgalactosaminyl-O-glycosyl-glycoprotein beta-1,3-N- $\epsilon$ | 0,417 | 0,007 |
|   | 0,532 | 0,003 | Diaminopimelate dehydrogenase inhibitor                             | 0,450 | 0,041 |
|   | 0,531 | 0,003 | Xylan 1,4-beta-xylosidase inhibitor                                 | 0,411 | 0,002 |
|   | 0,532 | 0,004 | Choline-sulfatase inhibitor                                         | 0,412 | 0,003 |
|   | 0,530 | 0,003 | 1,5-Anhydro-D-fructose reductase inhibitor                          | 0,414 | 0,005 |
|   | 0,534 | 0,007 | Choleretic                                                          | 0,417 | 0,008 |
|   | 0,542 | 0,016 | Apyrase inhibitor                                                   | 0,412 | 0,004 |
|   | 0,530 | 0,004 | Glutamate 5-kinase inhibitor                                        | 0,432 | 0,024 |
|   | 0,528 | 0,003 | Lactaldehyde reductase (NADPH) inhibitor                            | 0,415 | 0,008 |
|   | 0,559 | 0,034 | 27-Hydroxycholesterol 7alpha-monooxygenase inhibitor                | 0,412 | 0,004 |
|   | 0,527 | 0,003 | Glutamin-(asparagin-)ase inhibitor                                  | 0,412 | 0,005 |
|   | 0,546 | 0,023 | Dermatologic                                                        | 0,413 | 0,006 |
|   | 0,538 | 0,016 | Dolichyl-diphosphooligosaccharide-protein glycotransfera            | 0,420 | 0,013 |
|   | 0,526 | 0,004 | Undecaprenyl-diphosphatase inhibitor                                | 0,431 | 0,024 |
|   | 0,523 | 0,002 | Dichloromuconate cycloisomerase inhibitor                           | 0,417 | 0,010 |
|   | 0,524 | 0,003 | Saccharopine dehydrogenase (NADP+, L-glutamate-formir               | 0,439 | 0,033 |
|   | 0,521 | 0,001 | Tannase inhibitor                                                   | 0,439 | 0,033 |
|   | 0,527 | 0,007 | CYP19A1 expression inhibitor                                        | 0,409 | 0,003 |
|   | 0,522 | 0,002 | Leucine transaminase inhibitor                                      | 0,410 | 0,004 |

|       |       |                                                       |                               |       |       |
|-------|-------|-------------------------------------------------------|-------------------------------|-------|-------|
| 0,539 | 0,019 | Antinociceptive                                       | 0,413                         | 0,007 |       |
| 0,542 | 0,022 | CYP2F1 substrate                                      | 0,458                         | 0,053 |       |
| 0,524 | 0,005 | Sweetener                                             | 0,407                         | 0,003 |       |
| 0,548 | 0,029 | Pin1 inhibitor                                        | 0,420                         | 0,016 |       |
| 0,527 | 0,008 | Aminopeptidase Y inhibitor                            | 0,429                         | 0,026 |       |
| 0,522 | 0,005 | Alpha-amylase inhibitor                               | 0,407                         | 0,004 |       |
| 0,522 | 0,005 | Antiviral (Adenovirus)                                | 0,452                         | 0,050 |       |
| 0,520 | 0,003 | 3-Isopropylmalate dehydrogenase inhibitor             | 0,448                         | 0,045 |       |
| 0,524 | 0,008 | CYP2A5 substrate                                      | 0,407                         | 0,005 |       |
| 0,525 | 0,009 | Glycerol-3-phosphate oxidase inhibitor                | 0,408                         | 0,006 |       |
| 0,520 | 0,005 | tRNA adenylyltransferase inhibitor                    | 0,410                         | 0,008 |       |
| 0,518 | 0,003 | (S)-3-amino-2-methylpropionate transaminase inhibitor | 0,409                         | 0,007 |       |
| 0,519 | 0,005 | N-acetylneuraminate 4-O-acetyltransferase inhibitor   | 0,421                         | 0,019 |       |
| 7     | 0,520 | 0,006                                                 | Antioxidant                   | 0,411 | 0,010 |
| 0,517 | 0,003 | Iron-cytochrome-c reductase inhibitor                 | 0,439                         | 0,038 |       |
| 0,517 | 0,003 | Tauropine dehydrogenase inhibitor                     | 0,410                         | 0,011 |       |
| 0,517 | 0,004 | Aryl-aldehyde dehydrogenase (NADP+) inhibitor         | 0,432                         | 0,033 |       |
| 0,514 | 0,002 | Haloalkane dehalogenase inhibitor                     | 0,409                         | 0,011 |       |
| 0,538 | 0,026 | Antipruritic, allergic                                | 0,415                         | 0,018 |       |
| 0,513 | 0,003 | Galactose 1-dehydrogenase (NADP+) inhibitor           | 0,418                         | 0,021 |       |
| 0,513 | 0,003 | Beta-alanine-pyruvate transaminase inhibitor          | 0,429                         | 0,032 |       |
| 0,514 | 0,004 | Sulfate adenylyltransferase (ADP) inhibitor           | 0,402                         | 0,005 |       |
| 0,557 | 0,047 | Proteasome ATPase inhibitor                           | 0,406                         | 0,010 |       |
| 0,524 | 0,015 | Leukopoiesis inhibitor                                | 0,433                         | 0,038 |       |
| 8     | 0,543 | 0,035                                                 | Membrane integrity antagonist | 0,398 | 0,003 |
| 0,515 | 0,007 | Acetate-CoA ligase inhibitor                          | 0,428                         | 0,033 |       |
| 0,516 | 0,008 | Glycine-tRNA ligase inhibitor                         | 0,411                         | 0,017 |       |
| 0,512 | 0,005 | Rhodotorulapepsin inhibitor                           | 0,414                         | 0,020 |       |
| 0,521 | 0,014 | Muscular dystrophy treatment                          | 0,449                         | 0,056 |       |
| 0,510 | 0,004 | Phosphoinositide phospholipase C inhibitor            | 0,433                         | 0,040 |       |
| 0,509 | 0,004 | NADPH oxidase inhibitor                               | 0,400                         | 0,007 |       |
| 0,515 | 0,011 | Sorbitol-6-phosphate 2-dehydrogenase inhibitor        | 0,398                         | 0,006 |       |
| 0,512 | 0,008 | UGT1A10 substrate                                     | 0,402                         | 0,010 |       |
| 0,548 | 0,044 | Antiinflammatory                                      | 0,405                         | 0,013 |       |
| 0,536 | 0,032 | CYP2C9 substrate                                      | 0,400                         | 0,008 |       |
| 0,507 | 0,003 | Pim-1 kinase inhibitor                                | 0,397                         | 0,005 |       |
| 0,505 | 0,002 | Diiodotyrosine transaminase inhibitor                 | 0,397                         | 0,005 |       |
| 0,530 | 0,027 | Analeptic                                             | 8 0,403                       | 0,012 |       |
| 0,505 | 0,003 | Glycine transaminase inhibitor                        | 0,394                         | 0,004 |       |
| 0,505 | 0,003 | Glutathione-disulfide reductase inhibitor             | 0,441                         | 0,050 |       |
| 0,505 | 0,003 | Propanediol dehydratase inhibitor                     | 0,400                         | 0,009 |       |
| 0,505 | 0,004 | Indole-3-acetaldehyde reductase (NADPH) inhibitor     | 0,446                         | 0,056 |       |
| 0,507 | 0,006 | UGT1A7 substrate                                      | 0,407                         | 0,018 |       |
| 0,506 | 0,005 | NF-E2-related factor 2 stimulant                      | 0,436                         | 0,046 |       |
| 0,530 | 0,030 | Neurotransmitter antagonist                           | 0,408                         | 0,019 |       |
| 0,504 | 0,004 | Diaminopropionate ammonia-lyase inhibitor             | 0,391                         | 0,002 |       |
| 0,519 | 0,020 | Antihypercholesterolemic                              | 0,394                         | 0,006 |       |

|       |       |                                                              |       |       |
|-------|-------|--------------------------------------------------------------|-------|-------|
| 0,502 | 0,003 | Serine-glyoxylate transaminase inhibitor                     | 0,422 | 0,034 |
| 0,499 | 0,002 | Glucosamine-1-phosphate N-acetyltransferase inhibitor        | 0,396 | 0,008 |
| 0,500 | 0,004 | Cystathionine gamma-lyase inhibitor                          | 0,394 | 0,006 |
| 0,501 | 0,006 | Laminaribiose phosphorylase inhibitor                        | 0,394 | 0,008 |
| 0,501 | 0,006 | DNA ligase (ATP) inhibitor                                   | 0,392 | 0,006 |
| 0,501 | 0,006 | Arylamine N-acetyltransferase inhibitor                      | 0,391 | 0,005 |
| 0,534 | 0,040 | Ovulation inhibitor                                          | 0,400 | 0,014 |
| 0,505 | 0,011 | Glycine dehydrogenase (decarboxylating) inhibitor            | 0,427 | 0,041 |
| 0,500 | 0,006 | Galactokinase inhibitor                                      | 0,425 | 0,039 |
| 0,522 | 0,029 | CYP2B5 substrate                                             | 0,399 | 0,014 |
| 0,495 | 0,002 | Sorbose dehydrogenase inhibitor                              | 0,409 | 0,024 |
| 0,516 | 0,023 | Cytostatic                                                   | 0,389 | 0,004 |
| 0,496 | 0,004 | Testosterone 17beta-dehydrogenase inhibitor                  | 0,394 | 0,009 |
| 0,495 | 0,003 | Glucarate dehydratase inhibitor                              | 0,392 | 0,007 |
| 0,513 | 0,022 | Plastoquinol-plastocyanin reductase inhibitor                | 0,413 | 0,029 |
| 0,510 | 0,020 | Alcohol dehydrogenase (acceptor) inhibitor                   | 0,426 | 0,042 |
| 0,492 | 0,002 | Lactaldehyde dehydrogenase inhibitor                         | 0,402 | 0,019 |
| 0,501 | 0,011 | EIF4E expression inhibitor                                   | 0,403 | 0,020 |
| 0,491 | 0,002 | 3-Hydroxyacyl-CoA dehydrogenase inhibitor                    | 0,418 | 0,035 |
| 0,489 | 0,002 | Aspartate racemase inhibitor                                 | 0,395 | 0,012 |
| 0,513 | 0,026 | Histidine kinase inhibitor                                   | 0,431 | 0,049 |
| 0,496 | 0,010 | Vitamin-K-epoxide reductase (warfarin-insensitive) inhibitor | 0,385 | 0,003 |
| 0,490 | 0,004 | Histidine decarboxylase inhibitor                            | 0,385 | 0,003 |
| 0,488 | 0,003 | Cysteine desulfurase inhibitor                               | 0,396 | 0,015 |
| 0,504 | 0,020 | Hepatoprotectant                                             | 0,387 | 0,007 |
| 0,494 | 0,010 | RNA-directed RNA polymerase inhibitor                        | 0,436 | 0,057 |
| 0,502 | 0,019 | CYP2E1 inducer                                               | 0,384 | 0,006 |
| 0,485 | 0,004 | Thiamine-phosphate kinase inhibitor                          | 0,395 | 0,016 |
| 0,520 | 0,039 | CYP2C substrate                                              | 0,383 | 0,005 |
| 0,520 | 0,040 | Vasodilator, peripheral                                      | 0,382 | 0,005 |
| 0,491 | 0,011 | Ethanolaminophosphotransferase inhibitor                     | 0,404 | 0,027 |
| 0,509 | 0,030 | CYP2A6 substrate                                             | 0,379 | 0,003 |
| 0,496 | 0,016 | Membrane permeability enhancer                               | 0,389 | 0,012 |
| 0,485 | 0,006 | Maillard reaction inhibitor                                  | 0,379 | 0,003 |
| 0,481 | 0,003 | Xanthine oxidase inhibitor                                   | 0,382 | 0,006 |
| 0,507 | 0,029 | All-trans-retinyl-palmitate hydrolase inhibitor              | 0,393 | 0,017 |
| 0,490 | 0,012 | CYP4A substrate                                              | 0,381 | 0,006 |
| 0,479 | 0,002 | Muconate cycloisomerase inhibitor                            | 0,380 | 0,005 |
| 0,482 | 0,005 | Betaine-aldehyde dehydrogenase inhibitor                     | 0,386 | 0,011 |
| 0,504 | 0,029 | Antithrombotic                                               | 0,389 | 0,014 |
| 0,480 | 0,005 | Thiosulfate sulfurtransferase inhibitor                      | 0,381 | 0,007 |
| 0,531 | 0,056 | Acetylcholine neuromuscular blocking agent                   | 0,381 | 0,007 |
| 0,493 | 0,019 | Carminative                                                  | 0,400 | 0,026 |
| 0,476 | 0,002 | 6,7-Dihydropteridine reductase inhibitor                     | 0,379 | 0,005 |
| 0,479 | 0,005 | Hyaluronic acid agonist                                      | 0,384 | 0,011 |
| 0,477 | 0,003 | Histidinol dehydrogenase inhibitor                           | 0,377 | 0,004 |
| 0,484 | 0,011 | Mannosyl-glycoprotein endo-beta-N-acetylglucosaminidase      | 0,378 | 0,005 |

|       |       |                                                         |       |       |
|-------|-------|---------------------------------------------------------|-------|-------|
| 0,492 | 0,019 | Caspase 8 stimulant                                     | 0,377 | 0,004 |
| 0,505 | 0,032 | Fibroblast growth factor agonist                        | 0,389 | 0,017 |
| 0,485 | 0,014 | Antituberculosic                                        | 0,399 | 0,028 |
| 0,473 | 0,002 | Mannonate dehydratase inhibitor                         | 0,375 | 0,004 |
| 0,474 | 0,004 | Cellulose 1,4-beta-cellobiosidase inhibitor             | 0,382 | 0,011 |
| 0,502 | 0,032 | CYP2A substrate                                         | 0,378 | 0,008 |
| 0,489 | 0,020 | 2-Haloacid dehalogenase inhibitor                       | 0,380 | 0,011 |
| 0,472 | 0,005 | Antidote                                                | 0,382 | 0,013 |
| 0,471 | 0,005 | Serine-phosphoethanolamine synthase inhibitor           | 0,393 | 0,025 |
| 0,502 | 0,036 | CYP2B6 substrate                                        | 0,372 | 0,003 |
| 0,469 | 0,004 | 3-Deoxy-8-phosphooctulonate synthase inhibitor          | 0,382 | 0,014 |
| 0,469 | 0,004 | Glyceraldehyde-3-phosphate dehydrogenase (phosphoryl:   | 0,376 | 0,008 |
| 0,489 | 0,024 | Pancreatic elastase inhibitor                           | 0,379 | 0,011 |
| 0,470 | 0,006 | Tyrosine 3 hydroxylase inhibitor                        | 0,378 | 0,011 |
| 0,467 | 0,003 | Isoamylase inhibitor                                    | 0,395 | 0,028 |
| 0,471 | 0,008 | Formaldehyde dehydrogenase (glutathione) inhibitor      | 0,375 | 0,008 |
| 0,466 | 0,003 | Proline dehydrogenase inhibitor                         | 0,371 | 0,005 |
| 0,465 | 0,003 | Quinoline-4-carboxylate 2-oxidoreductase inhibitor      | 0,411 | 0,045 |
| 0,467 | 0,005 | Thyroxine 5-deiodinase inhibitor                        | 0,369 | 0,003 |
| 0,467 | 0,007 | Hemostatic                                              | 0,463 | 0,098 |
| 0,473 | 0,013 | Dipeptidase E inhibitor                                 | 0,388 | 0,023 |
| 0,463 | 0,003 | Triose-phosphate isomerase inhibitor                    | 0,369 | 0,004 |
| 0,483 | 0,024 | Enteropeptidase inhibitor                               | 0,369 | 0,005 |
| 0,465 | 0,006 | 1,2-alpha-L-fucosidase inhibitor                        | 0,395 | 0,031 |
| 0,468 | 0,010 | Pediculicide                                            | 0,373 | 0,010 |
| 0,461 | 0,004 | Malate-CoA ligase inhibitor                             | 0,376 | 0,012 |
| 0,460 | 0,003 | Aspartate-ammonia ligase (ADP-forming) inhibitor        | 0,425 | 0,063 |
| 0,467 | 0,010 | Bisphosphoglycerate mutase inhibitor                    | 0,389 | 0,026 |
| 0,467 | 0,009 | Diuretic inhibitor                                      | 0,381 | 0,019 |
| 0,470 | 0,013 | Acidifying agent non gastric                            | 0,441 | 0,079 |
| 0,460 | 0,003 | Sepiapterin reductase inhibitor                         | 0,374 | 0,012 |
| 0,468 | 0,012 | Serine-pyruvate transaminase inhibitor                  | 0,383 | 0,022 |
| 0,468 | 0,013 | Cardioprotectant                                        | 0,376 | 0,015 |
| 0,462 | 0,008 | Serratia marcescens nuclease inhibitor                  | 0,375 | 0,015 |
| 0,493 | 0,040 | CYP3A5 substrate                                        | 0,398 | 0,039 |
| 0,455 | 0,003 | Allophanate hydrolase inhibitor                         | 0,365 | 0,005 |
| 0,453 | 0,001 | Cyclohexadienyl dehydrogenase inhibitor                 | 0,385 | 0,026 |
| 0,455 | 0,004 | Aspartate transaminase inhibitor                        | 0,377 | 0,017 |
| 0,462 | 0,012 | Dolichyl-phosphatase inhibitor                          | 0,364 | 0,005 |
| 0,490 | 0,040 | Respiratory analeptic                                   | 0,363 | 0,005 |
| 0,453 | 0,003 | Dihydropyrimidinase inhibitor                           | 0,362 | 0,004 |
| 0,458 | 0,009 | Glycogen (starch) synthase inhibitor                    | 0,384 | 0,026 |
| 0,455 | 0,005 | Phenylalanine racemase (ATP-hydrolysing) inhibitor      | 0,400 | 0,042 |
| 0,452 | 0,003 | Fumarylacetoacetase inhibitor                           | 0,372 | 0,014 |
| 0,454 | 0,006 | Saccharopine dehydrogenase (NAD+, L-lysine-forming) inh | 0,365 | 0,007 |
| 0,454 | 0,006 | Succinate-CoA ligase (ADP-forming) inhibitor            | 0,363 | 0,005 |
| 0,451 | 0,004 | Magnesium-protoporphyrin IX methyltransferase inhibitor | 0,376 | 0,020 |

|       |       |                                                         |       |       |
|-------|-------|---------------------------------------------------------|-------|-------|
| 0,448 | 0,002 | D-arabinonolactone oxidase inhibitor                    | 0,376 | 0,020 |
| 0,454 | 0,008 | Methylenetetrahydrofolate dehydrogenase (NADP+) inhib   | 0,370 | 0,015 |
| 0,465 | 0,019 | Pyroglutamyl-peptidase I inhibitor                      | 0,363 | 0,008 |
| 0,450 | 0,004 | D-glutamate oxidase inhibitor                           | 0,406 | 0,051 |
| 0,461 | 0,015 | Antiprotozoal (Amoeba)                                  | 0,367 | 0,012 |
| 0,459 | 0,013 | Peroxidase substrate                                    | 0,367 | 0,013 |
| 0,449 | 0,005 | UDP-glucose-hexose-1-phosphate uridylyltransferase inhi | 0,364 | 0,011 |
| 0,446 | 0,001 | 4-Hydroxybenzoate 3-monooxygenase [NAD(P)H] inhibito    | 0,356 | 0,003 |
| 0,475 | 0,032 | Renal tissue kallikrein inhibitor                       | 0,356 | 0,005 |
| 0,449 | 0,005 | Isovaleryl-CoA dehydrogenase inhibitor                  | 0,363 | 0,014 |
| 0,447 | 0,004 | Glutamine-tRNA ligase inhibitor                         | 0,352 | 0,003 |
| 0,446 | 0,003 | 4-Hydroxy-2-oxoglutarate aldolase inhibitor             | 0,356 | 0,006 |
| 0,476 | 0,034 | IgA-specific serine endopeptidase inhibitor             | 0,360 | 0,010 |
| 0,476 | 0,034 | Antiviral (Rhinovirus)                                  | 0,353 | 0,004 |
| 0,445 | 0,004 | Guanidinobutyrase inhibitor                             | 0,351 | 0,003 |
| 0,449 | 0,008 | X-Pro dipeptidase inhibitor                             | 0,389 | 0,041 |
| 0,443 | 0,002 | 6-Methylsalicylate decarboxylase inhibitor              | 0,351 | 0,004 |
| 0,473 | 0,033 | Cyclic AMP phosphodiesterase inhibitor                  | 0,388 | 0,040 |
| 0,443 | 0,002 | Orcinol 2-monooxygenase inhibitor                       | 0,367 | 0,020 |
| 0,451 | 0,011 | Acyl-CoA hydrolase inhibitor                            | 0,352 | 0,005 |
| 0,451 | 0,011 | Palmitoyl-CoA hydrolase inhibitor                       | 0,351 | 0,004 |
| 0,445 | 0,005 | N4-(beta-N-acetylglucosaminyl)-L-asparaginase inhibitor | 0,393 | 0,046 |
| 0,443 | 0,005 | Alanine dehydrogenase inhibitor                         | 0,362 | 0,016 |
| 0,441 | 0,004 | Alpha-L-rhamnosidase inhibitor                          | 0,353 | 0,007 |
| 0,445 | 0,009 | Adenylyl-sulfate kinase inhibitor                       | 0,352 | 0,007 |
| 0,479 | 0,043 | CYP2C8 substrate                                        | 0,443 | 0,099 |
| 0,443 | 0,007 | Gametolysin inhibitor                                   | 0,352 | 0,009 |
| 0,442 | 0,007 | Aldehyde dehydrogenase (NAD+) inhibitor                 | 0,353 | 0,010 |
| 0,441 | 0,006 | Inositol-polyphosphate 5-phosphatase inhibitor          | 0,351 | 0,009 |
| 0,449 | 0,014 | Oxidizing agent                                         | 0,349 | 0,009 |
| 0,438 | 0,004 | Cysteine synthase inhibitor                             | 0,389 | 0,049 |
| 0,438 | 0,003 | Retinol O-fatty-acyltransferase inhibitor               | 0,345 | 0,004 |
| 0,458 | 0,024 | Cutinase inhibitor                                      | 0,374 | 0,034 |
| 0,437 | 0,003 | HIV-1 integrase (Strand Transfer) inhibitor             | 0,359 | 0,020 |
| 0,438 | 0,004 | Propionate-CoA ligase inhibitor                         | 0,354 | 0,015 |
| 0,436 | 0,002 | ATP deaminase inhibitor                                 | 0,353 | 0,015 |
| 0,510 | 0,077 | Acute neurologic disorders treatment                    | 0,368 | 0,029 |
| 0,437 | 0,005 | Isocitrate dehydrogenase (NADP+) inhibitor              | 0,419 | 0,081 |
| 0,449 | 0,016 | Alkylglycerone-phosphate synthase inhibitor             | 0,426 | 0,088 |
| 0,434 | 0,002 | 3-Dehydroquinone synthase inhibitor                     | 0,347 | 0,009 |
| 0,434 | 0,002 | Fructuronate reductase inhibitor                        | 0,366 | 0,029 |
| 0,434 | 0,002 | Tagaturonate reductase inhibitor                        | 0,355 | 0,019 |
| 0,446 | 0,014 | UGT1A4 substrate                                        | 0,343 | 0,007 |
| 0,438 | 0,006 | Peptidylamidoglycolate lyase inhibitor                  | 0,430 | 0,094 |
| 0,441 | 0,009 | Poly(3-hydroxybutyrate) depolymerase inhibitor          | 0,345 | 0,009 |
| 0,437 | 0,006 | Tryptophan 2,3-dioxygenase inhibitor                    | 0,345 | 0,009 |
| 0,434 | 0,004 | Anthranilate phosphoribosyltransferase inhibitor        | 0,364 | 0,028 |

|       |       |                                                         |       |       |
|-------|-------|---------------------------------------------------------|-------|-------|
| 0,434 | 0,004 | Phosphoglycolate phosphatase inhibitor                  | 0,398 | 0,064 |
| 0,437 | 0,007 | Aldehyde dehydrogenase inhibitor                        | 0,340 | 0,006 |
| 0,434 | 0,005 | Proline racemase inhibitor                              | 0,360 | 0,027 |
| 0,433 | 0,004 | Glutamate (mGluR5) agonist                              | 0,346 | 0,012 |
| 0,440 | 0,011 | FMO3 substrate                                          | 0,337 | 0,004 |
| 0,430 | 0,003 | D-stereospecific aminopeptidase inhibitor               | 0,342 | 0,010 |
| 0,430 | 0,003 | HIV-1 integrase inhibitor                               | 0,346 | 0,013 |
| 0,434 | 0,007 | Aureolysin inhibitor                                    | 0,359 | 0,026 |
| 0,430 | 0,003 | Agaritine gamma-glutamyltransferase inhibitor           | 0,352 | 0,020 |
| 0,433 | 0,007 | Cyclopropane-fatty-acyl-phospholipid synthase inhibitor | 0,378 | 0,047 |
| 0,431 | 0,005 | Ribonucleoside triphosphate reductase inhibitor         | 0,377 | 0,046 |
| 0,444 | 0,018 | CYP1A inducer                                           | 0,334 | 0,003 |
| 0,430 | 0,004 | Oxoglutarate dehydrogenase (lipoamide) inhibitor        | 0,365 | 0,035 |
| 0,458 | 0,033 | Sigma receptor agonist                                  | 0,333 | 0,004 |
| 0,443 | 0,018 | 4-Nitrophenylphosphatase inhibitor                      | 0,341 | 0,013 |
| 0,427 | 0,002 | 2-Dehydro-3-deoxy-L-arabinonate dehydratase inhibitor   | 0,331 | 0,004 |
| 0,438 | 0,014 | Serum-glucocorticoid regulated kinase 1 inhibitor       | 0,333 | 0,006 |
| 0,426 | 0,002 | Chorismate mutase inhibitor                             | 0,331 | 0,005 |
| 0,428 | 0,005 | Alkaline phosphatase inhibitor                          | 0,346 | 0,021 |
| 0,437 | 0,014 | Opioid kappa 3 receptor antagonist                      | 0,468 | 0,143 |
| 0,430 | 0,006 | ATP adenylyltransferase inhibitor                       | 0,354 | 0,030 |
| 0,435 | 0,012 | UGT1A8 substrate                                        | 0,353 | 0,030 |
| 0,424 | 0,003 | Choloylglycine hydrolase inhibitor                      | 0,327 | 0,006 |
| 0,454 | 0,032 | Simian immunodeficiency virus proteinase inhibitor      | 0,334 | 0,013 |
| 0,428 | 0,007 | Sterol 3-beta-glucosyltransferase inhibitor             | 0,327 | 0,006 |
| 0,430 | 0,010 | Diacylglycerol cholinephosphotransferase inhibitor      | 0,328 | 0,007 |
| 0,458 | 0,039 | CYP2C19 substrate                                       | 0,332 | 0,012 |
| 0,420 | 0,001 | Stipitatonate decarboxylase inhibitor                   | 0,380 | 0,061 |
| 0,461 | 0,043 | Antipruritic                                            | 0,327 | 0,008 |
| 0,422 | 0,003 | Aromatic-hydroxylamine O-acetyltransferase inhibitor    | 0,326 | 0,007 |
| 0,429 | 0,010 | Phosphatidate cytidylyltransferase inhibitor            | 0,337 | 0,019 |
| 0,446 | 0,028 | Anthelmintic (Nematodes)                                | 0,356 | 0,038 |
| 0,435 | 0,017 | Vanilloid 1 agonist                                     | 0,327 | 0,010 |
| 0,423 | 0,006 | Coproporphyrinogen oxidase inhibitor                    | 0,379 | 0,062 |
| 0,439 | 0,021 | Retinoic acid metabolism inhibitor                      | 0,336 | 0,020 |
| 0,425 | 0,009 | Maltose-transporting ATPase inhibitor                   | 0,332 | 0,017 |
| 0,495 | 0,078 | CYP3A2 substrate                                        | 0,319 | 0,005 |
| 0,425 | 0,009 | Pappalysin-1 inhibitor                                  | 0,318 | 0,004 |
| 0,420 | 0,004 | (S)-2-hydroxy-acid oxidase inhibitor                    | 0,325 | 0,011 |
| 0,429 | 0,014 | Bontoxilysin inhibitor                                  | 0,321 | 0,008 |
| 0,420 | 0,005 | Biphenyl-2,3-diol 1,2-dioxygenase inhibitor             | 0,322 | 0,010 |
| 0,427 | 0,012 | CYP2C6 substrate                                        | 0,327 | 0,015 |
| 0,436 | 0,022 | Skin irritation, inactive                               | 0,326 | 0,014 |
| 0,422 | 0,007 | Dopamine release stimulant                              | 0,317 | 0,005 |
| 0,418 | 0,004 | Gout treatment                                          | 0,365 | 0,053 |
| 0,422 | 0,008 | Expectorant                                             | 0,323 | 0,011 |
| 0,420 | 0,006 | Pyruvate carboxylase inhibitor                          | 0,319 | 0,007 |



|       |       |                                               |       |       |
|-------|-------|-----------------------------------------------|-------|-------|
| 0,423 | 0,009 | N6-methyl-lysine oxidase inhibitor            | 0,335 | 0,024 |
| 0,417 | 0,003 | Oligo-1,6-glucosidase inhibitor               | 0,339 | 0,029 |
| 0,427 | 0,014 | Sclerosant                                    | 0,322 | 0,012 |
| 0,416 | 0,003 | (S)-carnitine 3-dehydrogenase inhibitor       | 0,322 | 0,012 |
| 0,436 | 0,023 | CYP2E1 substrate                              | 0,337 | 0,027 |
| 0,426 | 0,013 | 2-Acylglycerol O-acyltransferase inhibitor    | 0,319 | 0,010 |
| 0,416 | 0,005 | Phosphoserine phosphatase inhibitor           | 0,366 | 0,058 |
| 0,415 | 0,004 | Beta-D-fucosidase inhibitor                   | 0,317 | 0,009 |
| 0,417 | 0,007 | 2-Oxoaldehyde dehydrogenase (NAD+) inhibitor  | 0,317 | 0,010 |
| 0,422 | 0,011 | Quercetin 2,3-dioxygenase inhibitor           | 0,394 | 0,086 |
| 0,434 | 0,024 | CYP2E substrate                               | 0,335 | 0,028 |
| 0,414 | 0,004 | Cell wall biosynthesis inhibitor              | 0,313 | 0,007 |
| 0,413 | 0,004 | Glutamate N-acetyltransferase inhibitor       | 0,309 | 0,003 |
| 0,413 | 0,004 | Glycine N-acyltransferase inhibitor           | 0,309 | 0,003 |
| 0,429 | 0,021 | UGT2B4 substrate                              | 0,312 | 0,007 |
| 0,412 | 0,004 | Transcription factor NF kappa A inhibitor     | 0,332 | 0,028 |
| 0,438 | 0,029 | Antiprotozoal (Trypanosoma)                   | 0,311 | 0,006 |
| 0,416 | 0,008 | NADH dehydrogenase inhibitor                  | 0,318 | 0,013 |
| 0,429 | 0,021 | CYP7 inhibitor                                | 0,323 | 0,019 |
| 0,440 | 0,033 | Menopausal disorders treatment                | 0,323 | 0,019 |
| 0,440 | 0,033 | CYP2B substrate                               | 0,315 | 0,012 |
| 0,416 | 0,010 | Allantoate deiminase inhibitor                | 0,312 | 0,008 |
| 0,455 | 0,049 | Octopamine antagonist                         | 0,371 | 0,068 |
| 0,425 | 0,019 | Protein-tyrosine sulfotransferase inhibitor   | 0,306 | 0,003 |
| 0,440 | 0,034 | CYP2A2 substrate                              | 0,331 | 0,028 |
| 0,409 | 0,003 | Antifibrinolytic                              | 0,370 | 0,068 |
| 0,410 | 0,006 | Uric acid excretion stimulant                 | 0,306 | 0,004 |
| 0,409 | 0,004 | Thioredoxin reductase inhibitor               | 0,389 | 0,087 |
| 0,423 | 0,019 | Acrosin inhibitor                             | 0,377 | 0,075 |
| 0,412 | 0,008 | Sulfate adenylyltransferase inhibitor         | 0,319 | 0,018 |
| 0,457 | 0,054 | CYP2A1 substrate                              | 0,331 | 0,030 |
| 0,432 | 0,029 | CYP2C9 inducer                                | 0,305 | 0,005 |
| 0,413 | 0,010 | ICAM1 expression inhibitor                    | 0,303 | 0,003 |
| 0,412 | 0,009 | Cholesterol oxidase inhibitor                 | 0,427 | 0,128 |
| 0,422 | 0,020 | Myeloblastin inhibitor                        | 0,326 | 0,027 |
| 0,411 | 0,009 | FMN reductase inhibitor                       | 0,304 | 0,005 |
| 0,407 | 0,005 | Maleate isomerase inhibitor                   | 0,303 | 0,004 |
| 0,406 | 0,004 | Mevalonate kinase inhibitor                   | 0,346 | 0,048 |
| 0,414 | 0,012 | BRAF expression inhibitor                     | 0,303 | 0,005 |
| 0,421 | 0,020 | Chemoprotective                               | 0,313 | 0,015 |
| 0,412 | 0,011 | Lactose synthase inhibitor                    | 0,324 | 0,026 |
| 0,403 | 0,002 | 2-Methylcitrate dehydratase inhibitor         | 0,303 | 0,005 |
| 0,432 | 0,032 | Antimycobacterial                             | 0,303 | 0,005 |
| 0,411 | 0,011 | Acetylserotonin O-methyltransferase inhibitor | 0,304 | 0,007 |
| 0,419 | 0,019 | CYP2B11 substrate                             | 0,318 | 0,022 |
| 0,404 | 0,004 | Pyridoxal kinase inhibitor                    | 0,304 | 0,008 |
| 0,414 | 0,015 | UGT1A3 substrate                              | 0,324 | 0,028 |

|       |       |                                                     |       |       |
|-------|-------|-----------------------------------------------------|-------|-------|
| 0,403 | 0,005 | Acyl-CoA oxidase inhibitor                          | 0,311 | 0,015 |
| 0,402 | 0,003 | Deoxyribonuclease I inhibitor                       | 0,366 | 0,070 |
| 0,442 | 0,044 | Antisecretoric                                      | 0,317 | 0,022 |
| 0,404 | 0,006 | Phenylalanine dehydrogenase inhibitor               | 0,316 | 0,021 |
| 0,403 | 0,005 | Antihyperlipoproteinemic                            | 0,321 | 0,026 |
| 0,444 | 0,047 | CYP2A8 substrate                                    | 0,327 | 0,033 |
| 0,407 | 0,010 | Glutathione synthase inhibitor                      | 0,315 | 0,021 |
| 0,403 | 0,006 | UDP-glucose 4-epimerase inhibitor                   | 0,401 | 0,107 |
| 0,406 | 0,009 | Calcium-sensing receptor agonist                    | 0,335 | 0,042 |
| 0,415 | 0,019 | Protein-arginine deiminase inhibitor                | 0,303 | 0,009 |
| 0,409 | 0,013 | CYP2B10 substrate                                   | 0,333 | 0,040 |
| 0,410 | 0,014 | UGT2B7 substrate                                    | 0,361 | 0,069 |
| 0,405 | 0,010 | 3-Chloro-D-alanine dehydrochlorinase inhibitor      | 0,308 | 0,016 |
| 0,405 | 0,010 | CYP2C29 substrate                                   | 0,323 | 0,031 |
| 0,409 | 0,014 | Phospholipase C inhibitor                           | 0,319 | 0,028 |
| 0,399 | 0,006 | Laxative                                            | 0,317 | 0,025 |
| 0,418 | 0,026 | Antibacterial                                       | 0,346 | 0,056 |
| 0,397 | 0,004 | Beta-ureidopropionase inhibitor                     | 0,307 | 0,017 |
| 0,403 | 0,011 | UGT2B28 substrate                                   | 0,303 | 0,014 |
| 0,414 | 0,023 | Yeast ribonuclease inhibitor                        | 0,411 | 0,122 |
| 0,399 | 0,007 | Methylglutamate dehydrogenase inhibitor             | 0,308 | 0,020 |
| 0,404 | 0,013 | Antidiabetic symptomatic                            | 0,311 | 0,023 |
| 0,393 | 0,003 | 4-Carboxymethyl-4-methylbutenolide mutase inhibitor | 0,301 | 0,013 |
| 0,398 | 0,008 | Antiperistaltic                                     | 0,353 | 0,066 |
| 0,456 | 0,066 | CYP3A1 substrate                                    | 0,364 | 0,077 |
| 0,409 | 0,020 | Oryzin inhibitor                                    | 0,378 | 0,095 |
| 0,396 | 0,006 | Cerevisin inhibitor                                 | 0,307 | 0,026 |
| 0,392 | 0,003 | D-Ornithine 4,5-aminomutase inhibitor               | 0,339 | 0,059 |
| 0,410 | 0,021 | Chaperonin ATPase inhibitor                         | 0,303 | 0,022 |
| 0,394 | 0,006 | Choline sulfotransferase inhibitor                  | 0,381 | 0,100 |
| 0,394 | 0,006 | Protein phosphatase inhibitor                       | 0,363 | 0,084 |
| 0,390 | 0,003 | 3-Deoxy-7-phosphoheptulonate synthase inhibitor     | 0,377 | 0,100 |
| 0,390 | 0,003 | Creatine kinase inhibitor                           | 0,317 | 0,040 |
| 0,451 | 0,064 | Antineoplastic (non-Hodgkin's lymphoma)             | 0,302 | 0,028 |
| 0,400 | 0,014 | Tripeptide aminopeptidase inhibitor                 | 0,317 | 0,043 |
| 0,397 | 0,010 | CTGF expression inhibitor                           | 0,347 | 0,073 |
| 0,388 | 0,003 | Selectin P antagonist                               | 0,317 | 0,044 |
| 0,389 | 0,004 | Thiol S-methyltransferase inhibitor                 | 0,323 | 0,051 |
| 0,412 | 0,027 | CYP2G1 substrate                                    | 0,302 | 0,030 |
| 0,406 | 0,022 | Chemopreventive                                     | 0,315 | 0,044 |
| 0,387 | 0,003 | Trimethyllysine dioxygenase inhibitor               | 0,323 | 0,052 |
| 0,391 | 0,008 | NAD+ kinase inhibitor                               | 0,308 | 0,037 |
| 0,405 | 0,022 | Envelysin inhibitor                                 | 0,343 | 0,073 |
| 0,394 | 0,011 | 2-Dehydropantoate aldolase inhibitor                | 0,339 | 0,075 |
| 0,390 | 0,007 | 3-Hydroxyanthranilate oxidase inhibitor             | 0,337 | 0,074 |
| 0,385 | 0,002 | Mycodextranase inhibitor                            | 0,332 | 0,073 |
| 0,431 | 0,049 | CYP2D15 substrate                                   | 0,333 | 0,075 |

|       |       |                                                                                  |       |       |
|-------|-------|----------------------------------------------------------------------------------|-------|-------|
| 0,384 | 0,002 | Pyridoxamine-phosphate oxidase inhibitor                                         | 0,323 | 0,067 |
| 0,385 | 0,004 | Gastritis treatment                                                              | 0,400 | 0,143 |
| 0,389 | 0,007 | tRNA cytidyltransferase inhibitor                                                | 0,307 | 0,051 |
| 0,385 | 0,004 | Glutamate dehydrogenase (NADP+) inhibitor                                        | 0,325 | 0,074 |
| 0,386 | 0,006 | NAD(P)+ transhydrogenase (B-specific) inhibitor                                  | 0,309 | 0,060 |
| 0,394 | 0,014 | Dihydroorotase inhibitor                                                         | 0,308 | 0,061 |
| 0,385 | 0,005 | Tryptophan dimethylallyltransferase inhibitor                                    | 0,352 | 0,106 |
| 0,420 | 0,042 | CYP3A4 inducer                                                                   | 0,306 | 0,061 |
| 0,398 | 0,021 | Methane monooxygenase inhibitor                                                  | 0,335 | 0,094 |
| 0,385 | 0,008 | UGT2B9 substrate                                                                 | 0,315 | 0,077 |
| 0,380 | 0,003 | Benzaldehyde dehydrogenase (NAD+) inhibitor                                      | 0,315 | 0,080 |
| 0,422 | 0,046 | Vasodilator, coronary                                                            | 0,303 | 0,073 |
| 0,378 | 0,003 | Maleate hydratase inhibitor                                                      | 0,334 | 0,104 |
| 0,378 | 0,003 | Guanidinopropionase inhibitor                                                    | 0,323 | 0,094 |
| 0,379 | 0,005 | Sickle-cell anemia treatment                                                     | 0,323 | 0,094 |
| 0,380 | 0,006 | Procollagen glucosyltransferase inhibitor                                        | 0,312 | 0,088 |
| 0,381 | 0,007 | Glutamate dehydrogenase inhibitor                                                | 0,314 | 0,113 |
| 0,417 | 0,044 | Bilirubin oxidase inhibitor                                                      | 0,363 | 0,189 |
| 0,377 | 0,003 | Succinate dehydrogenase inhibitor                                                | 0,312 | 0,140 |
| 0,378 | 0,005 | Skin whitener                                                                    | 0,307 | 0,137 |
| 0,421 | 0,048 | Na+-transporting two-sector ATPase inhibitor                                     | 0,389 | 0,228 |
| 0,388 | 0,016 | Thimet oligopeptidase inhibitor                                                  |       |       |
| 0,385 | 0,013 | UGT2B15 substrate                                                                |       |       |
| 0,393 | 0,021 | Polyneuridine-aldehyde esterase inhibitor                                        |       |       |
| 0,378 | 0,006 | tRNA (guanine-N1-)-methyltransferase inhibitor                                   |       |       |
| 0,404 | 0,033 | Antiviral (Herpes)                                                               |       |       |
| 0,385 | 0,014 | Mcl-1 antagonist                                                                 |       |       |
| 0,375 | 0,005 | D-malate dehydrogenase (decarboxylating) inhibitor                               |       |       |
| 0,381 | 0,010 | N-(5-amino-5-carboxypentanoyl)-L-cysteiny-L-valine synthase inhibitor            |       |       |
| 0,377 | 0,007 | Hydroxysteroid dehydrogenase inhibitor                                           |       |       |
| 0,375 | 0,006 | Protein-tyrosine phosphatase inhibitor                                           |       |       |
| 0,373 | 0,005 | Glutamate synthase (ferredoxin) inhibitor                                        |       |       |
| 0,411 | 0,043 | CYP3A inducer                                                                    |       |       |
| 0,373 | 0,006 | 5-Formyltetrahydrofolate cyclo-ligase inhibitor                                  |       |       |
| 0,372 | 0,005 | Nicotinamide-nucleotide adenylyltransferase inhibitor                            |       |       |
| 0,371 | 0,004 | Glucosamine 6-phosphate N-acetyltransferase inhibitor                            |       |       |
| 0,386 | 0,019 | Prion diseases treatment                                                         |       |       |
| 0,413 | 0,046 | Caspase 3 stimulant                                                              |       |       |
| 0,373 | 0,007 | Amyloid beta aggregation inhibitor                                               |       |       |
| 0,374 | 0,008 | Peptidyl-dipeptidase B inhibitor                                                 |       |       |
| 0,370 | 0,005 | Lysine 2-monooxygenase inhibitor                                                 |       |       |
| 0,370 | 0,004 | 2-Aminoadipate transaminase inhibitor                                            |       |       |
| 0,370 | 0,005 | Valine-tRNA ligase inhibitor                                                     |       |       |
| 0,411 | 0,046 | Dementia treatment                                                               |       |       |
| 0,384 | 0,020 | Alpha-1,6-mannosyl-glycoprotein 4-beta-N-acetylglucosaminyltransferase inhibitor |       |       |
| 0,372 | 0,009 | Dual specificity phosphatase inhibitor                                           |       |       |
| 0,395 | 0,031 | Anticarcinogenic                                                                 |       |       |

0,381 0,017 Serralysin inhibitor  
0,384 0,021 Clostripain inhibitor  
0,364 0,002 4-Pyridoxolactonase inhibitor  
0,368 0,005 Threonine ammonia-lyase inhibitor  
0,370 0,008 Polynucleotide 5'-hydroxy-kinase inhibitor  
0,381 0,020 CYP2A3 substrate  
0,369 0,008 CYP19 inhibitor  
0,382 0,022 NOS2 expression inhibitor  
0,363 0,003 Serine-sulfate ammonia-lyase inhibitor  
0,385 0,025 Hepatic disorders treatment  
0,367 0,007 Adenosylmethionine-8-amino-7-oxononanoate transaminase inhibitor  
0,372 0,013 Cholesterol synthesis inhibitor  
0,412 0,053 CYP3A3 substrate  
0,374 0,016 Photosensitizer  
0,362 0,004 Isocitrate dehydrogenase (NAD+) inhibitor  
0,387 0,029 Taurine-2-oxoglutarate transaminase inhibitor  
0,366 0,009 Saluretic  
0,373 0,016 Antiparkinsonian, tremor relieving  
0,359 0,002 Altronate dehydratase inhibitor  
0,362 0,006 Riboflavin phosphotransferase inhibitor  
0,359 0,004 Allantoicase inhibitor  
0,356 0,001 Orsellinate decarboxylase inhibitor  
0,365 0,009 Glycerol-3-phosphate O-acyltransferase inhibitor  
0,357 0,002 Transthyretin amyloid fibril formation inhibitor  
0,358 0,003 Scyllo-inosamine-4-phosphate amidinotransferase inhibitor  
0,393 0,038 Albendazole monooxygenase inhibitor  
0,365 0,010 Cycloartenol synthase inhibitor  
0,375 0,020 Dynein ATPase inhibitor  
0,362 0,007 Aldehyde dehydrogenase 2 substrate  
0,363 0,009 Antiviral (CMV)  
0,362 0,007 Antispirochetal  
0,366 0,011 Age-related macular degeneration treatment  
0,356 0,002 Saccharopine dehydrogenase (NAD+, L-glutamate-forming) inhibitor  
0,362 0,008 Excitatory amino acid transporter EAAC1 inhibitor  
0,357 0,004 Phosphomevalonate kinase inhibitor  
0,361 0,009 Adenylate kinase inhibitor  
0,357 0,004 Phosphoribulokinase inhibitor  
0,398 0,045 Aspergillopepsin I inhibitor  
0,361 0,009 Cyclic AMP modulator  
0,367 0,015 UGT2B17 substrate  
0,357 0,006 3C-like protease (Human coronavirus) inhibitor  
0,408 0,057 Lactase inhibitor  
0,371 0,019 Antipruritic, non-allergic  
0,375 0,024 Xenobiotic-transporting ATPase inhibitor  
0,368 0,019 N-acetyllactosaminide beta-1,3-N-acetylglucosaminyltransferase inhibitor  
0,374 0,024 Cancer associated disorders treatment  
0,374 0,025 Flavin-containing monooxygenase substrate

0,356 0,007 Adrenergic, ophthalmic  
0,367 0,018 Vascular (periferal) disease treatment  
0,398 0,050 Antifungal  
0,351 0,003 UDP-N-acetylglucosamine diphosphorylase inhibitor  
0,353 0,004 Branched-chain-amino-acid transaminase inhibitor  
0,352 0,005 UDP-glucuronate decarboxylase inhibitor  
0,348 0,002 (S)-2-Methylmalate dehydratase inhibitor  
0,356 0,010 Antihelminthic (Fasciola)  
0,351 0,006 Glycerophosphocholine cholinephosphodiesterase inhibitor  
0,354 0,009 Alkene monooxygenase inhibitor  
0,444 0,100 Gastrin inhibitor  
0,350 0,007 Adenine deaminase inhibitor  
0,348 0,005 Severe acute respiratory syndrome treatment  
0,372 0,029 PfA-M1 aminopeptidase inhibitor  
0,347 0,005 O-acetylhomoserine aminocarboxypropyltransferase inhibitor  
0,349 0,007 Homoserine dehydrogenase inhibitor  
0,362 0,021 Antinephritic  
0,380 0,040 Phosphatidylinositol diacylglycerol-lyase inhibitor  
0,347 0,007 Pyrroline-5-carboxylate reductase inhibitor  
0,349 0,010 Glycine hydroxymethyltransferase inhibitor  
0,341 0,003 Cellobiose phosphorylase inhibitor  
0,352 0,014 CYP4A2 substrate  
0,346 0,009 Homocitrate synthase inhibitor  
0,346 0,009 Alcohol dehydrogenase inhibitor  
0,344 0,007 ATPase inhibitor  
0,340 0,004 Anthranilate synthase inhibitor  
0,361 0,025 Flavin-containing monooxygenase inhibitor  
0,344 0,009 Urate-ribonucleotide phosphorylase inhibitor  
0,339 0,004 Hepatocyte nuclear factor 4 alpha antagonist  
0,339 0,004 Hepatocyte nuclear factor antagonist  
0,338 0,004 Formyltetrahydrofolate dehydrogenase inhibitor  
0,339 0,005 HIV-2 reverse transcriptase inhibitor  
0,344 0,010 NAD(P)+ transhydrogenase (AB-specific) inhibitor  
0,346 0,013 8-Amino-7-oxononanoate synthase inhibitor  
0,377 0,045 Vasodilator  
0,337 0,005 Isocitrate lyase inhibitor  
0,366 0,034 DNA synthesis inhibitor  
0,337 0,006 Fructose-2,6-bisphosphate 2-phosphatase inhibitor  
0,388 0,057 Transcription factor NF kappa B stimulant  
0,388 0,057 Transcription factor stimulant  
0,340 0,008 Glycerol-3-phosphate dehydrogenase (NAD+) inhibitor  
0,345 0,014 Ganglioside galactosyltransferase inhibitor  
0,338 0,007 Phosphate acetyltransferase inhibitor  
0,357 0,028 Sigma 1 receptor agonist  
0,332 0,004 Chondroitin 6-sulfotransferase inhibitor  
9 0,342 0,014 Apoptosis antagonist  
0,355 0,027 Signal peptidase I inhibitor

|       |       |                                                             |
|-------|-------|-------------------------------------------------------------|
| 0,388 | 0,061 | Hypolipemic                                                 |
| 0,337 | 0,010 | Lipoxygenase substrate                                      |
| 0,364 | 0,037 | Antialcoholic                                               |
| 0,330 | 0,004 | Iron antagonist                                             |
| 0,343 | 0,017 | Saccharolysin inhibitor                                     |
| 0,335 | 0,009 | Proteasome endopeptidase complex inhibitor                  |
| 0,334 | 0,008 | Estrone sulfotransferase inhibitor                          |
| 0,334 | 0,008 | Mucolytic                                                   |
| 0,342 | 0,017 | Peptidyl-Lys metalloendopeptidase inhibitor                 |
| 0,340 | 0,015 | 3-Methylbutanal reductase inhibitor                         |
| 0,355 | 0,030 | Endopeptidase La inhibitor                                  |
| 0,340 | 0,016 | 1,4-Alpha-glucan branching enzyme inhibitor                 |
| 0,326 | 0,002 | Lactate-malate transhydrogenase inhibitor                   |
| 0,329 | 0,005 | 3-Hydroxybutyrate dehydrogenase inhibitor                   |
| 0,326 | 0,003 | 4-Hydroxy-4-methyl-2-oxoglutarate aldolase inhibitor        |
| 0,344 | 0,021 | Nucleoside-diphosphatase inhibitor                          |
| 0,331 | 0,008 | Trehalose-phosphatase inhibitor                             |
| 0,330 | 0,008 | Estradiol 17alpha-dehydrogenase inhibitor                   |
| 0,347 | 0,026 | Galactolipase inhibitor                                     |
| 0,327 | 0,006 | Beta-fructofuranosidase inhibitor                           |
| 0,324 | 0,004 | Alanine carboxypeptidase inhibitor                          |
| 0,323 | 0,003 | Dihydrouracil oxidase inhibitor                             |
| 0,324 | 0,004 | Protein kinase A inhibitor                                  |
| 0,323 | 0,003 | GABA transporter 3 inhibitor                                |
| 0,386 | 0,067 | Gonadotropin antagonist                                     |
| 0,362 | 0,043 | Botulin neurotoxin A light chain inhibitor                  |
| 0,327 | 0,010 | Pectin lyase inhibitor                                      |
| 0,342 | 0,025 | Antiviral                                                   |
| 0,344 | 0,027 | Nardilysin inhibitor                                        |
| 0,321 | 0,005 | Asparaginase inhibitor                                      |
| 0,388 | 0,072 | Kinase inhibitor                                            |
| 0,325 | 0,009 | Interleukin 10 agonist                                      |
| 0,320 | 0,004 | Uroporphyrinogen decarboxylase inhibitor                    |
| 0,318 | 0,003 | Deoxycytidine deaminase inhibitor                           |
| 0,326 | 0,011 | Ligase inhibitor                                            |
| 0,319 | 0,005 | Cystathionine beta-lyase inhibitor                          |
| 0,323 | 0,009 | Topoisomerase II inhibitor                                  |
| 0,316 | 0,003 | L-lysine oxidase inhibitor                                  |
| 0,317 | 0,004 | Chelator                                                    |
| 0,339 | 0,026 | Adrenaline release stimulant                                |
| 0,320 | 0,008 | Phosphonoacetate hydrolase inhibitor                        |
| 0,316 | 0,004 | Pim kinase inhibitor                                        |
| 0,324 | 0,012 | Tropinesterase inhibitor                                    |
| 0,316 | 0,004 | UDP-N-acetylglucosamine 1-carboxyvinyltransferase inhibitor |
| 0,328 | 0,017 | Isopenicillin-N synthase inhibitor                          |
| 0,315 | 0,005 | SMN2 expression enhancer                                    |
| 0,318 | 0,009 | 3-Ketoalidoxylamine C-N-lyase inhibitor                     |

|       |       |                                                       |
|-------|-------|-------------------------------------------------------|
| 0,333 | 0,023 | Subtilisin inhibitor                                  |
| 0,317 | 0,009 | Selenocysteine lyase inhibitor                        |
| 0,313 | 0,005 | Nitric oxide scavenger                                |
| 0,323 | 0,016 | D-Octopine dehydrogenase inhibitor                    |
| 0,351 | 0,044 | Skeletal muscle relaxant                              |
| 0,309 | 0,002 | Sulfinioalanine decarboxylase inhibitor               |
| 0,319 | 0,013 | Penicillopepsin inhibitor                             |
| 0,316 | 0,010 | Beta-glucosidase inhibitor                            |
| 0,309 | 0,004 | Antirickettsial                                       |
| 0,320 | 0,015 | Glutathione S-transferase substrate                   |
| 0,308 | 0,004 | Xanthine dehydrogenase inhibitor                      |
| 0,312 | 0,007 | Cytosine deaminase inhibitor                          |
| 0,333 | 0,029 | Steroid synthesis inhibitor                           |
| 0,315 | 0,011 | Acetoacetate decarboxylase inhibitor                  |
| 0,339 | 0,035 | Antitoxic                                             |
| 0,309 | 0,005 | Diabetic nephropathy treatment                        |
| 0,337 | 0,033 | Non-steroidal antiinflammatory agent                  |
| 0,307 | 0,003 | Oxaloacetate tautomerase inhibitor                    |
| 0,307 | 0,004 | CYP4A1 substrate                                      |
| 0,366 | 0,063 | CYP2C18 substrate                                     |
| 0,338 | 0,035 | RNA synthesis inhibitor                               |
| 0,312 | 0,009 | Farnesoid X receptor antagonist                       |
| 0,308 | 0,006 | Xanthommatin reductase inhibitor                      |
| 0,329 | 0,027 | CYP2E1 inhibitor                                      |
| 0,304 | 0,004 | Urocanate hydratase inhibitor                         |
| 0,318 | 0,018 | 3-Isopropylmalate dehydratase inhibitor               |
| 0,316 | 0,016 | Sulfotransferase substrate                            |
| 0,308 | 0,009 | Retinyl-palmitate esterase inhibitor                  |
| 0,304 | 0,005 | Homocysteine desulfhydrase inhibitor                  |
| 0,304 | 0,005 | tRNA (cytosine-5-)-methyltransferase inhibitor        |
| 0,305 | 0,006 | 1-Aminocyclopropane-1-carboxylate deaminase inhibitor |
| 0,308 | 0,009 | Alpha,alpha-trehalase inhibitor                       |
| 0,352 | 0,054 | Anesthetic general                                    |
| 0,303 | 0,005 | Electrolyte absorption antagonist                     |
| 0,302 | 0,005 | Aromatic-amino-acid transaminase inhibitor            |
| 0,301 | 0,004 | Galactoside O-acetyltransferase inhibitor             |
| 0,316 | 0,020 | Glycine C-acetyltransferase inhibitor                 |
| 0,353 | 0,058 | Limulus clotting factor C inhibitor                   |
| 0,304 | 0,009 | Adenylylsulphatase inhibitor                          |
| 0,303 | 0,008 | Sucrose synthase inhibitor                            |
| 0,308 | 0,014 | X-His dipeptidase inhibitor                           |
| 0,304 | 0,012 | Lactoylglutathione lyase inhibitor                    |
| 0,302 | 0,013 | Methionine decarboxylase inhibitor                    |
| 0,330 | 0,043 | Antiinflammatory, ophthalmic                          |
| 0,301 | 0,015 | Peptidyl-glycinamidase inhibitor                      |
| 0,306 | 0,020 | Tentoxilysin inhibitor                                |
| 0,322 | 0,037 | Lysyl oxidase inhibitor                               |

0,301 0,017 Cyclooxygenase substrate  
0,361 0,078 Interleukin 2 agonist  
0,325 0,042 Endothelial growth factor antagonist  
0,345 0,063 Intermittent claudication treatment  
0,324 0,041 Proliferative diseases treatment  
0,305 0,022 Aminopeptidase B inhibitor  
0,314 0,031 Picornain 3C inhibitor  
0,376 0,094 Fibrinogen receptor antagonist  
0,366 0,084 Diabetic neuropathy treatment  
0,355 0,076 Cytochrome P450 stimulant  
0,306 0,026 Anti-Helicobacter pylori  
0,301 0,022 Amyloid beta precursor protein antagonist  
0,352 0,075 P-glycoprotein substrate  
0,345 0,069 CYP1A substrate  
0,322 0,046 GST P substrate  
0,332 0,058 HCV IRES inhibitor  
0,322 0,048 DELTA14-sterol reductase inhibitor  
0,323 0,049 Antiprotozoal (Coccidial)  
0,310 0,037 Angiogenesis stimulant  
0,305 0,032 Vascular dementia treatment  
0,301 0,031 Lipotropic  
0,369 0,099 CYP3A substrate  
0,342 0,073 CYP1A2 substrate  
0,322 0,054 CYP2C10 substrate  
0,351 0,084 Immunosuppressant  
0,316 0,049 Gestagen antagonist  
0,311 0,045 Inotropic  
0,329 0,063 Atherosclerosis treatment  
0,335 0,070 CYP2D2 inhibitor  
0,401 0,136 General pump inhibitor  
0,311 0,047 Opioid dependency treatment  
0,369 0,105 CYP3A4 substrate  
0,336 0,074 Antiulcerative  
0,361 0,103 Spasmolytic, urinary  
0,302 0,046 5 Hydroxytryptamine 2B agonist  
0,309 0,053 Antiparasitic  
0,327 0,076 Spasmolytic  
0,318 0,072 Immunostimulant  
0,329 0,083 Antiprotozoal (Leishmania)  
0,421 0,175 CDP-glycerol glycerophosphotransferase inhibitor  
0,317 0,073 Antidiabetic  
0,303 0,060 Monoamine uptake inhibitor  
0,335 0,095 5 Hydroxytryptamine release stimulant  
0,319 0,080 Myc inhibitor  
0,301 0,063 Hematopoietic inhibitor  
0,303 0,065 Antineurogenic pain  
0,310 0,076 CYP3A7 substrate



|       |       |                                                                 |
|-------|-------|-----------------------------------------------------------------|
| 0,303 | 0,071 | CYP2C11 substrate                                               |
| 0,423 | 0,193 | Nootropic                                                       |
| 0,354 | 0,135 | Mannotetraose 2-alpha-N-acetylglucosaminyltransferase inhibitor |
| 0,302 | 0,114 | CF transmembrane conductance regulator agonist                  |
| 0,313 | 0,145 | Antineoplastic                                                  |
| 0,306 | 0,148 | Chemosensitizer                                                 |
| 0,315 | 0,257 | Nicotinic alpha4beta4 receptor agonist                          |
| 0,302 | 0,294 | Antiischemic, cerebral                                          |

























| Activity                                              | Chlorogenic Acid |       |
|-------------------------------------------------------|------------------|-------|
|                                                       | Pa               | Pi    |
| Chlordecone reductase inhibitor                       | 1 0,940          | 0,004 |
| Aspulvinone dimethylallyltransferase inhibitor        | 0,920            | 0,001 |
| Ubiquinol-cytochrome-c reductase inhibitor            | 0,865            | 0,004 |
| 4-Methoxybenzoate monooxygenase (O-demethyla          | 2 0,856          | 0,002 |
| 2-Hydroxyquinoline 8-monooxygenase inhibitor          | 3 0,855          | 0,003 |
| Dehydro-L-gulonate decarboxylase inhibitor            | 0,846            | 0,004 |
| Testosterone 17beta-dehydrogenase (NADP+) inhibitor   | 0,846            | 0,004 |
| Taurine dehydrogenase inhibitor                       | 0,833            | 0,003 |
| Aldehyde oxidase inhibitor                            | 0,826            | 0,010 |
| Feruloyl esterase inhibitor                           | 0,815            | 0,003 |
| Catechol 1,2-dioxygenase inhibitor                    | 0,808            | 0,017 |
| Sugar-phosphatase inhibitor                           | 4 0,785          | 0,004 |
| NADPH-cytochrome-c2 reductase inhibitor               | 0,769            | 0,004 |
| Glutathione thiolesterase inhibitor                   | 0,778            | 0,014 |
| Alkane 1-monooxygenase inhibitor                      | 0,771            | 0,015 |
| Arylacetonitrilase inhibitor                          | 0,750            | 0,001 |
| Methylenetetrahydrofolate reductase (NADPH) inhibitor | 0,726            | 0,006 |
| Ribulose-phosphate 3-epimerase inhibitor              | 0,752            | 0,034 |
| Superoxide dismutase inhibitor                        | 0,701            | 0,003 |
| Arylsulfate sulfotransferase inhibitor                | 0,716            | 0,021 |
| Glucan endo-1,6-beta-glucosidase inhibitor            | 0,716            | 0,021 |
| UDP-N-acetylglucosamine 4-epimerase inhibitor         | 0,707            | 0,014 |
| Fusarinine-C ornithinesterase inhibitor               | 0,700            | 0,017 |
| Threonine aldolase inhibitor                          | 0,690            | 0,019 |
| Alkenylglycerophosphocholine hydrolase inhibitor      | 0,705            | 0,053 |
| Preneoplastic conditions treatment                    | 0,655            | 0,011 |
| Fatty-acyl-CoA synthase inhibitor                     | 0,680            | 0,037 |
| Shikimate 5-dehydrogenase inhibitor                   | 0,651            | 0,010 |
| Spermidine dehydrogenase inhibitor                    | 0,646            | 0,008 |
| Antiseptic                                            | 0,640            | 0,007 |
| N-acylmannosamine kinase inhibitor                    | 0,665            | 0,033 |
| Glutamyl endopeptidase II inhibitor                   | 0,647            | 0,017 |
| Nitrate reductase (cytochrome) inhibitor              | 0,632            | 0,002 |
| Prolyl aminopeptidase inhibitor                       | 0,628            | 0,001 |
| 5-O-(4-coumaroyl)-D-quinic 3'-monooxygenase inhibitor | 0,638            | 0,014 |
| Pullulanase inhibitor                                 | 0,680            | 0,057 |
| Aspartate-phenylpyruvate transaminase inhibitor       | 0,658            | 0,037 |
| Amine dehydrogenase inhibitor                         | 0,622            | 0,009 |
| Fructose 5-dehydrogenase inhibitor                    | 0,621            | 0,016 |
| 4-Nitrophenol 2-monooxygenase inhibitor               | 0,668            | 0,066 |
| Arginine 2-monooxygenase inhibitor                    | 0,602            | 0,013 |
| Monodehydroascorbate reductase (NADH) inhibitor       | 0,599            | 0,016 |
| Beta-carotene 15,15'-monooxygenase inhibitor          | 0,590            | 0,007 |
| Antieczematic                                         | 0,599            | 0,017 |

|                                                                  |       |       |
|------------------------------------------------------------------|-------|-------|
| Aldehyde dehydrogenase (pyrroloquinoline-quinone) inhibitor      | 0,588 | 0,014 |
| Peroxidase inhibitor                                             | 0,580 | 0,006 |
| 4-Hydroxyproline epimerase inhibitor                             | 0,584 | 0,010 |
| Anaphylatoxin receptor antagonist                                | 0,584 | 0,014 |
| Vanillyl-alcohol oxidase inhibitor                               | 0,602 | 0,034 |
| Corticosteroid side-chain-isomerase inhibitor                    | 0,598 | 0,032 |
| Cis-1,2-dihydro-1,2-dihydroxynaphthalene dehydrogenase inhibitor | 0,589 | 0,028 |
| Dextranase inhibitor                                             | 0,621 | 0,060 |
| Bisphosphoglycerate phosphatase inhibitor                        | 0,594 | 0,041 |
| 3-Hydroxybenzoate 6-monooxygenase inhibitor                      | 0,566 | 0,014 |
| Fibrinolytic                                                     | 0,594 | 0,043 |
| Creatininase inhibitor                                           | 0,592 | 0,047 |
| JAK2 expression inhibitor                                        | 0,570 | 0,027 |
| Sulfite reductase inhibitor                                      | 0,561 | 0,020 |
| Phosphatidylcholine-retinol O-acyltransferase inhibitor          | 0,555 | 0,016 |
| NADH kinase inhibitor                                            | 0,565 | 0,027 |
| Pro-opiomelanocortin converting enzyme inhibitor                 | 0,559 | 0,025 |
| Gamma-guanidinobutyraldehyde dehydrogenase inhibitor             | 0,569 | 0,036 |
| Aminobutyraldehyde dehydrogenase inhibitor                       | 0,575 | 0,043 |
| Nicotinate dehydrogenase inhibitor                               | 0,577 | 0,046 |
| Glucose oxidase inhibitor                                        | 0,542 | 0,012 |
| Aminomuconate-semialdehyde dehydrogenase inhibitor               | 0,542 | 0,017 |
| Antimutagenic                                                    | 0,559 | 0,034 |
| Peptide alpha-N-acetyltransferase inhibitor                      | 0,528 | 0,004 |
| Sphinganine kinase inhibitor                                     | 0,537 | 0,013 |
| 2-Hydroxyomuconate-semialdehyde hydrolase inhibitor              | 0,534 | 0,012 |
| Aryl-alcohol dehydrogenase inhibitor                             | 0,537 | 0,018 |
| Glutamate-5-semialdehyde dehydrogenase inhibitor                 | 0,537 | 0,023 |
| Urethanase inhibitor                                             | 0,533 | 0,020 |
| tRNA-pseudouridine synthase I inhibitor                          | 0,576 | 0,066 |
| 2-Nitropropane dioxygenase inhibitor                             | 0,524 | 0,018 |
| Hyponitrite reductase inhibitor                                  | 0,524 | 0,018 |
| Membrane integrity agonist                                       | 0,506 | 0,005 |
| Electron-transferring-flavoprotein dehydrogenase inhibitor       | 0,504 | 0,003 |
| Dimethylargininase inhibitor                                     | 0,519 | 0,020 |
| Benzoate-CoA ligase inhibitor                                    | 0,581 | 0,083 |
| Methylamine-glutamate N-methyltransferase inhibitor              | 0,529 | 0,033 |
| Glutamine-phenylpyruvate transaminase inhibitor                  | 0,519 | 0,025 |
| Exoribonuclease II inhibitor                                     | 0,521 | 0,036 |
| Phosphatidylserine decarboxylase inhibitor                       | 0,486 | 0,005 |
| Polyamine-transporting ATPase inhibitor                          | 0,484 | 0,006 |
| Gluconate 5-dehydrogenase inhibitor                              | 0,513 | 0,035 |
| Glyoxylate oxidase inhibitor                                     | 0,588 | 0,112 |
| Chenodeoxycholytaurine hydrolase inhibitor                       | 0,488 | 0,016 |
| Procollagen-lysine 5-dioxygenase inhibitor                       | 0,477 | 0,007 |
| L-glutamate oxidase inhibitor                                    | 0,479 | 0,013 |
| Lactaldehyde reductase inhibitor                                 | 0,498 | 0,032 |

|                                                             |         |       |
|-------------------------------------------------------------|---------|-------|
| Nicotine dehydrogenase inhibitor                            | 0,472   | 0,007 |
| Sarcosine oxidase inhibitor                                 | 0,463   | 0,002 |
| (R)-Pantolactone dehydrogenase (flavin) inhibitor           | 0,463   | 0,006 |
| Crotonoyl-[acyl-carrier-protein] hydratase inhibitor        | 0,513   | 0,059 |
| Membrane permeability inhibitor                             | 0,488   | 0,035 |
| Opheline kinase inhibitor                                   | 0,474   | 0,023 |
| Taurocyamine kinase inhibitor                               | 0,506   | 0,055 |
| 3-Demethylubiquinone-9 3-O-methyltransferase inhibitor      | 0,468   | 0,020 |
| Formaldehyde transketolase inhibitor                        | 0,461   | 0,017 |
| 2-Dehydropantoate 2-reductase inhibitor                     | 0,479   | 0,036 |
| Sulfite oxidase inhibitor                                   | 0,443   | 0,002 |
| Pterin deaminase inhibitor                                  | 0,484   | 0,044 |
| ADP-thymidine kinase inhibitor                              | 0,449   | 0,009 |
| Nitrite reductase [NAD(P)H] inhibitor                       | 0,469   | 0,029 |
| NADPH-ferrihemoprotein reductase inhibitor                  | 0,454   | 0,017 |
| 1,4-Lactonase inhibitor                                     | 0,472   | 0,036 |
| N-benzyloxycarbonylglycine hydrolase inhibitor              | 0,445   | 0,013 |
| S-alkylcysteine lyase inhibitor                             | 0,437   | 0,007 |
| Cyclohexyl-isocyanide hydratase inhibitor                   | 0,492   | 0,063 |
| N-Acyl-D-aspartate deacylase inhibitor                      | 0,438   | 0,009 |
| Fructan beta-fructosidase inhibitor                         | 0,451   | 0,024 |
| Antiseborrhoeic                                             | 0,443   | 0,017 |
| Long-chain-aldehyde dehydrogenase inhibitor                 | 0,448   | 0,024 |
| Mucinamylserine mucinamidase inhibitor                      | 0,427   | 0,004 |
| N-acetylneuraminate 7-O(or 9-O)-acetyltransferase inhibitor | 0,519   | 0,095 |
| UGT1A6 substrate                                            | 0,425   | 0,004 |
| Naphthalene 1,2-dioxygenase inhibitor                       | 0,468   | 0,049 |
| Ferredoxin-NAD+ reductase inhibitor                         | 0,481   | 0,063 |
| Phenol O-methyltransferase inhibitor                        | 0,463   | 0,048 |
| N-acetylneuraminate synthase inhibitor                      | 0,454   | 0,040 |
| Linoleate diol synthase inhibitor                           | 0,467   | 0,055 |
| Phloroglucinol reductase inhibitor                          | 0,413   | 0,004 |
| NADPH peroxidase inhibitor                                  | 0,443   | 0,034 |
| Glyoxylate reductase inhibitor                              | 0,485   | 0,078 |
| Gluconate 2-dehydrogenase (acceptor) inhibitor              | 0,407   | 0,004 |
| Lysase inhibitor                                            | 0,455   | 0,055 |
| N-methylhydantoinase (ATP-hydrolysing) inhibitor            | 0,462   | 0,064 |
| Aspartate-ammonia ligase inhibitor                          | 0,412   | 0,015 |
| 2,6-Dihydropyridine 3-monooxygenase inhibitor               | 0,423   | 0,027 |
| Acylesterase inhibitor                                      | 0,433   | 0,039 |
| Trans-acenaphthene-1,2-diol dehydrogenase inhibitor         | 0,397   | 0,005 |
| 2-Oxoaldehyde dehydrogenase (NADP+) inhibitor               | 0,407   | 0,015 |
| Mucositis treatment                                         | 0,423   | 0,033 |
| Carbon-monoxide dehydrogenase inhibitor                     | 0,417   | 0,029 |
| CYP2C12 substrate                                           | 0,433   | 0,046 |
| 4-Coumarate-CoA ligase inhibitor                            | 6 0,409 | 0,022 |
| 3-Hydroxy-4-oxoquinoline 2,4-dioxygenase inhibitor          | 0,410   | 0,025 |

|                                                         |       |       |
|---------------------------------------------------------|-------|-------|
| Mannan endo-1,4-beta-mannosidase inhibitor              | 0,442 | 0,059 |
| Tryptophanamidase inhibitor                             | 0,410 | 0,029 |
| Mannitol-1-phosphatase inhibitor                        | 0,411 | 0,031 |
| Lysine 2,3-aminomutase inhibitor                        | 0,402 | 0,028 |
| Poly(alpha-L-guluronate) lyase inhibitor                | 0,424 | 0,050 |
| Uroporphyrinogen-III synthase inhibitor                 | 0,389 | 0,015 |
| Phenylpyruvate decarboxylase inhibitor                  | 0,456 | 0,083 |
| Salicylate 1-monooxygenase inhibitor                    | 0,383 | 0,012 |
| Allyl-alcohol dehydrogenase inhibitor                   | 0,411 | 0,042 |
| Glucan endo-1,3-beta-D-glucosidase inhibitor            | 0,416 | 0,050 |
| Hydroxylamine reductase (NADH) inhibitor                | 0,413 | 0,049 |
| Rhamnulose-1-phosphate aldolase inhibitor               | 0,396 | 0,031 |
| Anthranilate-CoA ligase inhibitor                       | 0,393 | 0,029 |
| Cholestanetriol 26-monooxygenase inhibitor              | 0,367 | 0,004 |
| 3-Hydroxybenzoate 4-monooxygenase inhibitor             | 0,378 | 0,016 |
| Aryl-alcohol dehydrogenase (NADP+) inhibitor            | 0,387 | 0,026 |
| Insulysin inhibitor                                     | 0,397 | 0,039 |
| Limulus clotting factor B inhibitor                     | 0,391 | 0,033 |
| Benzoate 4-monooxygenase inhibitor                      | 0,431 | 0,075 |
| Hydrogen dehydrogenase inhibitor                        | 0,414 | 0,058 |
| L-glucuronate reductase inhibitor                       | 0,371 | 0,015 |
| Tpr proteinase (Porphyromonas gingivalis) inhibitor     | 0,381 | 0,026 |
| Mitochondrial processing peptidase inhibitor            | 0,374 | 0,021 |
| 3-Carboxyethylcatechol 2,3-dioxygenase inhibitor        | 0,389 | 0,038 |
| Aminocarboxymuconate-semialdehyde decarboxylase inhi    | 0,406 | 0,054 |
| Steroid N-acetylglucosaminyltransferase inhibitor       | 0,371 | 0,020 |
| Histidinol-phosphatase inhibitor                        | 0,433 | 0,085 |
| Fragilysin inhibitor                                    | 0,374 | 0,027 |
| Polygalacturonase inhibitor                             | 0,403 | 0,056 |
| CYP2H substrate                                         | 0,396 | 0,051 |
| Peptide-N4-(N-acetyl-beta-glucosaminyl)asparagine amida | 0,399 | 0,055 |
| Prostaglandin-A1 DELTA-isomerase inhibitor              | 0,394 | 0,050 |
| Pyruvate decarboxylase inhibitor                        | 0,382 | 0,040 |
| Antiinfective                                           | 0,398 | 0,057 |
| Xylan endo-1,3-beta-xylosidase inhibitor                | 0,365 | 0,026 |
| 6-Pyruvoyltetrahydropterin synthase inhibitor           | 0,360 | 0,023 |
| D-xylulose reductase inhibitor                          | 0,360 | 0,027 |
| Glutarate-semialdehyde dehydrogenase inhibitor          | 0,480 | 0,147 |
| 4-Chlorophenylacetate 3,4-dioxygenase inhibitor         | 0,345 | 0,013 |
| Astringent                                              | 0,336 | 0,005 |
| Poly(beta-D-mannuronate) lyase inhibitor                | 0,403 | 0,073 |
| Cyclohexanone monooxygenase inhibitor                   | 0,370 | 0,041 |
| Gamma-butyrobetaine dioxygenase inhibitor               | 0,421 | 0,093 |
| Saccharopepsin inhibitor                                | 0,358 | 0,030 |
| Acrocylindropepsin inhibitor                            | 0,397 | 0,071 |
| Chymosin inhibitor                                      | 0,337 | 0,011 |
| Triacetate-lactonase inhibitor                          | 0,364 | 0,038 |



|                                                         |       |       |
|---------------------------------------------------------|-------|-------|
| 6-Carboxyhexanoate-CoA ligase inhibitor                 | 0,348 | 0,024 |
| Homoaconitate hydratase inhibitor                       | 0,382 | 0,058 |
| Biotin-CoA ligase inhibitor                             | 0,353 | 0,029 |
| Aryldialkylphosphatase inhibitor                        | 0,367 | 0,048 |
| Magnesium-protoporphyrin IX monomethyl ester (oxidativ  | 0,433 | 0,114 |
| Alkenylglycerophosphoethanolamine hydrolase inhibitor   | 0,376 | 0,061 |
| Gluconolactonase inhibitor                              | 0,338 | 0,023 |
| Aryl-acylamidase inhibitor                              | 0,378 | 0,064 |
| H <sup>+</sup> -exporting ATPase inhibitor              | 0,350 | 0,038 |
| 4-Hydroxyglutamate transaminase inhibitor               | 0,316 | 0,005 |
| Arylalkyl acylamidase inhibitor                         | 0,382 | 0,074 |
| Urease inhibitor                                        | 0,324 | 0,018 |
| 2,5-Dihydroxypyridine 5,6-dioxygenase inhibitor         | 0,322 | 0,017 |
| Ornithine cyclodeaminase inhibitor                      | 0,313 | 0,008 |
| Diphosphomevalonate decarboxylase inhibitor             | 0,398 | 0,094 |
| Styrene-oxide isomerase inhibitor                       | 0,359 | 0,058 |
| Phospholipid-translocating ATPase inhibitor             | 0,305 | 0,005 |
| S-formylglutathione hydrolase inhibitor                 | 0,371 | 0,071 |
| Diiodophenylpyruvate reductase inhibitor                | 0,326 | 0,027 |
| N-hydroxyarylamine O-acetyltransferase inhibitor        | 0,331 | 0,033 |
| (R)-6-hydroxynicotine oxidase inhibitor                 | 0,316 | 0,018 |
| Kidney function stimulant                               | 0,302 | 0,004 |
| Levanase inhibitor                                      | 0,312 | 0,014 |
| Thymidylate 5'-phosphatase inhibitor                    | 0,499 | 0,202 |
| Carnitinamidase inhibitor                               | 0,353 | 0,058 |
| Histidine N-acetyltransferase inhibitor                 | 0,321 | 0,029 |
| Biotinidase inhibitor                                   | 0,418 | 0,127 |
| Lipoprotein lipase inhibitor                            | 0,304 | 0,014 |
| Rubredoxin-NAD <sup>+</sup> reductase inhibitor         | 0,327 | 0,039 |
| D-alanine 2-hydroxymethyltransferase inhibitor          | 0,425 | 0,138 |
| Aryl sulfotransferase inhibitor                         | 0,358 | 0,072 |
| Prostaglandin-E2 9-reductase inhibitor                  | 0,325 | 0,040 |
| TP53 expression enhancer                                | 0,318 | 0,034 |
| Malate dehydrogenase (acceptor) inhibitor               | 0,309 | 0,027 |
| Creatinine deaminase inhibitor                          | 0,346 | 0,064 |
| Cyanoalanine nitrilase inhibitor                        | 0,357 | 0,076 |
| Opine dehydrogenase inhibitor                           | 0,350 | 0,070 |
| Glycerol 2-dehydrogenase (NADP <sup>+</sup> ) inhibitor | 0,326 | 0,046 |
| Antiinflammatory, intestinal                            | 0,304 | 0,029 |
| GABA C receptor agonist                                 | 0,360 | 0,088 |
| Mucomembranous protector                                | 0,326 | 0,054 |
| G-protein-coupled receptor kinase inhibitor             | 0,313 | 0,042 |
| Beta-adrenergic receptor kinase inhibitor               | 0,316 | 0,045 |
| Guanidinoacetase inhibitor                              | 0,369 | 0,099 |
| Glycolate dehydrogenase inhibitor                       | 0,346 | 0,076 |
| Gentisate 1,2-dioxygenase inhibitor                     | 0,328 | 0,058 |
| 4-Hydroxyphenylacetate 3-monooxygenase inhibitor        | 0,322 | 0,054 |

|                                                             |         |       |
|-------------------------------------------------------------|---------|-------|
| L-threonine 3-dehydrogenase inhibitor                       | 0,303   | 0,035 |
| 3-Oxoadipate enol-lactonase inhibitor                       | 0,326   | 0,060 |
| 2-Oxoglutarate decarboxylase inhibitor                      | 0,315   | 0,049 |
| UGT1A9 substrate                                            | 0,341   | 0,076 |
| Cytoprotectant                                              | 0,348   | 0,083 |
| Eye irritation, inactive                                    | 0,341   | 0,077 |
| Glucan 1,6-alpha-glucosidase inhibitor                      | 0,308   | 0,043 |
| HMOX1 expression enhancer                                   | 0,316   | 0,052 |
| 3-Hydroxyphenylacetate 6-hydroxylase inhibitor              | 0,324   | 0,061 |
| Leucolysin inhibitor                                        | 0,371   | 0,110 |
| Phobic disorders treatment                                  | 0,301   | 0,044 |
| Aspartyl aminopeptidase inhibitor                           | 0,339   | 0,083 |
| Glycerol dehydratase inhibitor                              | 0,336   | 0,080 |
| Acylphosphatase inhibitor                                   | 0,367   | 0,113 |
| Camphor 1,2-monooxygenase inhibitor                         | 0,343   | 0,090 |
| CYP2C8 inhibitor                                            | 0,340   | 0,090 |
| Glycerol-1-phosphatase inhibitor                            | 0,314   | 0,066 |
| Hydroxylamine reductase inhibitor                           | 0,359   | 0,112 |
| 1-Alkylglycerophosphocholine O-acetyltransferase inhibitor  | 0,335   | 0,090 |
| Benzaldehyde dehydrogenase (NADP+) inhibitor                | 0,327   | 0,082 |
| N-carbamoyl-L-amino-acid hydrolase inhibitor                | 0,323   | 0,078 |
| N-hydroxy-2-acetamidofluorene reductase inhibitor           | 0,313   | 0,069 |
| CDP-4-dehydro-6-deoxyglucose reductase inhibitor            | 0,327   | 0,082 |
| N-acetyl-gamma-glutamyl-phosphate reductase inhibitor       | 0,311   | 0,067 |
| 2-Haloacid dehalogenase (configuration-inverting) inhibitor | 0,314   | 0,071 |
| Mannan endo-1,6-alpha-mannosidase inhibitor                 | 0,355   | 0,113 |
| UGT2B1 substrate                                            | 0,343   | 0,102 |
| Phenylacetate-CoA ligase inhibitor                          | 0,342   | 0,105 |
| 3-Cyanoalanine hydratase inhibitor                          | 0,328   | 0,094 |
| Monophenol monooxygenase inhibitor                          | 0,311   | 0,078 |
| Centromere associated protein inhibitor                     | 0,347   | 0,114 |
| Transketolase inhibitor                                     | 0,380   | 0,148 |
| Cyclomaltodextrinase inhibitor                              | 0,372   | 0,142 |
| Pyruvate dehydrogenase (cytochrome) inhibitor               | 0,348   | 0,120 |
| Trans-2-enoyl-CoA reductase (NAD+) inhibitor                | 0,384   | 0,156 |
| Inulinase inhibitor                                         | 0,382   | 0,155 |
| Bothrolysin inhibitor                                       | 0,308   | 0,083 |
| Acetylnornithine deacetylase inhibitor                      | 0,307   | 0,085 |
| APOA1 expression enhancer                                   | 0,320   | 0,099 |
| Orcinol 2-monooxygenase inhibitor                           | 0,340   | 0,124 |
| Formate-dihydrofolate ligase inhibitor                      | 0,346   | 0,131 |
| Mediator release inhibitor                                  | 0,361   | 0,150 |
| Pantoate 4-dehydrogenase inhibitor                          | 0,339   | 0,128 |
| Lysine 6-dehydrogenase inhibitor                            | 0,319   | 0,109 |
| 3-Hydroxybutyryl-CoA dehydrogenase inhibitor                | 0,340   | 0,141 |
| 2,4-Diaminopentanoate dehydrogenase inhibitor               | 0,303   | 0,109 |
| Calcium channel (voltage-sensitive) activator               | 7 0,304 | 0,112 |

|                                                                 |       |       |
|-----------------------------------------------------------------|-------|-------|
| tRNA nucleotidyltransferase inhibitor                           | 0,320 | 0,129 |
| MMP9 expression inhibitor                                       | 0,374 | 0,183 |
| Succinate-semialdehyde dehydrogenase [NAD(P)+] inhibitor        | 0,317 | 0,130 |
| Glutathione dehydrogenase (ascorbate) inhibitor                 | 0,352 | 0,168 |
| Quinoprotein glucose dehydrogenase inhibitor                    | 0,309 | 0,125 |
| Glycopeptide alpha-N-acetylgalactosaminidase inhibitor          | 0,349 | 0,168 |
| CYP2J substrate                                                 | 0,302 | 0,138 |
| Anthranilate 3-monooxygenase (deaminating) inhibitor            | 0,324 | 0,173 |
| Phosphoinositide 5-phosphatase inhibitor                        | 0,302 | 0,152 |
| HIF1A expression inhibitor                                      | 0,334 | 0,221 |
| Licheninase inhibitor                                           | 0,342 | 0,231 |
| Chitosanase inhibitor                                           | 0,323 | 0,217 |
| 2-Enoate reductase inhibitor                                    |       |       |
| Protocatechuate 4,5-dioxygenase inhibitor                       |       |       |
| Platelet adhesion inhibitor                                     |       |       |
| Leukotriene-B4 20-monooxygenase inhibitor                       |       |       |
| Pectate lyase inhibitor                                         |       |       |
| Cholesterol antagonist                                          |       |       |
| Fumarate reductase (NADH) inhibitor                             |       |       |
| N-methyl-2-oxoglutaramate hydrolase inhibitor                   |       |       |
| Cytochrome-b5 reductase inhibitor                               |       |       |
| Trans-pentaprenyltranstransferase inhibitor                     |       |       |
| Choleretic                                                      |       |       |
| Catechol 2,3-dioxygenase inhibitor                              |       |       |
| N-Acyl-D-amino-acid deacylase inhibitor                         |       |       |
| Carminative                                                     |       |       |
| MAP kinase stimulant                                            |       |       |
| Thromboxane B2 antagonist                                       |       |       |
| D-lactaldehyde dehydrogenase inhibitor                          |       |       |
| Glyceryl-ether monooxygenase inhibitor                          |       |       |
| Laccase inhibitor                                               |       |       |
| Isopenicillin-N epimerase inhibitor                             |       |       |
| Antimyopathies                                                  |       |       |
| 2,4-Dichlorophenol 6-monooxygenase inhibitor                    |       |       |
| Protein-Npi-phosphohistidine-sugar phosphotransferase inhibitor |       |       |
| L-iduronidase inhibitor                                         |       |       |
| Complement factor D inhibitor                                   |       |       |
| Oxygen scavenger                                                |       |       |
| Oxidoreductase inhibitor                                        |       |       |
| CYP2J2 substrate                                                |       |       |
| Hippurate hydrolase inhibitor                                   |       |       |
| Catechol oxidase inhibitor                                      |       |       |
| 1-Acylglycerol-3-phosphate O-acyltransferase inhibitor          |       |       |
| Aspartyltransferase inhibitor                                   |       |       |
| Free radical scavenger                                          |       |       |
| Phosphatidylglycerophosphatase inhibitor                        |       |       |
| 15-Hydroxyprostaglandin-D dehydrogenase (NADP+) inhibitor       |       |       |

Alcohol oxidase inhibitor  
Glycosylphosphatidylinositol phospholipase D inhibitor  
Beta-amylase inhibitor  
Alpha-N-acetylglucosaminidase inhibitor  
Manganese peroxidase inhibitor  
UDP-glucuronosyltransferase substrate  
Histamine release stimulant  
4-Alpha-glucanotransferase inhibitor  
Membrane integrity antagonist  
Ethanolamine-phosphate cytidyltransferase inhibitor  
Mannose isomerase inhibitor  
Glycerol-3-phosphate dehydrogenase inhibitor  
D-amino-acid dehydrogenase inhibitor  
Ferredoxin-nitrite reductase inhibitor  
Dimethylmaleate hydratase inhibitor  
Ecdysone 20-monooxygenase inhibitor  
Phenylalanine(histidine) transaminase inhibitor  
Lipid metabolism regulator  
Methylumbelliferyl-acetate deacetylase inhibitor  
Protocatechuate 3,4-dioxygenase inhibitor  
P-benzoquinone reductase (NADPH) inhibitor  
Antiviral (Influenza)  
Keratolytic  
Arylesterase inhibitor  
Histamine release inhibitor  
Plasmanylethanolamine desaturase inhibitor  
Para amino benzoic acid antagonist  
O-aminophenol oxidase inhibitor  
Lombricine kinase inhibitor  
Vomilenine glucosyltransferase inhibitor  
Skin irritation, inactive  
Glucan 1,4-beta-glucosidase inhibitor  
Leukopoiesis inhibitor  
3,4-Dihydroxy-9,10-secoandrosta-1,3,5(10)-triene-9,17-dione 4,5-dioxygenase inh  
L-amino-acid oxidase inhibitor  
Methylaspartate ammonia-lyase inhibitor  
TNF expression inhibitor  
Gly-X carboxypeptidase inhibitor  
Sulfite dehydrogenase inhibitor  
Glucan endo-1,3-alpha-glucosidase inhibitor  
Phthalate 4,5-dioxygenase inhibitor  
Beta glucuronidase inhibitor  
Sphinganine-1-phosphate aldolase inhibitor  
AR expression inhibitor  
3-Aminobutyryl-CoA ammonia-lyase inhibitor  
5 Hydroxytryptamine release inhibitor  
GABA aminotransferase inhibitor

Phosphoglycerate mutase inhibitor  
Acetate kinase inhibitor  
Pin1 inhibitor  
Glutaminase inhibitor  
Dihydroxy-acid dehydratase inhibitor  
Glycerol dehydrogenase (NADP+) inhibitor  
Cardiovascular analeptic  
N-(long-chain-acyl)ethanolamine deacylase inhibitor  
RELA expression inhibitor  
X-methyl-His dipeptidase inhibitor  
Plastoquinol-plastocyanin reductase inhibitor  
DNA-3-methyladenine glycosylase I inhibitor  
Carboxypeptidase Taq inhibitor  
Galactose oxidase inhibitor  
Ubiquitin thiolesterase inhibitor  
Histone acetyltransferase inhibitor  
Myosin ATPase inhibitor  
Erythropoiesis stimulant  
2,3-Dihydroxyindole 2,3-dioxygenase inhibitor  
Clavamate synthase inhibitor  
Acylcarnitine hydrolase inhibitor  
Sigma receptor agonist  
Trimethylamine dehydrogenase inhibitor  
DNA-(apurinic or apyrimidinic site) lyase inhibitor  
Lysostaphin inhibitor  
Quinate 5-dehydrogenase inhibitor  
Succinate-semialdehyde dehydrogenase inhibitor  
Antipyretic  
Glucuronate isomerase inhibitor  
Orotate reductase (NADPH) inhibitor  
Cyclamate sulfohydrolase inhibitor  
Trimethylamine-oxide aldolase inhibitor  
Cyclic AMP agonist  
Lipid peroxidase inhibitor  
Malate oxidase inhibitor  
Anti-amyloidogenic  
Pseudouridylyl synthase inhibitor  
Nicotinic  $\alpha_6\beta_3\beta_4\alpha_5$  receptor antagonist  
CYP2E1 inducer  
Aldehyde dehydrogenase (NADP+) inhibitor  
Leucine dehydrogenase inhibitor  
Antidyskinetic  
Coccolysin inhibitor  
Adenomatous polyposis treatment  
FMO1 substrate  
CYP2A substrate  
Choline-phosphate cytidylyltransferase inhibitor

(S)-3-hydroxyacid ester dehydrogenase inhibitor  
Gallate decarboxylase inhibitor  
Adenylyl-sulfate reductase inhibitor  
UGT1A substrate  
Cathepsin T inhibitor  
Glucosamine-6-phosphate deaminase inhibitor  
2-Dehydropantolactone reductase (A-specific) inhibitor  
Arylsulfatase inhibitor  
Acetylcholine neuromuscular blocking agent  
Thiol oxidase inhibitor  
Arylformamidase inhibitor  
Pyroglutamyl-peptidase II inhibitor  
Leukotriene-C4 synthase inhibitor  
UGT1A1 substrate  
UGT1A7 substrate  
CYP2C9 substrate  
Procollagen N-endopeptidase inhibitor  
Alcohol O-acetyltransferase inhibitor  
Diisopropyl-fluorophosphatase inhibitor  
Glutamate decarboxylase inhibitor  
Antipruritic, allergic  
Neurotransmitter antagonist  
Peptide-tryptophan 2,3-dioxygenase inhibitor  
Alanine-tRNA ligase inhibitor  
Radioprotector  
Cyclopentanone monooxygenase inhibitor  
Nucleotide metabolism regulator  
Leukopoiesis stimulant  
Polyporopepsin inhibitor  
Allantoinase inhibitor  
Radiosensitizer  
CYP2A6 substrate  
Pseudolysin inhibitor  
Phosphatidylcholine-sterol O-acyltransferase inhibitor  
Glycerol-3-phosphate oxidase inhibitor  
Acyl-lysine deacylase inhibitor  
NADPH oxidase inhibitor  
Sulfur reductase inhibitor  
Caspase 8 stimulant  
Acylaminoacyl-peptidase inhibitor  
Indoleacetaldoxime dehydratase inhibitor  
UGT2B12 substrate  
Retinal dehydrogenase inhibitor  
2,3,4,5-Tetrahydropyridine-2,6-dicarboxylate N-succinyltransferase inhibitor  
Thiosulfate dehydrogenase inhibitor  
NAD<sup>+</sup> synthase (glutamine-hydrolysing) inhibitor  
Acaricide

Macrophage colony stimulating factor agonist  
4-Hydroxybenzoate nonaprenyltransferase inhibitor  
Glucose 1-dehydrogenase inhibitor  
Expectorant  
Sweetener  
Hepatoprotectant  
Antinociceptive  
4-Phytase inhibitor  
Vasodilator, peripheral  
Alkylacetylgllycerophosphatase inhibitor  
N-acetyllactosamine synthase inhibitor  
UGT2B substrate  
Thiamine pyridinylase inhibitor  
Hemostatic  
Apoptosis agonist  
Cytostatic  
Phosphatase inhibitor  
D-threo-aldose 1-dehydrogenase inhibitor  
Protein-glucosylgalactosylhydroxylysine glucosidase inhibitor  
Nitrate reductase inhibitor  
Alpha-N-arabinofuranosidase inhibitor  
GST A substrate  
UGT1A10 substrate  
Aspergillus nuclease S1 inhibitor  
Muscular dystrophy treatment  
Glucan 1,4-alpha-maltotriohydrolase inhibitor  
Thiopurine S-methyltransferase inhibitor  
Caspase 3 stimulant  
Alpha-glucuronidase inhibitor  
Enteropeptidase inhibitor  
Cellulase inhibitor  
Alcohol dehydrogenase [NAD(P)+] inhibitor  
Cyclic AMP phosphodiesterase inhibitor  
Acetylenecarboxylate hydratase inhibitor  
Dihydrodipicolinate reductase inhibitor  
Reductant  
Hydroxymethylbilane synthase inhibitor  
Venombin AB inhibitor  
Indolepyruvate C-methyltransferase inhibitor  
Antiviral (Picornavirus)  
Carboxypeptidase D inhibitor  
Tyrosine-ester sulfotransferase inhibitor  
4-Hydroxybenzoate-CoA ligase inhibitor  
Chloramphenicol O-acetyltransferase inhibitor  
CYP2B6 substrate  
Gamma-glutamyltransferase inhibitor  
Phosphopantothenoylecysteine decarboxylase inhibitor

CYP19A1 expression inhibitor  
Glutathione peroxidase inhibitor  
Mandelate 4-monooxygenase inhibitor  
Guanidinoacetate N-methyltransferase inhibitor  
Aspartate-tRNA ligase inhibitor  
Indanol dehydrogenase inhibitor  
2-Pyrocatechuate decarboxylase inhibitor  
Endo-1,4-beta-xylanase inhibitor  
Pitrilysin inhibitor  
CDP-diacylglycerol-serine O-phosphatidyltransferase inhibitor  
Alpha-amylase inhibitor  
4-Chlorobenzoyl-CoA dehalogenase inhibitor  
DOPA decarboxylase inhibitor  
Histidine decarboxylase inhibitor  
Sulfur dioxygenase inhibitor  
Loop diuretic  
Benzoylformate decarboxylase inhibitor  
Beta-mannosidase inhibitor  
Prephenate dehydrogenase inhibitor  
Trimethylamine-N-oxide reductase inhibitor  
Blasticidin-S deaminase inhibitor  
Glycine dehydrogenase (decarboxylating) inhibitor  
Glyoxylate reductase (NADP+) inhibitor  
Haloacetate dehalogenase inhibitor  
Prepilin peptidase inhibitor  
Farnesyltranstransferase inhibitor  
CYP3A5 substrate  
Phenylacetaldehyde dehydrogenase inhibitor  
Membrane permeability enhancer  
Glucan 1,4-alpha-maltotetraohydrolase inhibitor  
Antihypercholesterolemic  
Acid phosphatase inhibitor  
Glutamate-tRNA ligase inhibitor  
4-Hydroxybenzoate 3-monooxygenase inhibitor  
Antipsoriatic  
3'-Nucleotidase inhibitor  
Vasoprotector  
Alkylglycerophosphoethanolamine phosphodiesterase inhibitor  
Iodide peroxidase inhibitor  
Antiviral (Adenovirus)  
Serine 3-dehydrogenase inhibitor  
CYP2C substrate  
4-Hydroxymandelate oxidase inhibitor  
Nitrite reductase (NO-forming) inhibitor  
Carboxymethylenebutenolidase inhibitor  
L-ascorbate peroxidase inhibitor  
Carnosine synthase inhibitor



Protein-disulfide reductase (glutathione) inhibitor  
Thioredoxin inhibitor  
Cysteine-S-conjugate beta-lyase inhibitor  
Sedoheptulose-bisphosphatase inhibitor  
L-galactonolactone oxidase inhibitor  
Phenol 2-monooxygenase inhibitor  
Ferrochelataase inhibitor  
CYP2A5 substrate  
CYP4A substrate  
Catalase inhibitor  
Venom exonuclease inhibitor  
Ompin inhibitor  
Isoquinoline 1-oxidoreductase inhibitor  
Arylmalonate decarboxylase inhibitor  
Chitinase inhibitor  
Glycogen synthase stimulant  
Gingipain K inhibitor  
[acyl-carrier-protein] S-acetyltransferase inhibitor  
Ovulation inhibitor  
2,2-Dialkylglycine decarboxylase (pyruvate) inhibitor  
TRPA1 agonist  
5 Hydroxytryptamine release stimulant  
Hydroxylamine oxidase inhibitor  
CYP2A4 substrate  
Alopecia treatment  
Glycine amidinotransferase inhibitor  
Tryptophan transaminase inhibitor  
Aspartoacylase inhibitor  
3-Phytase inhibitor  
Penicillin amidase inhibitor  
Guanidinoacetate kinase inhibitor  
DNA ligase (ATP) inhibitor  
NAD(P)<sup>+</sup>-arginine ADP-ribosyltransferase inhibitor  
Phenylalanine decarboxylase inhibitor  
N-Carbamoyl-D-amino acid hydrolase inhibitor  
Pyruvate dehydrogenase inhibitor  
D-lactate dehydrogenase (cytochrome) inhibitor  
Protein-glutamate methylesterase inhibitor  
D-2-hydroxy-acid dehydrogenase inhibitor  
Cardioprotectant  
Alcohol dehydrogenase (NADP<sup>+</sup>) inhibitor  
Analeptic  
Xaa-Pro dipeptidyl-peptidase inhibitor  
GST M substrate  
ATP phosphoribosyltransferase inhibitor  
Phosphoenolpyruvate-protein phosphotransferase inhibitor  
Platelet aggregation stimulant

Pyridoxine 5-dehydrogenase inhibitor  
Pyruvate dehydrogenase (lipoamide) inhibitor  
Glycine-tRNA ligase inhibitor  
Nicotinamidase inhibitor  
Deoxyribonuclease I inhibitor  
Inorganic diphosphatase inhibitor  
Antiinflammatory  
Rhodotorulapepsin inhibitor  
General pump inhibitor  
Antiuremic  
Endothelial growth factor antagonist  
Pim-1 kinase inhibitor  
N-formylmethionyl-peptidase inhibitor  
2-Oxoisovalerate dehydrogenase (acylating) inhibitor  
Insulin promoter  
Vasodilator, coronary  
3-Hydroxyacyl-CoA dehydrogenase inhibitor  
Chemopreventive  
Aromatic-hydroxylamine O-acetyltransferase inhibitor  
Valine dehydrogenase (NADP+) inhibitor  
Peptidoglycan glycosyltransferase inhibitor  
CYP2C8 substrate  
Antithrombotic  
Imidazoleacetate 4-monooxygenase inhibitor  
Aconitate decarboxylase inhibitor  
Ferredoxin hydrogenase inhibitor  
Acetoin dehydrogenase inhibitor  
Cerebroside-sulfatase inhibitor  
Omega-amidase inhibitor  
Antiallergic  
Gastrin inhibitor  
Antiviral (Rhinovirus)  
Bile-salt sulfotransferase inhibitor  
Nitrilase inhibitor  
4-Hydroxybenzoate decarboxylase inhibitor  
Respiratory analeptic  
Acetylgalactosaminyl-O-glycosyl-glycoprotein beta-1,3-N-acetylglucosaminyltrans  
UGT2B4 substrate  
Carboxylesterase inhibitor  
4,5-Dihydroxyphthalate decarboxylase inhibitor  
Dopamine release stimulant  
Ribitol 2-dehydrogenase inhibitor  
Dermatologic  
Antituberculosic  
5 Hydroxytryptamine uptake stimulant  
Xylose isomerase inhibitor  
NF-E2-related factor 2 stimulant

Maillard reaction inhibitor  
Mannosyl-glycoprotein endo-beta-N-acetylglucosaminidase inhibitor  
Di-trans,poly-cis-decaprenylcistransferase inhibitor  
Formaldehyde dehydrogenase inhibitor  
Retinoic acid metabolism inhibitor  
Morphine 6-dehydrogenase inhibitor  
CYP1A inducer  
D-cysteine desulfhydrase inhibitor  
(R,R)-butanediol dehydrogenase inhibitor  
CYP2C19 substrate  
N-acetylneuraminate lyase inhibitor  
Sulfate adenylyltransferase (ADP) inhibitor  
Undecaprenyl-diphosphatase inhibitor  
Acylglycerone-phosphate reductase inhibitor  
Creatinase inhibitor  
Phosphatidate phosphatase inhibitor  
Shikimate O-hydroxycinnamoyltransferase inhibitor  
Vanilloid 1 agonist  
Alpha-L-rhamnosidase inhibitor  
Octopamine antagonist  
Apyrase inhibitor  
CYP2C9 inducer  
Malate dehydrogenase inhibitor  
Galacturan 1,4-alpha-galacturonidase inhibitor  
GABA transporter 3 inhibitor  
CYP2D15 substrate  
Glutamin-(asparagin-)ase inhibitor  
Xylan 1,4-beta-xylosidase inhibitor  
Glutathione-disulfide reductase inhibitor  
CYP3A3 substrate  
4-Hydroxybenzoate 1-hydroxylase inhibitor  
Deoxyribonuclease (pyrimidine dimer) inhibitor  
Deoxyribose-phosphate aldolase inhibitor  
N-acetylneuraminate 4-O-acetyltransferase inhibitor  
Carboxylate reductase inhibitor  
Diamine N-acetyltransferase inhibitor  
Metallocoarboxypeptidase D inhibitor  
1,5-Anhydro-D-fructose reductase inhibitor  
Alpha-pinene-oxide decyclase inhibitor  
Tauropine dehydrogenase inhibitor  
CYP2C6 substrate  
3<sup>1</sup>-Demethylstaurosporine O-methyltransferase inhibitor  
Galactokinase inhibitor  
Dolichyl-diphosphooligosaccharide-protein glycotransferase inhibitor  
Dementia treatment  
Mandelate racemase inhibitor  
Pyridoxine 4-oxidase inhibitor

Valine decarboxylase inhibitor  
CYP2A1 substrate  
Guanidinodeoxy-scylo-inositol-4-phosphatase inhibitor  
NOS2 expression inhibitor  
Undecaprenyldiphospho-muramoylpentapeptide beta-N-acetylglucosaminyltransf  
Cystathionine beta-synthase inhibitor  
Cl--transporting ATPase inhibitor  
Antipruritic  
Carnitine dehydratase inhibitor  
Acetolactate decarboxylase inhibitor  
Orotate reductase (NADH) inhibitor  
Age-related macular degeneration treatment  
CDP-diacylglycerol-glycerol-3-phosphate 3-phosphatidyltransferase inhibitor  
Glutathione synthase inhibitor  
CYP3A4 inducer  
Inositol oxygenase inhibitor  
RNA-directed RNA polymerase inhibitor  
Lactate 2-monooxygenase inhibitor  
Sigma 1 receptor agonist  
Horriylsin inhibitor  
EIF4E expression inhibitor  
Aldehyde ferredoxin oxidoreductase inhibitor  
Glutamate 5-kinase inhibitor  
CYP2C18 substrate  
Gastritis treatment  
Alcohol dehydrogenase (acceptor) inhibitor  
Pediculicide  
2-Hydroxy-3-oxoadipate synthase inhibitor  
Fibrolase inhibitor  
Gonadotropin antagonist  
Amyloid beta aggregation inhibitor  
Alkaline phosphatase inhibitor  
Laminaribiose phosphorylase inhibitor  
Prunasin beta-glucosidase inhibitor  
Antinephritic  
Porphobilinogen synthase inhibitor  
Cytochrome-c3 hydrogenase inhibitor  
Antioxidant  
Aldehyde dehydrogenase [NAD(P)+] inhibitor  
Peptidyl-dipeptidase Dcp inhibitor  
Photosensitizer  
Antihypoxic  
Mitochondrial intermediate peptidase inhibitor  
Antisecretoric  
Alpha-Methylacyl-CoA racemase inhibitor  
Transthyretin amyloid fibril formation inhibitor  
Malate-CoA ligase inhibitor

Antimycobacterial  
Thiamine-phosphate kinase inhibitor  
Asparagine-tRNA ligase inhibitor  
Histidinol dehydrogenase inhibitor  
Laxative  
Deacetoxycephalosporin-C synthase inhibitor  
Aminoacylase inhibitor  
Bilirubin oxidase inhibitor  
CYP3A inducer  
UGT1A8 substrate  
Antiprotozoal (Amoeba)  
Xanthine oxidase inhibitor  
Cellulose 1,4-beta-cellobiosidase inhibitor  
Uric acid excretion stimulant  
Anticarcinogenic  
CYP4A11 substrate  
Aminopeptidase Y inhibitor  
Diuretic inhibitor  
Anesthetic general  
Trans-1,2-dihydrobenzene-1,2-diol dehydrogenase inhibitor  
Fucosterol-epoxide lyase inhibitor  
Sorbose dehydrogenase inhibitor  
Malonate-semialdehyde dehydrogenase inhibitor  
Prion diseases treatment  
Iron-cytochrome-c reductase inhibitor  
CYP2D16 substrate  
Magnesium-protoporphyrin IX methyltransferase inhibitor  
UGT1A3 substrate  
Glutamate-1-semialdehyde 2,1-aminomutase inhibitor  
(S)-2-hydroxy-acid oxidase inhibitor  
CYP2E1 substrate  
3,4-Dihydroxyphenylacetate 2,3-dioxygenase inhibitor  
1,2-alpha-L-fucosidase inhibitor  
DNA-3-methyladenine glycosylase II inhibitor  
3-Oxosteroid 1-dehydrogenase inhibitor  
CYP2B10 substrate  
Isoamylase inhibitor  
Glutamate (mGluR5) agonist  
CTGF expression inhibitor  
ICAM1 expression inhibitor  
Galactose 1-dehydrogenase (NADP+) inhibitor  
Beta-alanine-pyruvate transaminase inhibitor  
Mepripin B inhibitor  
D-lactate dehydrogenase inhibitor  
Antidote  
Homogentisate 1,2-dioxygenase inhibitor  
Mucolytic

Antifibrinolytic  
Hyaluronic acid agonist  
CYP2E substrate  
Leucine transaminase inhibitor  
tRNA adenylyltransferase inhibitor  
Phosphoinositide phospholipase C inhibitor  
Ferredoxin-NADP+ reductase inhibitor  
UGT2B17 substrate  
Sorbitol-6-phosphate 2-dehydrogenase inhibitor  
L-fuconate dehydratase inhibitor  
Serratia marcescens nuclease inhibitor  
Oxalate oxidase inhibitor  
Sterol 3-beta-glucosyltransferase inhibitor  
Formate dehydrogenase inhibitor  
Methanol dehydrogenase inhibitor  
Carnitine 3-dehydrogenase inhibitor  
Skin whitener  
Menopausal disorders treatment  
D-arabinonolactone oxidase inhibitor  
CYP3A2 substrate  
Non-steroidal antiinflammatory agent  
Gluconate dehydratase inhibitor  
Thioredoxin reductase inhibitor  
Antibacterial  
(S)-3-amino-2-methylpropionate transaminase inhibitor  
Acetate-CoA ligase inhibitor  
Muramoyltetrapeptide carboxypeptidase inhibitor  
Opioid kappa 3 receptor antagonist  
Tyrosine 3 hydroxylase inhibitor  
Chloride peroxidase inhibitor  
FMN reductase inhibitor  
UGT1A4 substrate  
Arylamine N-acetyltransferase inhibitor  
Choline kinase inhibitor  
CYP2B substrate  
Glucarate dehydratase inhibitor  
Serum-glucocorticoid regulated kinase 1 inhibitor  
UGT2B7 substrate  
Sickle-cell anemia treatment  
Cell wall biosynthesis inhibitor  
Glucosamine-1-phosphate N-acetyltransferase inhibitor  
Linoleoyl-CoA desaturase inhibitor  
Antihelminthic (Nematodes)  
UGT2B15 substrate  
Lactaldehyde reductase (NADPH) inhibitor  
Choline dehydrogenase inhibitor  
Phospholipase C inhibitor

Phosphoenolpyruvate mutase inhibitor  
Endo-1,3(4)-beta-glucanase inhibitor  
Aryl-aldehyde dehydrogenase (NADP+) inhibitor  
Histidine kinase inhibitor  
Choline-sulfatase inhibitor  
Inositol-polyphosphate 5-phosphatase inhibitor  
Butyrate-CoA ligase inhibitor  
Succinate dehydrogenase inhibitor  
Cysteine desulfurase inhibitor  
Antiperistaltic  
3-Dehydroquinase synthase inhibitor  
3C-like protease (Human coronavirus) inhibitor  
NADH dehydrogenase inhibitor  
Glucan 1,3-beta-glucosidase inhibitor  
Diiodotyrosine transaminase inhibitor  
Vasodilator  
Aspartate racemase inhibitor  
Cell adhesion molecule inhibitor  
Antiinflammatory, ophthalmic  
Gout treatment  
Dichloromuconate cycloisomerase inhibitor  
CYP2D2 inhibitor  
Adenylyl-sulfate kinase inhibitor  
Proteasome endopeptidase complex inhibitor  
Aspartate transaminase inhibitor  
Nicotinic alpha2beta2 receptor antagonist  
Isovaleryl-CoA dehydrogenase inhibitor  
ATP adenylyltransferase inhibitor  
Acyl-CoA oxidase inhibitor  
Urate-ribonucleotide phosphorylase inhibitor  
P-glycoprotein substrate  
5-Oxoprolinase (ATP-hydrolysing) inhibitor  
4-Nitrophenylphosphatase inhibitor  
Calcium channel activator  
Cyclopropane-fatty-acyl-phospholipid synthase inhibitor  
Cholesterol synthesis inhibitor  
Antiprotozoal (Coccidial)  
CYP3A1 substrate  
27-Hydroxycholesterol 7alpha-monooxygenase inhibitor  
Iduronate-2-sulfatase inhibitor  
Dipeptidase E inhibitor  
Antidiabetic symptomatic  
ATPase inhibitor  
Antineoplastic  
Testosterone 17beta-dehydrogenase inhibitor  
Hexokinase inhibitor  
Oxidizing agent

Pancreatic elastase inhibitor  
Alanine transaminase inhibitor  
Xenobiotic-transporting ATPase inhibitor  
Transcription factor NF kappa A inhibitor  
6,7-Dihydropteridine reductase inhibitor  
Cysteine synthase inhibitor  
CYP1A1 inhibitor  
Tetrahydroxynaphthalene reductase inhibitor  
Lactose synthase inhibitor  
Antiprotozoal (Trypanosoma)  
Antiviral (Herpes)  
Haloalkane dehalogenase inhibitor  
Spasmolytic, Papaverin-like  
6-Methylsalicylate decarboxylase inhibitor  
Antiviral (CMV)  
Muconate cycloisomerase inhibitor  
Glycine transaminase inhibitor  
Allophanate hydrolase inhibitor  
Lysyl oxidase inhibitor  
CDP-glycerol glycerophosphotransferase inhibitor  
Gamma-D-Glutamyl-meso-diaminopimelate peptidase inhibitor  
RNA synthesis inhibitor  
Phosphoenolpyruvate carboxykinase (diphosphate) inhibitor  
Dual specificity phosphatase inhibitor  
Oxaloacetate decarboxylase inhibitor  
Severe acute respiratory syndrome treatment  
Saccharopine dehydrogenase (NAD<sup>+</sup>, L-lysine-forming) inhibitor  
CYP2F1 substrate  
Saccharopine dehydrogenase (NADP<sup>+</sup>, L-glutamate-forming) inhibitor  
Phenylalanine 4-hydroxylase inhibitor  
Maltose-transporting ATPase inhibitor  
FMO3 substrate  
Maleate isomerase inhibitor  
CYP2B5 substrate  
Glycogen (starch) synthase inhibitor  
Formaldehyde dehydrogenase (glutathione) inhibitor  
Aspartate-ammonia ligase (ADP-forming) inhibitor  
Mannonate dehydratase inhibitor  
UGT2B9 substrate  
D-glutamate oxidase inhibitor  
UDP-glucose-hexose-1-phosphate uridylyltransferase inhibitor  
Aldehyde dehydrogenase inhibitor  
Thiosulfate sulfurtransferase inhibitor  
Nitric oxide scavenger  
Myc inhibitor  
Nitrile hydratase inhibitor  
Diaminopimelate dehydrogenase inhibitor



Acetylserotonin O-methyltransferase inhibitor  
Antitussive  
Serine-phosphoethanolamine synthase inhibitor  
Pyruvate carboxylase inhibitor  
Inotropic  
UGT1A5 substrate  
Antifungal  
Mevalonate kinase inhibitor  
Cystathionine gamma-lyase inhibitor  
Fibrinogen receptor antagonist  
Sclerosant  
Quinoline-4-carboxylate 2-oxidoreductase inhibitor  
Tagaturonate reductase inhibitor  
Fructuronate reductase inhibitor  
Dihydropyrimidinase inhibitor  
Antipruritic, non-allergic  
Oligo-1,6-glucosidase inhibitor  
NAD<sup>+</sup> kinase inhibitor  
Acyl-CoA hydrolase inhibitor  
Palmitoyl-CoA hydrolase inhibitor  
UDP-glucose 4-epimerase inhibitor  
Glyceraldehyde-3-phosphate dehydrogenase (phosphorylating) inhibitor  
(S)-6-hydroxynicotine oxidase inhibitor  
Pyridoxamine-phosphate oxidase inhibitor  
Thyroxine 5-deiodinase inhibitor  
Simian immunodeficiency virus proteinase inhibitor  
VCAM1 expression inhibitor  
Spasmolytic, urinary  
Fibroblast growth factor agonist  
Gametolysin inhibitor  
Tryptophan 2,3-dioxygenase inhibitor  
Choloylglycine hydrolase inhibitor  
Erythro-3-hydroxyaspartate ammonia-lyase inhibitor  
Nicotinic alpha4beta4 receptor agonist  
Pappalysin-1 inhibitor  
Propanediol dehydratase inhibitor  
L-3-cyanoalanine synthase inhibitor  
Nucleoside oxidase (H<sub>2</sub>O<sub>2</sub>-forming) inhibitor  
HIV-1 integrase (3'-Processing) inhibitor  
Sulfate adenylyltransferase inhibitor  
Snapalysin inhibitor  
D-stereospecific aminopeptidase inhibitor  
SMN2 expression enhancer  
Triose-phosphate isomerase inhibitor  
Anti-Helicobacter pylori  
Proline racemase inhibitor  
Vascular (periferal) disease treatment

Succinate-CoA ligase (ADP-forming) inhibitor  
Cytochrome P450 stimulant  
Aureolysin inhibitor  
N6-methyl-lysine oxidase inhibitor  
Pyroglutamyl-peptidase I inhibitor  
CYP2C29 substrate  
Phosphatidate cytidyltransferase inhibitor  
Antineoplastic (non-Hodgkin's lymphoma)  
DNA synthesis inhibitor  
UGT2B10 substrate  
Protein-arginine deiminase inhibitor  
Hypolipemic  
Antiprotozoal (Toxoplasma)  
CYP2A3 substrate  
Vitamin-K-epoxide reductase (warfarin-insensitive) inhibitor  
Ethanolinphosphotransferase inhibitor  
CYP3A7 substrate  
Glycerol dehydrogenase inhibitor  
Interleukin 10 agonist  
Proteasome ATPase inhibitor  
Peptidylamidoglycolate lyase inhibitor  
Tripeptide aminopeptidase inhibitor  
Protein phosphatase inhibitor  
All-trans-retinyl-palmitate hydrolase inhibitor  
Immunosuppressant  
CYP3A substrate  
Antineoplastic (small cell lung cancer)  
CYP7 inhibitor  
CYP1A1 inducer  
Antianginal  
Endopeptidase So inhibitor  
CYP3A4 substrate  
CYP2A11 substrate  
2-Acylglycerol O-acyltransferase inhibitor  
Proliferative diseases treatment  
Antiprotozoal (Leishmania)  
Methane monooxygenase inhibitor  
CYP2B11 substrate  
Bisphosphoglycerate mutase inhibitor  
Opioid dependency treatment  
Acidifying agent non gastric  
Thiamine-triphosphatase inhibitor  
CYP1A2 substrate  
Calcium regulator  
Intermittent claudication treatment  
Spasmolytic  
CYP1A substrate

Phosphatidylinositol diacylglycerol-lyase inhibitor  
Acute neurologic disorders treatment  
Endopeptidase La inhibitor  
Aspergillopepsin I inhibitor  
CYP2C10 substrate  
2-Haloacid dehalogenase inhibitor  
Diabetic neuropathy treatment  
Antineurogenic pain  
Mycothiol-S-conjugate amidase inhibitor  
Cancer associated disorders treatment  
Antiasthmatic  
CYP1A inhibitor  
Lactase inhibitor  
Transcription factor NF kappa B stimulant  
Transcription factor stimulant  
Antiulcerative  
Na<sup>+</sup>-transporting two-sector ATPase inhibitor  
Antineurotic  
Chemosensitizer  
Kinase inhibitor  
Nootropic

or







































| Activity                                       | Ascorbic acid |       | Activity                            |
|------------------------------------------------|---------------|-------|-------------------------------------|
|                                                | Pa            | Pi    |                                     |
| Membrane integrity agonist                     | 0,948         | 0,002 | Vasoprotector                       |
| Choleretic                                     | 0,928         | 0,003 | Antioxidant                         |
| Membrane permeability inhibitor                | 0,896         | 0,001 | Procollagen-lysine 5-dioxygenase i  |
| Free radical scavenger                         | 0,894         | 0,005 | Acute neurologic disorders treatm   |
| Lipid peroxidase inhibitor                     | 0,889         | 0,001 | Oxygen scavenger                    |
| Oxidoreductase inhibitor                       | 0,881         | 0,009 | Ubiquinol-cytochrome-c reductase    |
| Anticarcinogenic                               | 0,871         | 0,001 | Sedoheptulose-bisphosphatase inf    |
| Chemopreventive                                | 0,864         | 0,003 | Reductant                           |
| HIF1A expression inhibitor                     | 0,845         | 0,001 | Chemoprotective                     |
| Phosphatase inhibitor                          | 0,859         | 0,018 | Aspulvinone dimethylallyltransfera  |
| Antieczematic                                  | 0,835         | 0,002 | Endo-1,3(4)-beta-glucanase inhibit  |
| Antioxidant                                    | 0,830         | 0,001 | Glutathione dehydrogenase (ascor    |
| Proliferative diseases treatment               | 0,833         | 0,012 | Sugar-phosphatase inhibitor         |
| Antineoplastic                                 | 0,822         | 0,006 | Glucan endo-1,6-beta-glucosidase    |
| Feruloyl esterase inhibitor                    | 0,818         | 0,003 | Beta-mannosidase inhibitor          |
| Quinate 5-dehydrogenase inhibitor              | 0,807         | 0,002 | L-iduronidase inhibitor             |
| Antihypoxic                                    | 0,812         | 0,012 | Mannotetraose 2-alpha-N-acetylgl    |
| Mucomembranous protector                       | 0,797         | 0,001 | Glycosylceramidase inhibitor        |
| 4-Coumarate-CoA ligase inhibitor               | 0,788         | 0,004 | Lipid peroxidase inhibitor          |
| G-protein-coupled receptor kinase inhibitor    | 0,787         | 0,002 | Galactose oxidase inhibitor         |
| Beta-adrenergic receptor kinase inhibitor      | 0,801         | 0,018 | Alkenylglycerophosphocholine hyc    |
| UDP-glucuronosyltransferase substrate          | 0,815         | 0,033 | Membrane integrity agonist          |
| Immunosuppressant                              | 0,779         | 0,002 | Acid phosphatase inhibitor          |
| JAK2 expression inhibitor                      | 0,779         | 0,008 | Antiinflammatory                    |
| CDP-glycerol glycerophosphotransferase inhibit | 0,771         | 0,002 | L-galactonolactone oxidase inhibit  |
| Antiprotozoal (Leishmania)                     | 0,772         | 0,003 | Transcription factor stimulant      |
| Sugar-phosphatase inhibitor                    | 0,772         | 0,003 | Transcription factor NF kappa B sti |
| MMP9 expression inhibitor                      | 0,776         | 0,022 | Methylenetetrahydrofolate reduct    |
| Beta glucuronidase inhibitor                   | 0,765         | 0,016 | Glucose oxidase inhibitor           |
| Antipruritic, allergic                         | 0,762         | 0,016 | Feruloyl esterase inhibitor         |
| TP53 expression enhancer                       | 0,729         | 0,004 | Glycopeptide alpha-N-acetylgalact   |
| Trans-acenaphthene-1,2-diol dehydrogenase inl  | 0,723         | 0,002 | Beta-D-fucosidase inhibitor         |
| Selectin P antagonist                          | 0,734         | 0,015 | Ribulose-phosphate 3-epimerase i    |
| Glucose-6-phosphate translocase inhibitor      | 0,714         | 0,005 | Fructan beta-fructosidase inhibitor |
| Antifungal                                     | 0,729         | 0,021 | Sphinganine kinase inhibitor        |
| CYP2J substrate                                | 0,715         | 0,008 | Glucan 1,4-alpha-maltotriohydrola   |
| Alkenylglycerophosphocholine hydrolase inhibit | 0,736         | 0,035 | Chymosin inhibitor                  |
| APOA1 expression enhancer                      | 0,736         | 0,035 | Saccharopepsin inhibitor            |
| Cholesterol antagonist                         | 0,736         | 0,035 | Acrocyllindropepsin inhibitor       |
| Testosterone 17beta-dehydrogenase (NADP+) ir   | 0,713         | 0,015 | UDP-N-acetylglucosamine 4-epime     |
| AR expression inhibitor                        | 0,707         | 0,010 | Mucinaminyserine mucinaminida:      |
| Antipruritic                                   | 0,704         | 0,016 | Antiarthritic                       |
| Antihelminthic (Nematodes)                     | 0,725         | 0,042 | CYP2J substrate                     |
| Caspase 3 stimulant                            | 0,674         | 0,002 | 3-Deoxy-8-phosphooctulonate syn     |

|                                                            |       |       |                                             |
|------------------------------------------------------------|-------|-------|---------------------------------------------|
| Polarisation stimulant                                     | 0,677 | 0,006 | Thymidylate 5'-phosphatase inhibitor        |
| Calcium regulator                                          | 0,687 | 0,018 | Exoribonuclease II inhibitor                |
| GABA aminotransferase inhibitor                            | 0,671 | 0,005 | Licheninase inhibitor                       |
| Hepatoprotectant                                           | 0,695 | 0,034 | CYP2J2 substrate                            |
| Glucan endo-1,6-beta-glucosidase inhibitor                 | 0,700 | 0,040 | Chlordecone reductase inhibitor             |
| Antiinflammatory                                           | 0,671 | 0,018 | Macrophage colony stimulating factor        |
| Apoptosis agonist                                          | 0,705 | 0,053 | Testosterone 17beta-dehydrogenase inhibitor |
| CYP2H substrate                                            | 0,669 | 0,018 | Fucosterol-epoxide lyase inhibitor          |
| Anaphylatoxin receptor antagonist                          | 0,688 | 0,038 | Nicotinic alpha6beta3beta4alpha5            |
| H+-exporting ATPase inhibitor                              | 0,655 | 0,008 | Shikimate O-hydroxycinnamoyltransferase     |
| Ribulose-phosphate 3-epimerase inhibitor                   | 0,664 | 0,021 | 2-Dehydropantoate 2-reductase inhibitor     |
| Mucositis treatment                                        | 0,669 | 0,027 | Dehydro-L-gulonate decarboxylase inhibitor  |
| Hypolipemic                                                | 0,657 | 0,017 | Fatty-acyl-CoA synthase inhibitor           |
| Antineoplastic (non-Hodgkin's lymphoma)                    | 0,648 | 0,008 | H+-exporting ATPase inhibitor               |
| Reductant                                                  | 0,666 | 0,030 | 5-O-(4-coumaroyl)-D-quininate 3'-methyl     |
| Lipid metabolism regulator                                 | 0,682 | 0,052 | Antieczematic                               |
| HMOX1 expression enhancer                                  | 0,654 | 0,025 | Phosphatase inhibitor                       |
| Glycerol-ether monooxygenase inhibitor                     | 0,634 | 0,004 | Antidiabetic symptomatic                    |
| GST A substrate                                            | 0,644 | 0,017 | N-acetylneuraminate 7-O(or 9-O)-methyl      |
| Benzoate-CoA ligase inhibitor                              | 0,671 | 0,044 | CYP2H substrate                             |
| Antimetastatic                                             | 0,630 | 0,008 | Sulfite oxidase inhibitor                   |
| Antiulcerative                                             | 0,681 | 0,060 | CYP2C12 substrate                           |
| Preneoplastic conditions treatment                         | 0,627 | 0,009 | 5 Hydroxytryptamine release inhibitor       |
| Antiviral (Hepatitis B)                                    | 0,621 | 0,003 | Glucan 1,4-beta-glucosidase inhibitor       |
| Antibacterial                                              | 0,634 | 0,016 | Linoleate diol synthase inhibitor           |
| Caspase 8 stimulant                                        | 0,628 | 0,010 | Lactase inhibitor                           |
| Antiviral (Influenza)                                      | 0,621 | 0,004 | Acylphosphatase inhibitor                   |
| Aspartyltransferase inhibitor                              | 0,625 | 0,010 | Malate dehydrogenase (acceptor)             |
| 1-Alkylglycerophosphocholine O-acetyltransferase inhibitor | 0,637 | 0,025 | Proteasome ATPase inhibitor                 |
| Chlordecone reductase inhibitor                            | 0,627 | 0,021 | Manganese peroxidase inhibitor              |
| Transcription factor stimulant                             | 0,618 | 0,013 | Peptide-N4-(N-acetyl-beta-glucosaminide)    |
| Transcription factor NF kappa B stimulant                  | 0,606 | 0,006 | Wound healing agent                         |
| Expectorant                                                | 0,622 | 0,023 | CYP3A2 substrate                            |
| Diphosphomevalonate decarboxylase inhibitor                | 0,604 | 0,007 | Phosphopantothenoilcysteine decarboxylase   |
| Antipsoriatic                                              | 0,600 | 0,004 | Lactose synthase inhibitor                  |
| Fibrinolytic                                               | 0,608 | 0,013 | Chitinase inhibitor                         |
| Radiosensitizer                                            | 0,612 | 0,018 | NAD(P)+-arginine ADP-ribosyltransferase     |
| TNF expression inhibitor                                   | 0,600 | 0,007 | Undecaprenyldiphospho-muramoyltransferase   |
| Ecdysone 20-monooxygenase inhibitor                        | 0,622 | 0,031 | Alkylacetylgllycerophosphatase inhibitor    |
| Thyroxine 5-deiodinase inhibitor                           | 0,622 | 0,031 | G-protein-coupled receptor kinase           |
| Benzoylformate decarboxylase inhibitor                     | 0,622 | 0,031 | Beta-adrenergic receptor kinase inhibitor   |
| CYP2C8 substrate                                           | 0,628 | 0,038 | Acylcarnitine hydrolase inhibitor           |
| Ubiquinol-cytochrome-c reductase inhibitor                 | 0,613 | 0,024 | Pterin deaminase inhibitor                  |
| CDP-diacylglycerol-serine O-phosphatidyltransferase        | 0,598 | 0,013 | Mannan endo-1,4-beta-mannosidase            |
| Phospholipase C inhibitor                                  | 0,584 | 0,001 | D-arabinonolactone oxidase inhibitor        |
| UGT1A1 substrate                                           | 0,605 | 0,022 | Pullulanase inhibitor                       |
| Cyclic AMP agonist                                         | 0,586 | 0,004 | Galacturan 1,4-alpha-galacturonidase        |

|                                                  |       |       |                                     |
|--------------------------------------------------|-------|-------|-------------------------------------|
| Aryl sulfotransferase inhibitor                  | 0,597 | 0,017 | Alkenylglycerophosphoethanolam      |
| 3-Dehydroquinone dehydratase inhibitor           | 0,581 | 0,003 | Adenylyl-sulfate kinase inhibitor   |
| Prephenate dehydrogenase inhibitor               | 0,617 | 0,041 | Antineoplastic                      |
| Cytoprotectant                                   | 0,575 | 0,001 | Sodium-dependent vitamin C tran     |
| Alkenylglycerophosphoethanolamine hydrolase      | 0,579 | 0,006 | Poly(3-hydroxybutyrate) depolyme    |
| UGT1A substrate                                  | 0,611 | 0,038 | Anaphylatoxin receptor antagonist   |
| Glucan endo-1,3-beta-D-glucosidase inhibitor     | 0,593 | 0,021 | CYP3A1 substrate                    |
| Myc inhibitor                                    | 0,579 | 0,012 | Dolichyl-diphosphooligosaccharide   |
| Beta-carotene 15,15'-monooxygenase inhibitor     | 0,614 | 0,049 | Glutamyl endopeptidase II inhibitc  |
| Dermatologic                                     | 0,568 | 0,004 | Alpha-N-arabinofuranosidase inhi    |
| 3-Dehydroquinone synthase inhibitor              | 0,585 | 0,024 | Hydrogen dehydrogenase inhibitor    |
| CYP2C9 substrate                                 | 0,621 | 0,061 | Polyporopepsin inhibitor            |
| Sulfotransferase substrate                       | 0,568 | 0,008 | Mannose isomerase inhibitor         |
| Radioprotector                                   | 0,576 | 0,016 | Sulfite reductase inhibitor         |
| UGT2B substrate                                  | 0,595 | 0,037 | NADPH-cytochrome-c2 reductase       |
| Antiviral (Rhinovirus)                           | 0,567 | 0,009 | Antiviral (Rhinovirus)              |
| RNA synthesis inhibitor                          | 0,564 | 0,007 | Free radical scavenger              |
| Cholesterol synthesis inhibitor                  | 0,560 | 0,004 | Apoptosis antagonist                |
| Glutamate-5-semialdehyde dehydrogenase inhi      | 0,580 | 0,026 | 1,4-Lactonase inhibitor             |
| Monophenol monooxygenase inhibitor               | 0,561 | 0,008 | Hydroxylamine reductase (NADH)      |
| P-glycoprotein substrate                         | 0,574 | 0,021 | Histidine N-acetyltransferase inhi  |
| GST M substrate                                  | 0,563 | 0,010 | D-xylulose reductase inhibitor      |
| Gestagen antagonist                              | 0,578 | 0,024 | Ecdysone 20-monooxygenase inhi      |
| ATPase inhibitor                                 | 0,565 | 0,015 | Levanase inhibitor                  |
| CYP2J2 substrate                                 | 0,579 | 0,029 | Apoptosis agonist                   |
| HIV-1 integrase (3'-Processing) inhibitor        | 0,556 | 0,007 | CDP-diacylglycerol-glycerol-3-phos  |
| Exoribonuclease II inhibitor                     | 0,581 | 0,033 | Lysine 2,3-aminomutase inhibitor    |
| UDP-N-acetylglucosamine 4-epimerase inhibitor    | 0,573 | 0,026 | ADP-thymidine kinase inhibitor      |
| CYP3A5 substrate                                 | 0,564 | 0,018 | Cardiovascular analeptic            |
| Lactase inhibitor                                | 0,551 | 0,009 | Quinoprotein glucose dehydrogen     |
| Fatty-acyl-CoA synthase inhibitor                | 0,574 | 0,033 | Glucan endo-1,3-beta-D-glucosida    |
| HIV-1 integrase inhibitor                        | 0,544 | 0,006 | Sclerosant                          |
| Cytostatic                                       | 0,541 | 0,008 | Styrene-oxide isomerase inhibitor   |
| Platelet adhesion inhibitor                      | 0,610 | 0,079 | CDP-glycerol glycerophosphotrans    |
| HIV-1 integrase (Strand Transfer) inhibitor      | 0,544 | 0,015 | Nitrite reductase (NO-forming) inh  |
| CYP2C substrate                                  | 0,561 | 0,031 | Membrane integrity antagonist       |
| Phosphatidylcholine-retinol O-acyltransferase ir | 0,557 | 0,029 | Immunostimulant                     |
| DNA ligase (ATP) inhibitor                       | 0,573 | 0,046 | Complement factor D inhibitor       |
| Pyruvate decarboxylase inhibitor                 | 0,539 | 0,015 | Peptidoglycan glycosyltransferase   |
| CYP4A11 substrate                                | 0,570 | 0,046 | Protein-disulfide reductase (glutat |
| Melanin inhibitor                                | 0,562 | 0,039 | Platelet aggregation stimulant      |
| Glucan 1,4-beta-glucosidase inhibitor            | 0,534 | 0,010 | 2-Oxoaldehyde dehydrogenase (N.     |
| Antihypercholesterolemic                         | 0,590 | 0,067 | Glycosylphosphatidylinositol phos   |
| RELA expression inhibitor                        | 0,532 | 0,009 | Protein-Npi-phosphohistidine-suga   |
| CYP3A3 substrate                                 | 0,532 | 0,009 | Sorbitol-6-phosphate 2-dehydroge    |
| Antimutagenic                                    | 0,536 | 0,014 | Acetylgalactosaminyl-O-glycosyl-gl  |
| UGT2B4 substrate                                 | 0,540 | 0,018 | Dextranase inhibitor                |

|                                                |       |       |                                      |
|------------------------------------------------|-------|-------|--------------------------------------|
| Vasoprotector                                  | 0,527 | 0,008 | Alpha-N-acetylglucosaminidase in     |
| Antiparasitic                                  | 0,560 | 0,041 | HIF1A expression inhibitor           |
| Antiviral (Herpes)                             | 0,563 | 0,046 | GST A substrate                      |
| Carminative                                    | 0,520 | 0,003 | Thrombolytic                         |
| CYP2A6 substrate                               | 0,539 | 0,022 | CYP2A4 substrate                     |
| ICAM1 expression inhibitor                     | 0,522 | 0,005 | Glucan 1,6-alpha-glucosidase inhi    |
| NADPH-cytochrome-c2 reductase inhibitor        | 0,554 | 0,039 | Arginine 2-monooxygenase inhibit     |
| Antidote                                       | 0,552 | 0,041 | Glyceryl-ether monooxygenase inl     |
| Antiinfective                                  | 0,555 | 0,045 | Carboxypeptidase Taq inhibitor       |
| CYP2B6 substrate                               | 0,509 | 0,002 | Vitamin                              |
| Mucinamylserine mucinaminidase inhibitor       | 0,521 | 0,014 | Cyclomaltodextrinase inhibitor       |
| Fructan beta-fructosidase inhibitor            | 0,514 | 0,009 | Vitamin-K-epoxide reductase (war     |
| GST P substrate                                | 0,529 | 0,026 | Lysostaphin inhibitor                |
| 4-Hydroxybenzoate 3-monooxygenase inhibitor    | 0,522 | 0,019 | Antiulcerative                       |
| Steroid synthesis inhibitor                    | 0,522 | 0,020 | IgA-specific metalloendopeptidase    |
| Antiinflammatory, intestinal                   | 0,536 | 0,038 | Nitrate reductase (cytochrome) in    |
| 3-Phytase inhibitor                            | 0,526 | 0,028 | Arylsulfate sulfotransferase inhibit |
| Antineoplastic (breast cancer)                 | 0,516 | 0,021 | Monodehydroascorbate reductase       |
| 2-Dehydropantoate 2-reductase inhibitor        | 0,514 | 0,021 | (R)-Pantolactone dehydrogenase (     |
| Formaldehyde transketolase inhibitor           | 0,522 | 0,031 | Aspartate-phenylpyruvate transan     |
| Fumarate reductase (NADH) inhibitor            | 0,492 | 0,002 | Mannosyl-oligosaccharide 1,2-alf     |
| Catechol oxidase inhibitor                     | 0,541 | 0,051 | Calcium channel (voltage-sensitive   |
| Hyaluronic acid agonist                        | 0,585 | 0,096 | Membrane permeability inhibitor      |
| Mannose isomerase inhibitor                    | 0,496 | 0,008 | Vomilenine glucosyltransferase inl   |
| Gonadotropin antagonist                        | 0,524 | 0,037 | Leukopoiesis stimulant               |
| Protein synthesis inhibitor                    | 0,548 | 0,062 | Nicotinic alpha2beta2 receptor an    |
| Antiviral (Picornavirus)                       | 0,523 | 0,041 | Fragilysin inhibitor                 |
| Morphine 6-dehydrogenase inhibitor             | 0,499 | 0,017 | Pyruvate decarboxylase inhibitor     |
| Membrane permeability enhancer                 | 0,571 | 0,090 | Nootropic                            |
| Bilirubin oxidase inhibitor                    | 0,520 | 0,039 | Lipid metabolism regulator           |
| Prostaglandin-E2 9-reductase inhibitor         | 0,494 | 0,015 | Anthranilate-CoA ligase inhibitor    |
| Leukotriene-B4 20-monooxygenase inhibitor      | 0,526 | 0,048 | Venombin AB inhibitor                |
| Formate-dihydrofolate ligase inhibitor         | 0,542 | 0,065 | Antiseborrheic                       |
| Rubredoxin-NAD+ reductase inhibitor            | 0,516 | 0,040 | Trans-acenaphthene-1,2-diol dehy     |
| Xenobiotic-transporting ATPase inhibitor       | 0,493 | 0,016 | Glycerol-3-phosphate dehydrogen      |
| Antihelmintic                                  | 0,478 | 0,004 | N-acetylneuraminatase lyase inhibi   |
| GST P1-1 substrate                             | 0,490 | 0,019 | Phosphatidylcholine-sterol O-acylt   |
| Aspulvinone dimethylallyltransferase inhibitor | 0,492 | 0,023 | Peptide alpha-N-acetyltransferase    |
| UGT1A7 substrate                               | 0,509 | 0,041 | Aminobutyraldehyde dehydrogenas      |
| Protein kinase stimulant                       | 0,516 | 0,049 | Glutathione thiolesterase inhibitor  |
| Dehydro-L-gulonate decarboxylase inhibitor     | 0,471 | 0,005 | Cholesterol synthesis inhibitor      |
| CYP4A substrate                                | 0,485 | 0,019 | Membrane permeability enhancer       |
| Antinociceptive                                | 0,469 | 0,003 | Riboflavin phosphotransferase inh    |
| Antineoplastic (lung cancer)                   | 0,502 | 0,038 | Gluconate 5-dehydrogenase inhi       |
| Alcohol O-acetyltransferase inhibitor          | 0,482 | 0,018 | CDP-diacylglycerol-serine O-phosp    |
| Keratolytic                                    | 0,487 | 0,025 | Phosphoinositide 5-phosphatase ii    |
| Levanase inhibitor                             | 0,484 | 0,026 | Pancreatic elastase inhibitor        |



|                                                                         |       |       |                                                        |
|-------------------------------------------------------------------------|-------|-------|--------------------------------------------------------|
| Antipruritic, non-allergic                                              | 0,532 | 0,075 | TP53 expression enhancer                               |
| CYP2A substrate                                                         | 0,494 | 0,037 | 3-Hydroxybenzoate 6-monooxygenase inhibitor            |
| Chemoprotective                                                         | 0,489 | 0,033 | CYP2F1 substrate                                       |
| Chitosanase inhibitor                                                   | 0,467 | 0,010 | Polygalacturonase inhibitor                            |
| Platelet aggregation stimulant                                          | 0,461 | 0,006 | Maltose-transporting ATPase inhibitor                  |
| EIF4E expression inhibitor                                              | 0,484 | 0,030 | Apyrase inhibitor                                      |
| UGT2B7 substrate                                                        | 0,475 | 0,021 | 4-Coumarate-CoA ligase inhibitor                       |
| Menopausal disorders treatment                                          | 0,490 | 0,036 | Alcohol O-acetyltransferase inhibitor                  |
| DNA synthesis inhibitor                                                 | 0,471 | 0,018 | DELTA14-sterol reductase inhibitor                     |
| Neurotrophic factor                                                     | 0,457 | 0,004 | Isoamylase inhibitor                                   |
| Glucose oxidase inhibitor                                               | 0,475 | 0,022 | Cytochrome-b5 reductase inhibitor                      |
| Retinoprotector                                                         | 0,530 | 0,078 | Kidney function stimulant                              |
| Glycerol-1-phosphatase inhibitor                                        | 0,475 | 0,023 | Long-chain-aldehyde dehydrogenase inhibitor            |
| Skin whitener                                                           | 0,467 | 0,016 | D-alanine 2-hydroxymethyltransferase inhibitor         |
| 1,4-Lactonase inhibitor                                                 | 0,483 | 0,033 | TNF expression inhibitor                               |
| Dolichyl-diphosphooligosaccharide-protein glycosyltransferase inhibitor | 0,465 | 0,016 | Protein-tyrosine sulfotransferase inhibitor            |
| Antirickettsial                                                         | 0,526 | 0,077 | Pseudolysin inhibitor                                  |
| Interleukin 2 agonist                                                   | 0,480 | 0,031 | Glyoxylate reductase inhibitor                         |
| Malate dehydrogenase inhibitor                                          | 0,456 | 0,009 | Glycogen (starch) synthase inhibitor                   |
| NOS2 expression inhibitor                                               | 0,448 | 0,004 | Protein-glucosylgalactosylhydroxylase inhibitor        |
| Glucan 1,6-alpha-glucosidase inhibitor                                  | 0,473 | 0,029 | Cytostatic                                             |
| Phosphomevalonate kinase inhibitor                                      | 0,462 | 0,018 | 4-Hydroxymandelate oxidase inhibitor                   |
| Microtubule formation inhibitor                                         | 0,505 | 0,062 | Cytoprotectant                                         |
| Gluconate 2-dehydrogenase (acceptor) inhibitor                          | 0,455 | 0,012 | Methane monooxygenase inhibitor                        |
| CYP19A1 expression inhibitor                                            | 0,466 | 0,023 | Antihelminthic (Nematodes)                             |
| Prunasin beta-glucosidase inhibitor                                     | 0,474 | 0,031 | tRNA-pseudouridine synthase I inhibitor                |
| CYP3A2 substrate                                                        | 0,464 | 0,023 | Glycerol-3-phosphate oxidase inhibitor                 |
| Antibiotic                                                              | 0,450 | 0,009 | Protein synthesis inhibitor                            |
| UGT1A6 substrate                                                        | 0,446 | 0,006 | 4-Alpha-glucanotransferase inhibitor                   |
| Glutamyl endopeptidase II inhibitor                                     | 0,447 | 0,007 | Anticataract                                           |
| N-hydroxyarylamine O-acetyltransferase inhibitor                        | 0,467 | 0,027 | 2-Hydroxymuconate-semialdehyde dehydrogenase inhibitor |
| CYP2C6 substrate                                                        | 0,484 | 0,045 | Muramoyltetrapeptide carboxypeptidase inhibitor        |
| Angiogenesis stimulant                                                  | 0,470 | 0,031 | Steroid N-acetylglucosaminyltransferase inhibitor      |
| Peptidyltransferase inhibitor                                           | 0,450 | 0,012 | N-acetyllactosamine synthase inhibitor                 |
| 1-Acylglycerol-3-phosphate O-acyltransferase inhibitor                  | 0,463 | 0,026 | 3-Phytase inhibitor                                    |
| Thymidylate 5'-phosphatase inhibitor                                    | 0,451 | 0,014 | Alpha-1,6-mannosyl-glycoprotein 4-epimerase inhibitor  |
| UGT2B12 substrate                                                       | 0,539 | 0,104 | Fibrinolytic                                           |
| Glyoxylate oxidase inhibitor                                            | 0,439 | 0,005 | Cystic fibrosis treatment                              |
| Ceramide glucosyltransferase inhibitor                                  | 0,462 | 0,029 | Antimetastatic                                         |
| Linoleate diol synthase inhibitor                                       | 0,440 | 0,009 | Prunasin beta-glucosidase inhibitor                    |
| Dextranase inhibitor                                                    | 0,451 | 0,020 | Di-trans,poly-cis-decaprenylcistransferase inhibitor   |
| Maillard reaction inhibitor                                             | 0,438 | 0,008 | Ganglioside galactosyltransferase inhibitor            |
| Levansucrase inhibitor                                                  | 0,459 | 0,029 | GABA aminotransferase inhibitor                        |
| CYP3A substrate                                                         | 0,450 | 0,021 | Phosphatidylglycerophosphatase inhibitor               |
| Antithrombotic                                                          | 0,437 | 0,008 | Thyroxine 5-deiodinase inhibitor                       |
| NADPH-ferrihemoprotein reductase inhibitor                              | 0,459 | 0,030 | Antiviral (Influenza)                                  |
| Cyclomaltodextrinase inhibitor                                          | 0,436 | 0,009 | Aryl sulfotransferase inhibitor                        |

|                                                |       |       |                                     |
|------------------------------------------------|-------|-------|-------------------------------------|
| Antiviral                                      | 0,431 | 0,004 | Beta-glucosidase inhibitor          |
| Aspergillus nuclease S1 inhibitor              | 0,435 | 0,008 | 2-Dehydropantoate aldolase inhib    |
| Succinate-semialdehyde dehydrogenase [NAD(F    | 0,444 | 0,018 | Phenylacetate-CoA ligase inhibitor  |
| CYP2E1 inducer                                 | 0,566 | 0,140 | Phobic disorders treatment          |
| Mycothioli-S-conjugate amidase inhibitor       | 0,443 | 0,017 | Non-steroidal antiinflammatory ag   |
| Histidine kinase inhibitor                     | 0,445 | 0,019 | Transketolase inhibitor             |
| Phosphatidylglycerophosphatase inhibitor       | 0,440 | 0,015 | Lactaldehyde reductase inhibitor    |
| Glycerol-3-phosphate dehydrogenase inhibitor   | 0,434 | 0,009 | Ferredoxin-NADP+ reductase inhib    |
| UGT1A9 substrate                               | 0,451 | 0,027 | Aspergillus nuclease S1 inhibitor   |
| Aminobutyraldehyde dehydrogenase inhibitor     | 0,441 | 0,017 | Mannitol-1-phosphatase inhibitor    |
| Antileukemic                                   | 0,428 | 0,005 | Neurotrophic factor enhancer        |
| Peptidoglycan glycosyltransferase inhibitor    | 0,440 | 0,017 | 2,3-Dihydroxyindole 2,3-dioxygen    |
| Adenomatous polyposis treatment                | 0,471 | 0,048 | Beta glucuronidase inhibitor        |
| Erythropoiesis stimulant                       | 0,451 | 0,029 | Antihypercholesterolemic            |
| Respiratory analeptic                          | 0,428 | 0,008 | N-(5-amino-5-carboxypentanoyl)-l    |
| Sphinganine kinase inhibitor                   | 0,431 | 0,011 | Sweetener                           |
| Pullulanase inhibitor                          | 0,436 | 0,016 | Glycine dehydrogenase (decarboxy    |
| Histamine release stimulant                    | 0,464 | 0,045 | Formaldehyde transketolase inhib    |
| Mannan endo-1,4-beta-mannosidase inhibitor     | 0,436 | 0,017 | Levansucrase inhibitor              |
| CYP3A4 inducer                                 | 0,491 | 0,073 | Platelet adhesion inhibitor         |
| CYP3A inducer                                  | 0,426 | 0,008 | Paraoxonase substrate               |
| P-benzoquinone reductase (NADPH) inhibitor     | 0,504 | 0,088 | Fusarinine-C ornithinesterase inhib |
| Leukotriene-C4 synthase inhibitor              | 0,470 | 0,055 | Lipoprotein lipase inhibitor        |
| Cis-1,2-dihydro-1,2-dihydroxynaphthalene dehy  | 0,435 | 0,022 | Chloride channel blocker            |
| Opioid kappa 3 receptor antagonist             | 0,472 | 0,060 | Phosphatidylcholine-retinol O-acyl  |
| CYP3A4 substrate                               | 0,415 | 0,003 | Glucan 1,3-beta-glucosidase inhibi  |
| Acetylgalactosaminyl-O-glycosyl-glycoprotein b | 0,420 | 0,010 | 1,4-Alpha-glucan branching enzym    |
| Chemosensitizer                                | 0,481 | 0,071 | General pump inhibitor              |
| CYP2C9 inducer                                 | 0,428 | 0,017 | Aryldialkylphosphatase inhibitor    |
| Chitinase inhibitor                            | 0,455 | 0,046 | Phenol O-methyltransferase inhibi   |
| Lysine 2,3-aminomutase inhibitor               | 0,414 | 0,005 | Xylose isomerase inhibitor          |
| Proteasome ATPase inhibitor                    | 0,443 | 0,035 | Rubredoxin-NAD+ reductase inhibi    |
| Macrophage colony stimulating factor agonist   | 0,419 | 0,014 | D-threo-aldose 1-dehydrogenase i    |
| Apyrase inhibitor                              | 0,455 | 0,051 | CYP3A5 substrate                    |
| General pump inhibitor                         | 0,418 | 0,014 | Indoleacetaldoxime dehydratase ii   |
| 5-O-(4-coumaroyl)-D-quinat 3'-monooxygenas     | 0,420 | 0,017 | Ferredoxin hydrogenase inhibitor    |
| Antineoplastic (solid tumors)                  | 0,435 | 0,034 | Antimyopathies                      |
| Phosphoinositide 5-phosphatase inhibitor       | 0,433 | 0,031 | Malate oxidase inhibitor            |
| Manganese peroxidase inhibitor                 | 0,430 | 0,029 | N-acylmannosamine kinase inhibit    |
| Acylcarnitine hydrolase inhibitor              | 0,406 | 0,005 | Osteoarthritis treatment            |
| 2-Hydroxyquinoline 8-monooxygenase inhibitor   | 0,421 | 0,021 | 2,3,4,5-Tetrahydropyridine-2,6-dic  |
| Electron-transferring-flavoprotein dehydrogena | 0,464 | 0,065 | Benzoate-CoA ligase inhibitor       |
| Lysase inhibitor                               | 0,433 | 0,034 | Cis-1,2-dihydro-1,2-dihydroxynap    |
| Aspartate-phenylpyruvate transaminase inhibiti | 0,422 | 0,023 | Immunomodulator                     |
| MAP kinase stimulant                           | 0,452 | 0,055 | Cyclic AMP agonist                  |
| N-acetylneuraminat 7-O(or 9-O)-acetyltransfer  | 0,411 | 0,015 | Glucose 1-dehydrogenase inhibito    |
| Membrane integrity antagonist                  | 0,426 | 0,030 | Mediator release inhibitor          |

|                                                   |       |       |                                      |
|---------------------------------------------------|-------|-------|--------------------------------------|
| Vasodilator, peripheral                           | 0,425 | 0,030 | Chitosanase inhibitor                |
| Fusarinine-C ornithinesterase inhibitor           | 0,427 | 0,032 | UDP-glucuronosyltransferase subs     |
| RNA-directed RNA polymerase inhibitor             | 0,442 | 0,048 | APOA1 expression enhancer            |
| CYP2C8 inhibitor                                  | 0,419 | 0,024 | Xylan endo-1,3-beta-xylosidase inf   |
| Nucleotide metabolism regulator                   | 0,416 | 0,023 | 4-Nitrophenylphosphatase inhibito    |
| Protein-disulfide reductase (glutathione) inhibit | 0,394 | 0,002 | Aldose 1-epimerase inhibitor         |
| CYP3A1 substrate                                  | 0,460 | 0,070 | Antiviral (Picornavirus)             |
| Alopecia treatment                                | 0,474 | 0,083 | Oxidoreductase inhibitor             |
| CYP2C12 substrate                                 | 0,405 | 0,015 | [acyl-carrier-protein] S-acetyltrans |
| Kidney function stimulant                         | 0,418 | 0,028 | Antiviral (Herpes)                   |
| Pseudolysin inhibitor                             | 0,410 | 0,021 | CYP2B11 substrate                    |
| 5 Hydroxytryptamine uptake stimulant              | 0,432 | 0,044 | Na+-transporting two-sector ATPa     |
|                                                   | 0,402 | 0,015 | Alpha-amylase inhibitor              |
|                                                   | 0,432 | 0,045 | Hydroxylamine oxidase inhibitor      |
|                                                   | 0,442 | 0,056 | Alkane 1-monooxygenase inhibito      |
|                                                   | 0,419 | 0,035 | NADPH-ferrihemoprotein reducta       |
|                                                   | 0,450 | 0,066 | 5 Hydroxytryptamine uptake stimu     |
|                                                   | 0,417 | 0,034 | Sulfite dehydrogenase inhibitor      |
|                                                   | 0,398 | 0,018 | Ethanolaminephosphotransferase       |
|                                                   | 0,384 | 0,004 | Deoxyribonuclease I inhibitor        |
|                                                   | 0,397 | 0,017 | Dihydroxy-acid dehydratase inhibi    |
|                                                   | 0,382 | 0,003 | Isomaltulose synthase inhibitor      |
|                                                   | 0,395 | 0,016 | Inorganic diphosphatase inhibitor    |
|                                                   | 0,467 | 0,088 | Phthalate 4,5-dioxygenase inhibito   |
|                                                   | 0,413 | 0,034 | P-benzoquinone reductase (NADP)      |
|                                                   | 0,418 | 0,040 | CYP2E1 inducer                       |
|                                                   | 0,420 | 0,043 | Mycothioli-S-conjugate amidase inl   |
|                                                   | 0,387 | 0,011 | Laminaribiose phosphorylase inhi     |
|                                                   | 0,397 | 0,022 | 4-Hydroxybenzoate nonaprenyltra      |
|                                                   | 0,459 | 0,084 | Electron-transferring-flavoprotein   |
|                                                   | 0,388 | 0,013 | Glucosamine-6-phosphate deamin       |
|                                                   | 0,433 | 0,058 | CYP2D16 substrate                    |
|                                                   | 0,406 | 0,031 | Formate-dihydrofolate ligase inhi    |
|                                                   | 0,384 | 0,009 | Endo-1,4-beta-xylanase inhibitor     |
|                                                   | 0,404 | 0,031 | Glyoxylate oxidase inhibitor         |
|                                                   | 0,420 | 0,047 | Acetylerase inhibitor                |
|                                                   | 0,379 | 0,007 | ATPase stimulant                     |
|                                                   | 0,416 | 0,043 | 1-Alkylglycerophosphocholine O-a     |
|                                                   | 0,430 | 0,058 | Immunosuppressant                    |
|                                                   | 0,408 | 0,036 | Myc inhibitor                        |
|                                                   | 0,390 | 0,018 | Dynein ATPase inhibitor              |
|                                                   | 0,420 | 0,050 | Cyclic AMP phosphodiesterase inh     |
|                                                   | 0,398 | 0,027 | HCV IRES inhibitor                   |
|                                                   | 0,402 | 0,032 | Phosphatidylinositol diacylglycerol  |
|                                                   | 0,403 | 0,036 | Leukotriene-C4 synthase inhibitor    |
|                                                   | 0,422 | 0,055 | CYP2D15 substrate                    |
|                                                   | 0,400 | 0,033 | Poly(beta-D-mannuronate) lyase ir    |

|           |       |       |                                                                       |
|-----------|-------|-------|-----------------------------------------------------------------------|
|           | 0,415 | 0,048 | Plastoquinol-plastocyanin reductase inhibitor                         |
|           | 0,402 | 0,035 | Nitrite reductase [NAD(P)H] inhibitor                                 |
|           | 0,371 | 0,005 | Lipoxygenase inhibitor                                                |
|           | 0,429 | 0,063 | 4-Nitrophenol 2-monooxygenase inhibitor                               |
|           | 0,429 | 0,065 | Trimethylamine-oxide aldolase inhibitor                               |
|           | 0,442 | 0,078 | Chloride peroxidase inhibitor                                         |
|           | 0,393 | 0,031 | Coccolysin inhibitor                                                  |
|           | 0,441 | 0,079 | Limulus clotting factor B inhibitor                                   |
|           | 0,373 | 0,012 | Peptidyltransferase inhibitor                                         |
|           | 0,409 | 0,048 | Simian immunodeficiency virus protease inhibitor                      |
|           | 0,391 | 0,030 | UGT2B4 substrate                                                      |
|           | 0,378 | 0,017 | N-acetyllactosaminide beta-1,3-N-acetylglucosaminidase inhibitor      |
|           | 0,371 | 0,011 | Cerebroside-sulfatase inhibitor                                       |
|           | 0,429 | 0,070 | Antipruritic, allergic                                                |
|           | 0,382 | 0,024 | Chemopreventive                                                       |
|           | 0,362 | 0,004 | Oligo-1,6-glucosidase inhibitor                                       |
|           | 0,362 | 0,004 | Propanediol dehydratase inhibitor                                     |
|           | 0,371 | 0,014 | Galactokinase inhibitor                                               |
|           | 0,369 | 0,012 | Cellulose 1,4-beta-cellobiosidase inhibitor                           |
|           | 0,392 | 0,039 | Adenylyl-sulfate reductase inhibitor                                  |
|           | 0,365 | 0,013 | Allantoate deiminase inhibitor                                        |
|           | 0,362 | 0,011 | Glucosyl transferase inhibitor                                        |
|           | 0,381 | 0,031 | DNA synthesis inhibitor                                               |
|           | 0,378 | 0,027 | Linoleoyl-CoA desaturase inhibitor                                    |
|           | 0,402 | 0,053 | CYP2C19 substrate                                                     |
|           | 0,356 | 0,007 | Trehalose-phosphatase inhibitor                                       |
|           | 0,366 | 0,017 | UGT2B28 substrate                                                     |
|           | 0,384 | 0,035 | 3-Cyanoalanine hydratase inhibitor                                    |
|           | 0,428 | 0,080 | 2-Hydroxyquinoline 8-monooxygenase inhibitor                          |
|           | 0,389 | 0,041 | H <sup>+</sup> -transporting two-sector ATPase inhibitor              |
|           | 0,370 | 0,023 | Lipotropic                                                            |
|           | 0,386 | 0,042 | Nucleoside oxidase (H <sub>2</sub> O <sub>2</sub> -forming) inhibitor |
|           | 0,353 | 0,010 | Hydroxysteroid dehydrogenase inhibitor                                |
| inhibitor | 0,406 | 0,063 | Cholesterol antagonist                                                |
|           | 0,379 | 0,036 | CYP2A5 substrate                                                      |
|           | 0,377 | 0,036 | Antibacterial                                                         |
|           | 0,416 | 0,074 | Antianginal                                                           |
|           | 0,367 | 0,026 | Glycerol 2-dehydrogenase (NADP <sup>+</sup> ) inhibitor               |
|           | 0,444 | 0,103 | Omptin inhibitor                                                      |
|           | 0,343 | 0,002 | Beta-N-acetylhexosaminidase inhibitor                                 |
|           | 0,354 | 0,013 | Choline-sulfatase inhibitor                                           |
|           | 0,381 | 0,040 | DNA-(apurinic or apyrimidinic site) endonuclease inhibitor            |
|           | 0,357 | 0,017 | Metabolic disease treatment                                           |
|           | 0,415 | 0,075 | Histamine release stimulant                                           |
|           | 0,367 | 0,027 | Gamma-glutamyltransferase inhibitor                                   |
|           | 0,373 | 0,034 | ATP phosphoribosyltransferase inhibitor                               |
|           | 0,373 | 0,034 | Undecaprenyl-phosphate mannosyltransferase inhibitor                  |

|       |       |                                     |
|-------|-------|-------------------------------------|
| 0,347 | 0,008 | Antispirochetal                     |
| 0,372 | 0,033 | Phosphatidate phosphatase inhibi    |
| 0,383 | 0,044 | D-lactaldehyde dehydrogenase inh    |
| 0,361 | 0,024 | Hyaluronic acid agonist             |
| 0,410 | 0,073 | Radiosensitizer                     |
| 0,428 | 0,091 | NADPH peroxidase inhibitor          |
| 0,366 | 0,029 | Procollagen N-endopeptidase inhi    |
| 0,397 | 0,060 | Centromere associated protein inh   |
| 0,347 | 0,011 | Cellulase inhibitor                 |
| 0,369 | 0,033 | Succinate-semialdehyde dehydrog     |
| 0,361 | 0,025 | DNA ligase (ATP) inhibitor          |
| 0,356 | 0,020 | Carnosine synthase inhibitor        |
| 0,351 | 0,017 | Myosin-light-chain-phosphatase in   |
| 0,360 | 0,027 | Oryzin inhibitor                    |
| 0,348 | 0,016 | Diacylglycerol cholinephosphotran   |
| 0,385 | 0,053 | Leukotriene-B4 20-monooxygenas      |
| 0,347 | 0,015 | Sterol 3-beta-glucosyltransferase i |
| 0,356 | 0,024 | ICAM1 expression inhibitor          |
| 0,365 | 0,034 | Antiinflammatory, intestinal        |
| 0,334 | 0,004 | Dextranucrase inhibitor             |
| 0,404 | 0,074 | Peptide agonist                     |
| 0,386 | 0,056 | N-hydroxyarylamine O-acetyltrans    |
| 0,411 | 0,082 | JAK2 expression inhibitor           |
| 0,343 | 0,014 | Acetate-CoA ligase inhibitor        |
| 0,361 | 0,032 | Uroporphyrinogen-III synthase inh   |
| 0,388 | 0,060 | CYP2B5 substrate                    |
| 0,344 | 0,017 | Undecaprenyl-diphosphatase inhi     |
| 0,336 | 0,009 | Cyclooxygenase substrate            |
| 0,361 | 0,035 | Ethanolamine-phosphate cytidyl      |
| 0,388 | 0,062 | CYP3A3 substrate                    |
| 0,333 | 0,008 | Glycerol dehydratase inhibitor      |
| 0,382 | 0,057 | EIF4E expression inhibitor          |
| 0,349 | 0,025 | Galactolipase inhibitor             |
| 0,326 | 0,003 | Cellobiose phosphorylase inhibitor  |
| 0,385 | 0,063 | HMOX1 expression enhancer           |
| 0,373 | 0,051 | Creatininase inhibitor              |
| 0,339 | 0,018 | Aureolysin inhibitor                |
| 0,359 | 0,038 | Acidifying agent non gastric        |
| 0,356 | 0,035 | Cancer associated disorders treatr  |
| 0,356 | 0,036 | Histidinol-phosphatase inhibitor    |
| 0,362 | 0,043 | NADH kinase inhibitor               |
| 0,336 | 0,017 | Aspartyl aminopeptidase inhibitor   |
| 0,326 | 0,007 | Alpha-L-rhamnosidase inhibitor      |
| 0,342 | 0,023 | Alkylglycerophosphoethanolamine     |
| 0,348 | 0,030 | Sphinganine-1-phosphate aldolase    |
| 0,342 | 0,024 | Bisphosphoglycerate mutase inhi     |
| 0,339 | 0,021 | Fumarate reductase (NADH) inhi      |

|       |       |                                    |
|-------|-------|------------------------------------|
| 0,385 | 0,067 | Gonadotropin antagonist            |
| 0,331 | 0,013 | Acyl-CoA oxidase inhibitor         |
| 0,342 | 0,025 | 3-Demethylubiquinone-9 3-O-met     |
| 0,334 | 0,017 | Inositol-polyphosphate 5-phospha   |
| 0,349 | 0,032 | RNA synthesis inhibitor            |
| 0,327 | 0,010 | Chitin synthase inhibitor          |
| 0,387 | 0,070 | Anticonvulsant                     |
| 0,383 | 0,066 | L-glutamate oxidase inhibitor      |
| 0,343 | 0,028 | 2,6-Dihydroxypyridine 3-monooxy    |
| 0,401 | 0,086 | CYP3A substrate                    |
| 0,334 | 0,019 | NAD+ synthase (glutamine-hydroly   |
| 0,356 | 0,042 | Venom exonuclease inhibitor        |
| 0,323 | 0,010 | UDP-glucose-hexose-1-phosphate     |
| 0,338 | 0,026 | Glutaminase inhibitor              |
| 0,345 | 0,032 | Oxidizing agent                    |
| 0,414 | 0,103 | Phospholipid-translocating ATPase  |
| 0,333 | 0,022 | Antidote                           |
| 0,362 | 0,052 | IgA-specific serine endopeptidase  |
| 0,384 | 0,073 | Cl--transporting ATPase inhibitor  |
| 0,320 | 0,010 | Melanin inhibitor                  |
| 0,323 | 0,013 | Benzoylformate decarboxylase inh   |
| 0,342 | 0,033 | Prenyl-diphosphatase inhibitor     |
| 0,368 | 0,059 | CYP3A4 inducer                     |
| 0,321 | 0,012 | Acetylenecarboxylate hydratase in  |
| 0,337 | 0,028 | Ubiquitin thiolesterase inhibitor  |
| 0,409 | 0,100 | Alopecia treatment                 |
| 0,379 | 0,070 | Aldehyde oxidase inhibitor         |
| 0,408 | 0,100 | 27-Hydroxycholesterol 7alpha-mo    |
| 0,369 | 0,061 | Dermatologic                       |
| 0,326 | 0,018 | Pectate lyase inhibitor            |
| 0,323 | 0,017 | Glycerol-1-phosphatase inhibitor   |
| 0,329 | 0,022 | 3'-Nucleotidase inhibitor          |
| 0,416 | 0,110 | CYP2C8 inhibitor                   |
| 0,364 | 0,058 | CYP3A inducer                      |
| 0,317 | 0,012 | Acetolactate decarboxylase inhibit |
| 0,324 | 0,019 | Tauropine dehydrogenase inhibito   |
| 0,402 | 0,097 | Preneoplastic conditions treatmer  |
| 0,368 | 0,063 | P-glycoprotein substrate           |
| 0,309 | 0,004 | Beta galactosidase inhibitor       |
| 0,326 | 0,021 | Ceramide glucosyltransferase inhi  |
| 0,329 | 0,024 | Alcohol dehydrogenase [NAD(P)+]    |
| 0,392 | 0,087 | Aspartyltransferase inhibitor      |
| 0,332 | 0,028 | 2,4-Dichlorophenol 6-monooxyger    |
| 0,338 | 0,035 | Skin irritation, inactive          |
| 0,343 | 0,039 | Hyponitrite reductase inhibitor    |
| 0,337 | 0,034 | Myosin ATPase inhibitor            |
| 0,367 | 0,065 | FMO1 substrate                     |

|       |       |                                     |
|-------|-------|-------------------------------------|
| 0,366 | 0,064 | MMP9 expression inhibitor           |
| 0,367 | 0,067 | Antithrombotic                      |
| 0,342 | 0,043 | Arylesterase inhibitor              |
| 0,314 | 0,014 | Alcohol oxidase inhibitor           |
| 0,303 | 0,005 | 5-Lipoxygenase inhibitor            |
| 0,344 | 0,047 | 4-Hydroxyphenylacetate 3-monoo      |
| 0,367 | 0,070 | Menopausal disorders treatment      |
| 0,301 | 0,005 | Antirickettsial                     |
| 0,381 | 0,085 | Dimethylargininase inhibitor        |
| 0,328 | 0,033 | N-Acyl-D-aspartate deacylase inhibi |
| 0,321 | 0,027 | Aldehyde dehydrogenase (NADP+)      |
| 0,316 | 0,021 | Lactate 2-monooxygenase inhibitor   |
| 0,347 | 0,053 | Isopenicillin-N epimerase inhibitor |
| 0,316 | 0,023 | Transcription factor NF kappa A in  |
| 0,393 | 0,100 | Lysase inhibitor                    |
| 0,355 | 0,062 | Cyanoalanine nitrilase inhibitor    |
| 0,300 | 0,008 | HMG CoA synthase inhibitor          |
| 0,329 | 0,036 | Thiopurine S-methyltransferase in   |
| 0,309 | 0,016 | Glycerone-phosphate O-acyltransf    |
| 0,314 | 0,023 | Cyclopropane-fatty-acyl-phospholi   |
| 0,349 | 0,057 | Alcohol dehydrogenase (acceptor)    |
| 0,387 | 0,095 | CYP3A4 substrate                    |
| 0,349 | 0,058 | RELA expression inhibitor           |
| 0,360 | 0,069 | Cyclohexanone monooxygenase ir      |
| 0,352 | 0,062 | Aspergillopepsin I inhibitor        |
| 0,319 | 0,029 | Rhamnulose-1-phosphate aldolase     |
| 0,329 | 0,040 | Threonine aldolase inhibitor        |
| 0,371 | 0,083 | Nucleotide metabolism regulator     |
| 0,307 | 0,019 | N-methyl-2-oxoglutaramate hydro     |
| 0,309 | 0,022 | N6-methyl-lysine oxidase inhibitor  |
| 0,306 | 0,019 | Growth stimulant                    |
| 0,323 | 0,036 | Xenobiotic-transporting ATPase in   |
| 0,344 | 0,057 | Anesthetic general                  |
| 0,316 | 0,030 | Pappalysin-1 inhibitor              |
| 0,310 | 0,024 | Antiprotozoal (Trichomonas)         |
| 0,313 | 0,027 | Arylsulfatase inhibitor             |
| 0,332 | 0,047 | Anticarcinogenic                    |
| 0,296 | 0,012 | Carnitine dehydratase inhibitor     |
| 0,309 | 0,025 | Serratia marcescens nuclease inhi   |
| 0,350 | 0,066 | All-trans-retinyl-palmitate hydro   |
| 0,290 | 0,007 | Alpha,alpha-trehalose phosphoryl    |
| 0,285 | 0,003 | Alpha-L-fucosidase inhibitor        |
| 0,370 | 0,087 | Nicotine dehydrogenase inhibitor    |
| 0,349 | 0,066 | Prostaglandin-A1 DELTA-isomeras     |
| 0,292 | 0,010 | 1,5-Anhydro-D-fructose reductase    |
| 0,295 | 0,013 | Deoxyribonuclease X inhibitor       |
| 0,328 | 0,046 | Antiviral (Poxvirus)                |

|       |       |                                     |
|-------|-------|-------------------------------------|
| 0,383 | 0,101 | Histamine release inhibitor         |
| 0,295 | 0,014 | Endoglycosylceramidase inhibitor    |
| 0,299 | 0,018 | Pyruvate dehydrogenase (lipoamic    |
| 0,393 | 0,114 | Antineoplastic (non-Hodgkin's lym   |
| 0,304 | 0,025 | 3-Carboxyethylcatechol 2,3-dioxyg   |
| 0,314 | 0,035 | Myeloblastin inhibitor              |
| 0,305 | 0,027 | Farnesyltranstransferase inhibitor  |
| 0,299 | 0,021 | Alkylator                           |
| 0,315 | 0,037 | Horrilysin inhibitor                |
| 0,302 | 0,026 | Mannosyl-glycoprotein endo-beta     |
| 0,298 | 0,023 | Phosphatidate cytidyltransferase    |
| 0,317 | 0,042 | Cutinase inhibitor                  |
| 0,312 | 0,037 | Adrenaline release stimulant        |
| 0,344 | 0,069 | CYP1A substrate                     |
| 0,301 | 0,026 | Nucleoside-diphosphatase inhibito   |
| 0,293 | 0,019 | Tropinesterase inhibitor            |
| 0,325 | 0,051 | Glucan 1,4-alpha-maltotetrahydr     |
| 0,336 | 0,063 | Antiviral (Adenovirus)              |
| 0,330 | 0,057 | Opioid kappa 3 receptor antagonis   |
| 0,368 | 0,095 | CYP2A1 substrate                    |
| 0,312 | 0,039 | Chaperonin ATPase inhibitor         |
| 0,370 | 0,098 | Antihypoxic                         |
| 0,308 | 0,036 | Serine-pyruvate transaminase inhi   |
| 0,300 | 0,028 | Glyoxylate reductase (NADP+) inhi   |
| 0,376 | 0,105 | Erythropoiesis stimulant            |
| 0,318 | 0,047 | Gluconolactonase inhibitor          |
| 0,360 | 0,090 | CYP2C substrate                     |
| 0,372 | 0,102 | (R)-6-hydroxynicotine oxidase inhi  |
| 0,285 | 0,015 | Iduronate-2-sulfatase inhibitor     |
| 0,301 | 0,032 | Malate dehydrogenase inhibitor      |
| 0,308 | 0,039 | N-(long-chain-acyl)ethanolamine c   |
| 0,303 | 0,035 | 4-Chlorobenzoyl-CoA dehalogenas     |
| 0,332 | 0,064 | CYP7 inhibitor                      |
| 0,291 | 0,024 | FMN reductase inhibitor             |
| 0,291 | 0,024 | Isopenicillin-N synthase inhibitor  |
| 0,316 | 0,050 | DNA polymerase I inhibitor          |
| 0,271 | 0,005 | L-fuconate dehydratase inhibitor    |
| 0,352 | 0,086 | Caspase 8 stimulant                 |
| 0,284 | 0,018 | Sucrose-phosphate synthase inhib    |
| 0,276 | 0,010 | Phenylalanine 4-hydroxylase inhib   |
| 0,285 | 0,020 | Sulfate adenyltransferase (ADP) i   |
| 0,339 | 0,074 | Mitochondrial processing peptidas   |
| 0,344 | 0,079 | Gamma-guanidinobutyraldehyde c      |
| 0,330 | 0,066 | Phosphatidylserine decarboxylase    |
| 0,292 | 0,028 | Histone acetyltransferase inhibitor |
| 0,267 | 0,003 | Mannosidase inhibitor               |
| 0,281 | 0,017 | Polynucleotide 5'-hydroxy-kinase i  |



|       |       |                                    |
|-------|-------|------------------------------------|
| 0,370 | 0,106 | Pin1 inhibitor                     |
| 0,270 | 0,007 | Alternansucrase inhibitor          |
| 0,273 | 0,011 | Fructose-2,6-bisphosphate 2-phos   |
| 0,338 | 0,075 | Antiinfective                      |
| 0,332 | 0,069 | Antifungal                         |
| 0,288 | 0,026 | Dolichyl-phosphatase inhibitor     |
| 0,341 | 0,079 | Tpr proteinase (Porphyromonas gi   |
| 0,270 | 0,008 | Galactosylgalactosylglucosylceram  |
| 0,297 | 0,035 | Phosphoenolpyruvate mutase inhi    |
| 0,281 | 0,019 | Diphosphomevalonate decarboxyl     |
| 0,282 | 0,020 | Glutamin-(asparagin-)ase inhibitor |
| 0,312 | 0,051 | Bisphosphoglycerate phosphatase    |
| 0,279 | 0,019 | ATPase inhibitor                   |
| 0,275 | 0,016 | Glycerol-3-phosphate O-acyltransf  |
| 0,336 | 0,076 | Intermittent claudication treatme  |
| 0,347 | 0,088 | Polyamine-transporting ATPase inl  |
| 0,300 | 0,041 | Dolichyl-phosphate beta-glucosylt  |
| 0,294 | 0,035 | L-glucuronate reductase inhibitor  |
| 0,271 | 0,012 | Alpha-N-acetylgalactosaminidase i  |
| 0,285 | 0,027 | Coenzyme-B sulfoethylthiotransfe   |
| 0,297 | 0,039 | GABA C receptor agonist            |
| 0,321 | 0,065 | Choline-phosphate cytidyltransfer  |
| 0,278 | 0,022 | Dolichol kinase inhibitor          |
| 0,373 | 0,118 | Thioredoxin inhibitor              |
| 0,277 | 0,022 | Pyruvate dehydrogenase inhibitor   |
| 0,280 | 0,025 | Aspartate-tRNA ligase inhibitor    |
| 0,310 | 0,056 | Glutamate-tRNA ligase inhibitor    |
| 0,278 | 0,024 | Shikimate 5-dehydrogenase inhibi   |
| 0,294 | 0,039 | CYP2A3 substrate                   |
| 0,333 | 0,079 | Methylamine-glutamate N-methyl     |
| 0,278 | 0,024 | Lipoxygenase substrate             |
| 0,278 | 0,024 | N-acetylneuraminate 4-O-acetyltra  |
| 0,328 | 0,074 | CYP2D2 inhibitor                   |
| 0,322 | 0,069 | Glutamine-phenylpyruvate transa    |
| 0,302 | 0,049 | Dipeptidase E inhibitor            |
| 0,304 | 0,051 | Ophthalmic drug                    |
| 0,271 | 0,018 | Acetoin dehydrogenase inhibitor    |
| 0,271 | 0,019 | Glycerol dehydrogenase inhibitor   |
| 0,288 | 0,036 | UGT2B17 substrate                  |
| 0,306 | 0,054 | Antiparasitic                      |
| 0,256 | 0,004 | Phosphatidylglycerol-membrane-c    |
| 0,284 | 0,033 | 2-Enoate reductase inhibitor       |
| 0,346 | 0,096 | Biotinidase inhibitor              |
| 0,255 | 0,005 | 4-Carboxymethyl-4-methylbuteno     |
| 0,274 | 0,024 | Aminocarboxymuconate-semialde      |
| 0,291 | 0,042 | 2-Hydroxy-3-oxoadipate synthase    |
| 0,269 | 0,021 | Alkene monooxygenase inhibitor     |

|                  |       |       |                                     |
|------------------|-------|-------|-------------------------------------|
|                  | 0,257 | 0,008 | Isocitrate dehydrogenase (NAD+) i   |
|                  | 0,264 | 0,016 | 3-Ketovalidoxylamine C-N-lyase in   |
|                  | 0,257 | 0,008 | 2-Dehydropantolactone reductase     |
|                  | 0,262 | 0,014 | Adrenergic, ophthalmic              |
|                  | 0,263 | 0,015 | Pectin lyase inhibitor              |
|                  | 0,306 | 0,058 | Carbon-monoxide dehydrogenase       |
|                  | 0,252 | 0,005 | (R)-aminopropanol dehydrogenase     |
|                  | 0,339 | 0,092 | Respiratory analeptic               |
|                  | 0,269 | 0,022 | Formaldehyde dehydrogenase inh      |
|                  | 0,301 | 0,054 | CYP2A2 substrate                    |
|                  | 0,283 | 0,036 | UGT2B7 substrate                    |
|                  | 0,257 | 0,011 | CDP-diacylglycerol-inositol 3-phos  |
|                  | 0,259 | 0,013 | Protein kinase stimulant            |
|                  | 0,264 | 0,018 | Acyloxyacyl hydrolase inhibitor     |
|                  | 0,335 | 0,090 | Analeptic                           |
|                  | 0,271 | 0,026 | Phosphoenolpyruvate-protein phc     |
|                  | 0,335 | 0,090 | CDK9/cyclin T1 inhibitor            |
|                  | 0,250 | 0,005 | Amylo-alpha-1,6-glucosidase inhib   |
|                  | 0,266 | 0,021 | Laxative                            |
|                  | 0,271 | 0,027 | Peptidylamidoglycolate lyase inhi   |
|                  | 0,269 | 0,025 | CYP4F2 substrate                    |
|                  | 0,265 | 0,020 | Pyruvate carboxylase inhibitor      |
|                  | 0,304 | 0,060 | Uterine relaxant                    |
|                  | 0,260 | 0,016 | Mevalonate kinase inhibitor         |
|                  | 0,346 | 0,103 | CYP2C8 substrate                    |
|                  | 0,282 | 0,039 | Choleretic                          |
|                  | 0,275 | 0,032 | 2-Acylglycerol O-acyltransferase ir |
|                  | 0,291 | 0,049 | Pancreatic ribonuclease inhibitor   |
|                  | 0,327 | 0,085 | Histidine kinase inhibitor          |
|                  | 0,365 | 0,124 | Fructose 5-dehydrogenase inhibito   |
|                  | 0,263 | 0,023 | UGT2B9 substrate                    |
|                  | 0,318 | 0,078 | Chenodeoxycholoyltaurine hydroli    |
|                  | 0,247 | 0,007 | Mannonate dehydratase inhibitor     |
|                  | 0,264 | 0,025 | Anthranilate 3-monooxygenase (d     |
|                  | 0,268 | 0,029 | Expectorant                         |
|                  | 0,250 | 0,011 | Triose-phosphate isomerase inhibi   |
| ferase inhibitor | 0,262 | 0,024 | Ligase inhibitor                    |
|                  | 0,283 | 0,044 | Antihelmintic                       |
|                  | 0,265 | 0,028 | Antimycoplasmal                     |
|                  | 0,258 | 0,021 | UGT2B10 substrate                   |
|                  | 0,269 | 0,033 | Phenol 2-monooxygenase inhibito     |
|                  | 0,292 | 0,056 | Cholestanetriol 26-monooxygenas     |
|                  | 0,293 | 0,058 | Endopeptidase La inhibitor          |
|                  | 0,247 | 0,013 | Xylan 1,4-beta-xylosidase inhibitor |
|                  | 0,254 | 0,019 | Asparagine-tRNA ligase inhibitor    |
|                  | 0,355 | 0,121 | Glutamate-5-semialdehyde dehyd      |
|                  | 0,263 | 0,029 | Hydroxymethylbilane synthase inh    |

|       |       |                                    |
|-------|-------|------------------------------------|
| 0,237 | 0,004 | Arabinogalactan endo-1,4-beta-ga   |
| 0,257 | 0,024 | Mucolytic                          |
| 0,258 | 0,025 | Phenylpyruvate decarboxylase inh   |
| 0,248 | 0,015 | O-acetylhomoserine aminocarbox'    |
| 0,270 | 0,038 | O-aminophenol oxidase inhibitor    |
| 0,237 | 0,005 | Mycodextranase inhibitor           |
| 0,247 | 0,014 | Phosphofructokinase-1 inhibitor    |
| 0,239 | 0,007 | Ketohexokinase inhibitor           |
| 0,283 | 0,051 | GST M substrate                    |
| 0,274 | 0,042 | Poly(alpha-L-gulonate) lyase inh   |
| 0,286 | 0,055 | Beta-carotene 15,15'-monooxyger    |
| 0,319 | 0,089 | Bilirubin oxidase inhibitor        |
| 0,260 | 0,030 | Choline kinase inhibitor           |
| 0,289 | 0,061 | S-alkylcysteine lyase inhibitor    |
| 0,259 | 0,030 | Alpha-glucuronidase inhibitor      |
| 0,287 | 0,059 | Taurocyamine kinase inhibitor      |
| 0,287 | 0,059 | Opheline kinase inhibitor          |
| 0,266 | 0,039 | Tetrahydroxynaphthalene reducta    |
| 0,294 | 0,067 | Antiprotozoal (Coccidial)          |
| 0,260 | 0,033 | Penicillin amidase inhibitor       |
| 0,287 | 0,060 | Rheumatoid arthritis treatment     |
| 0,240 | 0,014 | Choline dehydrogenase inhibitor    |
| 0,261 | 0,035 | Retinol dehydrogenase inhibitor    |
| 0,231 | 0,005 | Tagaturonate reductase inhibitor   |
| 0,231 | 0,005 | Fructuronate reductase inhibitor   |
| 0,242 | 0,017 | Lysozyme inhibitor                 |
| 0,263 | 0,038 | Nitrate reductase inhibitor        |
| 0,286 | 0,061 | Endothelial growth factor antagon  |
| 0,324 | 0,099 | CYP2C9 inducer                     |
| 0,247 | 0,023 | Testosterone 17beta-dehydrogenat   |
| 0,289 | 0,065 | Glycolate dehydrogenase inhibitor  |
| 0,300 | 0,076 | Prostaglandin-E2 9-reductase inhi  |
| 0,282 | 0,059 | Corticosteroid side-chain-isomeras |
| 0,240 | 0,017 | Phosphoglycerate mutase inhibito   |
| 0,245 | 0,023 | Phosphoinositide phospholipase C   |
| 0,338 | 0,116 | Fibrolase inhibitor                |
| 0,279 | 0,057 | Prolyl aminopeptidase inhibitor    |
| 0,352 | 0,131 | Neurotransmitter antagonist        |
| 0,240 | 0,020 | Deoxyribose-phosphate aldolase i   |
| 0,241 | 0,021 | Antibiotic                         |
| 0,256 | 0,036 | Alpha-Methylacyl-CoA racemase ir   |
| 0,286 | 0,067 | Eye irritation, inactive           |
| 0,261 | 0,041 | 3-Methylbutanal reductase inhibit  |
| 0,264 | 0,045 | Rhodotorulapepsin inhibitor        |
| 0,244 | 0,026 | Thiamine-phosphate kinase inhibit  |
| 0,236 | 0,017 | Alpha,alpha-trehalase inhibitor    |
| 0,252 | 0,034 | Acetate kinase inhibitor           |

ferase inhibitor

|       |       |                                     |
|-------|-------|-------------------------------------|
| 0,228 | 0,010 | Phosphoribulokinase inhibitor       |
| 0,235 | 0,018 | Gaucher disease treatment           |
| 0,239 | 0,022 | Phosphate acetyltransferase inhibi  |
| 0,268 | 0,051 | Glutarate-semialdehyde dehydrog     |
| 0,278 | 0,062 | Clavaminat synthase inhibitor       |
| 0,241 | 0,025 | Retinyl-palmitate esterase inhibito |
| 0,283 | 0,067 | Thiol oxidase inhibitor             |
| 0,245 | 0,030 | Acylglycerone-phosphate reductas    |
| 0,231 | 0,015 | Glyceraldehyde-3-phosphate dehy     |
| 0,242 | 0,027 | Diisopropyl-fluorophosphatase inf   |
| 0,239 | 0,025 | ATP adenyltransferase inhibitor     |
| 0,299 | 0,086 | Radioprotector                      |
| 0,241 | 0,028 | Phloroglucinol reductase inhibitor  |
| 0,273 | 0,060 | NOS2 expression inhibitor           |
| 0,247 | 0,034 | Rhizopuspepsin inhibitor            |
| 0,287 | 0,074 | Arylmalonate decarboxylase inhibi   |
| 0,269 | 0,056 | Benzaldehyde dehydrogenase (NA      |
| 0,234 | 0,021 | Homoserine dehydrogenase inhibi     |
| 0,270 | 0,058 | Carboxypeptidase D inhibitor        |
| 0,248 | 0,036 | Leucine dehydrogenase inhibitor     |
| 0,246 | 0,035 | 2-Haloacid dehalogenase (configu    |
| 0,251 | 0,040 | Snopalysin inhibitor                |
| 0,229 | 0,018 | Geranylgeranyl-diphosphate gerar    |
| 0,322 | 0,111 | CYP4A11 substrate                   |
| 0,253 | 0,043 | Arylamine N-acetyltransferase inh   |
| 0,252 | 0,042 | Glutathione peroxidase inhibitor    |
| 0,213 | 0,003 | Alpha,alpha-phosphotrehalase inh    |
| 0,233 | 0,023 | Serine-phosphoethanolamine synt     |
| 0,229 | 0,020 | Diiodophenylpyruvate reductase i    |
| 0,285 | 0,077 | AR expression inhibitor             |
| 0,224 | 0,016 | Glycerophosphocholine cholineph     |
| 0,227 | 0,019 | Heparan-alpha-glucosaminide N-a     |
| 0,265 | 0,057 | Dimethylmaleate hydratase inhibi    |
| 0,213 | 0,005 | Inositol-3-phosphate synthase inhi  |
| 0,219 | 0,012 | UDP-N-acetylglucosamine-dolichyl    |
| 0,274 | 0,068 | Photosensitizer                     |
| 0,278 | 0,072 | N-methylhydantoinase (ATP-hydr      |
| 0,231 | 0,025 | UGT2B18 substrate                   |
| 0,256 | 0,051 | Phospholipase A1 inhibitor          |
| 0,214 | 0,009 | Phenylalanine-tRNA ligase inhibito  |
| 0,254 | 0,050 | Anesthetic                          |
| 0,210 | 0,007 | High-mannose-oligosaccharide bet    |
| 0,285 | 0,082 | Para amino benzoic acid antagonis   |
| 0,236 | 0,033 | GDP-mannose 6-dehydrogenase ir      |
| 0,282 | 0,079 | N-benzyloxycarbonylglycine hydro    |
| 0,347 | 0,145 | Antidyskinetic                      |
| 0,242 | 0,039 | 2-Oxoglutarate decarboxylase inhi   |

|       |       |                                     |
|-------|-------|-------------------------------------|
| 0,259 | 0,056 | N-hydroxy-2-acetamidofluorene re    |
| 0,249 | 0,047 | Acylaminoacyl-peptidase inhibitor   |
| 0,229 | 0,028 | 8-Amino-7-oxononanoate synthas      |
| 0,258 | 0,057 | Antileukemic                        |
| 0,242 | 0,041 | Peptidyl-dipeptidase B inhibitor    |
| 0,290 | 0,089 | CYP3A7 substrate                    |
| 0,222 | 0,020 | Glycerol-3-phosphate dehydrogen     |
| 0,220 | 0,019 | UDP-glucose 4-epimerase inhibito    |
| 0,280 | 0,079 | Macrophage stimulant                |
| 0,351 | 0,150 | Thromboxane B2 antagonist           |
| 0,270 | 0,070 | Tryptophan 2,3-dioxygenase inhibi   |
| 0,295 | 0,094 | CYP2A6 substrate                    |
| 0,239 | 0,038 | Protein-synthesizing GTPase inhibi  |
| 0,268 | 0,068 | Thiamine pyridinylase inhibitor     |
| 0,302 | 0,103 | Leukopoiesis inhibitor              |
| 0,258 | 0,058 | CYP2A11 substrate                   |
| 0,302 | 0,104 | CYP19A1 expression inhibitor        |
| 0,282 | 0,084 | Pyroglutamyl-peptidase II inhibitor |
| 0,201 | 0,005 | Osmotic diuretic                    |
| 0,341 | 0,144 | Mucositis treatment                 |
| 0,260 | 0,063 | Yeast ribonuclease inhibitor        |
| 0,242 | 0,045 | Alkylglycerone-phosphate synthas    |
| 0,227 | 0,031 | Cysteine synthase inhibitor         |
| 0,226 | 0,031 | ADP-ribosylarginine hydrolase inhi  |
| 0,280 | 0,086 | Antiprotozoal (Amoeba)              |
| 0,212 | 0,018 | Fructose-2,6-bisphosphate 6-phos    |
| 0,202 | 0,008 | Urolithiasis treatment              |
| 0,234 | 0,040 | (S)-3-hydroxyacid ester dehydroge   |
| 0,258 | 0,065 | Meprin B inhibitor                  |
| 0,247 | 0,054 | Crotonoyl-[acyl-carrier-protein] hy |
| 0,237 | 0,045 | Laccase inhibitor                   |
| 0,215 | 0,023 | Lactaldehyde reductase (NADPH) i    |
| 0,221 | 0,028 | Antihyperlipoproteinemic            |
| 0,202 | 0,009 | Neolactotetraosylceramide alpha-    |
| 0,297 | 0,105 | Retinoic acid metabolism inhibitor  |
| 0,277 | 0,085 | Urethanase inhibitor                |
| 0,224 | 0,032 | Antihypotensive                     |
| 0,315 | 0,124 | Dementia treatment                  |
| 0,328 | 0,138 | Sulfur reductase inhibitor          |
| 0,202 | 0,014 | Phosphoenolpyruvate carboxykina     |
| 0,215 | 0,027 | Antibiotic Glycopeptide-like        |
| 0,289 | 0,101 | Hypolipemic                         |
| 0,202 | 0,015 | Sorbose dehydrogenase inhibitor     |
| 0,251 | 0,064 | L-threonine 3-dehydrogenase inhi    |
| 0,258 | 0,071 | CYP2E1 substrate                    |
| 0,255 | 0,069 | Morphine 6-dehydrogenase inhibi     |
| 0,218 | 0,032 | (N-acetylneuraminy)-galactosylglu   |

|       |       |                                     |
|-------|-------|-------------------------------------|
| 0,243 | 0,057 | Hemostatic                          |
| 0,212 | 0,026 | Isovaleryl-CoA dehydrogenase inhi   |
| 0,194 | 0,008 | UDP-N-acetylglucosamine 2-epime     |
| 0,189 | 0,004 | Glucan 1,4-alpha-glucosidase inhi   |
| 0,257 | 0,071 | CYP2E substrate                     |
| 0,252 | 0,067 | Cyclohexyl-isocyanide hydratase ir  |
| 0,257 | 0,073 | Aspartate-ammonia ligase inhibito   |
| 0,207 | 0,023 | D-lactate dehydrogenase inhibitor   |
| 0,201 | 0,017 | Dolichyl-phosphate beta-D-mannoc    |
| 0,219 | 0,035 | 3-Hydroxyphenylacetate 6-hydrox     |
| 0,187 | 0,004 | Alpha-mannosidase inhibitor         |
| 0,219 | 0,035 | Sulfur dioxygenase inhibitor        |
| 0,222 | 0,038 | Ferrochelataze inhibitor            |
| 0,212 | 0,029 | NAD+ kinase inhibitor               |
| 0,210 | 0,027 | Lactosylceramide alpha-2,3-sialylti |
| 0,198 | 0,015 | CYP26A substrate                    |
| 0,224 | 0,041 | UGT1A5 substrate                    |
| 0,211 | 0,029 | Polar-amino-acid-transporting ATF   |
| 0,268 | 0,086 | Tyrosine 3 hydroxylase inhibitor    |
| 0,198 | 0,016 | Glycosylphosphatidylinositol diacy  |
| 0,264 | 0,083 | CYP2B10 substrate                   |
| 0,200 | 0,019 | Adenylylsulphatase inhibitor        |
| 0,231 | 0,050 | 3-Hydroxy-4-oxoquinoline 2,4-dio    |
| 0,217 | 0,037 | Mannan endo-1,6-alpha-mannosic      |
| 0,197 | 0,017 | Galactoside 2-alpha-L-fucosyltrans  |
| 0,192 | 0,012 | Homoserine O-succinyltransferase    |
| 0,192 | 0,012 | Arabinose isomerase inhibitor       |
| 0,236 | 0,057 | Antiseptic                          |
| 0,222 | 0,042 | UGT2B15 substrate                   |
| 0,212 | 0,032 | Glutathione S-transferase substrat  |
| 0,224 | 0,045 | Glycine C-acetyltransferase inhibit |
| 0,243 | 0,064 | D-amino-acid dehydrogenase inhi     |
| 0,259 | 0,080 | CYP1A1 substrate                    |
| 0,287 | 0,108 | 1-Acylglycerol-3-phosphate O-acyl   |
| 0,204 | 0,026 | Glucarate dehydratase inhibitor     |
| 0,199 | 0,021 | Agmatinase inhibitor                |
| 0,196 | 0,019 | Agaridine gamma-glutamyltransfer    |
| 0,245 | 0,068 | Antiperistaltic                     |
| 0,252 | 0,076 | Peroxidase inhibitor                |
| 0,187 | 0,010 | 6-Phosphofructo-2-kinase inhibito   |
| 0,196 | 0,019 | Antineoplastic antibiotic           |
| 0,279 | 0,103 | Peptidyl-dipeptidase Dcp inhibitor  |
| 0,303 | 0,127 | Caspase 3 stimulant                 |
| 0,242 | 0,066 | Pediculicide                        |
| 0,225 | 0,050 | (S)-3-amino-2-methylpropionate ti   |
| 0,206 | 0,031 | Beta-ureidopropionase inhibitor     |
| 0,206 | 0,031 | HIV-2 reverse transcriptase inhibit |

|       |       |                                     |
|-------|-------|-------------------------------------|
| 0,225 | 0,051 | UGT2B substrate                     |
| 0,193 | 0,018 | 2-Oxoaldehyde dehydrogenase (N      |
| 0,209 | 0,034 | Insecticide                         |
| 0,257 | 0,083 | Indanol dehydrogenase inhibitor     |
| 0,244 | 0,070 | Proliferative diseases treatment    |
| 0,189 | 0,015 | Sucrose synthase inhibitor          |
| 0,189 | 0,015 | Uridine nucleosidase inhibitor      |
| 0,272 | 0,098 | Naphthalene 1,2-dioxygenase inhi    |
| 0,272 | 0,098 | Ferredoxin-NAD+ reductase inhibi    |
| 0,267 | 0,094 | N-formylmethionyl-peptidase inhi    |
| 0,250 | 0,077 | Antiviral (CMV)                     |
| 0,211 | 0,038 | D-Octopine dehydrogenase inhibit    |
| 0,193 | 0,020 | Choline sulfotransferase inhibitor  |
| 0,256 | 0,084 | Antiischemic                        |
| 0,180 | 0,008 | 3-Dehydroquininate synthase inhibi  |
| 0,232 | 0,060 | Magnesium-protoporphyrin IX mo      |
| 0,185 | 0,013 | Capillary fragility treatment       |
| 0,196 | 0,024 | NADH dehydrogenase inhibitor        |
| 0,304 | 0,132 | Interleukin 2 agonist               |
| 0,198 | 0,026 | Acetyl-CoA C-acyltransferase inhi   |
| 0,208 | 0,037 | [phosphorylase] phosphatase inhi    |
| 0,213 | 0,043 | Gastritis treatment                 |
| 0,183 | 0,012 | UGT2B11 substrate                   |
| 0,246 | 0,076 | Adenosine regulator                 |
| 0,179 | 0,009 | Secretase stimulant                 |
| 0,179 | 0,009 | Secretase alpha stimulant           |
| 0,211 | 0,042 | Hydroxymethylglutaryl-CoA lyase i   |
| 0,279 | 0,109 | Pro-opiomelanocortin converting c   |
| 0,212 | 0,043 | 3-Chloro-D-alanine dehydrochlorir   |
| 0,287 | 0,118 | UGT2B12 substrate                   |
| 0,196 | 0,028 | Transcription factor NF kappa B inl |
| 0,237 | 0,069 | Nardilysin inhibitor                |
| 0,261 | 0,094 | UGT1A9 substrate                    |
| 0,208 | 0,041 | Aryl-alcohol dehydrogenase (NADI    |
| 0,254 | 0,088 | CYP2C6 substrate                    |
| 0,237 | 0,071 | CYP2G1 substrate                    |
| 0,206 | 0,039 | Quercetin 2,3-dioxygenase inhibito  |
| 0,263 | 0,097 | CYP4A substrate                     |
| 0,268 | 0,102 | Antidiabetic                        |
| 0,190 | 0,024 | 2-Amino adipate transaminase inhi   |
| 0,209 | 0,043 | Restenosis treatment                |
| 0,204 | 0,039 | Phenylalanine decarboxylase inhi    |
| 0,210 | 0,046 | Gamma-butyrobetaine dioxygenas      |
| 0,182 | 0,018 | Xanthommatin reductase inhibitor    |
| 0,200 | 0,036 | DOPA decarboxylase inhibitor        |
| 0,227 | 0,063 | Signal peptidase I inhibitor        |
| 0,206 | 0,042 | CYP2A10 substrate                   |

|       |       |                                     |
|-------|-------|-------------------------------------|
| 0,179 | 0,015 | UDP-N-acetylglucosamine diphosp     |
| 0,169 | 0,005 | Glucan 1,3-alpha-glucosidase inhi   |
| 0,235 | 0,072 | Bothrolysin inhibitor               |
| 0,165 | 0,002 | Plasminogen activator stimulant     |
| 0,176 | 0,014 | Cytokine release inhibitor          |
| 0,181 | 0,019 | Chondroitin 6-sulfotransferase inh  |
| 0,256 | 0,094 | Hematopoietic inhibitor             |
| 0,231 | 0,070 | Antipruritic, non-allergic          |
| 0,165 | 0,004 | Amylosucrase inhibitor              |
| 0,341 | 0,179 | Acetylcholine neuromuscular bloc    |
| 0,169 | 0,008 | Epoxide hydrolase substrate         |
| 0,186 | 0,025 | Sepiapterin reductase inhibitor     |
| 0,215 | 0,054 | Severe acute respiratory syndrom    |
| 0,266 | 0,106 | CYP2A substrate                     |
| 0,229 | 0,069 | Polyribonucleotide nucleotidyltr    |
| 0,171 | 0,012 | Glycerophosphocholine phosphod      |
| 0,173 | 0,014 | Deoxycytidine deaminase inhibitor   |
| 0,195 | 0,035 | 2,2-Dialkylglycine decarboxylase (p |
| 0,188 | 0,029 | VCAM1 expression inhibitor          |
| 0,187 | 0,028 | Pyridoxine 5-dehydrogenase inhi     |
| 0,234 | 0,075 | Acetylserotonin O-methyltransfer    |
| 0,195 | 0,036 | Allantoinase inhibitor              |
| 0,179 | 0,021 | 6-Methylsalicylate decarboxylase i  |
| 0,177 | 0,019 | Phosphoglycolate phosphatase inh    |
| 0,211 | 0,053 | Glutamate 5-kinase inhibitor        |
| 0,207 | 0,049 | tRNA nucleotidyltransferase inhi    |
| 0,204 | 0,046 | Nitric oxide scavenger              |
| 0,176 | 0,019 | CMP-N-acetylneuraminate monoo       |
| 0,238 | 0,081 | Diamine N-acetyltransferase inhi    |
| 0,231 | 0,073 | Gamma-D-Glutamyl-meso-diamino       |
| 0,211 | 0,054 | Ferredoxin-nitrite reductase inhi   |
| 0,203 | 0,045 | Lipoprotein disorders treatment     |
| 0,168 | 0,012 | 4-Hydroxy-4-methyl-2-oxoglutarat    |
| 0,197 | 0,041 | Gentisate 1,2-dioxygenase inhibit   |
| 0,257 | 0,101 | 4-Methoxybenzoate monooxygen        |
| 0,180 | 0,024 | Aspartate kinase inhibitor          |
| 0,205 | 0,049 | Arachidonic acid antagonist         |
| 0,238 | 0,082 | Vascular dementia treatment         |
| 0,165 | 0,009 | Protein kinase C stimulant          |
| 0,190 | 0,034 | Nitric-oxide synthase stimulant     |
| 0,166 | 0,010 | Gentamicin 2''-nucleotidyltransfer  |
| 0,197 | 0,041 | 3-Oxadipate enol-lactonase inhi     |
| 0,204 | 0,049 | Inulinase inhibitor                 |
| 0,172 | 0,017 | Imidazoleacetate 4-monooxygena      |
| 0,167 | 0,012 | Reductase inhibitor                 |
| 0,174 | 0,020 | Beta-amylase inhibitor              |
| 0,175 | 0,021 | Astringent                          |



|       |       |                                     |
|-------|-------|-------------------------------------|
| 0,237 | 0,084 | Cell wall biosynthesis inhibitor    |
| 0,178 | 0,024 | Pyrimidine-deoxynucleoside 2'-dic   |
| 0,165 | 0,012 | Glyceraldehyde-3-phosphate dehy     |
| 0,196 | 0,042 | Transforming growth factor beta 1   |
| 0,207 | 0,053 | Tentoxilysin inhibitor              |
| 0,202 | 0,048 | L-amino-acid oxidase inhibitor      |
| 0,194 | 0,042 | CYP2B18 substrate                   |
| 0,194 | 0,042 | Hippurate hydrolase inhibitor       |
| 0,267 | 0,115 | CYP1A2 substrate                    |
| 0,179 | 0,027 | (S)-carnitine 3-dehydrogenase inhi  |
| 0,181 | 0,029 | NAD(P)+ transhydrogenase (B-spe     |
| 0,188 | 0,037 | Cholesterol oxidase inhibitor       |
| 0,173 | 0,022 | D-malate dehydrogenase (decarb      |
| 0,170 | 0,019 | Glycoprotein 3-alpha-L-fucosyltrar  |
| 0,225 | 0,075 | Flavin-containing monooxygenase     |
| 0,190 | 0,040 | Protein-S-isoprenylcysteine O-met   |
| 0,156 | 0,006 | Peptidoglycan beta-N-acetylmurar    |
| 0,180 | 0,029 | 5-Aminolevulinate synthase inhibi   |
| 0,192 | 0,042 | Adenylate kinase inhibitor          |
| 0,245 | 0,094 | Antitoxic                           |
| 0,188 | 0,038 | GST T1-1 substrate                  |
| 0,188 | 0,038 | GST T substrate                     |
| 0,184 | 0,034 | Sulfate adenyltransferase inhibit   |
| 0,225 | 0,076 | Antifibrinolytic                    |
| 0,157 | 0,008 | 2-Dehydro-3-deoxy-phosphogluco      |
| 0,187 | 0,038 | Malate-CoA ligase inhibitor         |
| 0,177 | 0,028 | 1-Aminocyclopropane-1-carboxyla     |
| 0,197 | 0,049 | Penicillopepsin inhibitor           |
| 0,169 | 0,020 | HIV-1 integrase (Overall Integratio |
| 0,160 | 0,013 | Galactosylceramidase inhibitor      |
| 0,172 | 0,025 | Sepsis treatment                    |
| 0,210 | 0,062 | Polyneuridine-aldehyde esterase i   |
| 0,164 | 0,017 | Carbamoyl-phosphate synthase (a     |
| 0,157 | 0,011 | Fatty-acyl-ethyl-ester synthase inh |
| 0,201 | 0,055 | Guanidinoacetate N-methyltransfe    |
| 0,197 | 0,051 | Tryptophan dimethylallyltransfera   |
| 0,285 | 0,138 | S-formylglutathione hydrolase inhi  |
| 0,181 | 0,035 | Carboxylesterase inhibitor          |
| 0,245 | 0,099 | Skeletal muscle relaxant            |
| 0,238 | 0,092 | Transcription factor inhibitor      |
| 0,222 | 0,077 | Bontoxilysin inhibitor              |
| 0,205 | 0,060 | Ribonucleoside triphosphate redu    |
| 0,189 | 0,044 | Alcohol dehydrogenase (NADP+) ir    |
| 0,194 | 0,049 | Glycerol dehydrogenase (NADP+) i    |
| 0,179 | 0,034 | Adenylate cyclase stimulant         |
| 0,207 | 0,063 | UGT1A1 substrate                    |
| 0,167 | 0,023 | 2-Pyrocatechuate decarboxylase ir   |

|       |       |                                     |
|-------|-------|-------------------------------------|
| 0,195 | 0,051 | Microtubule formation inhibitor     |
| 0,194 | 0,050 | 3,4-Dihydroxy-9,10-secoandrosta-    |
| 0,153 | 0,009 | Aldose reductase inhibitor          |
| 0,246 | 0,102 | Maillard reaction inhibitor         |
| 0,288 | 0,144 | Fibrinogen receptor antagonist      |
| 0,155 | 0,011 | [acetyl-CoA carboxylase] kinase inl |
| 0,184 | 0,040 | Glutamate synthase (ferredoxin) ir  |
| 0,199 | 0,055 | Aldose reductase substrate          |
| 0,169 | 0,025 | Biphenyl-2,3-diol 1,2-dioxygenase   |
| 0,160 | 0,016 | Malate dehydrogenase (NADP+) ir     |
| 0,181 | 0,037 | Acyl-lysine deacylase inhibitor     |
| 0,153 | 0,010 | Alpha glucosidase inhibitor         |
| 0,248 | 0,105 | MAP kinase kinase 4 inhibitor       |
| 0,153 | 0,010 | Imidazoleglycerol-phosphate dehy    |
| 0,213 | 0,070 | Retinal dehydrogenase inhibitor     |
| 0,249 | 0,106 | Methylumbelliferyl-acetate deacei   |
| 0,226 | 0,083 | Glycine amidinotransferase inhibit  |
| 0,325 | 0,183 | Taurine dehydrogenase inhibitor     |
| 0,155 | 0,013 | Beta-N-acetylgalactosaminidase in   |
| 0,160 | 0,018 | Malyl-CoA lyase inhibitor           |
| 0,162 | 0,021 | Glutamate dehydrogenase (NADP-      |
| 0,156 | 0,015 | CDC25A inhibitor                    |
| 0,171 | 0,029 | DNA nucleotidylexotransferase inl   |
| 0,224 | 0,083 | Dactylisin inhibitor                |
| 0,196 | 0,055 | Trans-2-enoyl-CoA reductase (NAC    |
| 0,196 | 0,055 | Pyruvate dehydrogenase (cytochr     |
| 0,279 | 0,138 | Muscular dystrophy treatment        |
| 0,168 | 0,028 | Dihydropyrimidinase inhibitor       |
| 0,202 | 0,061 | Metallo-carboxypeptidase D inhibit  |
| 0,202 | 0,062 | N-acetyl-gamma-glutamyl-phosph      |
| 0,148 | 0,008 | Mannosyl-oligosaccharide glucosic   |
| 0,162 | 0,022 | Bis(5'-adenosyl)-triphosphatase in  |
| 0,149 | 0,009 | Lactaldehyde dehydrogenase inhi     |
| 0,222 | 0,082 | Dopamine release stimulant          |
| 0,155 | 0,015 | Beta-fructofuranosidase inhibitor   |
| 0,284 | 0,145 | Spermidine dehydrogenase inhibit    |
| 0,196 | 0,057 | Antineoplastic (lymphoma)           |
| 0,153 | 0,014 | Glycerol kinase inhibitor           |
| 0,164 | 0,026 | Valine dehydrogenase (NADP+) inl    |
| 0,165 | 0,027 | CYP3A5 inducer                      |
| 0,202 | 0,065 | Biotin-CoA ligase inhibitor         |
| 0,202 | 0,065 | 6-Carboxyhexanoate-CoA ligase in    |
| 0,202 | 0,065 | Homoaconitate hydratase inhibito    |
| 0,202 | 0,065 | Triacetate-lactonase inhibitor      |
| 0,146 | 0,008 | D-Serine ammonia-lyase inhibitor    |
| 0,199 | 0,062 | 2,4-Diaminopentanoate dehydrog      |
| 0,199 | 0,062 | Lysine 6-dehydrogenase inhibitor    |

|       |       |                                      |
|-------|-------|--------------------------------------|
| 0,199 | 0,062 | 3-Hydroxybutyryl-CoA dehydroger      |
| 0,159 | 0,022 | Ethanolamine kinase inhibitor        |
| 0,245 | 0,109 | Adenomatous polyposis treatment      |
| 0,174 | 0,038 | Estradiol 17alpha-dehydrogenase i    |
| 0,179 | 0,043 | SMN2 expression enhancer             |
| 0,151 | 0,015 | N-acetylglucosamine-6-phosphate      |
| 0,308 | 0,172 | MAP kinase stimulant                 |
| 0,161 | 0,025 | Diacylglycerol kinase inhibitor      |
| 0,151 | 0,015 | Ribulose-bisphosphate carboxylase    |
| 0,169 | 0,034 | Thiol S-methyltransferase inhibitor  |
| 0,196 | 0,061 | Acaricide                            |
| 0,153 | 0,018 | Glycoprotein-fucosylgalactoside al   |
| 0,210 | 0,076 | Ornithine cyclodeaminase inhibitor   |
| 0,138 | 0,004 | Sucrose-phosphate phosphatase ir     |
| 0,236 | 0,102 | Glycine-tRNA ligase inhibitor        |
| 0,158 | 0,024 | Ribonuclease inhibitor               |
| 0,238 | 0,104 | Steroid synthesis inhibitor          |
| 0,217 | 0,083 | Methanol dehydrogenase inhibitor     |
| 0,200 | 0,067 | CYP4A2 substrate                     |
| 0,183 | 0,049 | Cyclamate sulfohydrolase inhibitor   |
| 0,157 | 0,025 | Homocysteine desulfhydrase inhib     |
| 0,174 | 0,042 | 2,5-Dihydroxypyridine 5,6-dioxyge    |
| 0,195 | 0,063 | Urate-ribonucleotide phosphoryla     |
| 0,206 | 0,074 | Antiuremic                           |
| 0,205 | 0,073 | Arylacetonitrilase inhibitor         |
| 0,163 | 0,032 | Coagulant                            |
| 0,185 | 0,053 | Bile-salt sulfotransferase inhibitor |
| 0,177 | 0,046 | BRAF expression inhibitor            |
| 0,172 | 0,040 | 4-Phytase inhibitor                  |
| 0,162 | 0,030 | Antineoplastic, alkylator            |
| 0,263 | 0,132 | CYP2D6 substrate                     |
| 0,169 | 0,037 | Carboxymethylenebutenolidase in      |
| 0,203 | 0,072 | 15-Hydroxyprostaglandin-D dehyd      |
| 0,208 | 0,077 | CYP1A2 inducer                       |
| 0,232 | 0,101 | Hepatoprotectant                     |
| 0,159 | 0,028 | Malate dehydrogenase (oxaloacet      |
| 0,169 | 0,039 | Glutamate-1-semialdehyde 2,1-ar      |
| 0,150 | 0,020 | Ribose-5-phosphate-ammonia liga      |
| 0,252 | 0,122 | Enteropeptidase inhibitor            |
| 0,152 | 0,022 | Thiamine-phosphate diphosphoryl      |
| 0,178 | 0,048 | N-acetylneuraminase synthase inh     |
| 0,211 | 0,082 | Aminomuconate-semialdehyde de        |
| 0,158 | 0,028 | Nicotinamide-nucleotide adenylylt    |
| 0,173 | 0,044 | Pantoate 4-dehydrogenase inhibit     |
| 0,211 | 0,082 | Pseudouridylate synthase inhibitor   |
| 0,142 | 0,013 | L-lactate dehydrogenase (cytochrc    |
| 0,145 | 0,017 | Globoside alpha-N-acetylgalactosa    |

|       |       |                                    |
|-------|-------|------------------------------------|
| 0,172 | 0,044 | NAD(P)+ transhydrogenase (AB-sp    |
| 0,143 | 0,015 | [hydroxymethylglutaryl-CoA reduc   |
| 0,171 | 0,043 | Alpha-pinene-oxide decyclase inhi  |
| 0,150 | 0,023 | Octadecanal decarbonylase inhibit  |
| 0,171 | 0,044 | 2-Nitropropane dioxygenase inhib   |
| 0,226 | 0,099 | Angiogenesis stimulant             |
| 0,148 | 0,021 | Vanillyl-alcohol oxidase inhibitor |
| 0,168 | 0,042 | Methylglutamate dehydrogenase i    |
| 0,145 | 0,018 | N-acetylglucosamine kinase inhibit |
| 0,215 | 0,088 | Aspergillopepsin II inhibitor      |
| 0,251 | 0,125 | 4-Hydroxyproline epimerase inhibi  |
| 0,180 | 0,054 | Aldehyde dehydrogenase inhibitor   |
| 0,155 | 0,029 | Site-specific DNA-methyltransfera: |
| 0,155 | 0,030 | Gluconate dehydratase inhibitor    |
| 0,141 | 0,016 | Phosphogluconate dehydrogenase     |
| 0,151 | 0,027 | Succinate dehydrogenase inhibitor  |
| 0,198 | 0,074 | Antihematotoxic                    |
| 0,163 | 0,039 | D-2-hydroxy-acid dehydrogenase i   |
| 0,143 | 0,019 | Gluconokinase inhibitor            |
| 0,206 | 0,082 | Carminative                        |
| 0,143 | 0,019 | Interleukin 10 antagonist          |
| 0,192 | 0,069 | Anthelmintic (Fasciola)            |
| 0,229 | 0,105 | Phospholipase C inhibitor          |
| 0,190 | 0,067 | 4-Hydroxyglutamate transaminase    |
| 0,172 | 0,048 | Iodide peroxidase inhibitor        |
| 0,160 | 0,037 | Galactoside O-acetyltransferase in |
| 0,272 | 0,149 | Vasodilator, coronary              |
| 0,162 | 0,039 | Poly(ADP-ribose) glycohydrolase ir |
| 0,139 | 0,016 | Beta-Lysine 5,6-aminomutase inhi   |
| 0,167 | 0,044 | Allophanate hydrolase inhibitor    |
| 0,183 | 0,061 | Lombricine kinase inhibitor        |
| 0,136 | 0,014 | Aspartate 1-decarboxylase inhibitc |
| 0,188 | 0,065 | Creatinine deaminase inhibitor     |
| 0,147 | 0,025 | 3-Oxosteroid 1-dehydrogenase inf   |
| 0,151 | 0,030 | CYP2B4 substrate                   |
| 0,160 | 0,039 | L-lysine 6-transaminase inhibitor  |
| 0,142 | 0,021 | Ribose-5-phosphate isomerase inh   |
| 0,199 | 0,077 | Antimutagenic                      |
| 0,153 | 0,032 | D-glutamate oxidase inhibitor      |
| 0,136 | 0,015 | Pyridoxamine-phosphate oxidase i   |
| 0,268 | 0,148 | Superoxide dismutase inhibitor     |
| 0,151 | 0,031 | Glycine transaminase inhibitor     |
| 0,166 | 0,046 | Beta-cyclopiazonate dehydrogena:   |
| 0,162 | 0,043 | Phenylacetaldehyde dehydrogena:    |
| 0,160 | 0,041 | Succinic dehydrogenase inhibitor   |
| 0,137 | 0,018 | Galactosylceramide sulfottransfera |
| 0,153 | 0,034 | Allantoicase inhibitor             |

|       |       |                                                |
|-------|-------|------------------------------------------------|
| 0,172 | 0,053 | Niemann-Pick C1-like 1 protein anti            |
| 0,231 | 0,112 | Aldosterone antagonist                         |
| 0,154 | 0,036 | Trimethyllysine dioxygenase inhibi             |
| 0,130 | 0,012 | Adrenaline agonist                             |
| 0,165 | 0,046 | Hepatocyte nuclear factor antagor              |
| 0,165 | 0,046 | Hepatocyte nuclear factor 4 alpha              |
| 0,157 | 0,039 | Saccharopine dehydrogenase (NAI                |
| 0,186 | 0,069 | CYP1B substrate                                |
| 0,174 | 0,056 | 3-Aminobutyryl-CoA ammonia-lya                 |
| 0,142 | 0,025 | Leukotriene agonist                            |
| 0,148 | 0,031 | Aconitate decarboxylase inhibitor              |
| 0,208 | 0,091 | UGT1A6 substrate                               |
| 0,139 | 0,022 | Ribonuclease U2 inhibitor                      |
| 0,137 | 0,020 | GlutaminyI-tRNA synthase (glutam               |
| 0,184 | 0,068 | 6-Pyruvoyltetrahydropterin syntha              |
| 0,254 | 0,137 | Lysyl oxidase inhibitor                        |
| 0,160 | 0,044 | Cysteine-S-conjugate beta-lyase in             |
| 0,148 | 0,032 | Oxoglutarate dehydrogenase (lipo               |
| 0,156 | 0,040 | Phosphonoacetate hydrolase inhi                |
| 0,130 | 0,015 | Phosphoglucomutase inhibitor                   |
| 0,141 | 0,026 | 2-Hydroxy-3-oxopropionate reduc                |
| 0,123 | 0,008 | Fatty acid synthase inhibitor                  |
| 0,277 | 0,163 | Prion diseases treatment                       |
| 0,193 | 0,079 | Blasticidin-S deaminase inhibitor              |
| 0,128 | 0,013 | Ca <sup>2+</sup> -transporting ATPase inhibito |
| 0,150 | 0,035 | Pantothenase inhibitor                         |
| 0,135 | 0,021 | 3-Deoxy-7-phosphoheptulonate sy                |
| 0,222 | 0,108 | X-methyl-His dipeptidase inhibitor             |
| 0,122 | 0,008 | N-acetylglucosaminyldiphosphoun                |
| 0,212 | 0,098 | Renal tissue kallikrein inhibitor              |
| 0,123 | 0,010 | 1-Alkyl-2-acetylglycerol O-acyltran            |
| 0,125 | 0,012 | Paget's disease treatment                      |
| 0,171 | 0,058 | Tryptophan alpha,beta-oxidase in               |
| 0,208 | 0,095 | Salicylate 1-monooxygenase inhibi              |
| 0,166 | 0,054 | 3-Hydroxyanthranilate oxidase inh              |
| 0,159 | 0,047 | Glucan endo-1,3-alpha-glucosidase              |
| 0,181 | 0,069 | 3-Hydroxybenzoate 4-monooxyge                  |
| 0,154 | 0,042 | Sarcosine oxidase inhibitor                    |
| 0,219 | 0,107 | Platelet aggregation inhibitor                 |
| 0,127 | 0,015 | CYP26 substrate                                |
| 0,133 | 0,021 | Amino-acid racemase inhibitor                  |
| 0,202 | 0,090 | Aromatic-hydroxylamine O-acetylt               |
| 0,206 | 0,095 | 1,2-alpha-L-fucosidase inhibitor               |
| 0,241 | 0,130 | CYP2B6 substrate                               |
| 0,188 | 0,077 | Camphor 1,2-monooxygenase inhi                 |
| 0,171 | 0,060 | Magnesium-protoporphyrin IX me                 |
| 0,159 | 0,048 | Selenocysteine lyase inhibitor                 |

|       |       |                                    |
|-------|-------|------------------------------------|
| 0,202 | 0,092 | Carnitinamidase inhibitor          |
| 0,144 | 0,034 | Malonate-semialdehyde dehydrog     |
| 0,155 | 0,045 | Prephenate dehydrogenase inhibit   |
| 0,188 | 0,078 | Tripeptidyl-peptidase I inhibitor  |
| 0,121 | 0,011 | Hematinic                          |
| 0,134 | 0,024 | Chelator                           |
| 0,217 | 0,107 | DNA-3-methyladenine glycosylase    |
| 0,152 | 0,042 | 4,5-Dihydroxyphthalate decarboxy   |
| 0,146 | 0,036 | Azobenzene reductase inhibitor     |
| 0,176 | 0,067 | Allyl-alcohol dehydrogenase inhibi |
| 0,135 | 0,025 | 2-Dehydro-3-deoxy-L-arabinonate    |
| 0,234 | 0,124 | Thiosulfate dehydrogenase inhibit  |
| 0,147 | 0,038 | Aryl-aldehyde dehydrogenase (NA    |
| 0,163 | 0,054 | Isoquinoline 1-oxidoreductase inhi |
| 0,121 | 0,013 | Serine-tRNA ligase inhibitor       |
| 0,154 | 0,046 | Interferon antagonist              |
| 0,148 | 0,040 | Glycine receptor agonist           |
| 0,116 | 0,009 | CMP-KDO synthase inhibitor         |
| 0,130 | 0,023 | CYP4F substrate                    |
| 0,205 | 0,097 | Peroxidase substrate               |
| 0,175 | 0,068 | Aminopeptidase Y inhibitor         |
| 0,135 | 0,028 | Proline dehydrogenase inhibitor    |
| 0,249 | 0,142 | CYP2D substrate                    |
| 0,165 | 0,058 | Inositol oxygenase inhibitor       |
| 0,153 | 0,046 | Serine 3-dehydrogenase inhibitor   |
| 0,154 | 0,047 | 2-Oxoisovalerate dehydrogenase (   |
| 0,153 | 0,047 | N4-(beta-N-acetylglucosaminy)-L-   |
| 0,150 | 0,043 | Dethiobiotin synthase inhibitor    |
| 0,209 | 0,103 | Oxytocic                           |
| 0,159 | 0,053 | Valine-tRNA ligase inhibitor       |
| 0,136 | 0,030 | Pyridoxal kinase inhibitor         |
| 0,210 | 0,105 | Antipyretic                        |
| 0,109 | 0,004 | Sucrose phosphorylase inhibitor    |
| 0,129 | 0,024 | Succinate-hydroxymethylglutarate   |
| 0,137 | 0,032 | Decylcitrate synthase inhibitor    |
| 0,148 | 0,043 | Adenosylmethionine-8-amino-7-o;    |
| 0,146 | 0,041 | Omega-amidase inhibitor            |
| 0,135 | 0,031 | Anabolic                           |
| 0,149 | 0,044 | Interferon gamma antagonist        |
| 0,115 | 0,011 | GMP synthase inhibitor             |
| 0,135 | 0,032 | NMDA receptor polyamine site an    |
| 0,130 | 0,026 | Oxaloacetate decarboxylase inhibi  |
| 0,132 | 0,029 | Antibiotic Anthracycline-like      |
| 0,133 | 0,030 | Cystathionine beta-lyase inhibitor |
| 0,292 | 0,189 | Antinociceptive                    |
| 0,119 | 0,017 | Malate synthase inhibitor          |
| 0,201 | 0,098 | CYP1A1 inhibitor                   |

|       |       |                                        |
|-------|-------|----------------------------------------|
| 0,178 | 0,075 | Guanidinoacetase inhibitor             |
| 0,256 | 0,153 | Endopeptidase So inhibitor             |
| 0,143 | 0,041 | Glycine hydroxymethyltransferase       |
| 0,181 | 0,079 | Ketol-acid reductoisomerase inhib      |
| 0,116 | 0,015 | Alpha,alpha-trehalose phosphoryl       |
| 0,152 | 0,050 | Creatine kinase inhibitor              |
| 0,103 | 0,002 | Cholesterol absorption inhibitor       |
| 0,137 | 0,036 | Cytosine deaminase inhibitor           |
| 0,124 | 0,023 | Long-chain-fatty-acid-CoA ligase in    |
| 0,106 | 0,005 | Glycerate kinase inhibitor             |
| 0,158 | 0,057 | Iron-cytochrome-c reductase inhi       |
| 0,144 | 0,043 | Choloylglycine hydrolase inhibitor     |
| 0,223 | 0,122 | Aldehyde dehydrogenase (pyrrolo        |
| 0,149 | 0,048 | Succinate-CoA ligase (ADP-forming      |
| 0,147 | 0,047 | D-lactate dehydrogenase (cytochr       |
| 0,167 | 0,067 | Gametolysin inhibitor                  |
| 0,155 | 0,055 | Glucuronolactone reductase inhi        |
| 0,147 | 0,047 | Membrane dipeptidase inhibitor         |
| 0,119 | 0,020 | 3-Dehydroquinatase dehydratase in      |
| 0,109 | 0,010 | Preterm labor treatment                |
| 0,174 | 0,075 | Thimet oligopeptidase inhibitor        |
| 0,104 | 0,005 | Dual specificity protein phosphata     |
| 0,112 | 0,014 | Protein 30S ribosomal subunit inhi     |
| 0,165 | 0,066 | Oxalate oxidase inhibitor              |
| 0,181 | 0,082 | Proteasome endopeptidase compl         |
| 0,148 | 0,050 | Radical formation agonist              |
| 0,183 | 0,085 | Phenylalanine(histidine) transamir     |
| 0,143 | 0,045 | Cholate-CoA ligase inhibitor           |
| 0,165 | 0,067 | Trans-pentaprenyltranstransferase      |
| 0,229 | 0,131 | CYP2C29 substrate                      |
| 0,131 | 0,034 | Rhodopsin kinase inhibitor             |
| 0,140 | 0,042 | Guanidinodeoxy-scylo-inositol-4- $\mu$ |
| 0,162 | 0,065 | Gly-X carboxypeptidase inhibitor       |
| 0,105 | 0,008 | UGT2B19 substrate                      |
| 0,105 | 0,008 | UGT2B30 substrate                      |
| 0,105 | 0,008 | UGT2B23 substrate                      |
| 0,105 | 0,008 | UGT2B4E substrate                      |
| 0,105 | 0,008 | UGT2B4D substrate                      |
| 0,152 | 0,055 | Homogentisate 1,2-dioxygenase ir       |
| 0,173 | 0,076 | Aldehyde dehydrogenase 2 substr        |
| 0,127 | 0,030 | Guanylate kinase inhibitor             |
| 0,120 | 0,024 | Monocarboxylic acid transporter 1      |
| 0,120 | 0,024 | Monocarboxylic acid transporter ii     |
| 0,104 | 0,009 | Sucrose alpha-glucosidase inhibito     |
| 0,166 | 0,071 | Acetylspermidine deacetylase inhi      |
| 0,131 | 0,036 | Orotate reductase (NADPH) inhibi       |
| 0,111 | 0,016 | Chitin deacetylase inhibitor           |

|       |       |                                    |
|-------|-------|------------------------------------|
| 0,099 | 0,004 | Glucose-6-phosphate isomerase ir   |
| 0,123 | 0,028 | Isocitrate lyase inhibitor         |
| 0,113 | 0,018 | Alpha-1,6-mannosyl-glycoprotein (  |
| 0,177 | 0,082 | Guanidinoacetate kinase inhibitor  |
| 0,172 | 0,078 | CDP-4-dehydro-6-deoxyglucose re    |
| 0,098 | 0,004 | Riboflavin synthase inhibitor      |
| 0,116 | 0,022 | 2-Methylcitrate synthase inhibitor |
| 0,135 | 0,041 | Demethylsterigmatocystin 6-O-me    |
| 0,166 | 0,072 | Catalase inhibitor                 |
| 0,148 | 0,054 | Prepilin peptidase inhibitor       |
| 0,148 | 0,054 | Haloacetate dehalogenase inhibito  |
| 0,127 | 0,034 | 3-Hydroxybutyrate dehydrogenase    |
| 0,132 | 0,039 | Cyclooxygenase 1 substrate         |
| 0,134 | 0,041 | Creatinase inhibitor               |
| 0,126 | 0,033 | CTP synthase inhibitor             |
| 0,188 | 0,096 | Alanine-tRNA ligase inhibitor      |
| 0,150 | 0,057 | Galactose 1-dehydrogenase (NADP    |
| 0,150 | 0,057 | Beta-alanine-pyruvate transamina   |
| 0,131 | 0,039 | Aerobactin synthase inhibitor      |
| 0,211 | 0,119 | 2-Haloacid dehalogenase inhibitor  |
| 0,145 | 0,053 | Alcohol dehydrogenase substrate    |
| 0,173 | 0,081 | Acetylornithine deacetylase inhibi |
| 0,228 | 0,137 | Cardiotonic                        |
| 0,262 | 0,171 | Amine dehydrogenase inhibitor      |
| 0,124 | 0,033 | Acyl-CoA dehydrogenase (NADP+)     |
| 0,244 | 0,154 | Loop diuretic                      |
| 0,106 | 0,015 | Altronate dehydratase inhibitor    |
| 0,158 | 0,067 | (R,R)-butanediol dehydrogenase ir  |
| 0,101 | 0,011 | Ceramidase inhibitor               |
| 0,095 | 0,005 | Antiviral (Parainfluenza)          |
| 0,111 | 0,020 | 4-Pyridoxolactonase inhibitor      |
| 0,141 | 0,050 | D-cysteine desulfhydrase inhibitor |
| 0,111 | 0,021 | Alpha,alpha-trehalose-phosphate :  |
| 0,125 | 0,035 | Dichloromuconate cycloisomerase    |
| 0,179 | 0,090 | Antiosteoporotic                   |
| 0,104 | 0,014 | mRNA (guanine-N7-)-methyltransf    |
| 0,121 | 0,031 | Cell wall synthesis inhibitor      |
| 0,127 | 0,037 | Polynucleotide adenylyltransferas  |
| 0,131 | 0,041 | Nucleotidase inhibitor             |
| 0,139 | 0,050 | Acyl-CoA hydrolase inhibitor       |
| 0,139 | 0,050 | Palmitoyl-CoA hydrolase inhibitor  |
| 0,168 | 0,078 | Antineoplastic (thyroid cancer)    |
| 0,134 | 0,044 | L-ascorbate peroxidase inhibitor   |
| 0,097 | 0,008 | Carboxy-cis,cis-muconate cyclase i |
| 0,143 | 0,054 | tRNA adenylyltransferase inhibitor |
| 0,149 | 0,060 | Saccharolysin inhibitor            |
| 0,118 | 0,029 | 6,7-Dihydropteridine reductase inl |



|       |       |                                                     |
|-------|-------|-----------------------------------------------------|
| 0,147 | 0,058 | Dihydrouracil dehydrogenase (NAI                    |
| 0,130 | 0,041 | Trimethylamine-N-oxide reductase                    |
| 0,127 | 0,038 | tRNA (cytosine-5-)-methyltransferase                |
| 0,125 | 0,037 | Tyrosine-ester sulfotransferase inhibitor           |
| 0,098 | 0,010 | Hydroxypyruvate reductase inhibitor                 |
| 0,150 | 0,062 | CYP4B substrate                                     |
| 0,144 | 0,056 | Biotin carboxylase inhibitor                        |
| 0,116 | 0,029 | Aspartate-semialdehyde dehydrogenase                |
| 0,188 | 0,101 | Opine dehydrogenase inhibitor                       |
| 0,199 | 0,111 | TRPA1 agonist                                       |
| 0,105 | 0,018 | Quinate 5-dehydrogenase inhibitor                   |
| 0,188 | 0,101 | Mandelate 4-monooxygenase inhibitor                 |
| 0,100 | 0,013 | Alpha-1,6-mannosyl-glycoprotein 4-epimerase         |
| 0,201 | 0,114 | Hematopoietic                                       |
| 0,212 | 0,125 | Thiamine-triphosphatase inhibitor                   |
| 0,111 | 0,024 | 4-Hydroxy-2-oxoglutarate aldolase                   |
| 0,109 | 0,023 | Glucosamine 6-phosphate N-acetyltransferase         |
| 0,096 | 0,010 | 4-Hydroxyphenylacetate 1-monooxygenase              |
| 0,176 | 0,089 | Menstruation disorders treatment                    |
| 0,127 | 0,041 | Glutamate decarboxylase inhibitor                   |
| 0,129 | 0,044 | Cytochrome-c3 hydrogenase inhibitor                 |
| 0,135 | 0,050 | (R)-limonene 6-monooxygenase inhibitor              |
| 0,106 | 0,021 | L-Iditol 2-dehydrogenase inhibitor                  |
| 0,108 | 0,023 | (S)-2-Methylmalate dehydratase inhibitor            |
| 0,142 | 0,058 | CYP4B1 substrate                                    |
| 0,159 | 0,074 | CNS active muscle relaxant                          |
| 0,159 | 0,075 | Procollagen C-endopeptidase inhibitor               |
| 0,138 | 0,054 | Lysine 2-monooxygenase inhibitor                    |
| 0,134 | 0,050 | Glutamine-tRNA ligase inhibitor                     |
| 0,142 | 0,058 | Excitatory amino acid transporter                   |
| 0,235 | 0,152 | Nicotinate dehydrogenase inhibitor                  |
| 0,111 | 0,027 | Sulfinoalanine decarboxylase inhibitor              |
| 0,110 | 0,026 | 4-Hydroxybenzoate 3-monooxygenase                   |
| 0,090 | 0,006 | Phosphoglycerate phosphatase inhibitor              |
| 0,251 | 0,168 | Antipruritic                                        |
| 0,090 | 0,006 | Tartrate decarboxylase inhibitor                    |
| 0,199 | 0,116 | CYP2B substrate                                     |
| 0,143 | 0,061 | Valine decarboxylase inhibitor                      |
| 0,106 | 0,024 | Pyruvate, phosphate dikinase inhibitor              |
| 0,111 | 0,029 | Aminolevulinatase transaminase inhibitor            |
| 0,146 | 0,064 | UGT1A7 substrate                                    |
| 0,109 | 0,027 | Antidote, heavy metal                               |
| 0,173 | 0,092 | Thermitase inhibitor                                |
| 0,085 | 0,004 | Membrane-oligosaccharide glycosyltransferase        |
| 0,103 | 0,022 | Lactate-malate transhydrogenase                     |
| 0,092 | 0,011 | Diphosphate-fructose-6-phosphate 1,6-bisphosphatase |
| 0,101 | 0,020 | Steroid sulfotransferase inhibitor                  |

|       |       |                                     |
|-------|-------|-------------------------------------|
| 0,129 | 0,049 | 3-Methyl-2-oxobutanoate hydroxy     |
| 0,138 | 0,058 | Carnitine 3-dehydrogenase inhibiti  |
| 0,109 | 0,029 | S-methyl-5-thioribose kinase inhib  |
| 0,121 | 0,041 | Glutamine-pyruvate transaminase     |
| 0,107 | 0,027 | [myelin basic protein]-arginine N-r |
| 0,109 | 0,029 | 1-Pyrroline-5-carboxylate dehydro   |
| 0,118 | 0,039 | CMP-N-acylneuramate phospho         |
| 0,097 | 0,018 | 3-Methyl-2-oxobutanoate dehydr      |
| 0,229 | 0,150 | Cardioprotectant                    |
| 0,190 | 0,111 | Hydroxylamine reductase inhibitor   |
| 0,128 | 0,048 | Alkanal monooxygenase (FMN-link     |
| 0,135 | 0,056 | Formate dehydrogenase inhibitor     |
| 0,126 | 0,047 | Leucine transaminase inhibitor      |
| 0,226 | 0,148 | Antiviral (Influenza A)             |
| 0,096 | 0,017 | Mandelate racemase inhibitor        |
| 0,137 | 0,059 | (S)-2-hydroxy-acid oxidase inhibiti |
| 0,096 | 0,018 | Malate dehydrogenase (decarboxy)    |
| 0,108 | 0,030 | Alanine dehydrogenase inhibitor     |
| 0,123 | 0,045 | 2-Nitrophenol 2-monooxygenase i     |
| 0,111 | 0,033 | Indole-3-acetaldehyde reductase (   |
| 0,129 | 0,051 | Phosphoserine phosphatase inhibi    |
| 0,152 | 0,075 | Glutamate (mGluR5) agonist          |
| 0,224 | 0,147 | Analgesic stimulant                 |
| 0,100 | 0,023 | Mannitol-1-phosphate 5-dehydrog     |
| 0,134 | 0,057 | Pyroglutamyl-peptidase I inhibitor  |
| 0,126 | 0,049 | Asparaginase inhibitor              |
| 0,095 | 0,018 | Inositol 1,4,5-triphosphate recept  |
| 0,082 | 0,006 | Glucosylceramidase inhibitor        |
| 0,113 | 0,037 | Cysteine transaminase inhibitor     |
| 0,172 | 0,096 | GABA B receptor agonist             |
| 0,115 | 0,039 | Deoxyribonuclease (pyrimidine dir   |
| 0,085 | 0,010 | Protein N-acetylglucosaminyltrans   |
| 0,123 | 0,048 | DNA-3-methyladenine glycosylase     |
| 0,094 | 0,019 | Protein 50S ribosomal subunit inhi  |
| 0,124 | 0,049 | Aspartate transaminase inhibitor    |
| 0,092 | 0,018 | Nicotinate phosphoribosyltransfer   |
| 0,113 | 0,039 | Thiosulfate sulfurtransferase inhib |
| 0,110 | 0,036 | Tyrosine 2,3-aminomutase inhibiti   |
| 0,090 | 0,017 | Hydroxylysine kinase inhibitor      |
| 0,160 | 0,087 | 4-Chlorophenylacetate 3,4-dioxyg    |
| 0,121 | 0,047 | Lactoylglutathione lyase inhibitor  |
| 0,091 | 0,018 | D-lactate-2-sulfatase inhibitor     |
| 0,108 | 0,035 | 2-Methyleneglutarate mutase inhi    |
| 0,115 | 0,042 | Leucine-tRNA ligase inhibitor       |
| 0,117 | 0,044 | Cystathionine beta-synthase inhibi  |
| 0,092 | 0,019 | Beta-1,4-mannosyl-glycoprotein 4-   |
| 0,107 | 0,034 | Argininosuccinate lyase inhibitor   |

|       |       |                                     |
|-------|-------|-------------------------------------|
| 0,085 | 0,012 | Antibiotic Aminoglycoside-like      |
| 0,160 | 0,088 | CYP2D1 substrate                    |
| 0,113 | 0,041 | Threonine ammonia-lyase inhibitor   |
| 0,139 | 0,066 | Aldehyde dehydrogenase (NAD+) i     |
| 0,107 | 0,034 | Phosphomevalonate kinase inhibit    |
| 0,102 | 0,030 | Isocitrate dehydrogenase (NADP+)    |
| 0,171 | 0,099 | Septic shock treatment              |
| 0,155 | 0,083 | Aspartoacylase inhibitor            |
| 0,090 | 0,018 | GTP cyclohydrolase I inhibitor      |
| 0,089 | 0,017 | Pyruvate, water dikinase inhibitor  |
| 0,108 | 0,037 | Serine-glyoxylate transaminase inl  |
| 0,112 | 0,041 | Nucleotide diphosphatase inhibito   |
| 0,084 | 0,013 | Aldehyde dehydrogenase 1A2 inhi     |
| 0,105 | 0,034 | tRNA (guanine-N2-)-methyltransfe    |
| 0,100 | 0,029 | Cyanate hydratase inhibitor         |
| 0,108 | 0,038 | Hypercalcemia treatment             |
| 0,104 | 0,034 | 2-Methylcitrate dehydratase inhib   |
| 0,237 | 0,168 | Diuretic inhibitor                  |
| 0,249 | 0,179 | Antiinflammatory, ophthalmic        |
| 0,119 | 0,050 | Aspartate-ammonia ligase (ADP-fc    |
| 0,093 | 0,023 | Hydroperoxide dehydratase inhibi    |
| 0,100 | 0,031 | Betaine-aldehyde dehydrogenase      |
| 0,124 | 0,055 | Glycine N-acyltransferase inhibitor |
| 0,143 | 0,074 | Hypoxia inducible factor 1 alpha in |
| 0,107 | 0,038 | Saccharopine dehydrogenase (NAL     |
| 0,106 | 0,038 | D-alanine transaminase inhibitor    |
| 0,144 | 0,075 | Methylaspartate ammonia-lyase ir    |
| 0,073 | 0,005 | Electron transport complex I inhibi |
| 0,131 | 0,063 | Adenylate cyclase inhibitor         |
| 0,116 | 0,048 | Ornithine-oxo-acid transaminase i   |
| 0,193 | 0,125 | Taurine-2-oxoglutarate transamin    |
| 0,092 | 0,024 | Oxaloacetate tautomerase inhibito   |
| 0,252 | 0,185 | Antinephritic                       |
| 0,177 | 0,109 | UGT1A substrate                     |
| 0,181 | 0,114 | Pitirilysin inhibitor               |
| 0,133 | 0,066 | Skin whitener                       |
| 0,077 | 0,010 | 4-Hydroxyphenylpyruvate dioxyge     |
| 0,212 | 0,145 | 3C-like protease (Human coronavi    |
| 0,080 | 0,014 | Biotin-[methylmalonyl-CoA-carbo     |
| 0,071 | 0,005 | NADPH oxidoreductase inhibitor      |
| 0,180 | 0,114 | Antiviral (Hepatitis B)             |
| 0,091 | 0,025 | Prostaglandin D2 agonist            |
| 0,089 | 0,024 | Procollagen glucosyltransferase in  |
| 0,120 | 0,054 | Coproporphyrinogen oxidase inhi     |
| 0,069 | 0,004 | Beta glucosidase inhibitor          |
| 0,130 | 0,065 | UGT2B1 substrate                    |
| 0,091 | 0,026 | Enoyl-CoA hydratase inhibitor       |

|       |       |                                     |
|-------|-------|-------------------------------------|
| 0,090 | 0,025 | Pyruvate kinase inhibitor           |
| 0,145 | 0,080 | N-Acyl-D-amino-acid deacylase inh   |
| 0,083 | 0,018 | Glutamate (mGluR1) agonist          |
| 0,115 | 0,050 | Ribitol 2-dehydrogenase inhibitor   |
| 0,127 | 0,062 | Methionine decarboxylase inhibito   |
| 0,149 | 0,085 | Mitochondrial intermediate peptic   |
| 0,095 | 0,031 | [acyl-carrier-protein] S-malonyltra |
| 0,114 | 0,050 | Glutamate dehydrogenase inhibito    |
| 0,152 | 0,088 | CYP2B1 substrate                    |
| 0,078 | 0,014 | Fructokinase inhibitor              |
| 0,084 | 0,021 | Diiodotyrosine transaminase inhib   |
| 0,081 | 0,018 | 3'(2'),5'-Bisphosphate nucleotidas  |
| 0,089 | 0,026 | Hydroxyquinol 1,2-dioxygenase inl   |
| 0,124 | 0,060 | Cysteine desulfurase inhibitor      |
| 0,130 | 0,066 | Myocardial ischemia treatment       |
| 0,091 | 0,028 | NAD+ nucleosidase inhibitor         |
| 0,077 | 0,014 | Pyridoxamine-oxaloacetate transa    |
| 0,085 | 0,022 | Butyryl-CoA dehydrogenase inhibi    |
| 0,070 | 0,008 | Orotidylate decarboxylase inhibito  |
| 0,155 | 0,093 | Benzoate 4-monooxygenase inhibi     |
| 0,086 | 0,024 | 4-Hydroxybenzoate 1-hydroxylase     |
| 0,087 | 0,025 | Methylthioadenosine nucleosidas     |
| 0,108 | 0,046 | Glutamine synthetase inhibitor      |
| 0,087 | 0,025 | NMN nucleosidase inhibitor          |
| 0,090 | 0,028 | Methionine adenosyltransferase ir   |
| 0,121 | 0,060 | 3-Hydroxyacyl-CoA dehydrogenase     |
| 0,120 | 0,059 | Inositol 1,4,5-trisphosphate 3-kina |
| 0,193 | 0,132 | Saluretic                           |
| 0,133 | 0,072 | Gingipain R inhibitor               |
| 0,170 | 0,109 | Prostaglandin E1 antagonist         |
| 0,129 | 0,068 | UGT1A8 substrate                    |
| 0,147 | 0,086 | Pyridoxine 4-oxidase inhibitor      |
| 0,108 | 0,047 | CYP4A1 substrate                    |
| 0,126 | 0,066 | Thromboxane synthase stimulant      |
| 0,104 | 0,044 | Glutathione-disulfide reductase inl |
| 0,119 | 0,059 | Adenine deaminase inhibitor         |
| 0,120 | 0,060 | Aldehyde dehydrogenase [NAD(P)]     |
| 0,077 | 0,017 | Nucleoside deoxyribosyltransferas   |
| 0,072 | 0,012 | Formate C-acetyltransferase inhibi  |
| 0,094 | 0,034 | Deoxycytidine kinase inhibitor      |
| 0,212 | 0,152 | Opioid dependency treatment         |
| 0,089 | 0,029 | 4-Hydroxybenzoate decarboxylase     |
| 0,103 | 0,043 | Glycine N-benzoyltransferase inhi   |
| 0,065 | 0,005 | Rotamase (FKBP) inhibitor           |
| 0,064 | 0,005 | Transaldolase inhibitor             |
| 0,119 | 0,060 | CYP3C substrate                     |
| 0,134 | 0,075 | Clostripain inhibitor               |

|       |       |                                                          |
|-------|-------|----------------------------------------------------------|
| 0,083 | 0,025 | Histidine-tRNA ligase inhibitor                          |
| 0,076 | 0,018 | Phosphoketolase inhibitor                                |
| 0,130 | 0,072 | N-carbamoyl-L-amino-acid hydrolase                       |
| 0,091 | 0,033 | Long-chain-acyl-CoA dehydrogenase                        |
| 0,088 | 0,031 | Citrate (Si)-synthase inhibitor                          |
| 0,099 | 0,042 | Muconate cycloisomerase inhibitor                        |
| 0,078 | 0,022 | Nicotinate-nucleotide diphosphorylase                    |
| 0,081 | 0,025 | Thioether S-methyltransferase inhibitor                  |
| 0,093 | 0,037 | Cysteine-tRNA ligase inhibitor                           |
| 0,090 | 0,034 | Aspartate carbamoyltransferase inhibitor                 |
| 0,066 | 0,010 | Fructose 5-dehydrogenase (NADP-dependent)                |
| 0,133 | 0,077 | Trans-1,2-dihydrobenzene-1,2-diol dehydrogenase          |
| 0,126 | 0,070 | Phosphorylase b inhibitor                                |
| 0,105 | 0,049 | Pteridine reductase inhibitor                            |
| 0,076 | 0,021 | D-Alanine-poly(phosphoribitol) ligase                    |
| 0,196 | 0,141 | CYP2C11 substrate                                        |
| 0,079 | 0,024 | UDP-glucose 6-dehydrogenase inhibitor                    |
| 0,118 | 0,063 | Formaldehyde dehydrogenase (glutathione-dependent)       |
| 0,172 | 0,117 | Spasmolytic, Papaverin-like                              |
| 0,170 | 0,116 | CYP1A inducer                                            |
| 0,102 | 0,048 | Heme oxygenase inhibitor                                 |
| 0,079 | 0,025 | Prostaglandin agonist                                    |
| 0,140 | 0,086 | Peptide-tryptophan 2,3-dioxygenase                       |
| 0,190 | 0,136 | CYP2B2 substrate                                         |
| 0,131 | 0,077 | UGT1A10 substrate                                        |
| 0,058 | 0,005 | ATPase (Vacuolar H+) inhibitor                           |
| 0,059 | 0,006 | Alpha-N-acetylgalactosaminide alpha-L-fucosyltransferase |
| 0,115 | 0,062 | Glucosamine-1-phosphate N-acetyltransferase              |
| 0,114 | 0,061 | Sulfotransferase substrate                               |
| 0,188 | 0,135 | NF-E2-related factor 2 stimulant                         |
| 0,120 | 0,067 | DNA directed DNA polymerase inhibitor                    |
| 0,256 | 0,204 | RNA-directed RNA polymerase inhibitor                    |
| 0,068 | 0,017 | D(-)-tartrate dehydratase inhibitor                      |
| 0,065 | 0,013 | Thymidine-triphosphatase inhibitor                       |
| 0,074 | 0,023 | Tannase inhibitor                                        |
| 0,133 | 0,082 | Catechol oxidase inhibitor                               |
| 0,093 | 0,042 | UDP-N-acetylmuramate dehydrogenase                       |
| 0,089 | 0,038 | Maleate hydratase inhibitor                              |
| 0,114 | 0,064 | Arginine deiminase inhibitor                             |
| 0,068 | 0,017 | CYP17 substrate                                          |
| 0,123 | 0,073 | CYP19 substrate                                          |
| 0,080 | 0,030 | dUTP diphosphatase inhibitor                             |
| 0,100 | 0,050 | D-proline reductase (dithiol) inhibitor                  |
| 0,076 | 0,026 | Cellulose synthase (UDP-forming)                         |
| 0,082 | 0,033 | N-acylneuraminate cytidylyltransferase                   |
| 0,091 | 0,041 | Cystathionine gamma-lyase inhibitor                      |
| 0,088 | 0,038 | ATP deaminase inhibitor                                  |

|       |       |                                                           |
|-------|-------|-----------------------------------------------------------|
| 0,082 | 0,033 | FAD diphosphatase inhibitor                               |
| 0,111 | 0,062 | Aspartate racemase inhibitor                              |
| 0,069 | 0,020 | Eicosanoid agonist                                        |
| 0,095 | 0,046 | Pyrroline-5-carboxylate reductase                         |
| 0,084 | 0,035 | L-3-cyanoalanine synthase inhibitor                       |
| 0,065 | 0,016 | Na+ K+ transporting ATPase inhibitor                      |
| 0,100 | 0,052 | Sphingomyelinase inhibitor                                |
| 0,089 | 0,041 | 3(or 17)beta-hydroxysteroid dehydrogenase inhibitor       |
| 0,064 | 0,016 | Histone-arginine N-methyltransferase inhibitor            |
| 0,133 | 0,085 | Acrosin inhibitor                                         |
| 0,080 | 0,031 | Anesthetic inhalation                                     |
| 0,072 | 0,024 | Stipitatonate decarboxylase inhibitor                     |
| 0,062 | 0,015 | N-acetylglucosaminyl diphosphodolichol synthase inhibitor |
| 0,075 | 0,027 | Acidifying agent gastric                                  |
| 0,101 | 0,053 | SULT1A3 substrate                                         |
| 0,100 | 0,052 | Acetoacetate decarboxylase inhibitor                      |
| 0,107 | 0,060 | Putrescine oxidase inhibitor                              |
| 0,065 | 0,018 | Glycolaldehyde dehydrogenase inhibitor                    |
| 0,066 | 0,019 | Phosphoribosylformylglycinamidine synthase inhibitor      |
| 0,139 | 0,092 | Thioredoxin reductase inhibitor                           |
| 0,059 | 0,012 | Diphosphate-serine phosphotransferase inhibitor           |
| 0,068 | 0,021 | Glucose-1-phosphate adenylyltransferase inhibitor         |
| 0,094 | 0,048 | Scyllo-inosamine-4-phosphate aminotransferase inhibitor   |
| 0,102 | 0,056 | Beta amyloid protein antagonist                           |
| 0,211 | 0,164 | (S)-6-hydroxynicotine oxidase inhibitor                   |
| 0,063 | 0,017 | Polyphosphate kinase inhibitor                            |
| 0,150 | 0,104 | UGT1A4 substrate                                          |
| 0,112 | 0,066 | Deoxycytidylate 5-hydroxymethyltransferase inhibitor      |
| 0,103 | 0,057 | GABA transporter 3 inhibitor                              |
| 0,138 | 0,092 | Protein synthesis stimulant                               |
| 0,069 | 0,023 | 1-Phosphofructokinase inhibitor                           |
| 0,153 | 0,108 | Stromelysin 2 inhibitor                                   |
| 0,100 | 0,055 | Protein kinase C inhibitor                                |
| 0,050 | 0,005 | Cyclomaltodextrin glucanotransferase inhibitor            |
| 0,083 | 0,039 | Dihydrolipoamide S-acetyltransferase inhibitor            |
| 0,106 | 0,062 | Aminoacylase inhibitor                                    |
| 0,104 | 0,060 | Nicotinamidase inhibitor                                  |
| 0,079 | 0,035 | Carnitine O-octanoyltransferase inhibitor                 |
| 0,136 | 0,092 | Subtilisin inhibitor                                      |
| 0,087 | 0,044 | Glutamate synthase (NADPH) inhibitor                      |
| 0,156 | 0,112 | CTGF expression inhibitor                                 |
| 0,067 | 0,024 | Phosphoglycerate dehydrogenase inhibitor                  |
| 0,102 | 0,060 | Glutamate (mGluR6) antagonist                             |
| 0,081 | 0,038 | Aralkylamine N-acetyltransferase inhibitor                |
| 0,107 | 0,065 | Serine O-acetyltransferase inhibitor                      |
| 0,113 | 0,070 | Phosphatidylinositol 3-kinase stimulant                   |
| 0,159 | 0,117 | Vascular adhesion protein 1 inhibitor                     |

|       |       |                                     |
|-------|-------|-------------------------------------|
| 0,113 | 0,070 | Estrone sulfotransferase inhibitor  |
| 0,070 | 0,027 | NAD+ diphosphatase inhibitor        |
| 0,060 | 0,017 | [Isocitrate dehydrogenase (NADP+    |
| 0,168 | 0,126 | Indolepyruvate C-methyltransfera:   |
| 0,191 | 0,149 | Gingipain K inhibitor               |
| 0,074 | 0,032 | Bacterial leucyl aminopeptidase in  |
| 0,102 | 0,060 | Arylformamidase inhibitor           |
| 0,060 | 0,018 | Microtubule stabilization           |
| 0,070 | 0,028 | Protein kinase C alpha inhibitor    |
| 0,060 | 0,018 | 6-Phospho-beta-glucosidase inhibi   |
| 0,067 | 0,026 | UGT2B20 substrate                   |
| 0,154 | 0,113 | Gallate decarboxylase inhibitor     |
| 0,158 | 0,117 | Gastrointestinal motility stimulant |
| 0,073 | 0,032 | 3-Hydroxyanthranilate 3,4-dioxyge   |
| 0,060 | 0,019 | Bis(5'-nucleosyl)-tetraphosphatase  |
| 0,102 | 0,061 | Antifungal enhancer                 |
| 0,164 | 0,123 | Stroke treatment                    |
| 0,065 | 0,025 | Propionate CoA-transferase inhibiti |
| 0,048 | 0,008 | Phosphopyruvate hydratase inhibi    |
| 0,065 | 0,025 | Protein-glutamate O-methyltransf    |
| 0,069 | 0,029 | ATP diphosphatase inhibitor         |
| 0,156 | 0,116 | Endopeptidase inhibitor             |
| 0,174 | 0,134 | Interleukin 10 agonist              |
| 0,104 | 0,064 | Glutamate N-acetyltransferase inh   |
| 0,147 | 0,107 | Antiarrhythmic                      |
| 0,090 | 0,051 | Guanidinopropionase inhibitor       |
| 0,086 | 0,047 | Heat shock protein 70 antagonist    |
| 0,076 | 0,037 | UGT2B7Y substrate                   |
| 0,076 | 0,037 | UGT2B7H substrate                   |
| 0,192 | 0,153 | 3'-Demethylstaurosporine O-meth     |
| 0,081 | 0,042 | Tryptophan-tRNA ligase inhibitor    |
| 0,080 | 0,041 | CYP4F12 substrate                   |
| 0,068 | 0,029 | Catechol 2,3-dioxygenase inhibitor  |
| 0,124 | 0,085 | 5-Formyltetrahydrofolate cyclo-lig  |
| 0,106 | 0,068 | Squalene epoxidase inhibitor        |
| 0,067 | 0,029 | Tyrosine transaminase inhibitor     |
| 0,148 | 0,110 | Atrolysin A inhibitor               |
| 0,102 | 0,065 | Phosphoenolpyruvate carboxykina     |
| 0,060 | 0,022 | Tubulin GTPase inhibitor            |
| 0,075 | 0,037 | 3-Hydroxydecanoyl-[acyl-carrier-p   |
| 0,107 | 0,069 | Glutathione synthase inhibitor      |
| 0,074 | 0,037 | Dihydrodipicolinate synthase inhi   |
| 0,060 | 0,023 | UDP-N-acetylglucosamine-lysosom     |
| 0,066 | 0,029 | Chalcone isomerase inhibitor        |
| 0,052 | 0,016 | Glucose-1-phosphatase inhibitor     |
| 0,087 | 0,051 | L-lysine oxidase inhibitor          |
| 0,068 | 0,032 | Acyl-CoA dehydrogenase inhibitor    |

|       |       |                                     |
|-------|-------|-------------------------------------|
| 0,071 | 0,035 | CDC25 phosphatase inhibitor         |
| 0,061 | 0,025 | dCTP deaminase inhibitor            |
| 0,083 | 0,047 | SULT2A1 substrate                   |
| 0,074 | 0,038 | 3,4-Dihydroxyphenylacetate 2,3-d    |
| 0,067 | 0,031 | N-formylglutamate deformylase in    |
| 0,136 | 0,101 | Tryptophanamidase inhibitor         |
| 0,067 | 0,032 | 2-Methyl-branched-chain-enoyl-Co    |
| 0,064 | 0,028 | Biotin-[propionyl-CoA-carboxylase   |
| 0,083 | 0,048 | Arginine decarboxylase inhibitor    |
| 0,061 | 0,025 | AMP nucleosidase inhibitor          |
| 0,053 | 0,018 | dCMP deaminase inhibitor            |
| 0,084 | 0,049 | Biliverdin reductase inhibitor      |
| 0,088 | 0,054 | 4-Hydroxybenzoate-CoA ligase inh    |
| 0,065 | 0,030 | Deoxyadenosine kinase inhibitor     |
| 0,083 | 0,048 | 11-Cis-retinyl-palmitate hydrolase  |
| 0,076 | 0,042 | L-Serine ammonia-lyase inhibitor    |
| 0,081 | 0,046 | Sphingosine 1-phosphate receptor    |
| 0,110 | 0,076 | Phospholipase A2 inhibitor          |
| 0,056 | 0,023 | Adenylosuccinate lyase inhibitor    |
| 0,050 | 0,016 | Antimitotic, Podophyllotoxin-like   |
| 0,048 | 0,015 | Small monomeric GTPase inhibitor    |
| 0,037 | 0,004 | NADH oxidase inhibitor              |
| 0,099 | 0,066 | Alanine racemase inhibitor          |
| 0,102 | 0,069 | Butyrate-CoA ligase inhibitor       |
| 0,147 | 0,115 | Cyclopentanone monooxygenase i      |
| 0,088 | 0,056 | Haloalkane dehalogenase inhibitor   |
| 0,052 | 0,020 | Polypeptide N-acetylgalactosamin    |
| 0,110 | 0,078 | Antitreponemal                      |
| 0,073 | 0,041 | Branched-chain-amino-acid transa    |
| 0,058 | 0,026 | Nucleoside-triphosphate-adenylat    |
| 0,173 | 0,141 | Muscle relaxant                     |
| 0,157 | 0,125 | P-glycoprotein 1 inhibitor          |
| 0,085 | 0,054 | 3-Isopropylmalate dehydrogenase     |
| 0,092 | 0,061 | 2-Aminoethylphosphonate-pyruva      |
| 0,075 | 0,043 | Fumarylacetoacetase inhibitor       |
| 0,049 | 0,018 | Glutaryl-CoA dehydrogenase inhib    |
| 0,069 | 0,038 | Asparagine-oxo-acid transaminase    |
| 0,050 | 0,019 | Phosphoenolpyruvate carboxykinase   |
| 0,047 | 0,016 | Endo-beta-N-acetylglucosaminidase   |
| 0,056 | 0,025 | 3-Phosphoshikimate 1-carboxyvinyl   |
| 0,046 | 0,015 | Glycolipid 3-alpha-mannosyltransf   |
| 0,079 | 0,048 | Beta 1 adrenoreceptor agonist       |
| 0,072 | 0,041 | Formimidoylglutamase inhibitor      |
| 0,099 | 0,068 | Chloramphenicol O-acetyltransferase |
| 0,130 | 0,100 | Tryptophan transaminase inhibitor   |
| 0,074 | 0,044 | Purine biosynthesis inhibitor       |
| 0,079 | 0,049 | DNA methylase inhibitor             |



|       |       |                                     |
|-------|-------|-------------------------------------|
| 0,056 | 0,026 | Deoxyguanosine kinase inhibitor     |
| 0,126 | 0,096 | Cytosol alanyl aminopeptidase inh   |
| 0,092 | 0,062 | Aromatic-amino-acid transaminas     |
| 0,051 | 0,021 | Neuraminidase inhibitor             |
| 0,049 | 0,020 | Glycogenin glucosyltransferase inh  |
| 0,087 | 0,057 | Argininosuccinate synthase inhibit  |
| 0,046 | 0,017 | Fucokinase inhibitor                |
| 0,051 | 0,022 | Bis(5'-nucleosyl)-tetraphosphatase  |
| 0,122 | 0,093 | Candidapepsin inhibitor             |
| 0,068 | 0,039 | Proline racemase inhibitor          |
| 0,101 | 0,072 | Histidine decarboxylase inhibitor   |
| 0,047 | 0,018 | HMG CoA reductase inhibitor         |
| 0,049 | 0,020 | Chelator, Iron                      |
| 0,121 | 0,092 | Protein-glutamate methylesterase    |
| 0,121 | 0,093 | Cycloartenol synthase inhibitor     |
| 0,049 | 0,020 | UDP-sugar diphosphatase inhibito    |
| 0,062 | 0,033 | Plus-end-directed kinesin ATPase i  |
| 0,071 | 0,043 | 3-Alpha-hydroxysteroid dehydroge    |
| 0,168 | 0,140 | Gestagen antagonist                 |
| 0,099 | 0,071 | D-Ornithine 4,5-aminomutase inhi    |
| 0,106 | 0,079 | CYP19 inhibitor                     |
| 0,074 | 0,046 | L-aminoadipate-semialdehyde def     |
| 0,059 | 0,032 | Uracil phosphoribosyltransferase i  |
| 0,114 | 0,086 | Xaa-Pro dipeptidyl-peptidase inhi   |
| 0,041 | 0,013 | [Skp1-protein]-hydroxyproline N-a   |
| 0,086 | 0,058 | HIV-1 integrase inhibitor           |
| 0,042 | 0,014 | Homoisocitrate dehydrogenase inl    |
| 0,076 | 0,049 | Glutamate dehydrogenase [NAD(P      |
| 0,072 | 0,045 | Glutamate (mGluR8) agonist          |
| 0,053 | 0,027 | CYP3A11 substrate                   |
| 0,047 | 0,021 | Phosphoserine transaminase inhib    |
| 0,063 | 0,037 | Adenylosuccinate synthase inhibi    |
| 0,057 | 0,032 | Methylcrotonoyl-CoA carboxylase     |
| 0,042 | 0,018 | Ribosylpyrimidine nucleosidase inl  |
| 0,029 | 0,005 | CYP11B1 substrate                   |
| 0,041 | 0,017 | Protein phosphatase 2A inhibitor    |
| 0,126 | 0,103 | Leucolysin inhibitor                |
| 0,047 | 0,024 | [hydroxymethylglutaryl-CoA reduc    |
| 0,156 | 0,133 | Antitussive                         |
| 0,044 | 0,020 | Bacillus subtilis ribonuclease inhi |
| 0,087 | 0,064 | tRNA (guanine-N1-)-methyltransfe    |
| 0,043 | 0,020 | Uridine kinase inhibitor            |
| 0,047 | 0,024 | Oligonucleotidase inhibitor         |
| 0,034 | 0,011 | Tartrate dehydrogenase inhibitor    |
| 0,063 | 0,040 | Linoleate isomerase inhibitor       |
| 0,112 | 0,089 | 3-Isopropylmalate dehydratase inl   |
| 0,097 | 0,074 | Kexin inhibitor                     |

|       |       |                                             |
|-------|-------|---------------------------------------------|
| 0,060 | 0,037 | Carbamoyl-serine ammonia-lyase              |
| 0,040 | 0,018 | Ethanolamine ammonia-lyase inhibi           |
| 0,040 | 0,018 | Ribose-5-phosphate adenylyltrans            |
| 0,053 | 0,031 | Cytidylate kinase inhibitor                 |
| 0,096 | 0,074 | CYP1A3 substrate                            |
| 0,191 | 0,169 | CYP2C18 substrate                           |
| 0,064 | 0,043 | 3-Oxoacid CoA-transferase inhibiti          |
| 0,063 | 0,042 | Erythro-3-hydroxyaspartate ammc             |
| 0,056 | 0,035 | CYP24 substrate                             |
| 0,079 | 0,057 | Catechol 1,2-dioxygenase inhibitor          |
| 0,138 | 0,117 | Antiparkinsonian, tremor relieving          |
| 0,068 | 0,047 | Tubulin-tyrosine ligase inhibitor           |
| 0,213 | 0,193 | CYP2C9 substrate                            |
| 0,098 | 0,078 | Anthranilate phosphoribosyltransf           |
| 0,060 | 0,040 | Glutamate formimidoyltransferase            |
| 0,150 | 0,130 | Urticaria treatment                         |
| 0,061 | 0,041 | UDP-glucuronate decarboxylase in            |
| 0,051 | 0,032 | [3-methyl-2-oxobutanoate dehydr             |
| 0,140 | 0,120 | Leishmanolysin inhibitor                    |
| 0,070 | 0,050 | Pantoate-beta-alanine ligase inhib          |
| 0,116 | 0,097 | Interleukin 4 antagonist                    |
| 0,095 | 0,076 | Homocitrate synthase inhibitor              |
| 0,053 | 0,034 | Malate dehydrogenase (oxaloacet             |
| 0,045 | 0,026 | Androst-4-ene-3,17-dione monoo              |
| 0,116 | 0,098 | Anticoagulant                               |
| 0,111 | 0,093 | Peptidyl-Lys metalloendopeptidas            |
| 0,118 | 0,100 | Aldehyde ferredoxin oxidoreducta            |
| 0,063 | 0,045 | UDP-N-acetylmuramoylalanine-D- <sub>1</sub> |
| 0,069 | 0,051 | Threonine-tRNA ligase inhibitor             |
| 0,066 | 0,049 | Ornithine carbamoyltransferase in           |
| 0,044 | 0,026 | GMP reductase inhibitor                     |
| 0,091 | 0,074 | Dihydrouracil oxidase inhibitor             |
| 0,036 | 0,019 | Alpha-1,3-mannosyl-glycoprotein :           |
| 0,219 | 0,202 | Retinoprotector                             |
| 0,053 | 0,037 | Glutamate (mGluR3) agonist                  |
| 0,120 | 0,104 | Plasmanyethanolamine desaturas              |
| 0,032 | 0,016 | Phytanoyl-CoA dioxygenase inhibit           |
| 0,071 | 0,055 | Succinate-semialdehyde dehydrog             |
| 0,033 | 0,018 | Glutamate (mGluR1a) agonist                 |
| 0,033 | 0,018 | Glutamate (mGluR5a) agonist                 |
| 0,205 | 0,190 | Antiprotozoal (Leishmania)                  |
| 0,072 | 0,056 | Glutathione S-transferase inhibitor         |
| 0,040 | 0,025 | Nucleoside phosphoacylhydrolase             |
| 0,119 | 0,104 | Antihemorrhagic                             |
| 0,087 | 0,072 | Granulocyte macrophage colony s             |
| 0,116 | 0,102 | Carboxypeptidase E inhibitor                |
| 0,032 | 0,017 | Nucleotidyltransferase inhibitor            |

|       |       |                                     |
|-------|-------|-------------------------------------|
| 0,070 | 0,055 | CYP2C2 substrate                    |
| 0,044 | 0,030 | Actin depolymerization stimulant    |
| 0,040 | 0,026 | ATP citrate lysase inhibitor        |
| 0,104 | 0,091 | Antineoplastic antimetabolite       |
| 0,042 | 0,029 | Strombine dehydrogenase inhibitor   |
| 0,047 | 0,034 | Fumarate hydratase inhibitor        |
| 0,049 | 0,036 | 3-Galactosyl-N-acetylglucosaminid   |
| 0,072 | 0,059 | Trans-octaprenyltranstransferase i  |
| 0,235 | 0,222 | Vasodilator, peripheral             |
| 0,029 | 0,017 | Mannokinase inhibitor               |
| 0,069 | 0,057 | Lactamase C inhibitor               |
| 0,032 | 0,020 | D-Alanine-alanyl-poly(glycerolpho:  |
| 0,035 | 0,023 | Cortisol sulfotransferase inhibitor |
| 0,034 | 0,022 | N-acetyllactosaminide beta-1,6-N-   |
| 0,045 | 0,033 | Pregnane X receptor antagonist      |
| 0,031 | 0,019 | Pyruvate synthase inhibitor         |
| 0,179 | 0,169 | Anti-Helicobacter pylori            |
| 0,028 | 0,018 | Alpha glucosidase I inhibitor       |
| 0,358 | 0,348 | Gluconate 2-dehydrogenase (acce     |
| 0,029 | 0,020 | Pantothenate kinase inhibitor       |
| 0,066 | 0,056 | NAD(P)H dehydrogenase (quinone      |
| 0,146 | 0,136 | Aryl-acylamidase inhibitor          |
| 0,018 | 0,009 | Calcineurin inhibitor               |
| 0,043 | 0,034 | Betaine-homocysteine S-methyltra    |
| 0,148 | 0,138 | Bone diseases treatment             |
| 0,074 | 0,065 | Retinol O-fatty-acyltransferase inh |
| 0,121 | 0,112 | N-Carbamoyl-D-amino acid hydrol     |
| 0,049 | 0,040 | Aspartate ammonia-lyase inhibitor   |
| 0,079 | 0,071 | Macrophage migration inhibitory f   |
| 0,102 | 0,093 | Beta lactamase inhibitor            |
| 0,119 | 0,111 | Corticosteroid antagonist           |
| 0,131 | 0,123 | Glucuronate isomerase inhibitor     |
| 0,035 | 0,027 | Phosphoglycerate kinase inhibitor   |
| 0,036 | 0,028 | Amidophosphoribosyltransferase i    |
| 0,029 | 0,020 | Streptomycin 6-kinase inhibitor     |
| 0,033 | 0,025 | Gentamicin 3'-N-acetyltransferase   |
| 0,037 | 0,029 | Ribose-phosphate diphosphokinas     |
| 0,042 | 0,034 | Asparagine synthase (glutamine-h    |
| 0,044 | 0,036 | S-methyl-5-thioadenosine phospho    |
| 0,086 | 0,078 | Methylenetetrahydrofolate dehyd     |
| 0,091 | 0,083 | Cholestenone 5alpha-reductase in    |
| 0,052 | 0,044 | Sepiapterin deaminase inhibitor     |
| 0,109 | 0,102 | Lanosterol 14 alpha demethylase i   |
| 0,035 | 0,029 | L(+)-Tartrate dehydratase inhibitor |
| 0,031 | 0,025 | tRNA (guanine-N7-)-methyltransfe    |
| 0,027 | 0,021 | GRP78 expression inhibitor          |
| 0,150 | 0,144 | Complement inhibitor                |

|       |       |                                                             |
|-------|-------|-------------------------------------------------------------|
| 0,077 | 0,071 | tRNA cytidyltransferase inhibitor                           |
| 0,021 | 0,016 | Sphingosine kinase stimulant                                |
| 0,042 | 0,037 | Arginine-tRNA ligase inhibitor                              |
| 0,054 | 0,049 | N-acetylmuramoyl-L-alanine amide                            |
| 0,126 | 0,121 | Aminopeptidase B inhibitor                                  |
| 0,051 | 0,046 | Assemblin inhibitor                                         |
| 0,054 | 0,050 | Urate transporter 1 inhibitor                               |
| 0,075 | 0,071 | Aminopeptidase I inhibitor                                  |
| 0,032 | 0,028 | 2-(acetamidomethylene)succinate                             |
| 0,013 | 0,009 | Demethylmacrocin O-methyltransferase                        |
| 0,010 | 0,006 | CYP11B2 substrate                                           |
| 0,034 | 0,031 | Procollagen galactosyltransferase                           |
| 0,012 | 0,008 | CDP-glycerol diphosphatase inhibitor                        |
| 0,076 | 0,073 | Homocysteine S-methyltransferase                            |
| 0,012 | 0,009 | Actin polymerization inhibitor                              |
| 0,045 | 0,042 | Spermidine synthase inhibitor                               |
| 0,012 | 0,009 | Mannitol 2-dehydrogenase inhibitor                          |
| 0,029 | 0,026 | Orsellinate decarboxylase inhibitor                         |
| 0,023 | 0,020 | Beta-galactoside alpha-2,3-sialyltransferase                |
| 0,026 | 0,023 | Theanine hydrolase inhibitor                                |
| 0,020 | 0,018 | Nucleotidyltransferase (FIV) inhibitor                      |
| 0,008 | 0,006 | CYP11B substrate                                            |
| 0,037 | 0,035 | Orotate phosphoribosyltransferase                           |
| 0,110 | 0,107 | Tripeptide aminopeptidase inhibitor                         |
| 0,023 | 0,021 | Dolichyldiphosphatase inhibitor                             |
| 0,050 | 0,048 | CDC25B inhibitor                                            |
| 0,144 | 0,142 | Mucorpepsin inhibitor                                       |
| 0,006 | 0,004 | Transcription factor rho inhibitor                          |
| 0,007 | 0,005 | Myelin associated glycoprotein analog                       |
| 0,087 | 0,084 | Alanine transaminase inhibitor                              |
| 0,034 | 0,032 | 2-Methylacyl-CoA dehydrogenase                              |
| 0,152 | 0,150 | Uric acid excretion stimulant                               |
| 0,041 | 0,039 | Glucose-1,6-bisphosphate synthase                           |
| 0,044 | 0,042 | 5'-Nucleotidase inhibitor                                   |
| 0,034 | 0,033 | Riboflavin kinase inhibitor                                 |
| 0,117 | 0,115 | 5 Hydroxytryptamine 2A agonist                              |
| 0,066 | 0,064 | 4a-Hydroxytetrahydrobiopterin dehydrogenase                 |
| 0,075 | 0,073 | Nitrile hydratase inhibitor                                 |
| 0,037 | 0,035 | Carbonic anhydrase XIV inhibitor                            |
| 0,011 | 0,010 | Macrocin O-methyltransferase inhibitor                      |
| 0,027 | 0,026 | Chitobiosyldiphosphodolichol beta-1,4-galactosyltransferase |
| 0,078 | 0,077 | Lysine decarboxylase inhibitor                              |
| 0,069 | 0,068 | Dopachrome isomerase inhibitor                              |
| 0,012 | 0,012 | Kanamycin kinase inhibitor                                  |



ylpentapeptide beta-N-acetylglucosaminyltransferase inhibitor

lycoprotein beta-1,3-N-acetylglucosaminyltransferase inhibitor





























l-phosphate N-acetylglucosaminophosphotransferase inhibitor

μcosylceramide N-acetylgalactosaminyltransferase inhibitor

















idecaprenol N-acetyl-beta-D-mannosaminyltransferase inhibitor





















nal-enzyme N-acetylglucosaminophosphotransferase inhibitor
